# Supplementary material for: Assembly of polysubstituted chiral cyclopropylaminesviahighly enantioselective Cu-catalyzed three-component cyclopropene alkenylamination
Source: Royal Society of Chemistry journal article supplement (doi:10.1039/d0cc01060j), 2020-01-01
Supplement: d0cc01060j1.pdf [file d0cc01060j1.pdf]

## Supporting Information

### Assembly of Polysubstituted Chiral Cyclopropylamines *via* Highly Enantioselective Cu-Catalyzed Three-component Cyclopropene Alkenylation

Yu Zhang,<sup>†</sup> Yuan Li,<sup>§</sup> Wei Zhou,<sup>‡</sup> Mengru Zhang,<sup>†</sup> Qian Zhang,<sup>†</sup> Ran Jia,<sup>\*§</sup> and Jinbo Zhao<sup>\*†‡</sup>

<sup>†</sup>Jilin Province Key Laboratory of Functional Organic Molecule Design & Synthesis,  
Department of Chemistry, Northeast Normal University, Changchun, 130024, P. R. China

<sup>‡</sup>Department of Chemistry and Biology, Changchun University of Technology, 2055 Yan'an  
Street, Changchun 130012, P. R. China

<sup>§</sup>Institute of Theoretical Chemistry, Jilin University, Changchun 130023, P. R. China

Email: zhaobj100@nenu.edu.cn; zhaojinbo@ccut.edu.cn

### Outline

|                                                                       |           |
|-----------------------------------------------------------------------|-----------|
| <b>1. General information</b> .....                                   | <b>2</b>  |
| <b>2. Experimental details</b>                                        |           |
| 2.1 Reaction optimization.....                                        | <b>3</b>  |
| 2.2 General procedure for Cu-catalyzed cyclopropene alkenylation..... | <b>5</b>  |
| 2.3 Procedure for 1 mmol scale reaction.....                          | <b>5</b>  |
| <b>3. Determination of the structure and absolute configuration</b>   |           |
| 3.1 Single crystal X-ray diffraction study of <b>4t</b> .....         | <b>6</b>  |
| 3.2 NOESY and H-H COSY spectra of compounds <b>4t-4v</b> .....        | <b>7</b>  |
| <b>4. Product characterization</b> .....                              | <b>10</b> |
| <b>5. DFT calculation details</b> .....                               | <b>25</b> |
| <b>References</b> .....                                               | <b>67</b> |
| <b>6. Copies of NMR spectra and HPLC chromatograph</b> .....          | <b>68</b> |

## 1. General Information

Unless otherwise noted, all reactions were carried out in anhydrous solvents distilled under a N<sub>2</sub> atmosphere. Tetrahydrofuran and dioxane were distilled over sodium with benzophenone as indicator. Palladium salts, ligands, CsCO<sub>3</sub>, NH<sub>2</sub>OH·HCl, *tert*-Butyldimethylsilyl chloride and substratebromobenzenes were purchased from commercial sources and used as received. *O*-(*tert*-butyldimethylsilyl) oxime were synthesized according to literature. <sup>1</sup>H NMR and <sup>13</sup>C NMR spectra were recorded on a Bruker 400 or 600 MHz spectrometer at 25°C. Chemical shifts (δ) are expressed in parts per million (ppm) relative to internal standard [0 ppm (TMS) for <sup>1</sup>H NMR and 77.0 ppm (CDCl<sub>3</sub>) for <sup>13</sup>C NMR]. High resolution mass spectra were recorded on a Bruker microTOF spectrometer. NMR were processed with MestReNova software. Enantiomeric excesses (ee) were determined by an Agilent 1260 I or II Series or Shimadzu HPLC on chiral stationary phases, with chiral columns from Daicel Corp. Flash chromatography was performed on silica gel 60 (particle size 300-400 mesh ASTM, purchased from Taizhou, China). Cyclopropenes,<sup>1</sup> alkenyl boronates,<sup>2</sup> and hydroxyamine benzoates<sup>3</sup> were synthesized according to the procedures of literature reports.

## 2. Experimental details

### 2.1 Reaction optimization

**Table S1.** Optimization of the racemic three-component cyclopropene vinylamination reaction (I).<sup>a</sup>

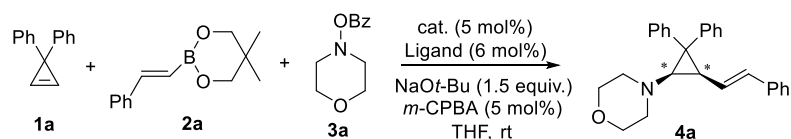

| Entry           | Catalyst | Ligand                            | Yield/% <sup>b</sup> |
|-----------------|----------|-----------------------------------|----------------------|
| 1               | CuCl     | dppbz                             | 80                   |
| 2               | TcCu     | dppbz                             | nr.                  |
| 3               | CuOAc    | dppbz                             | nr.                  |
| 4               | CuCN     | dppbz                             | 8                    |
| 5               | CuOTf    | dppbz                             | trace                |
| 6               | CuI      | dppbz                             | 8                    |
| 7               | CuCl     | Xantphos                          | 17                   |
| 8               | CuCl     | (±)-BINAP                         | 47                   |
| 9               | CuCl     | Dppe                              | 34                   |
| 10              | CuCl     | Dppp                              | trace                |
| 11              | CuCl     | Dppf                              | 7                    |
| 12 <sup>c</sup> | CuCl     | Tri(4-fluorophenyl)phosphine      | 31                   |
| 13 <sup>c</sup> | CuCl     | Tri(4-chlorophenyl)phosphine      | 80                   |
| 14 <sup>c</sup> | CuCl     | Tri( <i>tert</i> -butyl)phosphine | 69                   |
| 15 <sup>c</sup> | CuCl     | Tri( <i>o</i> -tolyl)phosphine    | 74                   |

<sup>a</sup> Conditions: cyclopropene (0.20 mmol, 1.0 equiv.), boronic ester **2** (0.24 mmol, 1.2 equiv.), **3** (0.24 mmol, 1.2 equiv.), Cu catalyst (0.010 mmol, 5 mol%), **L** (0.012 mmol, 6 mol%), NaOt-Bu (0.30 mmol, 1.5 equiv.), *m*-CPBA (0.010 mmol, 5 mol%), solvent (anhydrous, aged, 2 mL). <sup>b</sup> Isolated yields. <sup>c</sup> 12 mol% ligand was used.

**Table S2.** Optimization of the racemic three-component cyclopropene vinylamination reaction (II).<sup>a</sup>

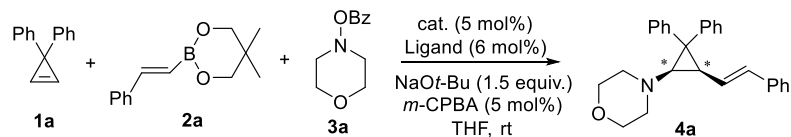

| Entry          | L                                          | 2a/eq | 3a/eq | Yield <sup>b</sup> /% |
|----------------|--------------------------------------------|-------|-------|-----------------------|
| 1              | Dppbz                                      | 1.2   | 1.2   | 80                    |
| 2              | Dppbz                                      | 1.5   | 1.5   | 83                    |
| 3              | Dppbz                                      | 2.0   | 2.0   | 91                    |
| 4 <sup>c</sup> | Tris(4-chlorophenyl)phosphine <sup>c</sup> | 2.0   | 2.0   | 83                    |

<sup>a</sup> Conditions: cyclopropene (0.20 mmol, 1.0 equiv.), boronic ester **2** (0.24 mmol, 1.2 equiv.), **3** (0.24 mmol, 1.2 equiv.), Cu catalyst (0.010 mmol, 5 mol%), **L** (0.012 mmol, 6 mol%), NaOt-Bu (0.30 mmol, 1.5 equiv.), *m*-CPBA (0.010 mmol, 5 mol%), solvent (anhydrous, aged, 2 mL). <sup>b</sup> Isolated yields. <sup>c</sup> 12 mol% ligand was used.

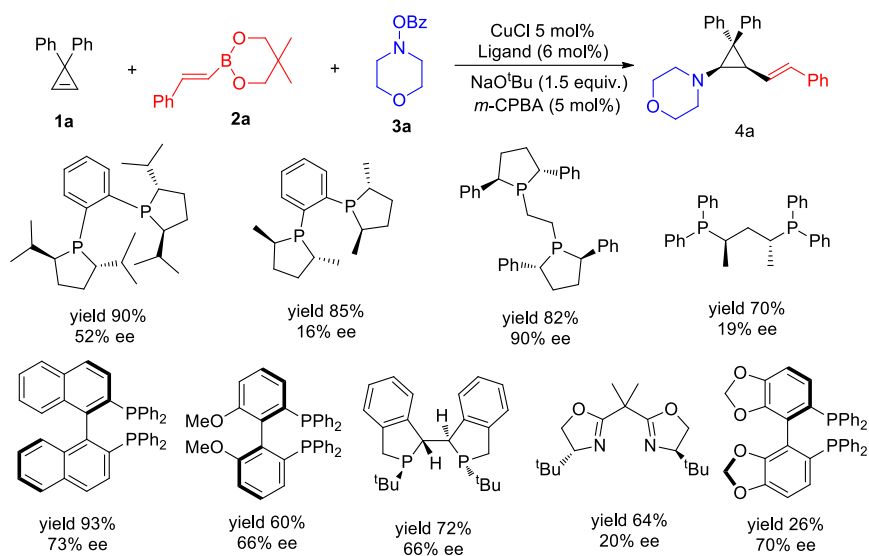

**Scheme S1.** Ligand effects on the enantioselective reaction.



## 2.2 General procedure for Cu-catalyzed cyclopropene alkenylation

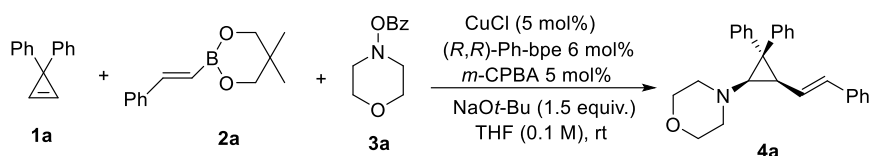

In a nitrogen filled glovebox, CuCl (1.0 mg, 0.01 mmol, 0.05 equiv.), (*R,R*)-Ph-bpe (6.3 mg, 0.012 mmol, 0.06 equiv.) were dissolved in anhydrous THF (2 mL). The mixture stirred at room temperature for ca. 2 min before *m*-CPBA (2 mg, 0.01 mmol, 0.05 equiv), NaOt-Bu (28.8 mg, 0.3 mmol, 1.5 equiv), and boronic ester (65 mg, 0.30 mmol, 1.5 equiv.) were sequentially added. The mixture was stirred for about 5 min, then cyclopropene (0.2 mmol, 38  $\mu$ L) and morpholino benzoate (62.3 mg, 0.3 mmol, 1.5 equiv) were sequentially added. The resulting mixture was stirred at room temperature and monitored by TLC. After complete conversion, the solvent was removed *in vacuo* and residue was subjected to flash chromatography (eluent: petroleum/EtOAc = 50/1) to afford the title compound **4a**.

## 2.3 Procedure for 1 mmol scale reaction.

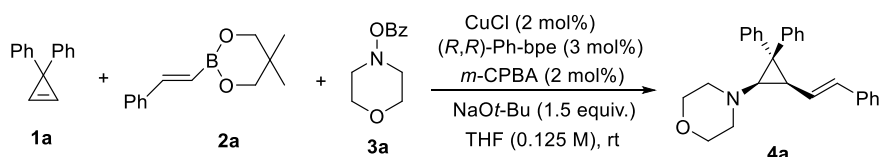

In a N<sub>2</sub> filled glovebox, CuCl (2.0 mg, 0.02 mmol, 0.02 equiv.) and (*R,R*)-Ph-BPE (15.2 mg, 0.03 mmol, 0.03 equiv.) were dissolved in anhydrous THF (8 mL). The mixture was stirred at room temperature for ca. 2 min before *m*-CPBA (2.0 mg, 0.02 mmol, 0.02 equiv), NaOt-Bu (144 mg, 1.5 mmol, 1.5 equiv.) and boronic ester (259.2 mg, 1.20 mmol, 1.2 equiv.) were successively added. The mixture was stirred for about 5 min at room temperature, then cyclopropene (190  $\mu$ L, 1 mmol, added dropwise) and morpholino benzoate (248.6 mg, 1.2 mmol, 1.2 equiv) were sequentially added. The resulting mixture was stirred at room temperature and monitored by TLC. After complete conversion, the solvent was removed *in vacuo* and residue was subjected to flash chromatography (eluent: petroleum/EtOAc = 50/1) to afford the title compound **4a** (305.8 mg, 80%).

### 3. Determination of structure and absolute configuration.

#### 3.1 Single crystal X-ray diffraction study of **4t** (CCDC# 1970687).

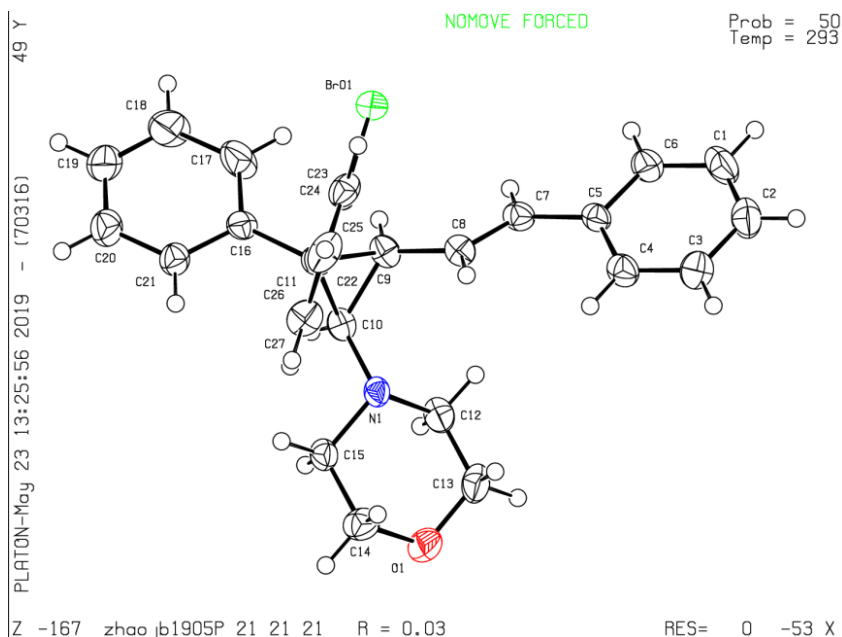

|                        |                |                                  |
|------------------------|----------------|----------------------------------|
| Bond precision:        | C-C = 0.0051 Å | Wavelength=1.54178               |
| Cell:                  | a=9.6932 (5)   | b=10.7179 (6)                    |
|                        | alpha=90       | beta=90                          |
|                        |                | gamma=90                         |
| Temperature:           | 293 K          |                                  |
|                        | Calculated     | Reported                         |
| Volume                 | 2269.2 (2)     | 2269.2 (2)                       |
| Space group            | P 21 21 21     | P 21 21 21                       |
| Hall group             | P 2ac 2ab      | P 2ac 2ab                        |
| Moiety formula         | C27 H26 Br N O | C27 H26 Br N O                   |
| Sum formula            | C27 H26 Br N O | C27 H26 Br N O                   |
| Mr                     | 460.39         | 460.40                           |
| Dx, g cm <sup>-3</sup> | 1.348          | 1.348                            |
| Z                      | 4              | 4                                |
| Mu (mm <sup>-1</sup> ) | 2.595          | 2.595                            |
| F000                   | 952.0          | 952.0                            |
| F000'                  | 951.45         |                                  |
| h, k, lmax             | 11, 13, 26     | 11, 13, 26                       |
| Nref                   | 4267 [ 2439]   | 4191                             |
| Tmin, Tmax             |                |                                  |
| Tmin'                  |                |                                  |
| Correction method=     | Not given      |                                  |
| Data completeness=     | 1.72/0.98      | Theta (max)= 69.693              |
| R(reflections)=        | 0.0282 ( 3921) | wR2(reflections)= 0.0640 ( 4191) |
| S =                    | 1.072          | Npar= 271                        |

**Figure S1.** X-ray single crystal of **4t** and diffraction data.

3.2. NOESY and H-H COSY spectra of selected compounds **4t-4v**.

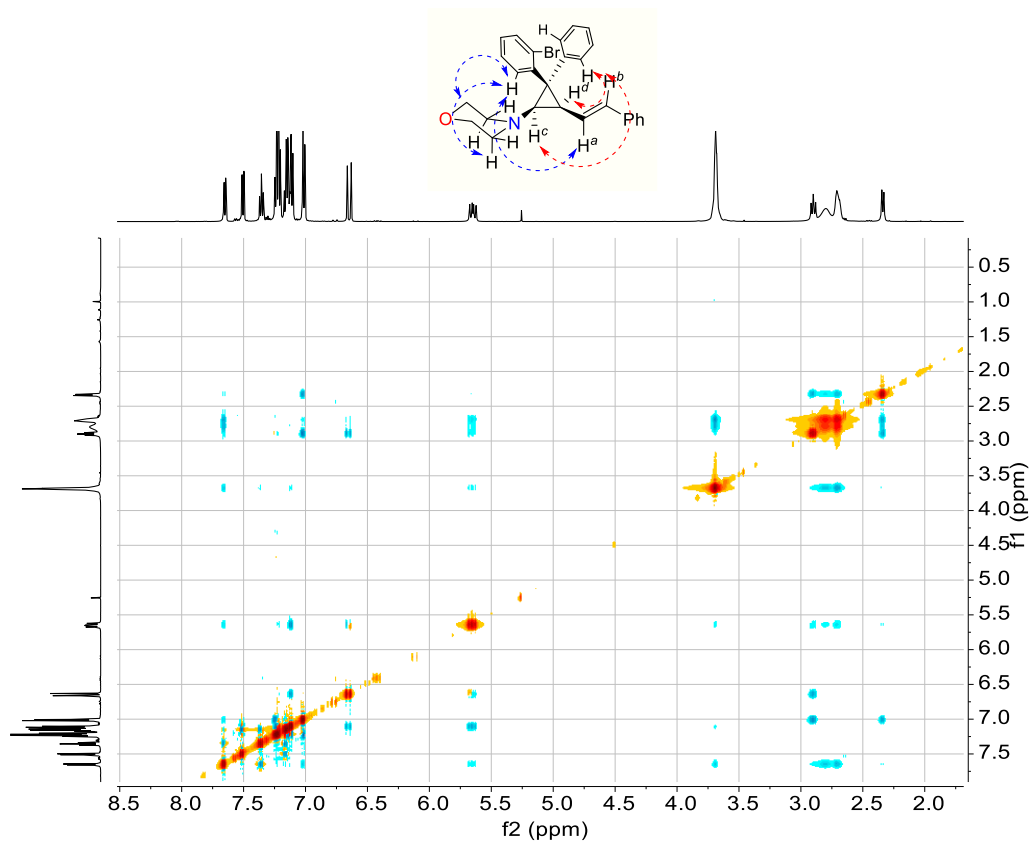

Figure S2. NOESY spectrum of **4t**.

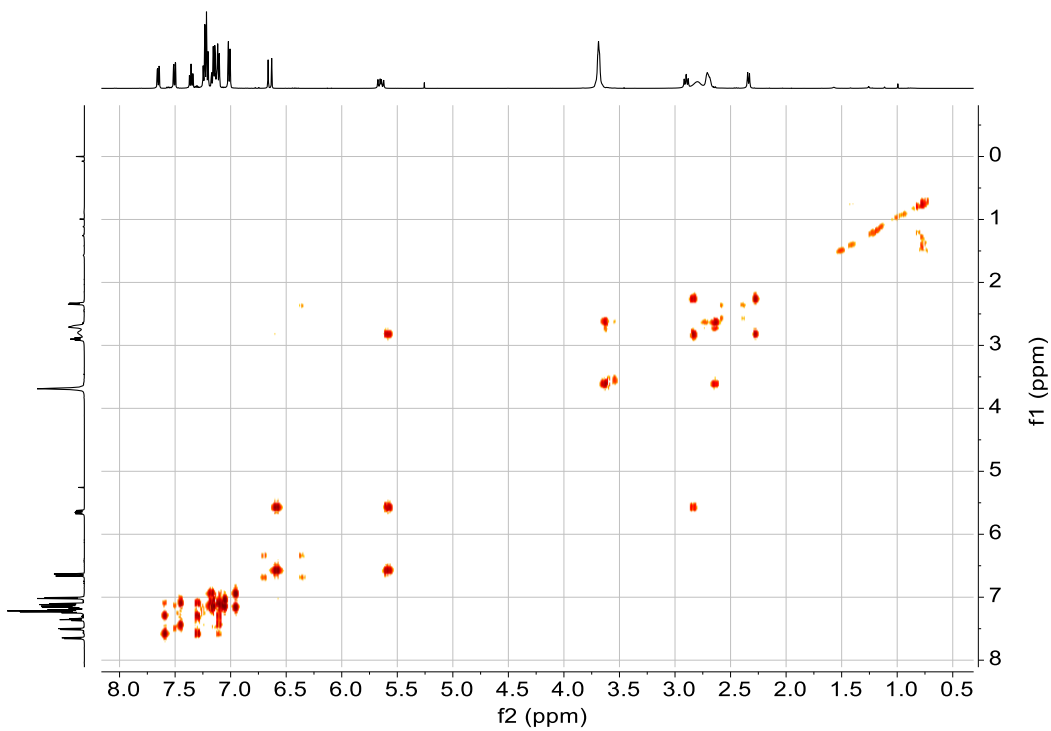

Figure S3. H-H COSY spectrum of **4t**.

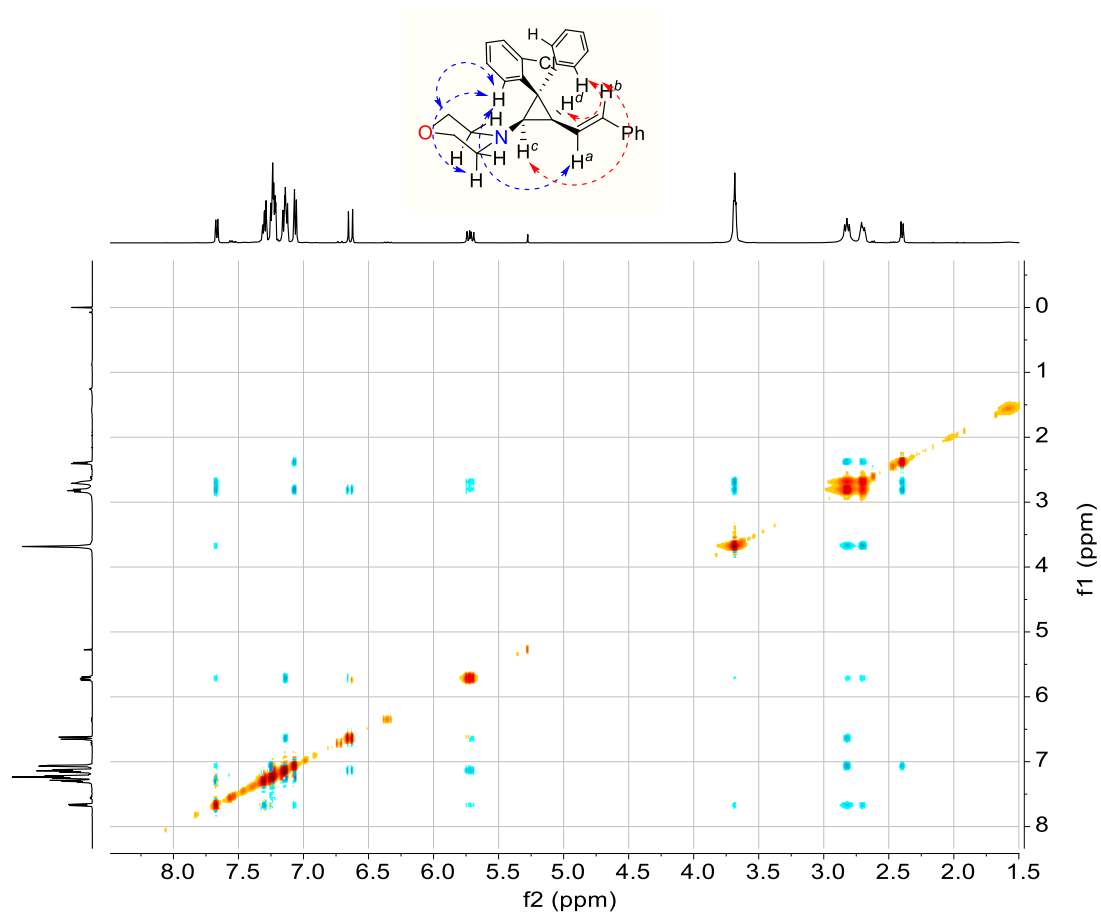

**Figure S4.** NOESY spectrum of **4u**.

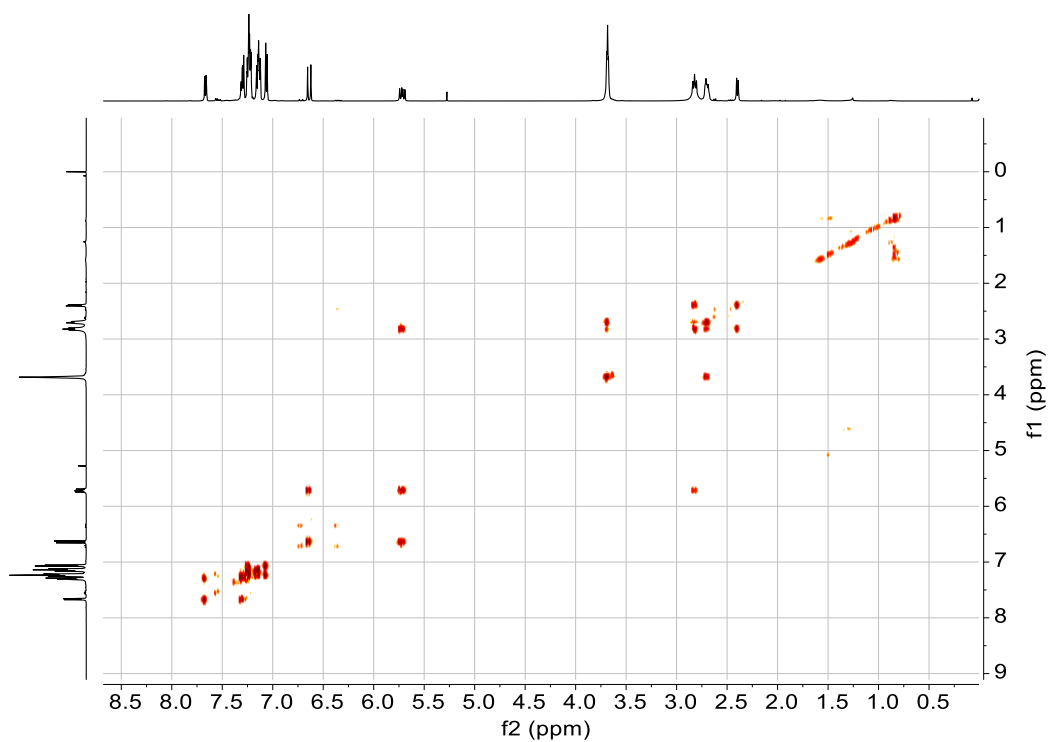

**Figure S5.** H-H COSY spectrum of **4u**.

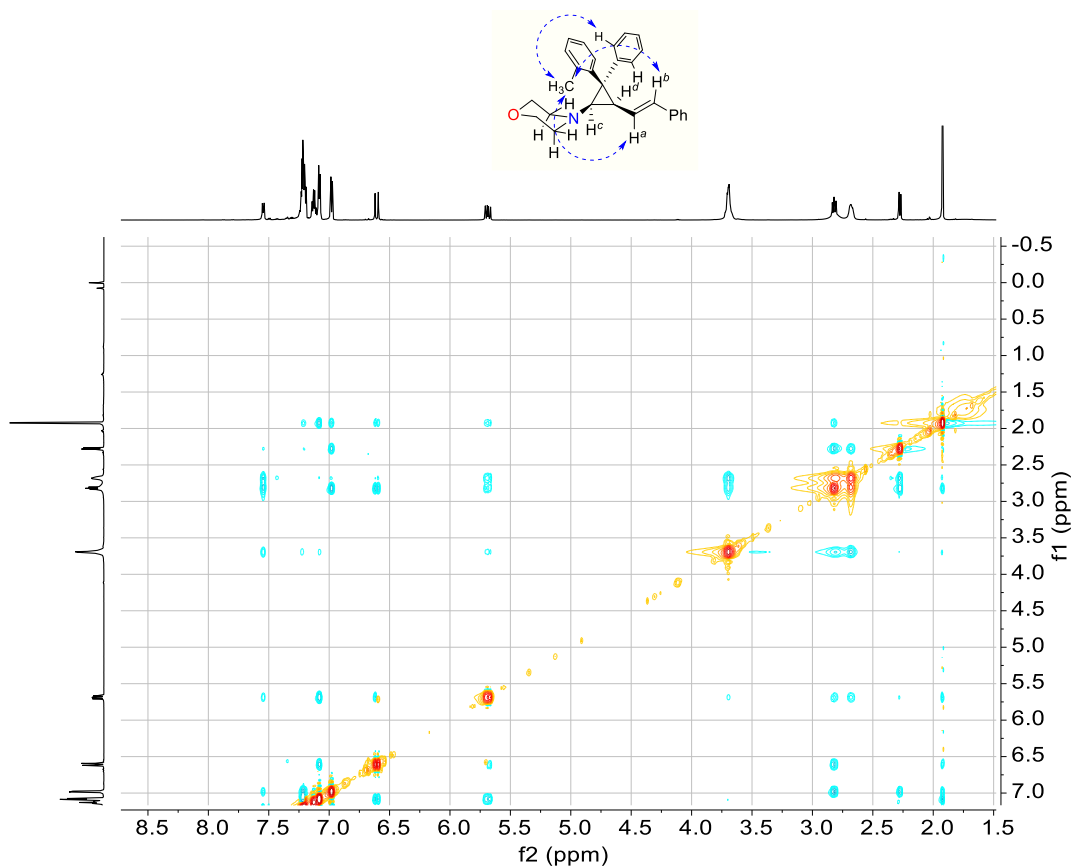

Figure S6. NOESY spectrum of 4v.

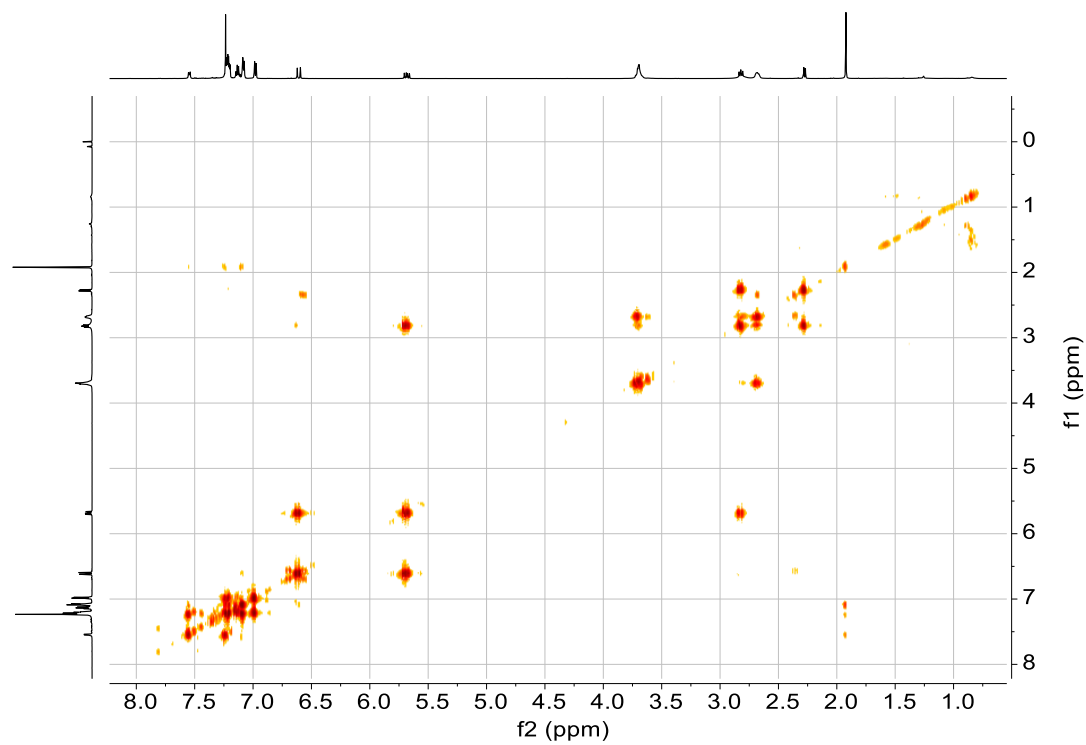

Figure S7. H-H COSY spectrum of 4v.

#### 4. Characterization of all new compounds.

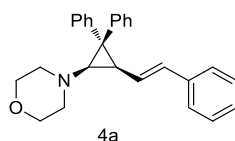

**4-((1R, 3R)-2, 2-diphenyl-3-((E)-styryl)cyclopropyl)morpholine (4a)**: following the general procedure (II), the reaction of 3,3-diphenyl cyclopropene (0.2 mmol, 38.4 mg), (*E*)-5,5-dimethyl-2-styryl-1,3,2-dioxaborinane (0.30 mmol, 65 mg) and morpholino benzoate (0.30 mmol, 62.3 mg) afforded product **4a** (62.3 mg, 82% yield, 90% ee) as a colorless oil.

$[\alpha]_D^{19} = 269.3$  ( $c = 1.0$ ,  $\text{CHCl}_3$ ) for 90% ee.

$^1\text{H NMR}$  (600 MHz,  $\text{CDCl}_3$ )  $\delta$  7.48-7.44 (m, 2H), 7.30-7.22 (m, 10H), 7.21-7.12 (m, 3H), 6.62 (d,  $J = 15.6$  Hz, 1H), 6.14 (dd,  $J = 15.6, 10.2$  Hz, 1H), 3.71-3.59 (m, 4H), 2.92-2.72 (m, 2H), 2.72-2.63 (m, 2H), 2.61 (d,  $J = 7.8$  Hz, 1H), 2.49 (dd,  $J = 10.2, 7.8$  Hz, 1H).

$^{13}\text{C NMR}$  (150 MHz,  $\text{CDCl}_3$ )  $\delta$  147.0, 139.3, 137.8, 131.2, 130.2, 128.6, 128.5, 128.30, 128.29, 127.9, 126.8, 126.17, 126.15, 125.8, 66.7, 57.1, 54.3, 42.2, 34.5.

**HRMS** (ESI-TOF) ( $m/z$ ): Calcd for  $\text{C}_{27}\text{H}_{28}\text{NO}$  ( $[\text{M}+\text{H}]^+$ ), 382.2165, found 382.2135.

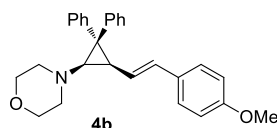

**4-((1R, 3R)-3-((E)-4-methoxystyryl)-2, 2-diphenylcyclopropyl)morpholine (4b)**: following the general procedure (II), the reaction of 3,3-diphenyl cyclopropene (0.2 mmol, 38.4 mg), (*E*)-5,5-dimethyl-2-(4-methoxystyryl)-1,3,2-dioxaborinane (0.30 mmol, 74.1 mg) and morpholino benzoate (0.30 mmol, 63.2 mg) afforded product **4b** (53.5 mg, 65% yield, 93% ee) as a yellow oil.

$[\alpha]_D^{19} = 171.9$  ( $c = 1.0$ ,  $\text{CHCl}_3$ ) for 93% ee.

$^1\text{H NMR}$  (600 MHz,  $\text{CDCl}_3$ )  $\delta$  7.47-7.43 (m, 2H), 7.28-7.22 (m, 6H), 7.22-7.14 (m, 4H), 6.85-6.81 (m, 2H), 6.57 (d,  $J = 16.2$  Hz, 1H), 5.98 (dd,  $J = 16.2, 10.2$  Hz, 1H), 3.79 (s, 3H), 3.70-3.61 (m, 4H), 2.88-2.74 (m, 2H), 2.73-2.64 (m, 2H), 2.59 (d,  $J = 7.8$  Hz, 1H), 2.47 (dd,  $J = 10.2, 7.8$  Hz, 1H);

$^{13}\text{C NMR}$  (150 MHz,  $\text{CDCl}_3$ )  $\delta$  158.7, 147.1, 139.5, 131.3, 130.8, 129.6, 128.47, 128.35, 127.9, 126.9, 126.1, 126.0, 114.0, 66.8, 57.0, 55.3, 54.3, 41.2, 34.6;

**HRMS** (ESI-TOF) ( $m/z$ ): Calcd for  $\text{C}_{28}\text{H}_{30}\text{NO}_2$  ( $[\text{M}+\text{H}]^+$ ), 412.2271, found 412.2270.

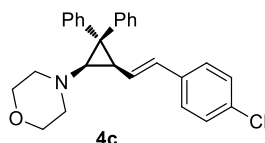

**4-((1R, 3R)-3-((E)-4-chlorostyryl)-2, 2-diphenylcyclopropyl)morpholine (4c)**: following the general procedure (II), the reaction of 3,3-diphenyl cyclopropene (0.2 mmol, 38.4 mg), (*E*)-2-(4-chlorostyryl)-5,5-dimethyl-1,3,2-dioxaborinane (0.30 mmol, 75.1 mg) and morpholino benzoate (0.30 mmol, 62.3 mg) afforded product **4c** (65.6 mg, 79% yield, 98% ee) as a colorless oil.

$[\alpha]_D^{19} = 273.1$  ( $c = 1.0$ ,  $\text{CHCl}_3$ ) for 98% ee.

**<sup>1</sup>H NMR** (600 MHz, CDCl<sub>3</sub>) δ 7.44 (d, *J* = 7.2 Hz, 2H), 7.28-7.20 (m., 8H), 7.20 – 7.12 (m, 4H), 6.57 (d, *J* = 16.2 Hz, 1H), 6.11 (dd, *J* = 15.6., 10.2 Hz, 1H), 3.72 – 3.58 (m, 4H), 2.80 (s, 2H), 2.69 – 2.63 (m, 2H), 2.62(d, *J*=7.8Hz, 1H), 2.48 (dd, *J* = 10.2, 8.4 Hz, 1H).

**<sup>13</sup>C NMR** (150 MHz, CDCl<sub>3</sub>) δ 146.8, 139.2, 136.3, 132.3, 131.2, 129.1, 128.9, 128.7, 128.5, 128.3, 128.0, 126.9, 126.24,126.21, 66.6, 57.2, 54.3, 42.4, 34.4.

**HRMS** (ESI-TOF) (*m/z*): Calcd for C<sub>27</sub>H<sub>27</sub>ClNO ([M+H]<sup>+</sup>), 416.1776, found 416.1770.

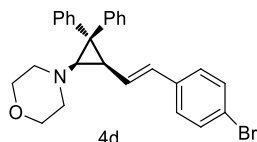

**4-((1R, 3R)-3-((E)-4-bromostyryl)-2, 2-diphenylcyclopropyl)morpholine (4d)**: following the general procedure (II), the reaction of 3,3-diphenyl cyclopropene (0.2 mmol, 38.4 mg), (E)-2-(4-bromostyryl)-5,5-dimethyl-1,3,2-dioxaborinane (0.30 mmol, 88.5 mg) and morpholino benzoate (0.30 mmol, 63.3 mg) afforded product **4d** (59.7 mg, 65% yield, 91% ee) as a white solid.

m.p. 70-71 °C.

[α]<sub>D</sub><sup>19</sup> = 269.3 (c = 1.0, CHCl<sub>3</sub>) for 91% ee.

**<sup>1</sup>H NMR** (600 MHz, CDCl<sub>3</sub>) δ 7.43 (d, *J* = 7.8 Hz, 2H), 7.38 (d, *J* = 8.4 Hz, 2H), 7.29 – 7.21 (m, 6H), 7.12-7.21 (m, 2H), 7.11 (d, *J* = 8.4 Hz, 2H), 6.55 (d, *J* = 15.6 Hz, 1H), 6.13 (dd, *J* = 16.2, 10.2 Hz, 1H), 3.74 – 3.57 (m, 4H), 2.80 (s, 2H), 2.73 – 2.58 (m, 3H), 2.48 (dd, *J* = 9.6, 8.4 Hz, 1H).

**<sup>13</sup>C NMR** (150 MHz, CDCl<sub>3</sub>) δ 146.7, 139.2, 136.7, 131.7, 131.2, 129.3, 129.0, 128.5, 128.3, 128.0, 127.3, 126.25, 126.21, 120.4, 66.6, 57.2, 54.3, 42.4, 34.4.

**HRMS** (ESI-TOF) (*m/z*): Calcd for C<sub>27</sub>H<sub>27</sub>BrNO ([M+H]<sup>+</sup>), 460.1271, found 460.1263.

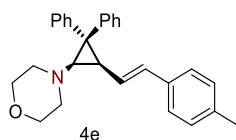

**4-((1R, 3R)-3-((E)-4-methylstyryl)-2, 2-diphenylcyclopropyl)morpholine (4e)**: following the general procedure (II), the reaction of 3,3-diphenyl cyclopropene (0.2 mmol, 38.4 mg), (E)-5,5-dimethyl-2-(4-methylstyryl)-1,3,2-dioxaborinane (0.30 mmol, 69.0 mg) and morpholino benzoate (0.30 mmol, 62.9 mg) afforded product **4e** (53.0 mg, 67% yield, 98% ee) as a white solid.

m.p. 56-57 °C

[α]<sub>D</sub><sup>19</sup> = 273.6 (c = 1.0, CHCl<sub>3</sub>) for 98% ee.

**<sup>1</sup>H NMR** (600 MHz, CDCl<sub>3</sub>) δ 7.45 (d, *J* = 8.4 Hz, 2H), 7.28 – 7.21 (m, 6H), 7.21 – 7.10 (m, 4H), 7.08 (d, *J* = 7.8 Hz, 2H), 6.59 (d, *J* = 15.6 Hz, 1H), 6.08 (dd, *J* = 15.6, 10.2 Hz, 1H), 3.68-3.60(m, 4H), 2.79 (s, 2H), 2.69-2.65 (m, 2H), 2.60 (d, *J* = 7.8 Hz, 1H), 2.47 (dd, *J* = 10.2, 7.8 Hz, 1H), 2.31 (s, 3H).

**<sup>13</sup>C NMR** (150 MHz, CDCl<sub>3</sub>) δ 147.0, 139.4, 136.6, 135.1, 131.3, 130.0, 129.2, 128.4, 128.3, 127.9, 127.2, 126.12, 126.09, 125.7, 66.7, 57.0, 54.3, 42.1, 34.5, 21.1.

**HRMS** (ESI-TOF) (*m/z*): Calcd for C<sub>28</sub>H<sub>30</sub>NO ([M+H]<sup>+</sup>), 396.2322, found 396.2329.

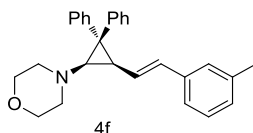

**4-((1R, 3R)-3-((E)-3-methylstyryl)-2, 2-diphenylcyclopropyl)morpholine (4f)**: following the general procedure (II), the reaction of 3,3-diphenyl cyclopropene (0.2 mmol, 38.4 mg), (E)-5,5-dimethyl-2-(3-methylstyryl)-1,3,2-dioxaborinane (0.30 mmol, 70 mg) and morpholino benzoate (0.30 mmol, 63 mg) afforded product **4f** (46.1 mg, 58% yield, 90% ee) as a colorless oil.

$[\alpha]_D^{19} = 199.7$  ( $c = 1.0$ ,  $\text{CHCl}_3$ ) for 90% ee.

**$^1\text{H NMR}$**  (600 MHz,  $\text{CDCl}_3$ )  $\delta$  7.48-7.43 (m, 2H), 7.30-7.22 (m, 6H), 7.21-7.14 (m, 3H), 7.10-7.05 (m, 2H), 7.02-6.97 (m, 1H), 6.60 (d,  $J = 16.2$  Hz, 1H), 6.11 (dd,  $J = 16.2, 10.2$  Hz, 1H), 3.71-3.61 (m, 4H), 2.87-2.76 (m, 2H), 2.71-2.65 (m, 2H), 2.61 (d,  $J = 7.8$  Hz, 1H), 2.48 (dd,  $J = 10.2, 7.8$  Hz, 1H), 2.32 (s, 3H);

**$^{13}\text{C NMR}$**  (150 MHz,  $\text{CDCl}_3$ )  $\delta$  147.1, 139.4, 138.2, 137.8, 131.3, 130.3, 128.5, 128.3, 128.1, 128.0, 127.6, 126.7, 126.18, 126.14, 125.5, 122.9, 66.7, 57.1, 54.3, 42.2, 34.6, 21.4;

**HRMS** (ESI-TOF) ( $m/z$ ): Calcd for  $\text{C}_{28}\text{H}_{30}\text{NO}$  ( $[\text{M}+\text{H}]^+$ ), 396.2322, found 396.2325.

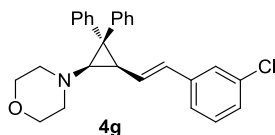

**4-((1R, 3R)-3-((E)-3-chlorostyryl)-2, 2-diphenylcyclopropyl)morpholine (4g)**: following the general procedure (II), the reaction of 3,3-diphenyl cyclopropene (0.2 mmol, 38.4 mg), (E)-5,5-dimethyl-2-(3-chlorostyryl)-1,3,2-dioxaborinane (0.30 mmol, 74 mg) and morpholino benzoate (0.30 mmol, 63.4 mg) afforded product **4g** (74.3 mg, 89% yield, 97% ee) as a colorless oil.

$[\alpha]_D^{19} = 276.1$  ( $c = 0.5$ ,  $\text{CHCl}_3$ ) for 97% ee.

**$^1\text{H NMR}$**  (600 MHz,  $\text{CDCl}_3$ )  $\delta$  7.47-7.43 (m, 2H), 7.30-7.10 (m, 12H), 6.56 (d,  $J = 16.2$  Hz, 1H), 6.15 (dd,  $J = 16.2, 10.2$  Hz, 1H), 3.73-3.60 (m, 4H), 2.93-2.72 (m, 2H), 2.70-2.60 (m, 3H), 2.48 (dd,  $J = 10.2, 7.8$  Hz, 1H);

**$^{13}\text{C NMR}$**  (150 MHz,  $\text{CDCl}_3$ )  $\delta$  146.8, 139.7, 139.2, 134.5, 131.1, 130.1, 129.8, 128.5, 128.3, 128.0, 126.7, 126.3, 126.2, 125.8, 123.9, 66.7, 57.3, 54.3, 42.6, 34.4.

**HRMS** (ESI-TOF) ( $m/z$ ): Calcd for  $\text{C}_{27}\text{H}_{27}\text{ClNO}$  ( $[\text{M}+\text{H}]^+$ ), 416.1776, found 416.1771.

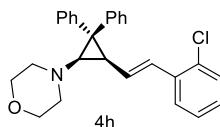

**4-((1R, 3R)-3-((E)-2-chlorostyryl)-2, 2-diphenylcyclopropyl)morpholine (4h)**: following the general procedure (II), the reaction of 3,3-diphenyl cyclopropene (0.2 mmol, 38.4 mg), (E)-2-(2-chlorostyryl)-5,5-dimethyl-1,3,2-dioxaborinane (0.30 mmol, 75.8 mg) and morpholino benzoate (0.30 mmol, 62.3 mg) afforded product **4h** (42.3 mg, 51% yield, 93% ee) as a white solid.

m.p. 63-64 °C

$[\alpha]_D^{12} = 229.7$  ( $c = 1.0$ ,  $\text{CHCl}_3$ ) for 93% ee.



**<sup>1</sup>H NMR** (600 MHz, CDCl<sub>3</sub>) δ 7.48 – 7.44 (m, 2H), 7.32 (dd, *J* = 7.8, 1.2 Hz, 1H), 7.30-7.23(m, 6H), 7.22 – 7.08 (m, 5H), 7.02 (d, *J* = 16.2 Hz, 1H), 6.13 (dd, *J* = 16.2 10.2 Hz, 1H), 3.70 – 3.62 (m, 4H), 2.82 (s, 2H), 2.72 – 2.66 (m, 2H), 2.64 (d, *J* = 7.8 Hz, 1H), 2.58 (dd, *J* = 10.2, 8.4 Hz, 1H).

**<sup>13</sup>C NMR** (150 MHz, CDCl<sub>3</sub>) δ 146.7, 139.2, 135.7, 132.2, 131.24, 131.22, 129.6, 128.5, 128.3, 128.0, 127.8, 126.8, 126.4, 126.24, 126.22, 126.1, 66.7, 57.3, 54.3, 42.6, 34.4.

**HRMS** (ESI-TOF) (*m/z*): Calcd for C<sub>27</sub>H<sub>27</sub>ClNO ([M+H]<sup>+</sup>), 416.1776, found 416.1785.

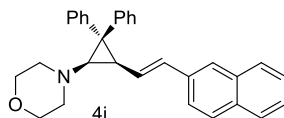

**4-((1*R*, 3*R*)-3-((*E*)-2-(naphthalen-2-yl)vinyl)-2, 2-diphenylcyclopropyl)morpholine (**4i**):**

following the general procedure (II), the reaction of 3,3-diphenyl cyclopropene (0.2 mmol, 38.4 mg), (*E*)-5,5-dimethyl-2-(2-(naphthalen-2-yl)vinyl)-1,3,2-dioxaborinane (0.30 mmol, 80.1 mg) and morpholino benzoate (0.30 mmol, 62.3 mg) afforded product **4i** (60.3 mg, 70% yield, 96% ee) as a white solid.

m.p. 76-77 °C.

[α]<sub>D</sub><sup>19</sup> = 186.4 (c = 1.0, CHCl<sub>3</sub>) for 96% ee.

**<sup>1</sup>H NMR** (600 MHz, CDCl<sub>3</sub>) δ 7.78 – 7.73 (m, 2H), 7.71 (d, *J* = 9.0 Hz, 1H), 7.61 (s, 1H), 7.48 (d, *J* = 7.2 Hz, 2H), 7.46 – 7.36 (m, 3H), 7.29 – 7.23 (m, 6H), 7.22 – 7.14 (m, 2H), 6.78 (d, *J* = 15.6 Hz, 1H), 6.26 (dd, *J* = 16.2, 10.2 Hz, 1H), 3.72 – 3.61 (m, 4H), 2.81 (s, 2H), 2.74 – 2.67 (m, 2H), 2.64 (d, *J* = 7.8 Hz, 1H), 2.54 (dd, *J* = 10.2, 7.8 Hz, 1H).

**<sup>13</sup>C NMR** (150 MHz, CDCl<sub>3</sub>) δ 147.0, 139.3, 135.3, 133.7, 132.6, 131.3, 130.4, 128.9, 128.5, 128.3, 128.2, 128.0, 127.8, 127.6, 126.22, 126.20, 126.17, 125.5, 125.1, 123.4, 66.7, 57.2, 54.3, 42.4, 34.6.

**HRMS** (ESI-TOF) (*m/z*): Calcd for C<sub>31</sub>H<sub>30</sub>NO ([M+H]<sup>+</sup>), 432.2322, found 432.2330.

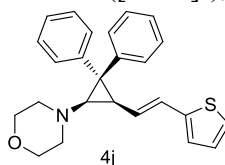

**4-((1*R*,3*R*)-2,2-Diphenyl-3-((*E*)-2-(thiophen-2-yl)vinyl)cyclopropyl)morpholine (**4j**):**

following the general procedure (II), the reaction of 3,3-diphenyl cyclopropene (0.2 mmol, 38.4 mg), (*E*)-5,5-dimethyl-2-(2-(thiophen-2-yl)vinyl)-1,3,2-dioxaborinane (0.30 mmol, 66.7 mg) and morpholino benzoate (0.30 mmol, 62.0 mg) afforded product **4j** (49.6 mg, 65% yield, 95% ee) as a yellow oil.

[α]<sub>D</sub><sup>12</sup> = 540.1 (c = 1.0, CHCl<sub>3</sub>) for 95% ee..

**<sup>1</sup>H NMR** (600 MHz, CDCl<sub>3</sub>) δ 7.44 (d, *J* = 7.2 Hz, 2H), 7.29 – 7.21 (m, 6H), 7.21-7.13 (m, 2H), 7.06 (d, *J* = 4.8 Hz, 1H), 6.92 (dd, *J* = 5.4, 3.6 Hz, 1H), 6.85 (d, *J* = 3.6 Hz, 1H), 6.74 (d, *J* = 15.6 Hz, 1H), 6.00 (dd, *J* = 15.6, 10.2 Hz, 1H), 3.73 – 3.58 (m, 4H), 2.78 (s, 2H), 2.72 – 2.64 (m, 2H), 2.62 (d, *J* = 7.8 Hz, 1H), 2.42 (dd, *J* = 10.2, 7.8 Hz, 1H).

**<sup>13</sup>C NMR** (150 MHz, CDCl<sub>3</sub>) δ 146.9, 143.4, 139.2, 131.2, 128.6, 128.4, 128.3, 128.0, 127.4, 126.29, 126.27, 123.9, 123.4, 123.3, 66.8, 57.0, 54.3, 42.4, 34.5.

**HRMS** (ESI-TOF) (*m/z*): Calcd for C<sub>25</sub>H<sub>26</sub>NOS ([M+H]<sup>+</sup>), 388.1730, found 388.1724.

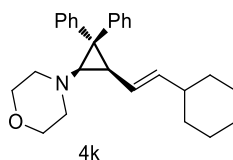

**4-((1R, 3R)-3-((E)-2-cyclohexylvinyl)-2,2-diphenylcyclopropyl)morpholine (4k)**: following the general procedure (II), the reaction of 3,3-diphenyl cyclopropene (0.2 mmol, 38.4 mg), (*E*)-2-(2-cyclohexylvinyl)-5,5-dimethyl-1,3,2-dioxaborinane (0.30 mmol, 66.9 mg) and morpholino benzoate (0.30 mmol, 62.9 mg) afforded product **4k** (48.8 mg, 63% yield, 96% ee) as a colorless oil.

$[\alpha]_D^{12} = 60.3$  ( $c = 1.0$ ,  $\text{CHCl}_3$ ) for 96% ee.

**$^1\text{H NMR}$**  (600 MHz,  $\text{CDCl}_3$ )  $\delta$  7.33 (d,  $J = 7.8$  Hz, 2H), 7.20-7.00 (m, , 8H), 5.55 (dd,  $J = 15.6$ , 6.6 Hz, 1H), 5.18 (dd,  $J = 15.6$ , 10.2 Hz, 1H), 3.64-3.52 (m, 4H), 2.66 (s, 2H), 2.62 – 2.55 (m, 2H), 2.35 (d,  $J = 7.8$  Hz, 1H), 2.22 (t,  $J = 9.6$  Hz, 1H), 1.91 – 1.84 (m, 1H), 1.66 – 1.50 (m, 6H), 1.22 – 1.12 (m, 2H), 1.10 – 1.02 (m, 1H), 0.96 (dt,  $J = 16.2$ , 8.6 Hz, 2H).

**$^{13}\text{C NMR}$**  (150 MHz,  $\text{CDCl}_3$ )  $\delta$  147.3, 139.6, 137.7, 131.3, 128.35, 128.34, 127.6, 125.89, 125.83, 124.7, 66.7, 56.4, 54.2, 40.7, 40.4, 33.8, 33.12, 33.09, 26.2, 26.0.

**HRMS** (ESI-TOF) ( $m/z$ ): Calcd for  $\text{C}_{27}\text{H}_{34}\text{NO}$  ( $[\text{M}+\text{H}]^+$ ), 388.2635, found 388.2630.

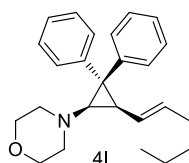

**4-((1R, 3R)-3-((E)-hex-1-en-1-yl)-2,2-diphenylcyclopropyl)morpholine (4l)**: following the general procedure (II), the reaction of 3,3-diphenyl cyclopropene (0.2 mmol, 38.4 mg), (*E*)-2-(hex-1-en-1-yl)-5,5-dimethyl-1,3,2-dioxaborinane (0.30 mmol, 59 mg) and morpholino benzoate (0.30 mmol, 62.6 mg) afforded product **4l** (58.2 mg, 80% yield, 96% ee) as a colorless oil.

$[\alpha]_D^{12} = 128.4$  ( $c = 1.0$ ,  $\text{CHCl}_3$ ) for 96% ee.

**$^1\text{H NMR}$**  (600 MHz,  $\text{CDCl}_3$ )  $\delta$  7.42 (d,  $J = 7.6$  Hz, 2H), 7.26-7.16 (m, 6H), 7.16-7.10 (m, 2H), 5.72 – 5.62 (m, 1H), 5.31 (dd,  $J = 15.6$ , 10.2 Hz, 1H), 3.72-3.60 (m, 4H), 2.74 (s, 2H), 2.70 – 2.61 (m, 2H), 2.42 (d,  $J = 7.8$  Hz, 1H), 2.32 (t,  $J = 7.2$ , 1H), 2.02 (q,  $J = 6.6$  Hz, 2H), 1.39 – 1.22 (m, 4H), 0.87 (t,  $J = 7.2$  Hz, 3H).

**$^{13}\text{C NMR}$**  (150 MHz,  $\text{CDCl}_3$ )  $\delta$  147.3, 139.7, 131.9, 131.2, 128.43, 128.36, 127.6, 126.9, 125.9, 125.8, 66.7, 56.4, 54.2, 40.4, 33.7, 32.3, 31.6, 22.0, 13.8.

**HRMS** (ESI-TOF) ( $m/z$ ): Calcd for  $\text{C}_{25}\text{H}_{32}\text{NO}$  ( $[\text{M}+\text{H}]^+$ ), 362.2478, found 362.2466.

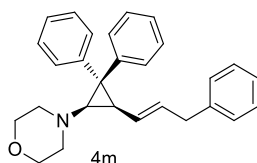

**4-((1R, 3R)-2,2-diphenyl-3-((E)-3-phenylprop-1-en-1-yl)cyclopropyl)morpholine (4m)**:

following the general procedure (II), the reaction of 3,3-diphenyl cyclopropene (0.2 mmol, 38.4 mg), (*E*)-5,5-dimethyl-2-(3-phenylprop-1-en-1-yl)-1,3,2-dioxaborinane (0.30 mmol, 69.2mg) and morpholino benzoate (0.30 mmol, 62.9 mg) afforded product **4m** (55.6 mg, 70% yield, 94% ee) as a yellow oil.

$[\alpha]_D^{12} = 40.1$  ( $c = 1.0$ ,  $\text{CHCl}_3$ ) for 94% ee.

$^1\text{H NMR}$  (600 MHz,  $\text{CDCl}_3$ )  $\delta$  7.33 (d,  $J = 7.8$  Hz, 2H), 7.25-7.00 (m, 15H), 5.80 – 5.70 (m, 1H), 5.32 (dd,  $J = 15.6, 10.2$  Hz, 1H), 3.60-3.54 (m, 4H), 3.26 (d,  $J = 6.6$  Hz, 2H), 2.65 (s, 2H), 2.60 – 2.53 (m, 2H), 2.36 (d,  $J = 7.8$  Hz, 1H), 2.30 – 2.24 (m, 1H).

$^{13}\text{C NMR}$  (150 MHz,  $\text{CDCl}_3$ )  $\delta$  147.1, 130.8, 139.6, 131.2, 130.3, 128.6, 128.45, 128.44, 128.38, 128.32, 127.7, 126.0, 125.9, 66.7, 56.6, 54.2, 40.8, 39.4, 33.4.

**HRMS** (ESI-TOF) ( $m/z$ ): Calcd for  $\text{C}_{28}\text{H}_{30}\text{NO}$  ( $[\text{M}+\text{H}]^+$ ), 396.2322, found 396.2307.

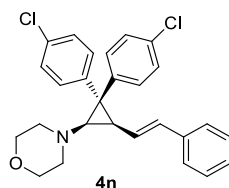

**4-((1R,3R)-2-bis(4-chlorophenyl)-3-((*E*)-styryl)cyclopropyl)morpholine (**4n**):** following the general procedure (II), the reaction of 3,3-di(4-chlorophenyl) cyclopropene (0.2 mmol, 52.3 mg), (*E*)-5,5-dimethyl-2-styryl-1,3,2-dioxaborinane (0.30 mmol, 65 mg) and morpholino benzoate (0.30 mmol, 62.1 mg) afforded product **4n** (60.0 mg, 66% yield, 95% ee) as a white solid.

m.p. 63-64 °C

$[\alpha]_D^{19} = 109.5$  ( $c = 1.0$ ,  $\text{CHCl}_3$ ) for 95% ee.

$^1\text{H NMR}$  (600 MHz,  $\text{CDCl}_3$ )  $\delta$  7.40-7.33 (m, 2H), 7.33-7.18 (m, 9H), 7.16-7.10 (m, 2H), 6.64 (d,  $J = 16.2$  Hz, 1H), 6.05 (dd,  $J = 16.2, 10.2$  Hz, 1H), 3.73-3.57 (m, 4H), 2.84-2.70 (m, 2H), 2.70-2.60 (m, 2H), 2.56 (d,  $J = 7.8$  Hz, 1H), 2.46 (dd,  $J = 10.2, 7.8$  Hz, 1H);

$^{13}\text{C NMR}$  (150 MHz,  $\text{CDCl}_3$ )  $\delta$  144.8, 137.46, 137.41, 132.4, 132.3, 132.2, 131.1, 129.6, 128.7, 128.6, 128.2, 127.1, 126.9, 125.8, 66.6, 57.0, 54.2, 40.8, 34.6;

**HRMS** (ESI-TOF) ( $m/z$ ): Calcd for  $\text{C}_{27}\text{H}_{26}\text{Cl}_2\text{NO}$  ( $[\text{M}+\text{H}]^+$ ), 450.1386, found 450.1388.

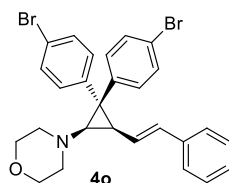

**4-((1R,3R)-2-bis(4-bromophenyl)-3-((*E*)-styryl)cyclopropyl)morpholine (**4o**):** following the general procedure (II), the reaction of 3,3-di(4-bromophenyl) cyclopropene (0.20 mmol, 70.3 mg), (*E*)-5,5-dimethyl-2-styryl-1,3,2-dioxaborinane (0.30 mmol, 65.3 mg) and morpholino benzoate (0.30 mmol, 62.1 mg) afforded product **4o** (99.2 mg, 92% yield, 97% ee) as a colorless oil.

$[\alpha]_D^{17} = 215.2$  ( $c = 1.0$ ,  $\text{CHCl}_3$ ) for 97% ee.

$^1\text{H NMR}$  (600 MHz,  $\text{CDCl}_3$ )  $\delta$  7.44-7.36 (m, 4H), 7.34-7.17 (m, 7H), 7.10-7.04 (m, 2H), 6.64 (d,  $J = 16.2$  Hz, 1H), 6.04 (dd,  $J = 16.2, 10.2$  Hz, 1H), 3.72-3.60 (m, broad, 4H), 2.80-2.70 (m, 2H), 2.70-2.62 (m, 2H), 2.55 (d,  $J = 7.8$  Hz, 1H), 2.46 (dd,  $J = 10.2, 7.8$  Hz, 1H);

$^{13}\text{C NMR}$  (150 MHz,  $\text{CDCl}_3$ )  $\delta$  145.3, 137.9, 137.4, 132.8, 131.7, 131.21, 131.16, 130.0, 128.6,

127.1, 126.8, 125.8, 120.5, 120.3, 66.6, 57.0, 54.2, 40.9, 34.6;

**HRMS** (ESI-TOF) ( $m/z$ ): Calcd for  $C_{27}H_{26}Br_2NO$  ( $[M+H]^+$ ), 538.0376, found 538.0373.

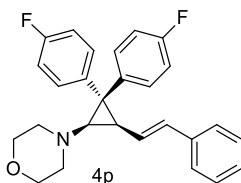

**4-((1R, 3R)-2, 2-bis(4-fluorophenyl)-3-((E)-styryl)cyclopropyl)morpholine (4p)**: following the general procedure (II), the reaction of 4,4'-(cycloprop-2-ene-1,1-diyl)bis(fluorobenzene) (0.2 mmol, 45.6 mg), (*E*)-5,5-dimethyl-2-styryl-1,3,2-dioxaborinane (0.30 mmol, 64.2 mg) and morpholino benzoate (0.30 mmol, 62.3 mg) afforded product **4p** (65.1 mg, 76% yield, 96% ee) as a colorless oil.

$[\alpha]_D^{19} = 292.6$  ( $c = 1.0$ ,  $CHCl_3$ ) for 96% ee.

**$^1H$  NMR** (600 MHz,  $CDCl_3$ )  $\delta$  7.41 – 7.37 (m, 2H), 7.32 – 7.24 (m, 4H), 7.22 – 7.15 (m, 3H), 7.01-6.91 (m, 4H), 6.63 (d,  $J = 16.2$  Hz, 1H), 6.06 (dd,  $J = 16.2, 10.2$  Hz, 1H), 3.73-3.58 (m, 4H), 2.85-2.72 (m, 2H), 2.71 – 2.62 (m, 2H), 2.55 (d,  $J = 8.4$  Hz, 1H), 2.45 (dd,  $J = 10.2, 8.4$  Hz, 1H).

**$^{13}C$  NMR** (150 MHz,  $CDCl_3$ )  $\delta$  162.1 (d,  $J = 13.1$  Hz, 1C), 160.4 (d,  $J = 13.1$  Hz, 1C), 142.54 (d,  $J = 3.2$  Hz, 1C), 137.6, 135.0 (d,  $J = 3.2$  Hz, 1C), 132.5 (d,  $J = 7.7$  Hz, 1C), 130.86, 129.8 (d,  $J = 7.7$  Hz, 1C), 128.6, 127.4, 127.0, 125.8, 115.4 (d,  $J = 21.3$  Hz, 1C), 114.9 (d,  $J = 21.3$  Hz, 1C), 66.7, 57.0, 54.3, 40.7, 34.4.

**$^{19}F$  NMR** (470 MHz,  $CDCl_3$ )  $\delta$  -116.3 (s), -116.4 (s).

**HRMS** (ESI-TOF) ( $m/z$ ): Calcd for  $C_{27}H_{26}F_2NO$  ( $[M+H]^+$ ), 418.1977, found 418.1967.

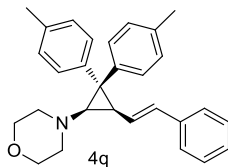

**4-((1R, 3R)-3-((E)-styryl)-2,2-di-*p*-tolylcyclopropyl)morpholine (4q)**: following the general procedure (II), the reaction of 4,4'-(cycloprop-2-ene-1,1-diyl)bis(methylbenzene) (0.20 mmol, 44.2 mg), (*E*)-5,5-dimethyl-2-styryl-1,3,2-dioxaborinane (0.30 mmol, 65.9 mg) and morpholino benzoate (0.30 mmol, 62.4 mg) afforded product **4q** (42.5 mg, 52% yield, 97% ee) as a colorless oil.

$[\alpha]_D^{17} = 332.5$  ( $c = 1.0$ ,  $CHCl_3$ ) for 97% ee.

**$^1H$  NMR** (600 MHz,  $CDCl_3$ )  $\delta$  7.33 (d,  $J = 8.4$  Hz, 2H), 7.27 (d,  $J = 16.2$  Hz, 4H), 7.20 – 7.15 (m, 1H), 7.14 – 7.10 (m, 2H), 7.08 – 7.00 (m, 4H), 6.60 (d,  $J = 16.2$  Hz, 1H), 6.15 (dd,  $J = 16.0, 10.2$  Hz, 1H), 3.68 – 3.58 (m, 4H), 2.85-2.72 (m, 2H), 2.70 – 2.60 (m, 2H), 2.56 (d,  $J = 7.8$  Hz, 1H), 2.43 (dd,  $J = 10.2, 7.8$  Hz, 1H), 2.28 (d,  $J = 7.8$  Hz, 6H).

**$^{13}C$  NMR** (150 MHz,  $CDCl_3$ )  $\delta$  144.4, 138.0, 136.4, 135.6, 135.5, 131.0, 129.9, 129.1, 128.7, 128.6, 128.5, 128.1, 125.8, 66.7, 57.1, 54.3, 41.6, 34.5, 21.0, 20.9.

**HRMS** (ESI-TOF) ( $m/z$ ): Calcd for  $C_{29}H_{31}NO$  ( $[M+H]^+$ ), 410.2478, found 410.2480.

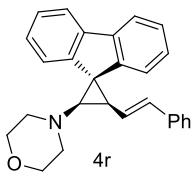

**4-((2R,3R)-2-((E)-styryl)spiro[cyclopropane-1,9'-fluoren]-3-yl)morpholine (4r):**

following the general procedure (II), the reaction of spiro[cycloprop[2]ene-1,9'-fluorene (0.20 mmol, 38.1 mg), (*E*)-5,5-dimethyl-2-styryl-1,3,2-dioxaborinane (0.30 mmol, 65.9 mg) and morpholino benzoate (0.30 mmol, 62.3 mg) afforded product **4r** (28.5 mg, 38% yield, 86% ee) as a yellow oil.

$[\alpha]_D^{17} = 224.2$  ( $c = 1.0$ ,  $\text{CHCl}_3$ ) for 86% ee.

**$^1\text{H}$  NMR** (600 MHz,  $\text{CDCl}_3$ )  $\delta$  7.88 (d,  $J = 7.8$  Hz, 1H), 7.75 (dd,  $J = 19.2, 7.2$  Hz, 2H), 7.34 – 7.15 (m, 8H), 7.11 (t,  $J = 7.2$  Hz, 1H), 6.98 (d,  $J = 7.2$  Hz, 1H), 6.77 (dd,  $J = 15.6, 9.6$  Hz, 1H), 6.47 (d,  $J = 15.9$  Hz, 1H), 3.64 (m, 4H), 3.04 (d,  $J = 7.2$  Hz, 1H), 2.90 – 2.80 (m, 1H), 2.75 (dd,  $J = 10.2, 7.2$  Hz, 1H), 2.60 – 2.05 (m, 3H).

**$^{13}\text{C}$  NMR** (150 MHz,  $\text{CDCl}_3$ )  $\delta$  146.9, 141.3, 141.2, 139.3, 137.5, 133.9, 128.5, 127.1, 127.0, 126.5, 126.22, 126.17, 125.9, 125.1, 123.6, 119.9, 119.6, 118.5, 66.9, 57.3, 53.0, 41.3, 39.4.

**HRMS** (ESI-TOF) ( $m/z$ ): Calcd for  $\text{C}_{27}\text{H}_{26}\text{NO}$  ( $[\text{M}+\text{H}]^+$ ), 380.2009; found 380.2010.

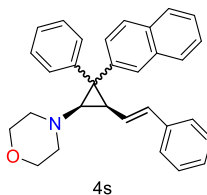

**4-((1R,2S,3R)-2-(naphthalen-2-yl)-2-phenyl-3-((E)-styryl)cyclopropyl)morpholine (4s):**

following the general procedure (II), the reaction of 2-(1-phenylcycloprop-2-en-1-yl)naphthalene (0.2 mmol, 48.4 mg), (*E*)-5,5-dimethyl-2-styryl-1,3,2-dioxaborinane (0.30 mmol, 65.2 mg) and 1,4-dioxo-8-azaspiro[4.5]decan-8-yl benzoate (0.30 mmol, 63.3mg) afforded product **4s** (53.5 mg, 62% yield, 1.7:1 dr.; major isomer: 96% ee; minor isomer: 91% ee) as a colorless oil.

$[\alpha]_D^{17} = 186.4$  ( $c = 1.0$ ,  $\text{CHCl}_3$ ) for a mixture of diastereomers with 1.7:1 dr.

**$^1\text{H}$  NMR** (600 MHz,  $\text{CDCl}_3$ )  $\delta$  (the signals of both isomers were assigned together due to their inseparability and signal overlap) 7.99 (s, 0.5H), 7.85 – 7.67 (m, 3.5H), 7.60-7.50 (m, 1.5H), 7.46 – 7.35 (m, 2.5H), 7.33 – 7.21 (m, 7H), 7.21 – 7.13 (m, 2H), 7.01 – 6.92 (m, 1H), 6.68 (dd,  $J = 15.6, 3.6$  Hz, 1H), 6.30-6.10 (m, 1H), 3.87 – 3.57 (m, 4H), 2.86 (s, 2H), 2.76 – 2.67 (m, 3H), 2.65-2.50 (m, 1H).

**$^{13}\text{C}$  NMR** (150 MHz,  $\text{CDCl}_3$ )  $\delta$  (the signals of both isomers were assigned together due to their inseparability) 146.7, 144.3, 139.3, 137.83, 137.80, 136.8, 133.4, 133.3, 132.0, 131.2, 130.4, 130.3, 130.0, 128.6, 128.5, 128.34, 128.30, 128.25, 128.1, 128.0, 127.9, 127.6, 127.5, 127.4, 127.31, 127.27, 126.84, 126.81, 126.5, 126.2, 126.1, 125.84, 125.82, 125.76, 125.67, 125.74, 66.74, 66.69, 57.2, 57.0, 54.4, 54.3, 42.4, 42.3, 34.8, 34.4.

**HRMS** (ESI-TOF) ( $m/z$ ): Calcd for  $\text{C}_{31}\text{H}_{30}\text{NO}$  ( $[\text{M}+\text{H}]^+$ ), 432.2322, found 432.2332.

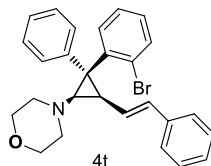

**4-((1R, 2S, 3R)-2-(2-bromophenyl)-2-phenyl-3-((E)-styryl)cyclopropyl)morpholine (4t):**

following the general procedure (II), the reaction of 1-bromo-2-(1-phenylcycloprop-2-en-1-yl)benzene (0.2 mmol, 54.3 mg), (*E*)-5,5-dimethyl-2-styryl-1,3,2-dioxaborinane (0.30 mmol, 64.8 mg) and morpholino benzoate (0.30 mmol, 62.1 mg) afforded product **4t** (73.5mg, 80% yield, 98% ee) as a white solid.

m.p. 68-69 °C

$[\alpha]_D^{13} = 740.3$  ( $c = 1.0$ ,  $\text{CHCl}_3$ ) for 98% ee.

**$^1\text{H NMR}$**  (600 MHz,  $\text{CDCl}_3$ )  $\delta$  7.57 (d,  $J = 7.2$  Hz, 1H), 7.43 (d,  $J = 7.8$  Hz, 1H), 7.28 (t,  $J = 7.8$  Hz, 1H), 7.15 (dd,  $J = 16.2, 7.8$  Hz, 4H), 7.10-7.02 (m, 5H), 6.94 (d,  $J = 7.2$  Hz, 2H), 6.57 (d,  $J = 16.2$  Hz, 1H), 5.57 (dd,  $J = 16.2, 10.2$  Hz, 3.61 (s, 4H), 2.84-2.80 (m, 1H), 2.79-2.68 (m, 2H), 2.68-2.55 (m, 2H), 2.26 (d,  $J = 7.8$  Hz, 1H).

**$^{13}\text{C NMR}$**  (150 MHz,  $\text{CDCl}_3$ )  $\delta$  144.4, 138.2, 137.8, 134.2, 132.7, 131.9, 128.43, 128.38, 128.34, 128.1, 126.7, 126.6, 126.1, 126.0, 125.8, 125.6, 66.7, 60.7, 55.0, 41.4, 34.5.

**HRMS** (ESI-TOF) ( $m/z$ ): Calcd for  $\text{C}_{27}\text{H}_{27}\text{BrNO}$  ( $[\text{M}+\text{H}]^+$ ), 460.1271, found 460.1263.

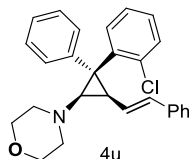

**4-((1R, 2S, 3R)-2-(2-chlorophenyl)-2-phenyl-3-((E)-styryl)cyclopropyl)morpholine (4u):**

following the general procedure (II), the reaction of 1-chloro-2-(1-phenylcycloprop-2-en-1-yl)benzene (0.2 mmol, 45.3 mg), (*E*)-5,5-dimethyl-2-styryl-1,3,2-dioxaborinane (0.30 mmol, 65 mg) and morpholino benzoate (0.30 mmol, 62.3 mg) afforded product **4u** (53.2 mg, 64% yield, 95% ee) as a colorless oil.

$[\alpha]_D^{12} = 227.7$  ( $c = 1.0$ ,  $\text{CHCl}_3$ ) for 95% ee

**$^1\text{H NMR}$**  (600 MHz,  $\text{CDCl}_3$ )  $\delta$  7.68 – 7.65 (m, 1H), 7.30 (dd,  $J = 7.2, 4.8$  Hz, 2H), 7.26 – 7.18 (m, 5H), 7.14 (dd,  $J = 10.6, 7.8$  Hz, 4H), 7.06 (d,  $J = 7.8$  Hz, 2H), 6.64 (d,  $J = 16.2$  Hz, 1H), 5.72 (dd,  $J = 16.2, 10.2$  Hz, 1H), 3.68 (s, 4H), 2.88 – 2.77 (m, 3H), 2.75-2.65 (m, 2H), 2.40 (d,  $J = 8.4$  Hz, 1H).

**$^{13}\text{C NMR}$**  (150 MHz,  $\text{CDCl}_3$ )  $\delta$  144.4, 137.9, 137.4, 136.8, 132.4, 131.5, 130.6, 128.5, 128.2, 128.1, 126.8, 126.4, 126.3, 126.0, 125.8, 125.7, 66.7, 59.7, 55.0, 40.1, 34.4.

**HRMS** (ESI-TOF) ( $m/z$ ): Calcd for  $\text{C}_{27}\text{H}_{27}\text{ClNO}$  ( $[\text{M}+\text{H}]^+$ ), 416.1776 found 416.1771.

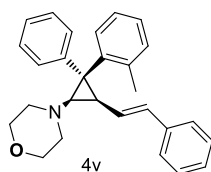

**4-((1R, 2S, 3R)-2-phenyl-3-((E)-styryl)-2-(o-tolyl)cyclopropyl)morpholine (4v):** following the general procedure (II), the reaction of 1-methyl-2-(1-phenylcycloprop-2-en-1-yl)benzene

(0.2 mmol, 41.2 mg), (*E*)-5,5-dimethyl-2-styryl-1,3,2-dioxaborinane (0.30 mmol, 64.7 mg) and morpholino benzoate (0.30 mmol, 62.1 mg) afforded product **4v** (45.9 mg, 58% yield, 90% ee) as a colorless oil.

$[\alpha]_D^{12} = 375.9$  ( $c = 1.0$ ,  $\text{CHCl}_3$ ) for 90% ee.

**<sup>1</sup>H NMR** (600 MHz,  $\text{CDCl}_3$ )  $\delta$  7.47 (d,  $J = 6.6$  Hz, 1H), 7.13 (dd,  $J = 12.6, 7.2$  Hz, 6H), 7.05 (dd,  $J = 12.6, 6.6$  Hz, 2H), 7.00 (d,  $J = 7.2$  Hz, 2H), 6.90 (d,  $J = 7.8$  Hz, 2H), 6.53 (d,  $J = 16.2$  Hz, 1H), 5.61 (dd,  $J = 16.2, 10.2$  Hz, 1H), 3.70-3.53 (m, 4H), 2.74 (m, 3H), 2.62-2.58 (m, 2H), 2.20 (d,  $J = 7.2$  Hz, 1H), 1.84 (s, 3H).

**<sup>13</sup>C NMR** (150 MHz,  $\text{CDCl}_3$ )  $\delta$  145.3, 140.0, 137.7, 136.8, 131.1, 130.9, 130.8, 128.5, 128.2, 127.3, 126.9, 126.8, 125.8, 125.6, 125.5, 125.0, 66.7, 61.0, 55.1, 40.0, 34.0, 20.7.

**HRMS** (ESI-TOF) ( $m/z$ ): Calcd for  $\text{C}_{28}\text{H}_{30}\text{NO}$  ( $[\text{M}+\text{H}]^+$ ), 396.2322, found 396.2325.

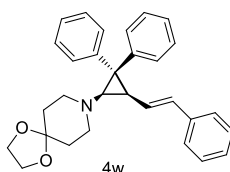

**8-((1*R*, 3*R*)-2,2-diphenyl-3-((*E*)-styryl)cyclopropyl)-1,4-dioxo-8-azaspiro[4.5]decane (**4w**):** following the general procedure (II), the reaction of 3,3-diphenylcyclopropene (0.2 mmol, 38.4 mg), (*E*)-5,5-dimethyl-2-styryl-1,3,2-dioxaborinane (0.30 mmol, 65.2 mg) and 1,4-dioxo-8-azaspiro[4.5]decan-8-yl benzoate (0.30 mmol, 89 mg) afforded product **4w** (59.4 mg, 68% yield, 97% ee) as a colorless oil.

$[\alpha]_D^{17} = 194.9$  ( $c = 1.0$ ,  $\text{CHCl}_3$ ) for 97% ee.

**<sup>1</sup>H NMR** (600 MHz,  $\text{CDCl}_3$ )  $\delta$  7.50-7.44 (m, 2H), 7.31-7.20 (m, 10H), 7.20-7.12 (m, 3H), 6.62 (d,  $J = 16.2$  Hz, 1H), 6.14 (dd,  $J = 16.2, 10.2$  Hz, 1H), 3.93 (s, 4H), 3.03-2.79 (m, broad, 2H), 2.79-2.68 (m, broad, 2H), 2.65 (d,  $J = 7.8$  Hz, 1H), 2.50 (dd,  $J = 10.2, 7.8$  Hz, 1H), 1.75-1.65 (m, 4H);

**<sup>13</sup>C NMR** (150 MHz,  $\text{CDCl}_3$ )  $\delta$  147.1, 139.5, 137.9, 131.1, 130.1, 128.5, 128.43, 128.40, 127.8, 126.7, 126.1, 126.0, 125.8, 107.2, 64.2, 56.7, 51.9, 42.3, 35.0, 34.8;

**HRMS** (ESI-TOF) ( $m/z$ ): Calcd for  $\text{C}_{30}\text{H}_{32}\text{NO}_2$  ( $[\text{M}+\text{H}]^+$ ), 438.2428, found 438.2430.

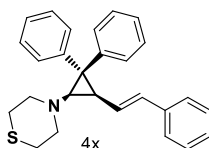

**4-((1*R*, 3*R*)-2,2-diphenyl-3-((*E*)-styryl)cyclopropyl)thiomorpholine (**4x**):** following the general procedure (II), the reaction of 3,3-diphenyl cyclopropene (0.2 mmol, 38.4 mg), (*E*)-5,5-dimethyl-2-styryl-1,3,2-dioxaborinane (0.30 mmol, 65.5 mg) and thiomorpholino benzoate (0.30 mmol, 67.0 mg) afforded product **4x** (67.6 mg, 85% yield, 99% ee) as a colorless oil.

$[\alpha]_D^{19} = 231.8$  ( $c = 1.0$ ,  $\text{CHCl}_3$ ) for 99% ee.

**<sup>1</sup>H NMR** (600 MHz,  $\text{CDCl}_3$ )  $\delta$  7.47-7.40 (m, 2H), 7.31-7.22 (m, 10H), 7.21-7.13 (m, 3H), 6.62 (d,  $J = 16.2$  Hz, 1H), 6.09 (dd,  $J = 16.2, 10.2$  Hz, 1H), 3.13-3.00 (m, 2H), 3.00-2.87 (m, 2H), 2.70 (d,  $J = 7.8$  Hz, 1H), 2.68-2.57 (m, 4H), 2.51 (dd,  $J = 10.2, 7.8$  Hz, 1H);

**<sup>13</sup>C NMR** (150 MHz,  $\text{CDCl}_3$ )  $\delta$  146.9, 139.3, 137.8, 131.2, 130.3, 128.6, 128.5, 128.4, 128.0, 127.9, 126.8, 126.2, 126.1, 125.8, 57.5, 55.9, 42.2, 34.8, 27.6;

**HRMS** (ESI-TOF) ( $m/z$ ): Calcd for  $\text{C}_{27}\text{H}_{28}\text{NS}$  ( $[\text{M}+\text{H}]^+$ ), 398.1937, found 398.1940.

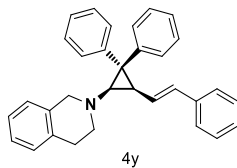

**2-((1R, 3R)-2, 2-diphenyl-3-((E)-styryl)cyclopropyl)-1,2,3,4-tetrahydroisoquinoline (4y):** following the general procedure (II), the reaction of 3,3-diphenyl cyclopropene (0.2 mmol, 38.4 mg), (*E*)-5,5-dimethyl-2-styryl-1,3,2-dioxaborinane (0.30 mmol, 64.9 mg) and 3,4-dihydroisoquinolin-2(1*H*)-yl benzoate (0.30 mmol, 75.3 mg) afforded product **4y** (58.7 mg, 68% yield, 94% ee) as a yellow oil

$[\alpha]_D^{19} = 57.8$  ( $c = 1.0$ ,  $\text{CHCl}_3$ ) for 94% ee.

**$^1\text{H NMR}$**  (600 MHz,  $\text{CDCl}_3$ )  $\delta$  7.83-7.47 (m, 2H), 7.35-7.19 (m, 10H), 7.19-7.05 (m, 6H), 7.01-6.95 (m, 1H), 6.67 (d,  $J = 15.6$  Hz, 1H), 6.17 (dd,  $J = 16.2, 10.2$  Hz, 1H), 3.94-3.80 (m, 2H), 3.35-3.16 (m, 1H), 2.98-2.87 (m, 2H), 2.87-2.80 (m, 1H), 2.78 (d,  $J = 7.8$  Hz, 1H), 2.58 (dd,  $J = 10.2, 7.8$  Hz, 1H);

**$^{13}\text{C NMR}$**  (150 MHz,  $\text{CDCl}_3$ )  $\delta$  147.1, 139.4, 137.9, 135.0, 134.5, 131.2, 130.3, 128.6, 128.5, 128.5, 128.4, 127.9, 126.7, 126.6, 126.1, 126.0, 125.9, 125.6, 56.9, 56.2, 52.0, 42.3, 35.0, 28.8.

**HRMS** (ESI-TOF) ( $m/z$ ): Calcd for  $\text{C}_{31}\text{H}_{30}\text{N}$  ( $[\text{M}+\text{H}]^+$ ), 428.2373, found 428.2378.

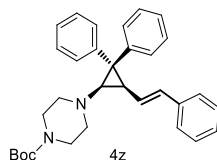

**tert-Butyl 4-((1R,3R)-2,2-diphenyl-3-((E)-styryl)cyclopropyl)piperazine-1-carboxylate (4z):** following the general procedure (II), the reaction of 3,3-diphenyl cyclopropene (0.20 mmol, 38.4 mg), (*E*)-5,5-dimethyl-2-styryl-1,3,2-dioxaborinane (0.3 mmol, 65.2 mg) and *tert*-butyl 4-(benzoyloxy)piperazine-1-carboxylate (0.3 mmol, 90.8 mg) afforded product **4z** (76.6 mg, 80% yield, 90% ee) as a yellow oil.

$[\alpha]_D^{17} = 124.2$  ( $c = 1.0$ ,  $\text{CHCl}_3$ ) for 90% ee.

**$^1\text{H NMR}$**  (600 MHz,  $\text{CDCl}_3$ )  $\delta$  7.49-7.20 (m, 2H), 7.33-7.21 (m, 10H), 7.21-7.13 (m, 3H), 6.63 (dd,  $J = 16.2$  Hz, 1H), 6.13 (dd,  $J = 16.2, 10.2$  Hz, 1H), 3.54-3.27 (m, broad, 4H), 2.85-2.65 (m, broad, 2H), 2.65-2.57 (m, 3H), 2.50 (dd,  $J = 10.2, 7.8$  Hz, 1H), 1.44 (s, 9 H);

**$^{13}\text{C NMR}$**  (150 MHz,  $\text{CDCl}_3$ )  $\delta$  154.9, 146.9, 139.2, 137.8, 131.2, 130.3, 128.6, 128.5, 128.3, 128.2, 127.9, 126.8, 126.18, 126.15, 125.8, 79.5, 56.7, 53.5, 42.3, 34.7, 29.7, 28.4;

**HRMS** (ESI-TOF) ( $m/z$ ): Calcd for  $\text{C}_{32}\text{H}_{37}\text{N}_2\text{O}_2$  ( $[\text{M}+\text{H}]^+$ ), 481.2850, found 481.2856.

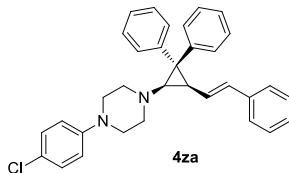

**1-(4-Chlorophenyl)-4-((1R, 3R)-2,2-diphenyl-3-((E)-styryl)cyclopropyl)piperazine (4za):** following the general procedure (II), the reaction of 3,3-diphenyl cyclopropene (0.2 mmol, 38.4 mg), (*E*)-5,5-dimethyl-2-styryl-1,3,2-dioxaborinane (0.30 mmol, 64.8 mg) and 4-(4-chlorophenyl)piperazine-1-yl benzoate (0.30 mmol, 94.8 mg) afforded product **4za** (81.3 mg, 83% yield, 97% ee) as a colorless oil.



$[\alpha]_D^{12} = 225.3$  ( $c = 1.0$ ,  $\text{CHCl}_3$ ) for 97% ee.

**$^1\text{H NMR}$**  (600 MHz,  $\text{CDCl}_3$ )  $\delta$  7.47 (d,  $J = 7.2$  Hz, 2H), 7.33 – 7.22 (m, 10H), 7.22 – 7.12 (m, 5H), 6.78 (d,  $J = 9.0$  Hz, 2H), 6.64 (d,  $J = 15.6$  Hz, 1H), 6.15 (dd,  $J = 16.2, 10.2$  Hz, 1H), 3.15 – 3.03 (m, 4H), 2.95 (s, 2H), 2.85–2.78 (m, 2H), 2.66 (d,  $J = 7.8$  Hz, 1H), 2.52 (dd,  $J = 10.2, 7.8$  Hz, 1H).

**$^{13}\text{C NMR}$**  (150 MHz,  $\text{CDCl}_3$ )  $\delta$  149.9, 146.9, 139.3, 137.8, 131.2, 130.2, 128.8, 128.6, 128.5, 128.27, 128.25, 127.9, 126.8, 126.19, 125.16, 124.8, 124.3, 116.9, 56.6, 53.5, 48.7, 42.3, 34.7.

**HRMS** (ESI-TOF) ( $m/z$ ): Calcd for  $\text{C}_{33}\text{H}_{32}\text{ClN}_2$  ( $[\text{M}+\text{H}]^+$ ), 491.2249, found 491.2219.

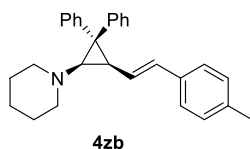

**1-((1R,3R)-3-((E)-4-methylstyryl)-2,2-diphenylcyclopropyl)piperidine (4zb)**: following the general procedure (II), the reaction of 3,3-diphenyl cyclopropene (0.2 mmol, 38.4 mg), (*E*)-5,5-dimethyl-2-(4-methylstyryl)-1,3,2-dioxaborinane (0.30 mmol, 69 mg) and piperidin-1-yl benzoate (0.30 mmol, 61.6 mg) afforded product **4zc** (69.2 mg, 88% yield, 98% ee) as a colorless oil.

$[\alpha]_D^{25} = 123.4$  ( $c = 1.0$ ,  $\text{CHCl}_3$ ) for 98% ee.

**$^1\text{H NMR}$**  (400 MHz,  $\text{CDCl}_3$ )  $\delta$  7.52–7.44 (m, 2H), 7.30–7.18 (m, 6 H), 7.18–7.10 (m, 4 H), 7.10–7.02 (m, 2H), 5.57 (d,  $J = 16.0$  Hz, 1H), 6.07 (dd,  $J = 16.0, 9.6$  Hz, 1H), 2.80–2.64 (m, 2H), 2.64–2.54 (m, 2H), 2.54–2.43 (m, 2H), 2.30 (s, 3H), 1.60–1.48 (m, 4H), 1.48–1.38 (m, 2H);

**$^{13}\text{C NMR}$**  (100 MHz,  $\text{CDCl}_3$ )  $\delta$  147.5, 140.0, 136.3, 135.4, 131.3, 129.7, 129.2, 128.6, 128.4, 127.8, 127.7, 125.9, 125.83, 125.75, 58.1, 55.3, 41.9, 34.8, 25.7, 24.5, 21.1;

**HRMS** (ESI-TOF) ( $m/z$ ): Calcd for  $\text{C}_{29}\text{H}_{32}\text{N}^+$  ( $[\text{M}+\text{H}]^+$ ), 394.2529, found 394.2527.

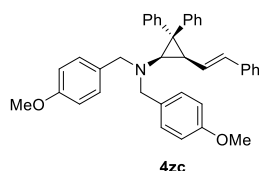

**(1R, 3R)-N,N-bis(4-methoxybenzyl)-2, 2-diphenyl-3-((E)-styryl)cyclopropanamine (4zc)**: following the general procedure (II), the reaction of 3,3-diphenyl cyclopropene (0.2 mmol, 38.4 mg), (*E*)-5,5-dimethyl-2-styryl-1,3,2-dioxaborinane (0.30 mmol, 65.4 mg) and *O*-benzoyl-*N,N*-bis(4-methoxybenzyl)hydroxylamine (0.30 mmol, 113.3 mg) afforded product **4zc** (82.8 mg, 75% yield, 90% ee) as a colorless oil.

$[\alpha]_D^{13} = 47.3$  ( $c = 1.0$ ,  $\text{CHCl}_3$ ) for 90% ee.

**$^1\text{H NMR}$**  (600 MHz,  $\text{CDCl}_3$ )  $\delta$  7.48 – 7.43 (m, 2H), 7.22 (d,  $J = 7.2$  Hz, 2H), 7.20 – 7.15 (m, 6H), 7.15 – 7.10 (m, 3H), 7.10–7.06 (m, 1H), 7.04 – 6.98 (m, 5H), 6.74 (d,  $J = 8.4$  Hz, 4H), 6.64 (d,  $J = 15.6$  Hz, 1H), 6.22 (dd,  $J = 16.4, 10.2$  Hz, 1H), 3.87 (d,  $J = 14.4$  Hz, 2H), 3.68 (s, 6H), 3.49 (d,  $J = 15.6$  Hz, 2H), 2.73 (d,  $J = 7.8$  Hz, 1H), 2.54 (dd,  $J = 10.2, 7.8$  Hz, 1H).

**$^{13}\text{C NMR}$**  (150 MHz,  $\text{CDCl}_3$ )  $\delta$  158.6, 147.3, 139.1, 137.9, 131.7, 130.7, 129.8, 129.3, 128.9, 128.5, 128.4, 128.1, 128.0, 126.7, 126.2, 126.0, 125.9, 113.4, 55.1, 54.3, 53.8, 43.5, 36.4 .

**HRMS** (ESI-TOF) ( $m/z$ ): Calcd for  $\text{C}_{39}\text{H}_{38}\text{NO}_2$  ( $[\text{M}+\text{H}]^+$ ), 552.2897, found 552.2871.

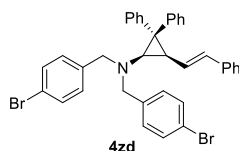

**(1R,3R)-N,N-bis(4-bromobenzyl)-2,2-diphenyl-3-((E)-styryl)cyclopropan-1-amine (4zd):** following the general procedure (II), the reaction of 3,3-diphenyl cyclopropene (0.2 mmol, 38.4 mg), (*E*)-5,5-dimethyl-2-styryl-1,3,2-dioxaborinane (0.30 mmol, 65 mg) and *O*-benzoyl-*N,N*-bis(4-bromobenzyl)hydroxylamine (0.30 mmol, 142.6 mg) afforded product **4zd** (66.8 mg, 51% yield, 95% ee) as a colorless oil.

$[\alpha]_D^{26} = 123.4$  ( $c = 1.0$ ,  $\text{CHCl}_3$ ) for 95% ee.

**$^1\text{H NMR}$**  (400 MHz,  $\text{CDCl}_3$ )  $\delta$  7.60-7.52 (m, 2H), 7.50-7.40 (m, 4H), 7.40-7.24 (m, 12H), 7.22-7.15 (m, 1H), 7.08-6.97 (m, 4H), 6.81 (d,  $J = 16.0$  Hz, 1H), 6.34 (dd,  $J = 16.0, 10.0$  Hz, 1H), 4.04 (s, 1H), 4.00 (s, 1H), 3.64 (s, 1H), 3.60 (s, 1H), 2.91 (d,  $J = 7.6$  Hz, 1H), 2.68 (dd,  $J = 10.0, 7.6$  Hz, 1H);

**$^{13}\text{C NMR}$**  (100 MHz,  $\text{CDCl}_3$ )  $\delta$  147.5, 140.0, 136.3, 135.4, 131.3, 129.7, 129.2, 128.6, 128.4, 127.8, 127.7, 125.9, 125.83, 125.75, 58.1, 55.3, 41.9, 34.8, 25.7, 24.5, 21.1;

**HRMS** (ESI-TOF) ( $m/z$ ): Calcd for  $\text{C}_{37}\text{H}_{32}\text{Br}_2\text{N}^+$  ( $[\text{M}+\text{H}]^+$ ), 648.0896, found 648.0899.

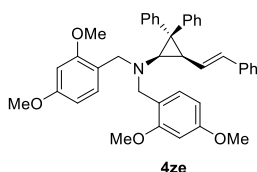

**(1R, 3R)-N, N-bis(2, 4-dimethoxybenzyl)-2, 2-diphenyl-3-((E)-styryl)cyclopropanamine (4ze):** following the general procedure (II), the reaction of 3,3-diphenyl cyclopropene (0.2 mmol, 38.4 mg), (*E*)-5,5-dimethyl-2-styryl-1,3,2-dioxaborinane (0.30 mmol, 65.1 mg) and *O*-benzoyl-*N,N*-bis(2,4-dimethoxybenzyl)hydroxylamine (0.30 mmol, 133.1 mg) afforded product **4ze** (77.1 mg, 63% yield, 92% ee) as a colorless oil.

$[\alpha]_D^{13} = 17.9$  ( $c = 1.0$ ,  $\text{CHCl}_3$ ) for 92% ee.

**$^1\text{H NMR}$**  (600 MHz,  $\text{CDCl}_3$ )  $\delta$  7.49 (d,  $J = 7.2$  Hz, 2H), 7.26-7.02 (m, 14H), 7.04 (d,  $J = 8.4$  Hz, 2H), 6.59 (d,  $J = 16.2$  Hz, 1H), 6.40 – 6.33 (m, 4H), 6.20 (dd,  $J = 16.2, 10.2$  Hz, 1H), 3.88 (d,  $J = 13.8$  Hz, 2H), 3.83 – 3.73 (m, 8H), 3.61 (s, 6H), 2.94 (d,  $J = 7.8$  Hz, 1H), 2.54 (t,  $J = 9.6$  Hz 1H).

**$^{13}\text{C NMR}$**  (150 MHz,  $\text{CDCl}_3$ )  $\delta$  159.5, 158.6, 147.6, 139.2, 138.2, 132.0, 131.2, 129.8, 129.1, 128.4, 128.2, 127.8, 126.4, 126.0, 125.9, 125.7, 118.4, 103.6, 97.7, 55.9, 55.2, 54.8, 49.6, 43.1, 37.4.

**HRMS** (ESI-TOF) ( $m/z$ ): Calcd for  $\text{C}_{41}\text{H}_{42}\text{NO}_4$  ( $[\text{M}+\text{H}]^+$ ), 612.3108, found 612.3094.

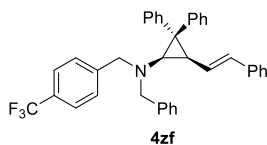

**(1R,3R)-N-benzyl-2,2-diphenyl-3-((E)-styryl)-N-(4-(trifluoromethyl)benzyl)cyclopropan-1-amine (4zf):** following the general procedure (II), the reaction of 3,3-diphenyl cyclopropene (0.2

mmol, 38.4 mg), (*E*)-5,5-dimethyl-2-styryl-1,3,2-dioxaborinane (0.30 mmol, 69.0 mg) and *O*-benzoyl-*N*-benzyl-*N*-(4-(trifluoromethyl)benzyl)hydroxylamine (0.30 mmol, 115.6 mg) afforded product **4zf** (53.9 mg, 48 % yield, 92 % ee) as a colorless oil.

$[\alpha]_D^{26} = 36.6$  ( $c = 1.0$ ,  $\text{CHCl}_3$ ) for 92% ee.

**$^1\text{H NMR}$**  (400 MHz,  $\text{C}_6\text{D}_6$ )  $\delta$  7.62-7.52 (m, 2H), 7.37-7.25 (m, 4H), 7.25-6.92 (m, 19H), 6.64 (d,  $J = 16.0$  Hz, 1H), 6.28 (dd,  $J = 16.0, 10.0$  Hz, 1H), 4.01 (d,  $J = 14.4$  Hz, 1H), 3.93 (d,  $J = 14.4$  Hz, 1H), 3.61 (d,  $J = 14.4$  Hz, 1H), 3.52 (d,  $J = 14.4$  Hz, 1H), 2.92 (d,  $J = 8.0$  Hz, 1H), 2.56 (dd,  $J = 10.0, 8.0$  Hz, 1H);

**$^{13}\text{C NMR}$**  (101 MHz,  $\text{CDCl}_3$ )  $\delta$  147.1, 141.5, 138.9, 137.7, 136.1, 131.7, 130.4, 129.8, 129.6, 129.2 (q,  $^2J_{\text{C-F}} = 32.3$  Hz, 1C), 128.8, 128.6, 128.5, 128.2, 128.0, 127.2, 126.9, 126.5, 126.2, 125.9, 125.0 (q,  $^3J_{\text{C-F}} = 4.0$  Hz, 1C), 124.3 (q,  $^1J_{\text{C-F}} = 272.7$  Hz, 1C), 55.7, 55.3, 53.9, 43.7, 36.5;

**HRMS** (ESI-TOF) ( $m/z$ ): Calcd for  $\text{C}_{38}\text{H}_{33}\text{F}_3\text{N}$  ( $[\text{M}+\text{H}]^+$ ), 560.2560, found 560.2558.

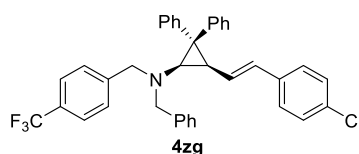

**(1*R*,3*R*)-*N*-benzyl-3-((*E*)-4-chlorostyryl)-2,2-diphenyl-*N*-(4-(trifluoromethyl)benzyl)cyclopropan-1-amine (**4zg**)**: following the general procedure (II), the reaction of 3,3-diphenyl cyclopropene (0.2 mmol, 38.4 mg), (*E*)-2-(4-chlorostyryl)-5,5-dimethyl-1,3,2-dioxaborinane (0.30 mmol, 75.2 mg) and *O*-benzoyl-*N*-benzyl-*N*-(4-(trifluoromethyl)benzyl)hydroxylamine (0.30 mmol, 115.6 mg) afforded product **4zg** (47.5 mg, 40% yield, 99 % ee) as a colorless oil.

$[\alpha]_D^{13} = 33.0$  ( $c = 1.0$ ,  $\text{CHCl}_3$ ) for 99% ee.

**$^1\text{H NMR}$**  (400 MHz,  $\text{C}_6\text{D}_6$ )  $\delta$  7.65-7.52 (m, 4H), 7.40-7.15 (m, 19H), 6.77 (d,  $J = 16.0$  Hz, 1H), 6.35 (dd,  $J = 16.0, 10.0$  Hz, 1H), 4.25-4.00 (m, 2H), 3.81 (d,  $J = 14.4$  Hz, 1H), 3.68 (d,  $J = 14.4$  Hz, 1H), 3.00 (d,  $J = 7.6$  Hz, 1H), 2.71 (dd,  $J = 9.6, 7.6$  Hz, 1H);

**$^{13}\text{C NMR}$**  (100 MHz,  $\text{CDCl}_3$ )  $\delta$  146.9, 141.4, 138.8, 136.2, 136.1, 132.5, 131.6, 130.6, 129.7, 129.6, 129.5, 128.9 (q,  $^2J_{\text{C-F}} = 36.4$  Hz, 1C), 128.7, 128.6, 128.1, 128.0, 127.3, 127.1, 126.5, 126.3, 125.0 (q,  $^3J_{\text{C-F}} = 4$  Hz, 1C), 124.3 (q,  $^1J_{\text{C-F}} = 272.7$  Hz, 1C), 55.9, 55.5, 54.1, 43.9, 36.4;

**HRMS** (ESI-TOF) ( $m/z$ ): Calcd for  $\text{C}_{38}\text{H}_{32}\text{ClF}_3\text{N}$  ( $[\text{M}+\text{H}]^+$ ), 594.2170; found, 594.2172.

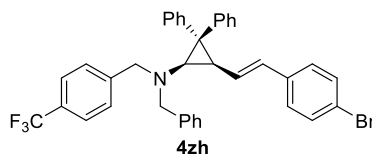

**(1*R*,3*R*)-*N*-benzyl-3-((*E*)-4-bromostyryl)-2,2-diphenyl-*N*-(4-(trifluoromethyl)benzyl)cyclopropan-1-amine (**4zh**)**: following the general procedure (II), the reaction of 3,3-diphenyl cyclopropene (0.2 mmol, 38.4 mg), (*E*)-2-(4-bromostyryl)-5,5-dimethyl-1,3,2-dioxaborinane (0.30 mmol, 88.5 mg) and *O*-benzoyl-*N*-benzyl-*N*-(4-(trifluoromethyl)benzyl)hydroxylamine (0.30 mmol, 115.6 mg) afforded product **4zh** (56.1 mg, 44% yield, 98% ee) as a colorless oil.

$[\alpha]_D^{27} = 22.2$  ( $c = 1.0$ ,  $\text{CHCl}_3$ ) for 98% ee.

**$^1\text{H NMR}$**  (400 MHz,  $\text{CDCl}_3$ )  $\delta$  7.58-7.45 (m, 4H), 7.43-7.34 (m, 2H), 7.34-7.17 (m, 13H), 7.17-7.08 (m, 5H), 6.68 (d,  $J = 16.0$  Hz, 1H), 6.30 (dd,  $J = 16.0, 10.4$  Hz, 1H), 4.06 (d,  $J = 14.4$  Hz,

1H), 4.00 (d,  $J = 14.4$  Hz, 1H), 3.74 (d,  $J = 14.4$  Hz, 1H), 3.60 (d,  $J = 14.4$  Hz, 1H), 2.92 (d,  $J = 8.0$  Hz, 1H), 2.64 (dd,  $J = 10.4, 7.6$  Hz, 1H);

$^{13}\text{C}$  NMR (100 MHz,  $\text{CDCl}_3$ )  $\delta$  146.9, 141.4, 138.8, 136.6, 136.1, 131.7, 131.6, 129.8, 129.7, 129.5, 129.4, 129.1, 128.6, 128.2, 128.0, 127.4, 127.3, 126.5, 126.3, 125.0 (q,  $^3J_{\text{C-F}} = 4$  Hz, 1C), 124.3 (q,  $^1J_{\text{C-F}} = 272.7$  Hz, 1C), 120.6, 55.9, 55.5, 54.1, 43.9, 36.4;

HRMS (ESI-TOF) ( $m/z$ ): Calcd for  $\text{C}_{38}\text{H}_{32}\text{BrF}_3\text{N}([\text{M}+\text{H}]^+)$ , 638.1665; found, 638.1666.

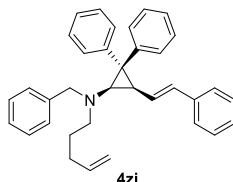

**(1R, 3R)-N-benzyl-N-(pent-4-en-1-yl)-2,2-diphenyl-3-((E)-styryl)cyclopropanamine (4zi):** following the general procedure (II), the reaction of 3,3-diphenyl cyclopropene (0.2 mmol, 38.4 mg), (*E*)-5,5-dimethyl-2-styryl-1,3,2-dioxaborinane (0.30 mmol, 64.8 mg) and *O*-benzoyl-*N*-benzyl-*N*-(pent-4-en-1-yl)hydroxylamine (0.30 mmol, 88.5 mg) afforded product **4zi** (77.7 mg, 82.7% yield, 91% ee) as a yellow oil.

$[\alpha]_{\text{D}}^{25} = 344.8$  ( $c = 1.0$ ,  $\text{CHCl}_3$ ) for 91% ee.

$^1\text{H}$  NMR (600 MHz,  $\text{CDCl}_3$ )  $\delta$  7.51 (d,  $J = 7.2$  Hz, 2H), 7.30 – 7.20 (m, 12H), 7.20-7.16 (m, 2H), 7.16-7.10 (m, 2H), 6.65 (d,  $J = 15.6$  Hz, 1H), 6.27 (dd,  $J = 16.2, 10.2$  Hz, 1H), 5.71-5.62 (m, 1H), 4.97 – 4.77 (m, 2H), 4.05 (d,  $J = 14.4$  Hz, 1H), 3.84 (d,  $J = 13.8$  Hz, 1H), 2.97 (d,  $J = 7.8$  Hz, 1H), 2.79 – 2.69 (m, 1H), 2.67-2.60 (m, 1H), 2.55 (dd,  $J = 10.4, 7.8$  Hz, 1H), 1.87 (q,  $J = 7.2$  Hz, 2H), 1.61 – 1.41 (m, 2H).

$^{13}\text{C}$  NMR (150 MHz,  $\text{CDCl}_3$ )  $\delta$  147.4, 139.3, 138.5, 138.1, 137.9, 131.6, 129.9, 129.06, 129.04, 128.5, 128.4, 128.2, 128.0, 127.9, 126.8, 126.7, 126.2, 126.0, 125.8, 114.4, 57.3, 55.5, 53.1, 43.1, 36.2, 31.6, 24.6.

HRMS (ESI-TOF) ( $m/z$ ): Calcd for  $\text{C}_{35}\text{H}_{36}\text{N}([\text{M}+\text{H}]^+)$ , 470.2842, found 470.2835.

## 5. DFT calculation details

To explore the detailed reaction mechanism of catalyzed by copper, theoretical calculations were performed by Gaussian 16 suite package<sup>4</sup> with density functional theory (DFT). The geometry optimizations of the starting materials, transition states and intermediates of **4t**, **4u** and **4v** were calculated by the M06 functional<sup>5</sup> and the basis sets of 6-31G(d,p)<sup>6</sup> for non-metal atoms and SDD<sup>7</sup> for Cu atom in the gas phase. Harmonic vibrational frequency calculations were carried out to confirm the rationality of all the minima geometries (no imaginary frequency) and transition states structures (only one imaginary frequency) at the same levels of optimizations. The intrinsic reaction coordinate (IRC) calculations were performed to ensure that the located transition states connect to the starting complexes and the products. M06 functional with 6-311G(d,p)<sup>8</sup> basis set (SDD for Cu) were used to calculate the single point energies to obtain more accurate energy data under the tetrahydrofuran (THF) solvent with SMD<sup>9</sup> solvation model. The corresponding single point energies based on Gibbs correction were displayed in Table S3 and used in the discussion below. To simplify calculation, truncated ligands without the corresponding phenyls (from Ph-BPE) were used.

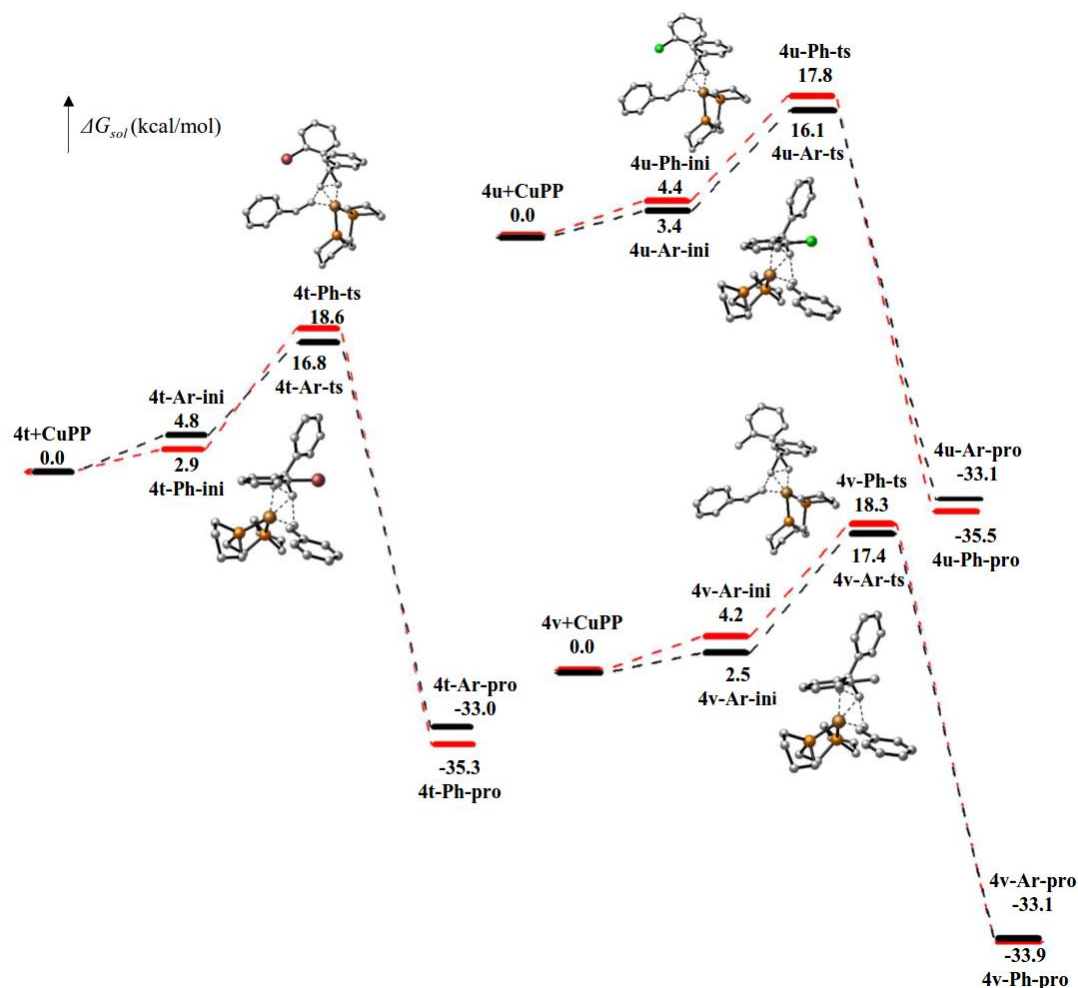

**Figure S8.** Calculated free energy profiles of the two diastereomeric carbocupration pathways of **4t-4v**. The paths represented by the black lines are favored due to lower reaction barriers.

**Table S3.** The calculated energies and Gibbs correction in gas phase ( $E_{\text{electron-gas}}$ ,  $G_{\text{correction}}$ ), the single point energies calculated in solvent THF ( $E_{\text{electron-solvent}}$ ) of all the compounds and imaginary frequencies of transition states (IF).

| Geometry  | $E_{\text{electron-gas}}$ | $G_{\text{correction}}$ | $E_{\text{electron-solvent}}$ | IF      |
|-----------|---------------------------|-------------------------|-------------------------------|---------|
| CuPP      | -1581.66949               | 0.348936                | -1581.90137                   |         |
| 4t-ini    | -3148.926681              | 0.165057                | -3151.84473                   |         |
| 4t-Si-ini | -4730.630002              | 0.543343                | -4733.767873                  |         |
| 4t-Si-ts  | -4730.612564              | 0.544531                | -4733.749831                  | -274.36 |
| 4t-Si-pro | -4730.693383              | 0.546291                | -4733.830976                  |         |
| 4t-Re-ini | -4730.625494              | 0.536129                | -4733.763643                  |         |
| 4t-Re-ts  | -4730.611166              | 0.544327                | -4733.746723                  | -276.34 |
| 4t-Re-pro | -4730.698684              | 0.546861                | -4733.83515                   |         |
| 4u-ini    | -1037.843729              | 0.166179                | -1038.018508                  |         |
| 4u-Si-ini | -2619.546191              | 0.543637                | -2619.943048                  |         |
| 4u-Si-ts  | -2619.528988              | 0.546014                | -2619.925176                  | -275.58 |
| 4u-Si-pro | -2619.610425              | 0.548521                | -2620.005996                  |         |
| 4u-Re-ini | -2619.54255               | 0.539871                | -2619.937701                  |         |
| 4u-Re-ts  | -2619.527244              | 0.545137                | -2619.921593                  | -280.18 |
| 4u-Re-pro | -2619.615532              | 0.548312                | -2620.009696                  |         |
| 4v-ini    | -617.5639726              | 0.202522                | -617.7186969                  |         |
| 4v-Si-ini | -2199.269321              | 0.579                   | -2199.643645                  |         |
| 4v-Si-ts  | -2199.251593              | 0.584385                | -2199.625223                  | -275.58 |
| 4v-Si-pro | -2199.329989              | 0.584485                | -2199.705763                  |         |
| 4v-Re-ini | -2199.263819              | 0.576547                | -2199.638521                  |         |
| 4v-Re-ts  | -2199.245733              | 0.581409                | -2199.620831                  | -291.41 |
| 4v-Re-pro | -2199.334367              | 0.586377                | -2199.709011                  |         |

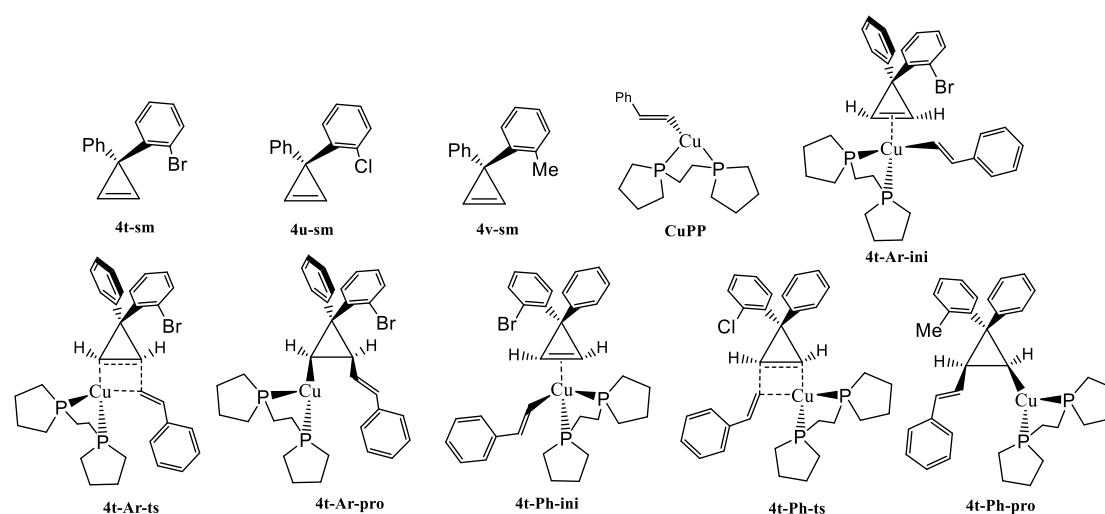

**Figure S9.** The structures of all the starting materials, transition states and productions for the reaction of **4t**. Respective species for **4u** and **4v** were named analogously whose structures were omitted for clarity.

We performed potential energy surfaces (PESs) scanning of **4t-Ar-ts** and **4t-Ph-ts** by rotating the *ortho*-Br phenyl and the non-substituted phenyl groups. The *ortho*-Br phenyl and non-substituted phenyl were respectively twisted for 360° and 180°, with 30° per step and the corresponding energies of these data points are summarized in Table S4. Some irrational structures are omitted<sup>10</sup>. It can be concluded that the initial geometries of **4t-Ar-ts** and **4t-Ph-ts** are the energy minimum on the PESs. The structures with 180° torsions of the bromophenyl group may be competitive with initial ones. Hence, we performed optimized calculations of **4t-Ar-ts** and **4t-Ph-ts** with 180° torsions of bromophenyl under the same level of theory. The corresponding coordinates are listed in Table S7. The energies of the twisted structures, [**4t-Ar-ts**]' and [**4t-Ph-ts**]' are 0.6 and 0.7 kcal/mol higher than initial ones, respectively, indicating that the originally obtained geometries of **4t-Ar-ts** and **4t-Ph-ts** are indeed the most probable ones.

**Table S4.** The single point energies of twisted **4t-Ar-ts** and **4t-Ph-ts**.<sup>a,b</sup>

| <b>4t-Ar-ts</b>                                       |      |      |       |       |       |      |      |       |     |     |     |       |
|-------------------------------------------------------|------|------|-------|-------|-------|------|------|-------|-----|-----|-----|-------|
| $\begin{matrix} \text{Br} \\ \text{non} \end{matrix}$ | 0    | 30   | 60    | 90    | 120   | 150  | 180  | 210   | 240 | 270 | 300 | 330   |
| 0                                                     | 0    |      |       |       | 145.9 | 15.1 | 12.5 | 221.4 |     |     |     | 108.0 |
| 30                                                    | 6.8  | 38   |       | 220.3 | 113.8 | 15.1 | 15.5 | 246.8 |     |     |     | 108.3 |
| 60                                                    | 39.9 |      | 232.3 | 128   | 111.9 | 16.9 | 19.0 | 242.3 |     |     |     | 110.4 |
| 90                                                    | 32.2 | 96.4 | 87.4  | 121.7 | 118.7 | 17.5 | 15.5 | 220.7 |     |     |     | 110.4 |
| 120                                                   | 5.2  | 24.9 | 70.4  | 178.1 | 182.8 | 22.4 | 14.3 | 218.5 |     |     |     | 110.3 |
| 150                                                   | 1.7  | 18.5 | 133.1 |       |       | 20.5 | 14.1 | 218.9 |     |     |     | 110.6 |

  

| <b>4t-Ph-ts</b>                                       |      |      |       |       |       |       |      |      |       |       |       |       |
|-------------------------------------------------------|------|------|-------|-------|-------|-------|------|------|-------|-------|-------|-------|
| $\begin{matrix} \text{Br} \\ \text{non} \end{matrix}$ | 0    | 30   | 60    | 90    | 120   | 150   | 180  | 210  | 240   | 270   | 300   | 330   |
| 0                                                     | 0.0  | 31.1 | 104.7 | 49.7  | 14.7  | 5.2   | 0.6  | 10.3 | 28.2  | 14.4  | 20.8  | 11.7  |
| 30                                                    | 7.4  | 10.6 | 23.5  | 30.1  | 55.3  | 45.9  | 11.1 | 14.7 | 28.8  | 18.9  | 30.2  | 21.7  |
| 60                                                    | 55.1 | 53.3 | 60.7  | 119.7 | 335.9 | 222.9 | 59.3 | 60.9 | 75.3  | 71.9  | 103.6 | 87.8  |
| 90                                                    | 74.6 | 73.5 | 99.0  | 394.5 |       | 127.6 | 75.3 | 81.4 | 102.0 | 149.3 |       | 105.1 |
| 120                                                   | 84.4 | 90.8 | 258.3 |       | 230.5 | 92.8  | 85.4 | 96.3 | 152.3 |       | 147.5 | 100.8 |
| 150                                                   | 18.4 | 55.6 |       | 234.3 | 43.6  | 20.7  | 19.2 | 35.0 | 115.2 | 63.5  | 43.6  | 30.6  |

<sup>a</sup> “Br” stands for 2-bromophenyl and “non” represents non-substituted phenyl. <sup>b</sup> Unit of the energies: kcal/mol.

**Table S5.** The geometrical coordinates of all the starting materials, transition states and productions.

| <b>CuPP</b> |             |             |             |
|-------------|-------------|-------------|-------------|
| Cu          | 0.52920200  | -0.93787000 | -0.69705900 |
| C           | -1.36069700 | -0.93645900 | -0.82802600 |
| H           | -1.80696000 | -0.36794500 | -1.65897600 |
| C           | -2.24194600 | -1.41641700 | 0.07330100  |
| H           | -1.87468000 | -2.00700000 | 0.92060600  |

|   |             |             |             |
|---|-------------|-------------|-------------|
| C | -3.70418300 | -1.25388900 | 0.07329800  |
| C | -4.47808800 | -1.99098700 | 0.97953600  |
| C | -4.37523800 | -0.37186900 | -0.78634300 |
| C | -5.86178600 | -1.86977500 | 1.01846200  |
| H | -3.97262200 | -2.67618500 | 1.66048200  |
| C | -5.75669200 | -0.24808600 | -0.75076200 |
| H | -3.79766300 | 0.22872300  | -1.48788100 |
| C | -6.51070500 | -0.99721000 | 0.15071000  |
| H | -6.43673100 | -2.45918700 | 1.73037000  |
| H | -6.25256700 | 0.44446900  | -1.42868800 |
| H | -7.59348900 | -0.89643400 | 0.17877600  |
| C | 1.90268900  | 1.56213500  | 0.95919300  |
| H | 1.38137300  | 0.90620900  | 1.67258900  |
| H | 2.19102100  | 2.46643900  | 1.51341600  |
| C | 3.13005600  | 0.85678200  | 0.38529900  |
| H | 3.96034800  | 0.80726400  | 1.10506500  |
| H | 3.50453700  | 1.39185000  | -0.50048700 |
| C | 4.16855700  | -1.43433100 | -1.12192800 |
| C | 3.15390800  | -1.86563600 | 1.35747900  |
| C | 4.79994400  | -2.56655300 | -0.30632300 |
| H | 4.85878100  | -0.58506700 | -1.21322500 |
| H | 3.88191400  | -1.73960400 | -2.13194300 |
| C | 4.62871000  | -2.21417800 | 1.16836000  |
| H | 2.53495900  | -2.77094900 | 1.37159600  |
| H | 2.93551100  | -1.30373800 | 2.27333500  |
| H | 4.27327700  | -3.50870300 | -0.51480000 |
| H | 5.85025000  | -2.72022900 | -0.57988000 |
| H | 4.94372800  | -3.03054200 | 1.82895800  |
| H | 5.25614700  | -1.34361300 | 1.41311000  |
| P | 2.68495300  | -0.86839100 | -0.14105900 |
| C | -0.85247600 | 2.36250600  | 0.57069300  |
| C | 1.11056800  | 3.82624100  | -0.57354800 |
| C | -1.08157600 | 3.87273900  | 0.49113500  |
| H | -0.68619200 | 2.04431600  | 1.60876600  |
| H | -1.69173100 | 1.77028300  | 0.18987200  |
| C | 0.28922200  | 4.54066600  | 0.49570100  |
| H | 0.80975100  | 4.16089600  | -1.57462400 |
| H | 2.19328500  | 3.98639400  | -0.49035300 |
| H | -1.59594000 | 4.12011300  | -0.44919400 |
| H | -1.72333700 | 4.22940200  | 1.30600400  |
| H | 0.22647600  | 5.62230100  | 0.31811100  |
| H | 0.75778500  | 4.40602200  | 1.48297000  |
| P | 0.69933400  | 1.99430200  | -0.42338600 |



**4t-ini**

|    |             |             |             |
|----|-------------|-------------|-------------|
| C  | 0.35249600  | -0.21454600 | 2.43680700  |
| C  | 0.54138900  | -1.48676800 | 2.32199800  |
| C  | 0.38186300  | -0.73250500 | 1.03019300  |
| C  | 1.59404800  | -0.48543100 | 0.17366300  |
| C  | 2.81371800  | -0.13356400 | 0.76009200  |
| C  | 1.54350400  | -0.61649700 | -1.21673700 |
| C  | 3.94540100  | 0.08070100  | -0.01643100 |
| H  | 2.87614100  | -0.02875400 | 1.84187200  |
| C  | 2.67625100  | -0.40424200 | -1.99516400 |
| H  | 0.60497000  | -0.88564300 | -1.69793400 |
| C  | 3.88309900  | -0.05461500 | -1.40004300 |
| H  | 4.88230700  | 0.35697600  | 0.46300100  |
| H  | 2.61192100  | -0.51210400 | -3.07586600 |
| H  | 4.76854000  | 0.11281200  | -2.00894100 |
| C  | -0.92422300 | -0.85995900 | 0.29764500  |
| C  | -1.47166300 | -2.12243200 | 0.05936100  |
| C  | -1.63892600 | 0.24333000  | -0.17335500 |
| C  | -2.67802100 | -2.28245800 | -0.61126900 |
| H  | -0.92540600 | -2.99441600 | 0.41756600  |
| C  | -2.84924500 | 0.10622000  | -0.84351700 |
| C  | -3.36965400 | -1.16360900 | -1.06340400 |
| H  | -3.07783500 | -3.27925600 | -0.78095200 |
| H  | -3.37527700 | 0.99298900  | -1.18675200 |
| H  | -4.31621500 | -1.27371500 | -1.58694900 |
| Br | -0.96758100 | 2.00106100  | 0.09359300  |
| H  | 0.74670000  | -2.45497000 | 2.75473300  |
| H  | 0.26927500  | 0.68719300  | 3.02543500  |

**4t-Ar-ini**

|    |            |             |             |
|----|------------|-------------|-------------|
| Cu | 0.62443900 | -0.78241300 | -0.07550300 |
| C  | 0.98453700 | 1.01902900  | -0.73836500 |
| H  | 1.06902500 | 1.21709700  | -1.81808900 |
| C  | 0.89212700 | 2.10755800  | 0.04852600  |
| H  | 0.77780300 | 1.96856100  | 1.13114200  |
| C  | 0.84374300 | 3.52447100  | -0.33960600 |
| C  | 0.75689400 | 4.50039200  | 0.66289600  |
| C  | 0.84861800 | 3.96019500  | -1.67252000 |
| C  | 0.69393500 | 5.85406600  | 0.35535500  |
| H  | 0.73642300 | 4.17544500  | 1.70458800  |
| C  | 0.78925600 | 5.31096600  | -1.98325700 |
| H  | 0.88948400 | 3.22146200  | -2.47171800 |
| C  | 0.71350100 | 6.26815700  | -0.97252400 |

|    |             |             |             |
|----|-------------|-------------|-------------|
| H  | 0.62878800  | 6.58927800  | 1.15547400  |
| H  | 0.79426400  | 5.62347100  | -3.02599500 |
| H  | 0.66342000  | 7.32615100  | -1.22036300 |
| C  | -0.91409200 | -1.38320700 | -1.18964100 |
| C  | -0.78500300 | -2.25936900 | -0.15639200 |
| C  | -2.01117800 | -1.36632500 | -0.16078800 |
| C  | -3.31829200 | -1.99059300 | -0.54428800 |
| C  | -4.52768000 | -1.55380400 | 0.00560900  |
| C  | -3.35501400 | -3.04309700 | -1.46729200 |
| C  | -5.73164600 | -2.14773900 | -0.35498200 |
| H  | -4.52615400 | -0.73485400 | 0.72236100  |
| C  | -4.55833000 | -3.63635300 | -1.82788800 |
| H  | -2.42779200 | -3.40351700 | -1.90922200 |
| C  | -5.75435500 | -3.19209700 | -1.27306400 |
| H  | -6.65928900 | -1.78826500 | 0.08537100  |
| H  | -4.56066500 | -4.45182300 | -2.54830000 |
| H  | -6.69677900 | -3.65594000 | -1.55503400 |
| C  | -2.07062400 | -0.22313900 | 0.81126200  |
| C  | -1.87978100 | -0.46154000 | 2.17567900  |
| C  | -2.28725700 | 1.10035300  | 0.41863800  |
| C  | -1.87175900 | 0.57239500  | 3.10572400  |
| H  | -1.72751400 | -1.49348400 | 2.49477200  |
| C  | -2.26168800 | 2.15014700  | 1.33038400  |
| C  | -2.04957700 | 1.88556700  | 2.67818000  |
| H  | -1.72987600 | 0.35442800  | 4.16316500  |
| H  | -2.39218100 | 3.16932500  | 0.97514900  |
| H  | -2.02986700 | 2.70716300  | 3.39067100  |
| Br | -2.60922300 | 1.52842700  | -1.39846500 |
| H  | -0.60761100 | -3.31523200 | 0.01938100  |
| H  | -0.88099800 | -1.31100700 | -2.27165600 |
| C  | 3.92860900  | -0.87591500 | 0.13620800  |
| H  | 3.69159700  | 0.19748100  | 0.12869300  |
| H  | 5.00852200  | -0.98046800 | -0.04087000 |
| C  | 3.52562300  | -1.50314600 | 1.46625600  |
| H  | 4.17408500  | -1.17603000 | 2.29202000  |
| H  | 3.60567400  | -2.59996600 | 1.41482900  |
| C  | 1.36147700  | -2.32106900 | 3.23304900  |
| C  | 1.92475000  | 0.32181500  | 3.05613700  |
| C  | 1.17817300  | -1.49304600 | 4.50868900  |
| H  | 2.20784800  | -3.01361900 | 3.33396400  |
| H  | 0.47791300  | -2.91439000 | 2.97445300  |
| C  | 2.14261800  | -0.31260600 | 4.42701900  |
| H  | 0.98143300  | 0.88526500  | 3.03710900  |
| H  | 2.72295300  | 0.99872400  | 2.72926200  |

|   |            |             |             |
|---|------------|-------------|-------------|
| H | 0.14839500 | -1.10804700 | 4.54945000  |
| H | 1.33137400 | -2.09734000 | 5.41059300  |
| H | 1.98459400 | 0.40627500  | 5.24026300  |
| H | 3.17782200 | -0.67591600 | 4.51803800  |
| P | 1.75531400 | -1.10022600 | 1.87250500  |
| C | 3.45979700 | -0.56494600 | -2.69757300 |
| C | 4.19281100 | -2.99071200 | -1.75491700 |
| C | 4.36089200 | -1.40685800 | -3.60246500 |
| H | 3.99701100 | 0.30615000  | -2.29919200 |
| H | 2.57190900 | -0.18597700 | -3.21347700 |
| C | 5.18472600 | -2.32051000 | -2.70201500 |
| H | 3.64967600 | -3.79201300 | -2.27221400 |
| H | 4.65849900 | -3.43620300 | -0.86657700 |
| H | 3.74149500 | -2.02684500 | -4.26756200 |
| H | 4.98858400 | -0.78001400 | -4.24766600 |
| H | 5.76993200 | -3.05093100 | -3.27564800 |
| H | 5.90376400 | -1.71650200 | -2.12787200 |
| P | 2.95572700 | -1.66091300 | -1.25888000 |

#### 4t-Ar-ts

|    |             |             |             |
|----|-------------|-------------|-------------|
| Cu | -1.39180700 | 0.32708300  | -0.06857600 |
| C  | -0.08135600 | -0.53217700 | -1.32319300 |
| H  | -0.06937000 | -0.33370300 | -2.40104600 |
| C  | 0.62230200  | -1.58513900 | -0.86211800 |
| H  | 0.63295700  | -1.77670500 | 0.21707300  |
| C  | 1.39636000  | -2.56566400 | -1.62566300 |
| C  | 1.85394900  | -3.71932800 | -0.97323500 |
| C  | 1.71573300  | -2.40805800 | -2.98195700 |
| C  | 2.58571100  | -4.68810900 | -1.64881000 |
| H  | 1.62382300  | -3.84444700 | 0.08686000  |
| C  | 2.44578200  | -3.37415400 | -3.65787500 |
| H  | 1.39859400  | -1.50455100 | -3.50073100 |
| C  | 2.88286700  | -4.52189200 | -2.99765500 |
| H  | 2.92794500  | -5.57563300 | -1.11993600 |
| H  | 2.68614400  | -3.22919000 | -4.70940500 |
| H  | 3.45798400  | -5.27570800 | -3.53063900 |
| C  | 0.14342500  | 1.48517100  | -0.60410300 |
| C  | -0.44658600 | 2.04392400  | 0.55574200  |
| C  | 1.03403200  | 1.77271300  | 0.57536600  |
| C  | 1.91782300  | 2.98258600  | 0.46611000  |
| C  | 1.62454100  | 4.00795600  | -0.44098200 |
| C  | 3.01839300  | 3.15658500  | 1.31235800  |
| C  | 2.41619200  | 5.14730600  | -0.51887500 |
| H  | 0.75795900  | 3.92019000  | -1.09338500 |

|    |             |             |             |
|----|-------------|-------------|-------------|
| C  | 3.80412600  | 4.30049100  | 1.24377000  |
| H  | 3.26510900  | 2.38086600  | 2.03472700  |
| C  | 3.51258400  | 5.30120700  | 0.32308000  |
| H  | 2.16965500  | 5.92316100  | -1.24116200 |
| H  | 4.65345700  | 4.40735200  | 1.91546900  |
| H  | 4.13028300  | 6.19457100  | 0.26551600  |
| C  | 1.59826500  | 0.61825700  | 1.34500600  |
| C  | 1.02057000  | 0.22171100  | 2.55164200  |
| C  | 2.69228400  | -0.12513000 | 0.88645100  |
| C  | 1.49547100  | -0.87351300 | 3.26661500  |
| H  | 0.16810600  | 0.80037100  | 2.90706200  |
| C  | 3.17392500  | -1.22958500 | 1.58035300  |
| C  | 2.56947500  | -1.60916400 | 2.77374100  |
| H  | 1.03052900  | -1.15135000 | 4.21164000  |
| H  | 4.00895500  | -1.79309300 | 1.17178700  |
| H  | 2.94639300  | -2.47161700 | 3.31906900  |
| Br | 3.56749100  | 0.32414400  | -0.73715100 |
| H  | -0.89213600 | 3.03124600  | 0.64942800  |
| H  | 0.28847700  | 1.84168400  | -1.62229600 |
| C  | -4.60354700 | -0.53386000 | -0.14085500 |
| H  | -4.48759100 | -1.37155300 | -0.84515400 |
| H  | -5.66817700 | -0.25864400 | -0.14400000 |
| C  | -4.14038900 | -0.95150100 | 1.25089600  |
| H  | -4.68942400 | -1.83502500 | 1.60819100  |
| H  | -4.32073300 | -0.14355300 | 1.97567500  |
| C  | -1.99234700 | -1.73728100 | 3.05221900  |
| C  | -2.20165600 | -3.03860700 | 0.67941600  |
| C  | -1.39624000 | -3.14343700 | 2.98705900  |
| H  | -2.94647100 | -1.74098000 | 3.59788500  |
| H  | -1.32702200 | -1.01032400 | 3.52852900  |
| C  | -2.19210500 | -3.90976900 | 1.93437500  |
| H  | -1.26759700 | -3.14094400 | 0.11062800  |
| H  | -3.02439200 | -3.26170200 | -0.01093000 |
| H  | -0.34247000 | -3.07614100 | 2.67049600  |
| H  | -1.40921100 | -3.63706800 | 3.96649600  |
| H  | -1.77188800 | -4.90371100 | 1.73840500  |
| H  | -3.22043200 | -4.06067800 | 2.29789200  |
| P  | -2.30827100 | -1.27514200 | 1.27154500  |
| C  | -4.34940500 | 1.07015200  | -2.52369900 |
| C  | -4.45052400 | 2.35275100  | -0.13891800 |
| C  | -5.00195800 | 2.45441400  | -2.51640600 |
| H  | -5.10414200 | 0.28389400  | -2.66191700 |
| H  | -3.60240600 | 0.95383900  | -3.31430300 |
| C  | -5.57436100 | 2.67662100  | -1.11984500 |

|   |             |            |             |
|---|-------------|------------|-------------|
| H | -3.72513000 | 3.17481700 | -0.08472100 |
| H | -4.79108600 | 2.15624900 | 0.88505000  |
| H | -4.24109100 | 3.22237700 | -2.71856900 |
| H | -5.76372300 | 2.54723100 | -3.29983400 |
| H | -5.95813600 | 3.69561200 | -0.98662900 |
| H | -6.42183400 | 1.99280600 | -0.95978400 |
| P | -3.56917700 | 0.85959200 | -0.83051300 |

**4t-Ar-pro**

|    |             |             |             |
|----|-------------|-------------|-------------|
| Cu | 0.81300700  | -1.63981200 | -0.16467900 |
| C  | -0.49751200 | 1.03953200  | -1.46733500 |
| H  | -0.54645200 | 1.74976000  | -2.29825100 |
| C  | 0.26825000  | 1.36914100  | -0.41194800 |
| H  | 0.25982300  | 0.71512900  | 0.46615600  |
| C  | 1.07787100  | 2.57875800  | -0.28086900 |
| C  | 1.39640200  | 3.05544800  | 1.00005700  |
| C  | 1.58059500  | 3.28571600  | -1.38440800 |
| C  | 2.17637900  | 4.19226900  | 1.17384000  |
| H  | 0.99107800  | 2.53051200  | 1.86606900  |
| C  | 2.35641600  | 4.42428200  | -1.21113600 |
| H  | 1.36563200  | 2.92670000  | -2.39017500 |
| C  | 2.66242500  | 4.88344000  | 0.06808900  |
| H  | 2.39955100  | 4.54521900  | 2.17876400  |
| H  | 2.73372000  | 4.95482700  | -2.08320700 |
| H  | 3.27526600  | 5.77198600  | 0.20046800  |
| C  | -1.32596900 | -0.16722000 | -1.63178000 |
| C  | -0.95969400 | -1.50432800 | -0.98493200 |
| C  | -2.17464300 | -0.75693500 | -0.50748300 |
| C  | -3.52155500 | -1.31945000 | -0.88034400 |
| C  | -3.97899600 | -2.45714900 | -0.20571400 |
| C  | -4.33333600 | -0.77133300 | -1.87429600 |
| C  | -5.20485200 | -3.03109400 | -0.51532500 |
| H  | -3.34976500 | -2.89626200 | 0.56867300  |
| C  | -5.56056000 | -1.34707400 | -2.19175700 |
| H  | -4.00422400 | 0.12339900  | -2.39848400 |
| C  | -6.00246100 | -2.47707400 | -1.51393400 |
| H  | -5.53825500 | -3.91781400 | 0.02044100  |
| H  | -6.17733500 | -0.90280000 | -2.97062400 |
| H  | -6.96252700 | -2.92524200 | -1.76090700 |
| C  | -2.16999000 | -0.12054100 | 0.85181200  |
| C  | -1.67141400 | -0.83994500 | 1.94476000  |
| C  | -2.66733300 | 1.15838000  | 1.12309200  |
| C  | -1.64897400 | -0.31311600 | 3.23064600  |
| H  | -1.26894200 | -1.83310100 | 1.74470100  |

|    |             |             |             |
|----|-------------|-------------|-------------|
| C  | -2.62625600 | 1.71621900  | 2.39788400  |
| C  | -2.11309000 | 0.97958800  | 3.45745400  |
| H  | -1.26645900 | -0.91075500 | 4.05718400  |
| H  | -3.00455700 | 2.72347900  | 2.55055800  |
| H  | -2.08969100 | 1.41230100  | 4.45500300  |
| Br | -3.42668500 | 2.23297500  | -0.24717400 |
| H  | -1.25675700 | -2.33553500 | -1.63444300 |
| H  | -1.82052900 | -0.20402400 | -2.60401200 |
| C  | 3.80692600  | -0.27099700 | -0.33911100 |
| H  | 3.31936900  | 0.68702200  | -0.09538500 |
| H  | 4.79473700  | -0.03057500 | -0.75705700 |
| C  | 3.92948600  | -1.14749900 | 0.90495100  |
| H  | 4.56387700  | -0.68254400 | 1.67343400  |
| H  | 4.38997400  | -2.11440700 | 0.64978300  |
| C  | 2.59776800  | -2.76377100 | 2.94442600  |
| C  | 2.01800900  | -0.11414000 | 2.80870400  |
| C  | 2.16034500  | -2.08786200 | 4.24475200  |
| H  | 3.67758600  | -2.96687400 | 2.95586200  |
| H  | 2.07951100  | -3.70791200 | 2.75451000  |
| C  | 2.56688200  | -0.62144200 | 4.14089600  |
| H  | 0.94323200  | 0.10145600  | 2.88567100  |
| H  | 2.51107100  | 0.79184500  | 2.43333600  |
| H  | 1.06567100  | -2.15248500 | 4.34051500  |
| H  | 2.58961900  | -2.58311500 | 5.12378000  |
| H  | 2.19632700  | -0.02734500 | 4.98515400  |
| H  | 3.66505300  | -0.54659300 | 4.15245600  |
| P  | 2.24036400  | -1.51619800 | 1.60038300  |
| C  | 2.68334500  | 0.15978800  | -2.98471400 |
| C  | 4.02786600  | -2.14179100 | -2.50324900 |
| C  | 3.48890500  | -0.41974400 | -4.14964300 |
| H  | 3.12914400  | 1.09113300  | -2.60788600 |
| H  | 1.64229800  | 0.37835800  | -3.24546900 |
| C  | 4.64242800  | -1.21999000 | -3.55447500 |
| H  | 3.52599200  | -2.99306500 | -2.97984700 |
| H  | 4.75501800  | -2.54928200 | -1.79004200 |
| H  | 2.85137800  | -1.09511700 | -4.73852400 |
| H  | 3.83580800  | 0.36525400  | -4.83233500 |
| H  | 5.19745300  | -1.77903700 | -4.31849100 |
| H  | 5.35823200  | -0.53309000 | -3.07824800 |
| P  | 2.73456000  | -1.11589500 | -1.61677100 |

**4t-Ph-ini**

|    |             |             |             |
|----|-------------|-------------|-------------|
| Cu | -0.44416900 | -0.42319700 | -0.15361500 |
| C  | -1.60183200 | 0.82649100  | 0.79410700  |

|    |             |             |             |
|----|-------------|-------------|-------------|
| H  | -1.84094200 | 0.64960700  | 1.85699300  |
| C  | -2.21150400 | 1.88812600  | 0.23443300  |
| H  | -2.01430100 | 2.10700300  | -0.82489700 |
| C  | -3.18031200 | 2.81371400  | 0.84139200  |
| C  | -3.87513100 | 3.71207500  | 0.02051500  |
| C  | -3.45879900 | 2.84076000  | 2.21557000  |
| C  | -4.81521700 | 4.59324000  | 0.54128500  |
| H  | -3.66579400 | 3.70958700  | -1.05010600 |
| C  | -4.39554300 | 3.71982800  | 2.73935200  |
| H  | -2.92090500 | 2.16510400  | 2.87913100  |
| C  | -5.08250900 | 4.60148300  | 1.90626400  |
| H  | -5.34049700 | 5.27817700  | -0.12180600 |
| H  | -4.59004800 | 3.72323800  | 3.81044600  |
| H  | -5.81504600 | 5.29096200  | 2.32004100  |
| C  | 0.95795300  | 0.62050000  | -1.10780400 |
| C  | 1.14793700  | -0.70020300 | -1.38769800 |
| C  | 2.20997200  | -0.01578200 | -0.56650200 |
| C  | 2.36707400  | -0.36394900 | 0.89066900  |
| C  | 1.74236300  | 0.37085900  | 1.90020800  |
| C  | 3.14710600  | -1.46789900 | 1.24785000  |
| C  | 1.87556900  | -0.00578400 | 3.23437800  |
| H  | 1.13724000  | 1.23361100  | 1.62881100  |
| C  | 3.28925400  | -1.84107700 | 2.57996200  |
| H  | 3.65107600  | -2.03584100 | 0.46478500  |
| C  | 2.64886900  | -1.11074000 | 3.57930800  |
| H  | 1.38196500  | 0.57821100  | 4.00891200  |
| H  | 3.90214100  | -2.70205700 | 2.84048600  |
| H  | 2.75903500  | -1.39870600 | 4.62282000  |
| C  | 3.50536600  | 0.30921000  | -1.25953900 |
| C  | 4.10379600  | -0.63240000 | -2.10250100 |
| C  | 4.17208700  | 1.52691800  | -1.09599200 |
| C  | 5.30915500  | -0.38165100 | -2.74589500 |
| H  | 3.59837700  | -1.58643200 | -2.24997800 |
| C  | 5.37739300  | 1.79815900  | -1.73378000 |
| C  | 5.94968900  | 0.83848100  | -2.55962900 |
| H  | 5.74744500  | -1.13820900 | -3.39236400 |
| H  | 5.85694400  | 2.76149200  | -1.58205900 |
| H  | 6.89231300  | 1.05014500  | -3.05842500 |
| Br | 3.43182000  | 2.88954200  | -0.00117600 |
| C  | -2.61279300 | -2.88759900 | 0.38205000  |
| H  | -3.25325700 | -2.13443000 | 0.86625400  |
| H  | -2.86834300 | -3.86097300 | 0.82619600  |
| C  | -2.83825900 | -2.89218200 | -1.12512300 |
| H  | -3.87086200 | -3.19080700 | -1.35839400 |

|   |             |             |             |
|---|-------------|-------------|-------------|
| H | -2.18226700 | -3.63513400 | -1.60485100 |
| C | -2.93885300 | -1.68906400 | -3.71010000 |
| C | -4.07247200 | -0.35685200 | -1.64524200 |
| C | -4.17034100 | -0.84148900 | -4.03610200 |
| H | -3.18167600 | -2.75986600 | -3.75642200 |
| H | -2.10954500 | -1.50935900 | -4.40135300 |
| C | -5.01498000 | -0.77571600 | -2.76895800 |
| H | -3.87389700 | 0.72270500  | -1.67079400 |
| H | -4.44874000 | -0.57237500 | -0.63787300 |
| H | -3.85533500 | 0.17639900  | -4.30934500 |
| H | -4.72631400 | -1.24322500 | -4.89239900 |
| H | -5.86315200 | -0.08718600 | -2.87064900 |
| H | -5.43713800 | -1.77089700 | -2.56078000 |
| P | -2.45239600 | -1.24583400 | -1.94106700 |
| C | -0.89217700 | -2.51490100 | 2.68775100  |
| C | 0.05315300  | -4.01720200 | 0.63647200  |
| C | -0.01191500 | -3.71315900 | 3.06030900  |
| H | -1.93034500 | -2.65316200 | 3.01864600  |
| H | -0.52301900 | -1.57554900 | 3.11406900  |
| C | -0.14553800 | -4.75931800 | 1.95649900  |
| H | 1.11165700  | -3.76335400 | 0.48561200  |
| H | -0.28768400 | -4.57020000 | -0.24714500 |
| H | 1.03492100  | -3.38023000 | 3.11286400  |
| H | -0.27382600 | -4.11486600 | 4.04631900  |
| H | 0.57217700  | -5.57990900 | 2.07890900  |
| H | -1.15036800 | -5.20777500 | 1.98630800  |
| P | -0.87508200 | -2.41924900 | 0.82682700  |
| H | 0.70757500  | 1.57135700  | -1.56494100 |
| H | 1.11847800  | -1.38930100 | -2.22449600 |

#### 4t-Ph-ts

|    |             |             |             |
|----|-------------|-------------|-------------|
| Cu | -1.06200800 | -0.47325100 | -0.68077000 |
| C  | -0.22701800 | 0.96543600  | 0.43965600  |
| H  | 0.24529400  | 0.59177600  | 1.35658400  |
| C  | -0.37145700 | 2.29756400  | 0.31476500  |
| H  | -0.80645700 | 2.69851900  | -0.60919700 |
| C  | 0.00599600  | 3.32262600  | 1.29235100  |
| C  | -0.51369000 | 4.61863500  | 1.16940900  |
| C  | 0.88654200  | 3.06846700  | 2.35512000  |
| C  | -0.18789400 | 5.61675600  | 2.07904600  |
| H  | -1.19202600 | 4.83372200  | 0.34276100  |
| C  | 1.21341400  | 4.06449600  | 3.26398200  |
| H  | 1.33053300  | 2.07800800  | 2.45216300  |



|    |             |             |             |
|----|-------------|-------------|-------------|
| C  | 0.67643100  | 5.34424100  | 3.13484300  |
| H  | -0.60891200 | 6.61353300  | 1.96216800  |
| H  | 1.90349200  | 3.84518700  | 4.07656800  |
| H  | 0.93792900  | 6.12391000  | 3.84669600  |
| C  | 0.77901400  | 0.01863700  | -1.22989300 |
| C  | 0.49041000  | -1.23518000 | -1.81355100 |
| C  | 1.64063100  | -1.14099100 | -0.84469500 |
| C  | 1.55091900  | -1.85274000 | 0.48146000  |
| C  | 2.15489100  | -1.34220900 | 1.63437700  |
| C  | 0.89649600  | -3.08342800 | 0.56118800  |
| C  | 2.08556500  | -2.03476400 | 2.83985600  |
| H  | 2.68133100  | -0.38973300 | 1.58136700  |
| C  | 0.84460400  | -3.78962600 | 1.75941000  |
| H  | 0.42098600  | -3.47030000 | -0.34014200 |
| C  | 1.43309300  | -3.26312100 | 2.90668800  |
| H  | 2.55330800  | -1.61754100 | 3.72939100  |
| H  | 0.34492000  | -4.75735500 | 1.79834400  |
| H  | 1.38858600  | -3.81039000 | 3.84641500  |
| C  | 3.03911800  | -1.14491200 | -1.40621300 |
| C  | 3.45164900  | -2.28196500 | -2.11215700 |
| C  | 3.97366700  | -0.11427900 | -1.27084300 |
| C  | 4.71953500  | -2.38876800 | -2.66432200 |
| H  | 2.73474800  | -3.09587600 | -2.21999100 |
| C  | 5.24859200  | -0.20024400 | -1.82497100 |
| C  | 5.62306900  | -1.33959800 | -2.52335800 |
| H  | 5.00258400  | -3.28795000 | -3.20648300 |
| H  | 5.94025200  | 0.62864700  | -1.70008900 |
| H  | 6.61956000  | -1.40483300 | -2.95355800 |
| Br | 3.57322500  | 1.48459900  | -0.31062500 |
| C  | -3.91711700 | -0.60072200 | 0.75782100  |
| H  | -3.70157300 | 0.39569300  | 1.17371700  |
| H  | -4.70389100 | -1.05019900 | 1.37999800  |
| C  | -4.35393600 | -0.48702600 | -0.69876400 |
| H  | -5.30034100 | 0.06406200  | -0.79616200 |
| H  | -4.52253000 | -1.48772300 | -1.12524800 |
| C  | -3.75222700 | 0.11784300  | -3.45666700 |
| C  | -3.53689100 | 2.10828100  | -1.63499400 |
| C  | -4.12141500 | 1.52600600  | -3.93069700 |
| H  | -4.64578200 | -0.51692000 | -3.38451600 |
| H  | -3.04412200 | -0.38409600 | -4.12236400 |
| C  | -4.60142800 | 2.30538800  | -2.71013400 |
| H  | -2.65550600 | 2.72743500  | -1.84694400 |
| H  | -3.86322800 | 2.35401600  | -0.61677300 |
| H  | -3.23039800 | 2.02142200  | -4.34298500 |

|   |             |             |             |
|---|-------------|-------------|-------------|
| H | -4.87020300 | 1.50050300  | -4.73153200 |
| H | -4.76747800 | 3.36606800  | -2.93585200 |
| H | -5.56514200 | 1.89731500  | -2.36941900 |
| P | -3.02514400 | 0.31544100  | -1.73800600 |
| C | -1.95522500 | -1.47991600 | 2.70827900  |
| C | -2.97124800 | -3.30593000 | 0.98592100  |
| C | -2.30166600 | -2.85431000 | 3.29734300  |
| H | -2.56342600 | -0.67734500 | 3.14540200  |
| H | -0.90224900 | -1.21951100 | 2.86503600  |
| C | -3.39422200 | -3.49080100 | 2.44145800  |
| H | -2.15048200 | -3.98644700 | 0.72479200  |
| H | -3.77770400 | -3.46741300 | 0.26053000  |
| H | -1.40447900 | -3.48782300 | 3.25870800  |
| H | -2.59636600 | -2.77924700 | 4.35081000  |
| H | -3.54698000 | -4.54761400 | 2.69450000  |
| H | -4.35353200 | -2.98195700 | 2.61907300  |
| P | -2.32603900 | -1.56338800 | 0.88098100  |
| H | 1.08843200  | 0.97597400  | -1.63288700 |
| H | 0.53474300  | -1.47609800 | -2.87157900 |

#### 4t-Ph-pro

|    |             |             |             |
|----|-------------|-------------|-------------|
| Cu | -0.76509200 | 0.55802500  | 1.43447400  |
| C  | 0.28825300  | -1.26382200 | -0.62549700 |
| H  | -0.07454400 | -0.29495700 | -0.97974700 |
| C  | -0.30848000 | -2.37990100 | -1.07573100 |
| H  | 0.03685000  | -3.34897100 | -0.70523300 |
| C  | -1.48739000 | -2.40344000 | -1.93812600 |
| C  | -2.23162600 | -3.58587900 | -2.05483900 |
| C  | -1.96493600 | -1.26670600 | -2.61302000 |
| C  | -3.41684100 | -3.62781400 | -2.77974100 |
| H  | -1.87507000 | -4.48042000 | -1.54414500 |
| C  | -3.15134100 | -1.30648800 | -3.33306900 |
| H  | -1.38985400 | -0.34091900 | -2.58273800 |
| C  | -3.89131300 | -2.48521700 | -3.41628700 |
| H  | -3.97571600 | -4.55928800 | -2.84437800 |
| H  | -3.49759100 | -0.40909800 | -3.84457300 |
| H  | -4.81949100 | -2.51379900 | -3.98200900 |
| C  | 1.31988100  | -1.18411700 | 0.40558800  |
| C  | 1.03490600  | -0.20179100 | 1.56122900  |
| C  | 2.15457300  | 0.05953700  | 0.58681100  |
| C  | 2.04890600  | 1.23262400  | -0.35211600 |
| C  | 1.79988800  | 2.50484200  | 0.17400800  |
| C  | 2.24358600  | 1.11355100  | -1.73053900 |
| C  | 1.76825000  | 3.62730500  | -0.64519100 |

|    |             |             |             |
|----|-------------|-------------|-------------|
| H  | 1.62083400  | 2.59728700  | 1.24507600  |
| C  | 2.19363100  | 2.23369000  | -2.55872000 |
| H  | 2.43825300  | 0.13000700  | -2.15400500 |
| C  | 1.96392000  | 3.49524600  | -2.01932500 |
| H  | 1.58979300  | 4.61094300  | -0.21174500 |
| H  | 2.34596000  | 2.11824900  | -3.63004000 |
| H  | 1.93469400  | 4.37173900  | -2.66416000 |
| C  | 3.56340900  | -0.14630000 | 1.07448200  |
| C  | 3.96038000  | 0.51547500  | 2.24390700  |
| C  | 4.53873000  | -0.92077300 | 0.43797000  |
| C  | 5.24699200  | 0.41835300  | 2.75308800  |
| H  | 3.21147100  | 1.11466400  | 2.76021600  |
| C  | 5.83280500  | -1.04000700 | 0.93807600  |
| C  | 6.19056300  | -0.36604400 | 2.09741600  |
| H  | 5.51201700  | 0.94978900  | 3.66423500  |
| H  | 6.55157700  | -1.66195200 | 0.41115900  |
| H  | 7.20215100  | -0.45912500 | 2.48535400  |
| Br | 4.16589300  | -1.89061500 | -1.16039100 |
| H  | 1.40273500  | -0.61593200 | 2.50546500  |
| H  | 1.81740000  | -2.12803400 | 0.64026200  |
| C  | -3.61134600 | 1.27232700  | -0.13590600 |
| H  | -3.50786700 | 0.44374000  | -0.85550000 |
| H  | -4.31421600 | 1.99233600  | -0.57871700 |
| C  | -4.12070800 | 0.74712200  | 1.20200100  |
| H  | -5.06765900 | 0.20167700  | 1.08027100  |
| H  | -4.31589600 | 1.57856200  | 1.89622600  |
| C  | -3.74013600 | -0.89880800 | 3.56199200  |
| C  | -3.13489400 | -1.95786500 | 1.13556600  |
| C  | -3.95948000 | -2.40515600 | 3.39354000  |
| H  | -4.69937600 | -0.36576800 | 3.61547100  |
| H  | -3.16964400 | -0.64970100 | 4.46122000  |
| C  | -4.24222600 | -2.65985600 | 1.91681200  |
| H  | -2.19728100 | -2.52920900 | 1.16395400  |
| H  | -3.36735200 | -1.79273000 | 0.07482100  |
| H  | -3.04479900 | -2.94293700 | 3.68180600  |
| H  | -4.76360700 | -2.76984100 | 4.04409100  |
| H  | -4.28986600 | -3.73011900 | 1.68147200  |
| H  | -5.22088600 | -2.23152600 | 1.65163200  |
| P  | -2.83987100 | -0.34096900 | 2.01533100  |
| C  | -1.56523000 | 2.51006900  | -1.75412800 |
| C  | -2.31652400 | 3.77198400  | 0.52317500  |
| C  | -1.66877000 | 4.03916000  | -1.81733700 |
| H  | -2.31964500 | 2.02618800  | -2.39086800 |
| H  | -0.57576300 | 2.15599900  | -2.06910100 |

|   |             |            |             |
|---|-------------|------------|-------------|
| C | -2.68081500 | 4.49506700 | -0.77121800 |
| H | -1.41606100 | 4.21003500 | 0.97416000  |
| H | -3.10684700 | 3.78595000 | 1.28327200  |
| H | -0.68501500 | 4.46726700 | -1.57695100 |
| H | -1.93047800 | 4.38266500 | -2.82528900 |
| H | -2.67889500 | 5.58510400 | -0.64571900 |
| H | -3.69730600 | 4.21375500 | -1.08482900 |
| P | -1.90821500 | 2.02490000 | 0.02162100  |

**4u-ini**

|    |             |             |             |
|----|-------------|-------------|-------------|
| C  | -0.22884600 | 2.30399200  | 0.82232800  |
| C  | -0.30592600 | 2.58214000  | -0.43619900 |
| C  | -0.20947600 | 1.11971800  | -0.09744100 |
| C  | -1.43695100 | 0.25796400  | -0.21983400 |
| C  | -2.68978900 | 0.75661300  | 0.15161200  |
| C  | -1.36757100 | -1.04577600 | -0.71838200 |
| C  | -3.83417800 | -0.02116400 | 0.03078900  |
| H  | -2.76823000 | 1.77043500  | 0.54011200  |
| C  | -2.51309400 | -1.82497100 | -0.84163400 |
| H  | -0.40453000 | -1.45873900 | -1.01296300 |
| C  | -3.75235700 | -1.31786400 | -0.46791700 |
| H  | -4.79682700 | 0.38845700  | 0.32988100  |
| H  | -2.43284900 | -2.83723300 | -1.23226900 |
| H  | -4.64773400 | -1.92783000 | -0.56284300 |
| C  | 1.10467000  | 0.42972400  | -0.33162600 |
| C  | 1.75568500  | 0.55272700  | -1.56090000 |
| C  | 1.72944100  | -0.35082600 | 0.64349700  |
| C  | 2.97506200  | -0.06569000 | -1.80864100 |
| H  | 1.28074900  | 1.15629400  | -2.33363200 |
| C  | 2.95094100  | -0.97604000 | 0.41949600  |
| C  | 3.57447400  | -0.83170600 | -0.81406800 |
| H  | 3.45700300  | 0.04991900  | -2.77636000 |
| H  | 3.40155900  | -1.56768600 | 1.21191200  |
| H  | 4.53006500  | -1.31829800 | -0.99350600 |
| H  | -0.42985500 | 3.28957600  | -1.24303100 |
| H  | -0.22782500 | 2.59111900  | 1.86343000  |
| Cl | 0.97211700  | -0.56171000 | 2.21075200  |

**4u-Ar-ini**

|    |            |             |             |
|----|------------|-------------|-------------|
| Cu | 0.36402000 | -0.76445800 | -0.07062400 |
| C  | 1.01947000 | 0.91720800  | -0.81523800 |
| H  | 1.17172100 | 1.02144200  | -1.90065200 |
| C  | 1.07286800 | 2.06236100  | -0.10918900 |

|   |             |             |             |
|---|-------------|-------------|-------------|
| H | 0.90030900  | 2.02547300  | 0.97409500  |
| C | 1.26622500  | 3.43471400  | -0.60083600 |
| C | 1.26967000  | 4.49448100  | 0.31653000  |
| C | 1.42049700  | 3.75007000  | -1.95848300 |
| C | 1.43356100  | 5.81153300  | -0.09628000 |
| H | 1.13565900  | 4.26656700  | 1.37535100  |
| C | 1.58717600  | 5.06297900  | -2.37396200 |
| H | 1.39872400  | 2.94825300  | -2.69505000 |
| C | 1.59696600  | 6.10365700  | -1.44643400 |
| H | 1.43310700  | 6.61383000  | 0.63944300  |
| H | 1.70449400  | 5.28069700  | -3.43406100 |
| H | 1.72484400  | 7.13243600  | -1.77584900 |
| C | -1.18024300 | -1.19641500 | -1.25326400 |
| C | -1.24740300 | -2.01812000 | -0.17077600 |
| C | -2.32016300 | -0.95380500 | -0.30248400 |
| C | -3.68272500 | -1.39744900 | -0.74011600 |
| C | -4.84089000 | -0.75474000 | -0.29160800 |
| C | -3.82659100 | -2.48497600 | -1.61064800 |
| C | -6.09875300 | -1.18243600 | -0.70058400 |
| H | -4.75519700 | 0.09434500  | 0.38383600  |
| C | -5.08361500 | -2.91228200 | -2.01947200 |
| H | -2.94141800 | -3.00478100 | -1.97286200 |
| C | -6.22774300 | -2.26318600 | -1.56631300 |
| H | -6.98449000 | -0.66409500 | -0.33942600 |
| H | -5.16902600 | -3.75885600 | -2.69767000 |
| H | -7.21215600 | -2.59702000 | -1.88616700 |
| C | -2.25692800 | 0.24440300  | 0.60012900  |
| C | -2.15602500 | 0.07633500  | 1.98397700  |
| C | -2.26180500 | 1.55575500  | 0.11559500  |
| C | -2.03059300 | 1.16036100  | 2.84634000  |
| H | -2.16755900 | -0.94235800 | 2.37386000  |
| C | -2.11475800 | 2.65244400  | 0.95839700  |
| C | -1.99609200 | 2.45250300  | 2.32848400  |
| H | -1.96247500 | 0.99828700  | 3.92100700  |
| H | -2.07829600 | 3.65108200  | 0.53027300  |
| H | -1.88196600 | 3.30957500  | 2.98832300  |
| H | -1.24379800 | -3.07613200 | 0.06933800  |
| H | -1.07095400 | -1.19366000 | -2.33265000 |
| C | 3.60255900  | -1.32554000 | 0.33067300  |
| H | 3.52599800  | -0.23157300 | 0.25348600  |
| H | 4.66292100  | -1.59445300 | 0.22178200  |
| C | 3.04702900  | -1.80719700 | 1.66648300  |
| H | 3.69586600  | -1.52897200 | 2.50972300  |
| H | 2.96564800  | -2.90508500 | 1.67684900  |

|    |             |             |             |
|----|-------------|-------------|-------------|
| C  | 0.70337300  | -2.18954700 | 3.35122700  |
| C  | 1.66077100  | 0.32700500  | 3.06045700  |
| C  | 0.58485400  | -1.26522300 | 4.56684700  |
| H  | 1.43125500  | -2.99060900 | 3.53744100  |
| H  | -0.24540300 | -2.66264500 | 3.07635800  |
| C  | 1.71621500  | -0.24458400 | 4.47455400  |
| H  | 0.81350800  | 1.01907400  | 2.95556500  |
| H  | 2.56576400  | 0.85813400  | 2.74252600  |
| H  | -0.37713500 | -0.73313100 | 4.52868600  |
| H  | 0.60368300  | -1.82741100 | 5.50792000  |
| H  | 1.62787900  | 0.53923000  | 5.23678600  |
| H  | 2.68058600  | -0.74790900 | 4.64356000  |
| P  | 1.33870500  | -1.12694200 | 1.95006700  |
| C  | 3.32763800  | -1.12281100 | -2.53806600 |
| C  | 3.64527100  | -3.56775500 | -1.42786600 |
| C  | 4.13387400  | -2.14125600 | -3.34557600 |
| H  | 3.97065100  | -0.31872100 | -2.15565900 |
| H  | 2.53317800  | -0.64791000 | -3.12246200 |
| C  | 4.76916800  | -3.10865700 | -2.35315400 |
| H  | 3.01486200  | -4.31279200 | -1.93000300 |
| H  | 3.99752500  | -4.01965400 | -0.49185200 |
| H  | 3.46042700  | -2.70347500 | -4.00944600 |
| H  | 4.87749100  | -1.65377100 | -3.98788500 |
| H  | 5.26524900  | -3.95043200 | -2.85349700 |
| H  | 5.54255400  | -2.58213900 | -1.77340300 |
| P  | 2.59547000  | -2.04489200 | -1.07552100 |
| Cl | -2.43413900 | 1.85982100  | -1.59610400 |

#### 4u-Ar-ts

|    |             |             |             |
|----|-------------|-------------|-------------|
| Cu | 1.20209200  | 0.26895600  | 0.08520100  |
| C  | -0.12032700 | -0.51446400 | 1.37665300  |
| H  | -0.09020000 | -0.32196100 | 2.45512600  |
| C  | -0.90593700 | -1.51457900 | 0.93055000  |
| H  | -0.95537200 | -1.70159700 | -0.14843700 |
| C  | -1.72736400 | -2.44184000 | 1.71089100  |
| C  | -2.25929200 | -3.57199800 | 1.07381100  |
| C  | -2.02128700 | -2.25399900 | 3.06900600  |
| C  | -3.03693700 | -4.49147600 | 1.76676300  |
| H  | -2.05009400 | -3.71818400 | 0.01200800  |
| C  | -2.79753700 | -3.17080600 | 3.76215900  |
| H  | -1.64704800 | -1.36537500 | 3.57524900  |
| C  | -3.30734400 | -4.29715900 | 3.11759300  |
| H  | -3.43608300 | -5.36228900 | 1.25016300  |
| H  | -3.01717300 | -3.00296800 | 4.81481400  |

|   |             |             |             |
|---|-------------|-------------|-------------|
| H | -3.91822400 | -5.01213000 | 3.66412700  |
| C | -0.24031900 | 1.51757700  | 0.67151400  |
| C | 0.34456700  | 2.04615300  | -0.50385800 |
| C | -1.14970100 | 1.86536100  | -0.47752900 |
| C | -1.95508900 | 3.12447400  | -0.32843200 |
| C | -1.54602000 | 4.13740200  | 0.54787000  |
| C | -3.09321100 | 3.35911300  | -1.10786400 |
| C | -2.25942500 | 5.32457600  | 0.65888600  |
| H | -0.64854400 | 4.00148000  | 1.14811000  |
| C | -3.80167800 | 4.55013700  | -1.00580000 |
| H | -3.43018500 | 2.59496000  | -1.80568000 |
| C | -3.39308700 | 5.53932000  | -0.11783900 |
| H | -1.92171800 | 6.08994600  | 1.35500800  |
| H | -4.68236100 | 4.70349700  | -1.62620500 |
| H | -3.94944400 | 6.47024600  | -0.03522800 |
| C | -1.79850000 | 0.75332000  | -1.24314400 |
| C | -1.27144100 | 0.33375400  | -2.46495000 |
| C | -2.92010200 | 0.06559400  | -0.76360100 |
| C | -1.81957000 | -0.73069800 | -3.17358300 |
| H | -0.39627500 | 0.86673700  | -2.83594700 |
| C | -3.47542100 | -1.00938200 | -1.44961600 |
| C | -2.91868000 | -1.41233100 | -2.65821000 |
| H | -1.39219900 | -1.02739800 | -4.13043600 |
| H | -4.32762700 | -1.52989700 | -1.01988200 |
| H | -3.35188100 | -2.25141600 | -3.19812900 |
| H | 0.84876000  | 3.00351600  | -0.61019900 |
| H | -0.33067200 | 1.87705800  | 1.69487700  |
| C | 4.36202700  | -0.77507300 | 0.06864800  |
| H | 4.21832100  | -1.59625900 | 0.78710500  |
| H | 5.44062200  | -0.56369200 | 0.03628700  |
| C | 3.83343600  | -1.17989700 | -1.30318100 |
| H | 4.31720800  | -2.09922500 | -1.66448700 |
| H | 4.04152300  | -0.39285100 | -2.04336200 |
| C | 1.59347200  | -1.85142400 | -3.03490600 |
| C | 1.78580600  | -3.13811200 | -0.65328000 |
| C | 0.91231300  | -3.21639600 | -2.93754200 |
| H | 2.53074700  | -1.92090900 | -3.60487200 |
| H | 0.96231900  | -1.08982600 | -3.50265400 |
| C | 1.68616400  | -4.02028700 | -1.89652400 |
| H | 0.86365800  | -3.17480000 | -0.05779000 |
| H | 2.61205400  | -3.40540900 | 0.01683000  |
| H | -0.12669300 | -3.07944500 | -2.59585100 |
| H | 0.86903000  | -3.72004700 | -3.91096900 |
| H | 1.20905900  | -4.98306700 | -1.67666400 |

|    |             |             |             |
|----|-------------|-------------|-------------|
| H  | 2.69239000  | -4.24074800 | -2.28544800 |
| P  | 1.98522300  | -1.39102900 | -1.26907300 |
| C  | 4.29850700  | 0.88136200  | 2.42530300  |
| C  | 4.36781600  | 2.11249900  | 0.01276500  |
| C  | 5.03695200  | 2.22042000  | 2.35902200  |
| H  | 5.00651200  | 0.05074700  | 2.55039800  |
| H  | 3.58083000  | 0.83018200  | 3.24915900  |
| C  | 5.55507900  | 2.38235500  | 0.93325400  |
| H  | 3.69122500  | 2.97620800  | -0.02093200 |
| H  | 4.64524800  | 1.88112200  | -1.02287200 |
| H  | 4.33698900  | 3.03916800  | 2.58088700  |
| H  | 5.83957000  | 2.27748300  | 3.10412600  |
| H  | 5.99358600  | 3.37324300  | 0.76216000  |
| H  | 6.35075700  | 1.64499500  | 0.74727900  |
| P  | 3.43397200  | 0.68527000  | 0.77114700  |
| Cl | -3.66320200 | 0.52497500  | 0.75302400  |

**4u-Ar-pro**

|    |             |             |             |
|----|-------------|-------------|-------------|
| Cu | 0.44968700  | -0.55247200 | 1.45825400  |
| C  | -0.54917700 | -1.14305000 | -1.57721000 |
| H  | -0.49367000 | -1.78529200 | -2.46136600 |
| C  | 0.22492100  | -0.04312000 | -1.55752100 |
| H  | 0.12036000  | 0.65614400  | -0.72195500 |
| C  | 1.17926600  | 0.36090600  | -2.58820400 |
| C  | 1.53062300  | 1.71487700  | -2.70231100 |
| C  | 1.79375400  | -0.54897600 | -3.46285600 |
| C  | 2.45069400  | 2.14466900  | -3.65070600 |
| H  | 1.04052600  | 2.43591800  | -2.04663800 |
| C  | 2.71027800  | -0.11921600 | -4.41359900 |
| H  | 1.55587400  | -1.60912300 | -3.38317500 |
| C  | 3.04785100  | 1.22878700  | -4.51184100 |
| H  | 2.69728800  | 3.20212700  | -3.72316600 |
| H  | 3.17303500  | -0.84483700 | -5.07971700 |
| H  | 3.77074000  | 1.56115700  | -5.25316500 |
| C  | -1.50336300 | -1.58601500 | -0.54598200 |
| C  | -1.28804400 | -1.29159800 | 0.94090400  |
| C  | -2.42487400 | -0.63223300 | 0.21027200  |
| C  | -3.81726800 | -1.11550400 | 0.52066600  |
| C  | -4.40344200 | -0.71976600 | 1.72828100  |
| C  | -4.54925800 | -1.94859900 | -0.32601600 |
| C  | -5.67684300 | -1.14547200 | 2.08192000  |
| H  | -3.83760600 | -0.07205700 | 2.39819300  |
| C  | -5.82443300 | -2.38219200 | 0.02725600  |
| H  | -4.11899600 | -2.25275000 | -1.27806500 |



|   |             |             |             |
|---|-------------|-------------|-------------|
| C | -6.39402200 | -1.98268700 | 1.23045400  |
| H | -6.11084900 | -0.82762900 | 3.02799500  |
| H | -6.37772200 | -3.03166100 | -0.64839000 |
| H | -7.39113200 | -2.32043700 | 1.50474300  |
| C | -2.37652500 | 0.83979500  | -0.07414400 |
| C | -1.95418100 | 1.72906700  | 0.92058600  |
| C | -2.76476800 | 1.40676300  | -1.29264200 |
| C | -1.89486300 | 3.10172600  | 0.70921900  |
| H | -1.64031900 | 1.29850100  | 1.87171500  |
| C | -2.68406600 | 2.77478000  | -1.53673100 |
| C | -2.24430900 | 3.62685000  | -0.53192700 |
| H | -1.57370800 | 3.76341700  | 1.51276700  |
| H | -2.97533500 | 3.15819200  | -2.51102600 |
| H | -2.18958200 | 4.69707800  | -0.71759200 |
| H | -1.66110800 | -2.12130300 | 1.55204800  |
| H | -1.98293400 | -2.53270000 | -0.80051100 |
| C | 3.58657500  | -0.41797100 | 0.44528300  |
| H | 3.21198300  | 0.06116000  | -0.47393600 |
| H | 4.60241200  | -0.77737700 | 0.22833700  |
| C | 3.58417800  | 0.57009200  | 1.60911700  |
| H | 4.25583400  | 1.42124100  | 1.42581300  |
| H | 3.93189100  | 0.07859600  | 2.53083200  |
| C | 2.03703400  | 2.17268600  | 3.50272200  |
| C | 1.77426400  | 2.68789000  | 0.84914600  |
| C | 1.66210700  | 3.60357600  | 3.11345200  |
| H | 3.08474500  | 2.12022600  | 3.82974900  |
| H | 1.41328700  | 1.76735100  | 4.30444400  |
| C | 2.23900600  | 3.85086900  | 1.72348600  |
| H | 0.73087000  | 2.82825900  | 0.53448200  |
| H | 2.37476500  | 2.53662600  | -0.05713000 |
| H | 0.56606800  | 3.69587500  | 3.07118500  |
| H | 2.01740600  | 4.33119800  | 3.85275400  |
| H | 1.92770300  | 4.81840800  | 1.31115000  |
| H | 3.33803500  | 3.86538400  | 1.78335000  |
| P | 1.85147100  | 1.17407000  | 1.93427600  |
| C | 2.56929100  | -2.86206500 | -0.75273500 |
| C | 3.61547900  | -2.97648000 | 1.74284900  |
| C | 3.32311700  | -4.14206400 | -0.38371800 |
| H | 3.11486800  | -2.27279300 | -1.50317000 |
| H | 1.56689700  | -3.05105000 | -1.15172800 |
| C | 4.35843600  | -3.77492400 | 0.67407100  |
| H | 3.02213900  | -3.64233900 | 2.38177300  |
| H | 4.27354700  | -2.39470500 | 2.40007600  |
| H | 2.62082200  | -4.87332300 | 0.04210700  |

|    |             |             |             |
|----|-------------|-------------|-------------|
| H  | 3.77688800  | -4.61285800 | -1.26410000 |
| H  | 4.85585600  | -4.65927700 | 1.09211200  |
| H  | 5.14335000  | -3.15233000 | 0.21871900  |
| P  | 2.44160700  | -1.84900400 | 0.81526400  |
| Cl | -3.37035100 | 0.39966300  | -2.59183700 |

**4u-Ph-ini**

|    |             |             |             |
|----|-------------|-------------|-------------|
| Cu | -0.20491600 | -0.28475500 | -0.16677400 |
| C  | -1.51220300 | 0.78096500  | 0.81109300  |
| H  | -1.73758300 | 0.53840400  | 1.86389100  |
| C  | -2.24255100 | 1.77951300  | 0.28065000  |
| H  | -2.06720300 | 2.05691200  | -0.76879500 |
| C  | -3.32314400 | 2.55672600  | 0.90691400  |
| C  | -4.12564100 | 3.38078200  | 0.10656400  |
| C  | -3.60566400 | 2.50992200  | 2.27971500  |
| C  | -5.17299600 | 4.11844200  | 0.64538800  |
| H  | -3.91504300 | 3.43497000  | -0.96246500 |
| C  | -4.64940300 | 3.24589300  | 2.82150700  |
| H  | -2.98596900 | 1.89188700  | 2.92792700  |
| C  | -5.44254700 | 4.05404600  | 2.00842600  |
| H  | -5.78053600 | 4.74815400  | -0.00200300 |
| H  | -4.84507000 | 3.19499800  | 3.89118800  |
| H  | -6.25895400 | 4.63153100  | 2.43643900  |
| C  | 1.04629500  | 0.96288600  | -1.08098800 |
| C  | 1.40603600  | -0.31070700 | -1.40998300 |
| C  | 2.37138700  | 0.47448300  | -0.56096100 |
| C  | 2.57349000  | 0.09336200  | 0.88181700  |
| C  | 1.87226700  | 0.71319000  | 1.91751800  |
| C  | 3.47587500  | -0.92707700 | 1.19657500  |
| C  | 2.05368100  | 0.30498800  | 3.23673700  |
| H  | 1.17098000  | 1.51013100  | 1.67778400  |
| C  | 3.66455800  | -1.33189100 | 2.51349100  |
| H  | 4.03723100  | -1.40344500 | 0.39167200  |
| C  | 2.94910400  | -0.71705200 | 3.53944700  |
| H  | 1.50001300  | 0.79906700  | 4.03292400  |
| H  | 4.37214600  | -2.12692700 | 2.74163200  |
| H  | 3.09560700  | -1.02954500 | 4.57140700  |
| C  | 3.61052200  | 0.99797900  | -1.23394900 |
| C  | 4.32265500  | 0.19783800  | -2.13209700 |
| C  | 4.11204900  | 2.28102400  | -0.99436100 |
| C  | 5.48067100  | 0.64551500  | -2.75587100 |
| H  | 3.94671000  | -0.80381400 | -2.33865400 |
| C  | 5.26707600  | 2.74967100  | -1.61017000 |
| C  | 5.95519400  | 1.92589200  | -2.49244400 |

|    |             |             |             |
|----|-------------|-------------|-------------|
| H  | 6.01149200  | -0.00462900 | -3.44710900 |
| H  | 5.61336500  | 3.75717200  | -1.39552000 |
| H  | 6.85868400  | 2.29015700  | -2.97524100 |
| C  | -2.05307000 | -3.01757900 | 0.28528900  |
| H  | -2.78727600 | -2.36882900 | 0.78723300  |
| H  | -2.18373000 | -4.02889500 | 0.69780800  |
| C  | -2.27226400 | -3.00276900 | -1.22281600 |
| H  | -3.25789500 | -3.42303300 | -1.47148600 |
| H  | -1.52554500 | -3.63957300 | -1.72202600 |
| C  | -2.54528800 | -1.73348100 | -3.76215100 |
| C  | -3.81362500 | -0.62334000 | -1.64416100 |
| C  | -3.87364500 | -1.03147300 | -4.05114600 |
| H  | -2.65667100 | -2.82368300 | -3.84449200 |
| H  | -1.75082500 | -1.43089000 | -4.45141400 |
| C  | -4.70824900 | -1.11356600 | -2.77820400 |
| H  | -3.75022600 | 0.47281500  | -1.62695400 |
| H  | -4.15122700 | -0.92184200 | -0.64420600 |
| H  | -3.68738700 | 0.02617200  | -4.28919600 |
| H  | -4.38477500 | -1.46776700 | -4.91842800 |
| H  | -5.63474300 | -0.53033800 | -2.85098700 |
| H  | -5.00436300 | -2.15947700 | -2.60407600 |
| P  | -2.09924300 | -1.29478200 | -1.98138300 |
| C  | -0.42842400 | -2.46896100 | 2.62185000  |
| C  | 0.73304000  | -3.80864300 | 0.57036100  |
| C  | 0.57764800  | -3.56298100 | 2.99695900  |
| H  | -1.44928500 | -2.73011000 | 2.93167200  |
| H  | -0.17800100 | -1.49955100 | 3.06686600  |
| C  | 0.59663500  | -4.59514300 | 1.87222900  |
| H  | 1.75428300  | -3.41949600 | 0.45338100  |
| H  | 0.48737100  | -4.38258000 | -0.33124400 |
| H  | 1.57622400  | -3.11093300 | 3.08429400  |
| H  | 0.34024700  | -4.01303900 | 3.96818800  |
| H  | 1.40585900  | -5.32506700 | 1.99827000  |
| H  | -0.34651000 | -5.16256600 | 1.86973300  |
| P  | -0.39269000 | -2.34308400 | 0.76258900  |
| H  | 0.67488100  | 1.88966500  | -1.50392100 |
| H  | 1.46316100  | -0.96510600 | -2.27265200 |
| Cl | 3.26796100  | 3.36378100  | 0.09220900  |

#### 4u-Ph-ts

|    |             |             |             |
|----|-------------|-------------|-------------|
| Cu | -0.75634800 | -0.55890400 | -0.69571900 |
| C  | -0.20198000 | 1.04236900  | 0.37695700  |
| H  | 0.31615500  | 0.78881000  | 1.31008000  |
| C  | -0.59537800 | 2.31847300  | 0.21235200  |

|   |             |             |             |
|---|-------------|-------------|-------------|
| H | -1.08419300 | 2.60468500  | -0.72713600 |
| C | -0.44821200 | 3.41847400  | 1.17009000  |
| C | -1.21380200 | 4.58120400  | 1.00702800  |
| C | 0.43784500  | 3.36460900  | 2.25667800  |
| C | -1.11772400 | 5.64029900  | 1.90086200  |
| H | -1.90120100 | 4.64036300  | 0.16208000  |
| C | 0.53580400  | 4.42188500  | 3.14953600  |
| H | 1.06707900  | 2.48449100  | 2.38614200  |
| C | -0.24318200 | 5.56534200  | 2.98046900  |
| H | -1.72706700 | 6.52989200  | 1.75319300  |
| H | 1.23471700  | 4.35979500  | 3.98154500  |
| H | -0.16133600 | 6.39382200  | 3.68041200  |
| C | 0.96844000  | 0.23687700  | -1.26743600 |
| C | 0.90730900  | -1.06922200 | -1.80461400 |
| C | 2.02159800  | -0.73700000 | -0.84714300 |
| C | 2.06011900  | -1.39150200 | 0.50977600  |
| C | 2.55751200  | -0.72124900 | 1.63130600  |
| C | 1.64127600  | -2.71524600 | 0.65474800  |
| C | 2.61643500  | -1.35369300 | 2.86967300  |
| H | 2.89621900  | 0.30920200  | 1.52706200  |
| C | 1.71847600  | -3.35809700 | 1.88700900  |
| H | 1.24408700  | -3.22618700 | -0.22248000 |
| C | 2.20061300  | -2.67643700 | 3.00169900  |
| H | 2.99810000  | -0.81403000 | 3.73408600  |
| H | 1.40298300  | -4.39724800 | 1.97810400  |
| H | 2.25653500  | -3.17526300 | 3.96741100  |
| C | 3.39770000  | -0.51601700 | -1.41952500 |
| C | 4.00935100  | -1.58116900 | -2.09147700 |
| C | 4.12981500  | 0.67092300  | -1.32550500 |
| C | 5.27457900  | -1.47251400 | -2.65007000 |
| H | 3.45239600  | -2.51499100 | -2.16756800 |
| C | 5.39755200  | 0.80341100  | -1.88641200 |
| C | 5.97114300  | -0.27157100 | -2.55073400 |
| H | 5.71637600  | -2.32210500 | -3.16528400 |
| H | 5.92320900  | 1.74999400  | -1.79201600 |
| H | 6.96164600  | -0.16853500 | -2.98724200 |
| C | -3.53231300 | -1.11700100 | 0.78967400  |
| H | -3.48452900 | -0.08217500 | 1.16258700  |
| H | -4.22561600 | -1.66640900 | 1.44192400  |
| C | -3.99642000 | -1.13933700 | -0.66271500 |
| H | -5.02414100 | -0.76233900 | -0.76535200 |
| H | -3.99560500 | -2.17068100 | -1.04745400 |
| C | -3.53473900 | -0.55293100 | -3.45118400 |
| C | -3.65074000 | 1.51610900  | -1.71018200 |

|    |             |             |             |
|----|-------------|-------------|-------------|
| C  | -4.15653700 | 0.74705900  | -3.96887000 |
| H  | -4.29828800 | -1.33482500 | -3.34055900 |
| H  | -2.75529500 | -0.94452700 | -4.11116600 |
| C  | -4.74927400 | 1.47803800  | -2.76809100 |
| H  | -2.89491800 | 2.26967200  | -1.96714500 |
| H  | -3.99921500 | 1.74560600  | -0.69541100 |
| H  | -3.37454500 | 1.37575200  | -4.41891900 |
| H  | -4.90077500 | 0.55653900  | -4.75147000 |
| H  | -5.10440200 | 2.48258700  | -3.02949600 |
| H  | -5.62001500 | 0.92012300  | -2.39145000 |
| P  | -2.83552000 | -0.16349800 | -1.75358400 |
| C  | -1.42824700 | -1.56178100 | 2.73765200  |
| C  | -2.14100000 | -3.60976900 | 1.11871300  |
| C  | -1.56840000 | -2.93781600 | 3.40417800  |
| H  | -2.13719400 | -0.82815800 | 3.14266700  |
| H  | -0.42012200 | -1.14960600 | 2.86162300  |
| C  | -2.53530500 | -3.78824600 | 2.58305800  |
| H  | -1.21530600 | -4.15389300 | 0.89039200  |
| H  | -2.90448000 | -3.94264800 | 0.40536100  |
| H  | -0.58328100 | -3.42376600 | 3.40934300  |
| H  | -1.88663600 | -2.84967800 | 4.44969600  |
| H  | -2.51214700 | -4.84161000 | 2.88989100  |
| H  | -3.56703900 | -3.43826200 | 2.73687000  |
| P  | -1.79969000 | -1.79095100 | 0.92365000  |
| H  | 1.10027500  | 1.22053800  | -1.70310800 |
| H  | 0.99567400  | -1.33770800 | -2.85314700 |
| Cl | 3.48707300  | 2.07240400  | -0.47848200 |

#### 4u-Ph-pro

|    |             |             |             |
|----|-------------|-------------|-------------|
| Cu | 0.41284600  | 0.25692000  | -1.45432300 |
| C  | -0.34556700 | -1.29009100 | 0.93830300  |
| H  | -0.06218000 | -0.24638900 | 1.10073300  |
| C  | 0.38155200  | -2.25294800 | 1.52894200  |
| H  | 0.12108400  | -3.29904700 | 1.34664600  |
| C  | 1.59402100  | -2.01741200 | 2.30898200  |
| C  | 2.47176400  | -3.08221500 | 2.55678500  |
| C  | 1.96898700  | -0.74515800 | 2.77395900  |
| C  | 3.68592000  | -2.88482300 | 3.20398600  |
| H  | 2.19611000  | -4.07832700 | 2.21039600  |
| C  | 3.18419400  | -0.54620800 | 3.41546600  |
| H  | 1.28998100  | 0.09766200  | 2.64241800  |
| C  | 4.05631800  | -1.61276100 | 3.62897900  |
| H  | 4.34917400  | -3.73060600 | 3.37403400  |
| H  | 3.44875000  | 0.45155800  | 3.76367000  |

|   |             |             |             |
|---|-------------|-------------|-------------|
| H | 5.00647000  | -1.45445700 | 4.13350100  |
| C | -1.42919200 | -1.48058800 | -0.02266200 |
| C | -1.29984400 | -0.68551400 | -1.33977300 |
| C | -2.39336400 | -0.36779000 | -0.35363900 |
| C | -2.36681400 | 0.95007100  | 0.37463500  |
| C | -2.45609900 | 1.04474900  | 1.76569100  |
| C | -2.30674000 | 2.13446200  | -0.36766600 |
| C | -2.48863400 | 2.28742200  | 2.39654000  |
| H | -2.50225200 | 0.13163300  | 2.35618900  |
| C | -2.35582800 | 3.37583900  | 0.25559800  |
| H | -2.21219600 | 2.06295700  | -1.45114400 |
| C | -2.44650900 | 3.45711900  | 1.64459500  |
| H | -2.55766000 | 2.33892800  | 3.48136200  |
| H | -2.32312800 | 4.28569500  | -0.34288800 |
| H | -2.48150700 | 4.42776800  | 2.13599300  |
| C | -3.79447100 | -0.78547200 | -0.70827600 |
| C | -4.31025100 | -0.42014400 | -1.95809200 |
| C | -4.65685400 | -1.49170600 | 0.13685000  |
| C | -5.60385400 | -0.73587700 | -2.34815700 |
| H | -3.65080600 | 0.12289600  | -2.63384500 |
| C | -5.95463500 | -1.82809700 | -0.23742100 |
| C | -6.43121200 | -1.44606200 | -1.48391300 |
| H | -5.96486600 | -0.43278000 | -3.32824100 |
| H | -6.57894800 | -2.38629900 | 0.45532700  |
| H | -7.44547400 | -1.70697200 | -1.77656900 |
| C | 3.23548300  | 1.48039100  | -0.19619500 |
| H | 3.24346100  | 0.77714300  | 0.65255700  |
| H | 3.88189100  | 2.32414300  | 0.08428500  |
| C | 3.73821800  | 0.78830600  | -1.45846200 |
| H | 4.73964500  | 0.36090000  | -1.30524600 |
| H | 3.81902900  | 1.50661200  | -2.28842700 |
| C | 3.42396400  | -1.25182600 | -3.49782000 |
| C | 3.03749000  | -1.94890600 | -0.90157600 |
| C | 3.80296300  | -2.68259100 | -3.10498300 |
| H | 4.32063600  | -0.64760600 | -3.69283600 |
| H | 2.79231900  | -1.20851300 | -4.38961000 |
| C | 4.17508800  | -2.66313400 | -1.62617900 |
| H | 2.16292000  | -2.60251000 | -0.78158800 |
| H | 3.29878100  | -1.59001200 | 0.10314300  |
| H | 2.93611800  | -3.34362200 | -3.24832800 |
| H | 4.61070600  | -3.07263300 | -3.73608000 |
| H | 4.34224100  | -3.67083600 | -1.22645900 |
| H | 5.11557900  | -2.10720700 | -1.49210800 |
| P | 2.54010600  | -0.53361300 | -2.00881800 |

|    |             |             |             |
|----|-------------|-------------|-------------|
| C  | 1.14499100  | 2.77090200  | 1.31903100  |
| C  | 1.67332100  | 3.71258900  | -1.16682700 |
| C  | 1.09313500  | 4.29250800  | 1.13443300  |
| H  | 1.97142600  | 2.47079500  | 1.97908900  |
| H  | 0.21143100  | 2.37960500  | 1.74196600  |
| C  | 2.01241100  | 4.66635400  | -0.02377100 |
| H  | 0.71712700  | 3.98635100  | -1.63238800 |
| H  | 2.42887500  | 3.67644300  | -1.96084400 |
| H  | 0.06223900  | 4.58006400  | 0.88291500  |
| H  | 1.35612700  | 4.81872800  | 2.05986200  |
| H  | 1.89515200  | 5.71667100  | -0.31873600 |
| H  | 3.06359600  | 4.53608400  | 0.27430500  |
| P  | 1.46171000  | 2.03948700  | -0.37503400 |
| H  | -1.84114800 | -2.49176600 | -0.06703100 |
| H  | -1.66547500 | -1.28561400 | -2.17913000 |
| Cl | -4.13733600 | -2.01085700 | 1.73423900  |

**4v-ini**

|   |             |             |             |
|---|-------------|-------------|-------------|
| C | -0.14062100 | 2.38046400  | 0.77163900  |
| C | -0.14458200 | 2.53344300  | -0.51042900 |
| C | -0.08949200 | 1.10843300  | -0.02946000 |
| C | -1.33315300 | 0.26956600  | -0.15349300 |
| C | -2.54577900 | 0.70447000  | 0.38722300  |
| C | -1.31066100 | -0.95500100 | -0.82811300 |
| C | -3.70065000 | -0.05846800 | 0.26256200  |
| H | -2.58301300 | 1.65923700  | 0.91057400  |
| C | -2.46587200 | -1.71820700 | -0.95809300 |
| H | -0.37321800 | -1.31276100 | -1.25140800 |
| C | -3.66636200 | -1.27482700 | -0.41250300 |
| H | -4.63216100 | 0.29781600  | 0.69768100  |
| H | -2.42610300 | -2.66691100 | -1.48937300 |
| H | -4.56890500 | -1.87360200 | -0.51140400 |
| C | 1.21733100  | 0.36641100  | -0.10732700 |
| C | 2.06382400  | 0.56330800  | -1.19695000 |
| C | 1.60505900  | -0.51787200 | 0.91602600  |
| C | 3.28477700  | -0.09559200 | -1.29492700 |
| H | 1.75471400  | 1.25486500  | -1.98080400 |
| C | 2.83424700  | -1.16869000 | 0.80816800  |
| C | 3.67128000  | -0.96736800 | -0.28456600 |
| H | 3.92921200  | 0.07292700  | -2.15485100 |
| H | 3.14000000  | -1.84656200 | 1.60488400  |
| H | 4.62470300  | -1.48794800 | -0.34212000 |
| H | -0.19505900 | 3.16536900  | -1.38487400 |
| H | -0.17309500 | 2.79204700  | 1.77030000  |

|   |             |             |            |
|---|-------------|-------------|------------|
| C | 0.72693500  | -0.76459400 | 2.10717800 |
| H | 0.39800400  | 0.17364200  | 2.57135600 |
| H | -0.18526900 | -1.30940300 | 1.83093800 |
| H | 1.25251200  | -1.35157300 | 2.86749100 |

**4v-Ar-ini**

|    |             |             |             |
|----|-------------|-------------|-------------|
| Cu | 0.06993500  | -0.66078000 | -0.07381700 |
| C  | 1.27599300  | 0.70925200  | -0.76354500 |
| H  | 1.97230300  | 0.46039700  | -1.57992600 |
| C  | 1.32442200  | 1.99197700  | -0.35864800 |
| H  | 0.61535700  | 2.33942600  | 0.40542600  |
| C  | 2.18942000  | 3.05898600  | -0.88378800 |
| C  | 1.82492600  | 4.39800200  | -0.69177400 |
| C  | 3.37997200  | 2.79918600  | -1.57692800 |
| C  | 2.60167400  | 5.43703900  | -1.18981800 |
| H  | 0.90393800  | 4.61347400  | -0.14802900 |
| C  | 4.15869400  | 3.83432000  | -2.07505100 |
| H  | 3.69792700  | 1.76503900  | -1.71207900 |
| C  | 3.77366600  | 5.16052200  | -1.88721100 |
| H  | 2.29132600  | 6.46845800  | -1.03293900 |
| H  | 5.08072000  | 3.60742600  | -2.60745700 |
| H  | 4.38707600  | 5.97065000  | -2.27537100 |
| C  | -1.39047100 | -0.85660300 | -1.39886800 |
| C  | -1.68167100 | -1.65373300 | -0.33080100 |
| C  | -2.57238900 | -0.44944800 | -0.55420600 |
| C  | -3.92974800 | -0.70646200 | -1.14081800 |
| C  | -5.02770500 | 0.10394800  | -0.83085700 |
| C  | -4.13119300 | -1.77690200 | -2.02238300 |
| C  | -6.27959300 | -0.14626100 | -1.38206000 |
| H  | -4.89746200 | 0.94216200  | -0.14898400 |
| C  | -5.38210900 | -2.02730100 | -2.57201800 |
| H  | -3.29575700 | -2.42530600 | -2.28014400 |
| C  | -6.46480600 | -1.21288900 | -2.25483000 |
| H  | -7.11652100 | 0.49971900  | -1.12497800 |
| H  | -5.51127000 | -2.86565900 | -3.25356900 |
| H  | -7.44442100 | -1.40837900 | -2.68489800 |
| C  | -2.46500600 | 0.72070100  | 0.38380000  |
| C  | -2.65791000 | 0.51137600  | 1.75114000  |
| C  | -2.21674300 | 2.02200800  | -0.08700900 |
| C  | -2.58977400 | 1.56106100  | 2.66194300  |
| H  | -2.87063500 | -0.50238500 | 2.09442000  |
| C  | -2.13345000 | 3.06353400  | 0.84118000  |
| C  | -2.31476500 | 2.84537100  | 2.20266800  |
| H  | -2.76633100 | 1.38114100  | 3.72122500  |



|   |             |             |             |
|---|-------------|-------------|-------------|
| H | -1.93124000 | 4.07106600  | 0.47725700  |
| H | -2.25558500 | 3.67842800  | 2.89982800  |
| H | -1.85301800 | -2.70223300 | -0.11025100 |
| H | -1.20104300 | -0.90268100 | -2.46626000 |
| C | 3.14644200  | -1.73281300 | 0.75109800  |
| H | 3.26231600  | -0.66300200 | 0.52324200  |
| H | 4.15398700  | -2.16862200 | 0.81562800  |
| C | 2.38613800  | -1.92114600 | 2.05847100  |
| H | 2.98317000  | -1.60997700 | 2.92815900  |
| H | 2.14060600  | -2.98371300 | 2.20918100  |
| C | -0.10947300 | -1.74129700 | 3.52341700  |
| C | 1.19116700  | 0.57122400  | 2.97129300  |
| C | -0.19377100 | -0.63719800 | 4.58220200  |
| H | 0.48234700  | -2.59218400 | 3.88673800  |
| H | -1.09132200 | -2.12402300 | 3.22531400  |
| C | 1.06014000  | 0.22419400  | 4.45168600  |
| H | 0.45054600  | 1.32876600  | 2.67668900  |
| H | 2.17755500  | 0.94103400  | 2.66907400  |
| H | -1.07291400 | -0.00962000 | 4.38010100  |
| H | -0.31425800 | -1.05085600 | 5.59049900  |
| H | 1.00871100  | 1.12193100  | 5.07965500  |
| H | 1.93905900  | -0.34902800 | 4.78526400  |
| P | 0.77605300  | -0.98827900 | 2.05898900  |
| C | 3.29493800  | -1.97250800 | -2.11184400 |
| C | 2.96402200  | -4.21658300 | -0.64111900 |
| C | 3.95060200  | -3.24498400 | -2.64960700 |
| H | 4.05345600  | -1.27131000 | -1.73606500 |
| H | 2.70876100  | -1.44198500 | -2.86939900 |
| C | 4.25590300  | -4.13473800 | -1.45023000 |
| H | 2.25987100  | -4.91413800 | -1.11239800 |
| H | 3.11047900  | -4.55516000 | 0.39245700  |
| H | 3.24976000  | -3.77010500 | -3.31551600 |
| H | 4.84541100  | -3.02134400 | -3.24340900 |
| H | 4.62107200  | -5.12559900 | -1.74966200 |
| H | 5.05033200  | -3.67177200 | -0.84538600 |
| P | 2.20002700  | -2.49665500 | -0.67411000 |
| C | -2.01204700 | 2.29723300  | -1.54510000 |
| H | -2.79370800 | 1.83614600  | -2.16139100 |
| H | -2.00753800 | 3.37455900  | -1.74302500 |
| H | -1.04534700 | 1.89148300  | -1.87381200 |

**4v-Ar-ts**

|    |             |             |            |
|----|-------------|-------------|------------|
| Cu | 1.12669600  | 0.24126100  | 0.09804500 |
| C  | -0.20630500 | -0.48917300 | 1.41114600 |

|   |             |             |             |
|---|-------------|-------------|-------------|
| H | -0.15273400 | -0.28813300 | 2.48790400  |
| C | -1.04471900 | -1.45655800 | 0.98688900  |
| H | -1.12038400 | -1.65024200 | -0.08880300 |
| C | -1.90549400 | -2.32652200 | 1.79093900  |
| C | -2.52314100 | -3.42309700 | 1.17190600  |
| C | -2.16290100 | -2.11146900 | 3.15286200  |
| C | -3.34804700 | -4.28365700 | 1.88527900  |
| H | -2.34441100 | -3.58850300 | 0.10769900  |
| C | -2.98659600 | -2.96988200 | 3.86648700  |
| H | -1.71786200 | -1.24945600 | 3.64842600  |
| C | -3.58176700 | -4.06347500 | 3.23926400  |
| H | -3.81338100 | -5.12893800 | 1.38186400  |
| H | -3.17449000 | -2.78168400 | 4.92189000  |
| H | -4.22894100 | -4.73289000 | 3.80144400  |
| C | -0.27773200 | 1.52900200  | 0.69404900  |
| C | 0.31624400  | 2.04620800  | -0.48020900 |
| C | -1.18299100 | 1.89709900  | -0.45751400 |
| C | -1.95654200 | 3.17462300  | -0.28845500 |
| C | -1.52226900 | 4.16908200  | 0.59799700  |
| C | -3.09766200 | 3.44282300  | -1.05467400 |
| C | -2.21372500 | 5.36643100  | 0.73407700  |
| H | -0.61964300 | 4.01065900  | 1.18482000  |
| C | -3.78545800 | 4.64421900  | -0.92639200 |
| H | -3.44825400 | 2.69554100  | -1.76434700 |
| C | -3.35214600 | 5.61218100  | -0.02670200 |
| H | -1.85509800 | 6.11595600  | 1.43697100  |
| H | -4.66769300 | 4.82343500  | -1.53778100 |
| H | -3.89174300 | 6.55094400  | 0.07585100  |
| C | -1.86525500 | 0.80812900  | -1.23263700 |
| C | -1.34402600 | 0.40644900  | -2.46092100 |
| C | -3.00960900 | 0.16166200  | -0.72359300 |
| C | -1.92254200 | -0.62819900 | -3.19114000 |
| H | -0.45546900 | 0.92128900  | -2.82638700 |
| C | -3.57214800 | -0.88228500 | -1.46111200 |
| C | -3.03863600 | -1.28389200 | -2.68169300 |
| H | -1.50671200 | -0.91932100 | -4.15535000 |
| H | -4.43988800 | -1.40064400 | -1.05278100 |
| H | -3.49897000 | -2.09988700 | -3.23556500 |
| H | 0.84724800  | 2.98988100  | -0.57986000 |
| H | -0.34624900 | 1.89748700  | 1.71672200  |
| C | 4.24164600  | -0.91975400 | 0.05732000  |
| H | 4.07034500  | -1.73118400 | 0.78077300  |
| H | 5.32755200  | -0.75115500 | 0.01642800  |
| C | 3.68762600  | -1.30823400 | -1.30887400 |

|   |             |             |             |
|---|-------------|-------------|-------------|
| H | 4.13179100  | -2.24752900 | -1.66977700 |
| H | 3.92321500  | -0.53313700 | -2.05342300 |
| C | 1.41783500  | -1.87495500 | -3.03415800 |
| C | 1.56309300  | -3.18501400 | -0.66163600 |
| C | 0.68501400  | -3.21333400 | -2.94493900 |
| H | 2.35050200  | -1.97564300 | -3.60708100 |
| H | 0.81372100  | -1.08616600 | -3.49189600 |
| C | 1.42918900  | -4.05378100 | -1.91109400 |
| H | 0.63912200  | -3.18912800 | -0.06778600 |
| H | 2.37706900  | -3.48911900 | 0.00791000  |
| H | -0.34783400 | -3.03778400 | -2.60212900 |
| H | 0.62148000  | -3.70789400 | -3.92191100 |
| H | 0.91698300  | -4.99984100 | -1.69770000 |
| H | 2.42635400  | -4.30869000 | -2.30249500 |
| P | 1.83206600  | -1.44343700 | -1.26702400 |
| C | 4.26941600  | 0.75778100  | 2.40088800  |
| C | 4.35283500  | 1.96568900  | -0.02288600 |
| C | 5.05036100  | 2.07131900  | 2.31526800  |
| H | 4.95161100  | -0.09461600 | 2.52303100  |
| H | 3.56131400  | 0.73597900  | 3.23431400  |
| C | 5.55820100  | 2.20362400  | 0.88277000  |
| H | 3.70570900  | 2.85156400  | -0.05932000 |
| H | 4.61168400  | 1.71446400  | -1.05870200 |
| H | 4.37975800  | 2.91445200  | 2.53682100  |
| H | 5.86229600  | 2.10868000  | 3.05151800  |
| H | 6.02793500  | 3.17765600  | 0.69819900  |
| H | 6.32659000  | 1.43821300  | 0.69532400  |
| P | 3.37738000  | 0.57963000  | 0.75917000  |
| C | -3.62329700 | 0.55493300  | 0.58729100  |
| H | -4.18585000 | 1.49425000  | 0.50442300  |
| H | -4.30771700 | -0.22252100 | 0.94428200  |
| H | -2.85553700 | 0.70637000  | 1.35617100  |

#### 4v-Ar-pro

|    |             |             |             |
|----|-------------|-------------|-------------|
| Cu | 0.00343200  | 1.03111600  | 1.12551700  |
| C  | -0.54121700 | -2.08493700 | 0.11979200  |
| H  | -0.39390300 | -3.16306100 | 0.23506500  |
| C  | 0.21381700  | -1.43605000 | -0.78362900 |
| H  | 0.05857500  | -0.35984600 | -0.91131100 |
| C  | 1.26430300  | -2.00171300 | -1.62493900 |
| C  | 1.94947400  | -1.15088600 | -2.50568500 |
| C  | 1.66073200  | -3.34794200 | -1.58407800 |
| C  | 3.00284700  | -1.60992000 | -3.28783800 |
| H  | 1.62799900  | -0.11024300 | -2.57600800 |

|   |             |             |             |
|---|-------------|-------------|-------------|
| C | 2.70882900  | -3.80909900 | -2.36713100 |
| H | 1.14593200  | -4.04196800 | -0.92140100 |
| C | 3.39380400  | -2.94301700 | -3.21837400 |
| H | 3.51598600  | -0.92471300 | -3.95976600 |
| H | 2.99780500  | -4.85682100 | -2.31261400 |
| H | 4.21754000  | -3.30817400 | -3.82716400 |
| C | -1.57518100 | -1.51472900 | 1.00056900  |
| C | -1.51860100 | -0.08665500 | 1.53373300  |
| C | -2.59616400 | -0.46661000 | 0.54890200  |
| C | -3.99814900 | -0.59122000 | 1.08373500  |
| C | -4.76057600 | 0.57493300  | 1.22370800  |
| C | -4.57960500 | -1.80271700 | 1.46370300  |
| C | -6.05072900 | 0.53437100  | 1.73427100  |
| H | -4.32134100 | 1.52670500  | 0.92557200  |
| C | -5.87359700 | -1.84788600 | 1.97784800  |
| H | -4.01606600 | -2.72726500 | 1.34790600  |
| C | -6.61465700 | -0.68089400 | 2.11659500  |
| H | -6.62030800 | 1.45601600  | 1.83721900  |
| H | -6.30425500 | -2.80513400 | 2.26542200  |
| H | -7.62536600 | -0.71591200 | 2.51724200  |
| C | -2.55030000 | 0.06958400  | -0.85677600 |
| C | -2.19888300 | 1.40363600  | -1.07980300 |
| C | -2.88440200 | -0.73391600 | -1.96445200 |
| C | -2.12728400 | 1.93931600  | -2.36232600 |
| H | -1.96186200 | 2.02247700  | -0.21282000 |
| C | -2.78539100 | -0.19112600 | -3.24780000 |
| C | -2.40355100 | 1.12860000  | -3.45754900 |
| H | -1.86150600 | 2.98710700  | -2.50442500 |
| H | -3.02020200 | -0.82628300 | -4.10166200 |
| H | -2.33962000 | 1.52384300  | -4.46922300 |
| H | -1.91634800 | -0.04004900 | 2.55285200  |
| H | -1.99018800 | -2.26017000 | 1.68035900  |
| C | 3.54765100  | 0.63198000  | 0.49490500  |
| H | 3.19579400  | 0.26952100  | -0.48493300 |
| H | 4.63097400  | 0.44688700  | 0.52553800  |
| C | 3.25342300  | 2.11983200  | 0.65976200  |
| H | 3.87521000  | 2.73714900  | -0.00615700 |
| H | 3.46327400  | 2.44890600  | 1.68887300  |
| C | 1.31036800  | 4.31611800  | 0.62093900  |
| C | 1.44765400  | 2.67284700  | -1.53945600 |
| C | 0.80497100  | 4.88618300  | -0.70477700 |
| H | 2.30167900  | 4.72238700  | 0.86624900  |
| H | 0.64172400  | 4.51845100  | 1.46236500  |
| C | 1.57495700  | 4.17236400  | -1.81142200 |

|   |             |             |             |
|---|-------------|-------------|-------------|
| H | 0.48966100  | 2.28327500  | -1.90958000 |
| H | 2.24810500  | 2.07379000  | -1.99166100 |
| H | -0.26931700 | 4.66995000  | -0.81087000 |
| H | 0.91953700  | 5.97563300  | -0.74819200 |
| H | 1.20495400  | 4.43374400  | -2.81019400 |
| H | 2.63233300  | 4.47520900  | -1.76952000 |
| P | 1.47106500  | 2.48603100  | 0.31520500  |
| C | 3.25819900  | -2.10831500 | 1.26727300  |
| C | 3.99525300  | -0.30544800 | 3.14093200  |
| C | 4.23416200  | -2.59634700 | 2.33890300  |
| H | 3.74927300  | -2.02733700 | 0.28668900  |
| H | 2.39919500  | -2.77443100 | 1.13667600  |
| C | 5.02500700  | -1.38489200 | 2.81826300  |
| H | 3.51403400  | -0.50954200 | 4.10587800  |
| H | 4.41852800  | 0.70550700  | 3.20010300  |
| H | 3.67300500  | -3.01426500 | 3.18783600  |
| H | 4.88306500  | -3.39668100 | 1.96218300  |
| H | 5.66318900  | -1.61889100 | 3.68025300  |
| H | 5.69214800  | -1.04165200 | 2.01298600  |
| P | 2.67755300  | -0.39903500 | 1.80046200  |
| C | -3.33500600 | -2.15201400 | -1.79564100 |
| H | -4.24850800 | -2.21099400 | -1.19045700 |
| H | -3.53815600 | -2.61725300 | -2.76587600 |
| H | -2.57430100 | -2.75376000 | -1.28137200 |

#### 4v-Ph-ini

|    |             |             |             |
|----|-------------|-------------|-------------|
| Cu | -0.16112900 | -0.19906600 | -0.13362900 |
| C  | -1.53362900 | 0.82972300  | 0.79367800  |
| H  | -1.70594200 | 0.66527800  | 1.87124100  |
| C  | -2.36094000 | 1.71446300  | 0.20573400  |
| H  | -2.23840100 | 1.91080400  | -0.86943300 |
| C  | -3.48243400 | 2.45803300  | 0.80009800  |
| C  | -4.36250400 | 3.15474700  | -0.03878000 |
| C  | -3.72850900 | 2.50220800  | 2.18002800  |
| C  | -5.44765500 | 3.85781400  | 0.47081100  |
| H  | -4.18246400 | 3.13616600  | -1.11459800 |
| C  | -4.80990300 | 3.20390200  | 2.69259900  |
| H  | -3.05121700 | 1.98243600  | 2.85626000  |
| C  | -5.67890100 | 3.88569800  | 1.84211700  |
| H  | -6.11509500 | 4.38798800  | -0.20609400 |
| H  | -4.97629200 | 3.22530500  | 3.76821800  |
| H  | -6.52487600 | 4.43665500  | 2.24706000  |
| C  | 1.01311100  | 1.07814600  | -1.11381700 |
| C  | 1.45329700  | -0.18522400 | -1.37544300 |

|   |             |             |             |
|---|-------------|-------------|-------------|
| C | 2.38435600  | 0.71163500  | -0.60002200 |
| C | 2.64358200  | 0.42442600  | 0.85563400  |
| C | 1.85507100  | 0.95612400  | 1.87883300  |
| C | 3.71330300  | -0.40849300 | 1.20047900  |
| C | 2.11786700  | 0.64646900  | 3.21154100  |
| H | 1.02499800  | 1.61227100  | 1.62016400  |
| C | 3.98216200  | -0.71398400 | 2.53022300  |
| H | 4.34543000  | -0.80983300 | 0.40767000  |
| C | 3.18228900  | -0.18725700 | 3.54279400  |
| H | 1.49454700  | 1.07415800  | 3.99486500  |
| H | 4.82114800  | -1.36111600 | 2.77871300  |
| H | 3.39311000  | -0.42020100 | 4.58447900  |
| C | 3.56621700  | 1.29205500  | -1.33197400 |
| C | 4.23155400  | 0.53331700  | -2.29549900 |
| C | 4.01649300  | 2.59591000  | -1.05248100 |
| C | 5.33132700  | 1.03530800  | -2.98281300 |
| H | 3.87669600  | -0.47537900 | -2.50698900 |
| C | 5.11681000  | 3.08904900  | -1.75438300 |
| C | 5.77582400  | 2.32285700  | -2.70975000 |
| H | 5.83568100  | 0.42333100  | -3.72738500 |
| H | 5.45974000  | 4.10190200  | -1.54414000 |
| H | 6.63137000  | 2.73413500  | -3.24098600 |
| C | -1.68140100 | -3.12406000 | 0.42005100  |
| H | -2.49611600 | -2.57071400 | 0.91191100  |
| H | -1.67563800 | -4.13688000 | 0.84945700  |
| C | -1.89844000 | -3.16333500 | -1.08790400 |
| H | -2.82391100 | -3.70679900 | -1.32882700 |
| H | -1.07747400 | -3.71124600 | -1.57599100 |
| C | -2.32789900 | -1.97878100 | -3.64853800 |
| C | -3.71375800 | -0.98983200 | -1.54417800 |
| C | -3.73115400 | -1.44488600 | -3.94295900 |
| H | -2.30830900 | -3.07566600 | -3.71270700 |
| H | -1.57665400 | -1.59473000 | -4.34559900 |
| C | -4.54695300 | -1.60326600 | -2.66501900 |
| H | -3.77879400 | 0.10629400  | -1.54938400 |
| H | -4.01205600 | -1.30702300 | -0.53749500 |
| H | -3.67263400 | -0.37695400 | -4.19991900 |
| H | -4.18894500 | -1.95404300 | -4.80022200 |
| H | -5.53635000 | -1.13559400 | -2.74372300 |
| H | -4.71602200 | -2.67368000 | -2.47135600 |
| P | -1.93372500 | -1.46067200 | -1.87707700 |
| C | -0.13358500 | -2.31522000 | 2.74069400  |
| C | 1.19161200  | -3.52375400 | 0.70465800  |
| C | 1.05228700  | -3.20707200 | 3.12230900  |

|   |             |             |             |
|---|-------------|-------------|-------------|
| H | -1.08861500 | -2.74948200 | 3.06611800  |
| H | -0.05563600 | -1.30852900 | 3.16613600  |
| C | 1.20554200  | -4.26962400 | 2.03717200  |
| H | 2.14330800  | -2.99881600 | 0.54046100  |
| H | 1.00612800  | -4.16172100 | -0.16799000 |
| H | 1.96417300  | -2.59223300 | 3.15359100  |
| H | 0.92262500  | -3.64598700 | 4.11872500  |
| H | 2.11970400  | -4.86187800 | 2.16707300  |
| H | 0.35982300  | -4.97301800 | 2.08249200  |
| P | -0.12603900 | -2.22564200 | 0.87911900  |
| H | 0.57471300  | 1.94109300  | -1.60396000 |
| H | 1.53745400  | -0.87812100 | -2.20551600 |
| C | 3.33758100  | 3.45261800  | -0.02616800 |
| H | 2.25189500  | 3.49047500  | -0.17988200 |
| H | 3.49142100  | 3.06295200  | 0.98867200  |
| H | 3.72093800  | 4.47774600  | -0.05481000 |

#### 4v-Ph-ts

|    |             |             |             |
|----|-------------|-------------|-------------|
| Cu | -0.70792700 | -0.51399600 | -0.68644300 |
| C  | -0.12693800 | 1.06529400  | 0.41046300  |
| H  | 0.38718500  | 0.76552600  | 1.33255900  |
| C  | -0.46845200 | 2.36165800  | 0.28628500  |
| H  | -0.94182600 | 2.69418000  | -0.64669800 |
| C  | -0.27000800 | 3.43308400  | 1.26650800  |
| C  | -0.92145600 | 4.66065600  | 1.08269000  |
| C  | 0.55791500  | 3.29475500  | 2.39162600  |
| C  | -0.76996300 | 5.70282300  | 1.98839300  |
| H  | -1.56276500 | 4.78632200  | 0.20960300  |
| C  | 0.71090700  | 4.33482900  | 3.29660900  |
| H  | 1.09594500  | 2.35954500  | 2.54621000  |
| C  | 0.04653800  | 5.54507500  | 3.10381200  |
| H  | -1.29034500 | 6.64402000  | 1.82187400  |
| H  | 1.36201600  | 4.20514100  | 4.15907900  |
| H  | 0.17123500  | 6.35915200  | 3.81418900  |
| C  | 0.98725400  | 0.32728300  | -1.28471500 |
| C  | 0.94712800  | -0.97138900 | -1.84029500 |
| C  | 2.08701600  | -0.61826200 | -0.91863900 |
| C  | 2.17706300  | -1.29452300 | 0.42566000  |
| C  | 2.73704400  | -0.65301300 | 1.53448200  |
| C  | 1.74541500  | -2.61385400 | 0.57219300  |
| C  | 2.82952400  | -1.29878300 | 2.76347500  |
| H  | 3.10865000  | 0.36634500  | 1.43267700  |
| C  | 1.86285900  | -3.27471600 | 1.79168500  |
| H  | 1.31348800  | -3.10824100 | -0.29788400 |

|   |             |             |             |
|---|-------------|-------------|-------------|
| C | 2.39346100  | -2.61486100 | 2.89716600  |
| H | 3.25720700  | -0.77722000 | 3.61743300  |
| H | 1.54343700  | -4.31318000 | 1.87837600  |
| H | 2.47756100  | -3.12677100 | 3.85387400  |
| C | 3.44088800  | -0.33680400 | -1.52111400 |
| C | 4.08932100  | -1.40327000 | -2.15300600 |
| C | 4.07902800  | 0.91385900  | -1.45906200 |
| C | 5.34126200  | -1.25534700 | -2.73168300 |
| H | 3.58169700  | -2.36800600 | -2.18231700 |
| C | 5.34167100  | 1.04630000  | -2.04822500 |
| C | 5.97212100  | -0.01588400 | -2.68038400 |
| H | 5.82314400  | -2.10068400 | -3.21818100 |
| H | 5.83853000  | 2.01569700  | -1.99957700 |
| H | 6.95515300  | 0.12127700  | -3.12587500 |
| C | -3.46251700 | -1.21476700 | 0.80076000  |
| H | -3.44811700 | -0.20397100 | 1.23703000  |
| H | -4.13197300 | -1.82686800 | 1.42156400  |
| C | -3.93705200 | -1.16232500 | -0.64752400 |
| H | -4.97419500 | -0.80455100 | -0.72028300 |
| H | -3.91480700 | -2.16855200 | -1.09326600 |
| C | -3.54112200 | -0.37121400 | -3.39478500 |
| C | -3.63648100 | 1.56681200  | -1.50665000 |
| C | -4.16619700 | 0.96294600  | -3.81064900 |
| H | -4.30682800 | -1.15558500 | -3.32272200 |
| H | -2.77614000 | -0.72000300 | -4.09444700 |
| C | -4.74583300 | 1.60422000  | -2.55349800 |
| H | -2.88737500 | 2.34359600  | -1.70746300 |
| H | -3.97763300 | 1.71314300  | -0.47437600 |
| H | -3.38787800 | 1.62225100  | -4.22174700 |
| H | -4.91854100 | 0.83014200  | -4.59744800 |
| H | -5.10467300 | 2.62454300  | -2.73725700 |
| H | -5.61203200 | 1.01897200  | -2.20913900 |
| P | -2.80939200 | -0.09739300 | -1.68847000 |
| C | -1.33312900 | -1.69819000 | 2.71189700  |
| C | -1.97730400 | -3.67275200 | 0.97465100  |
| C | -1.38240600 | -3.12145700 | 3.28468700  |
| H | -2.08558300 | -1.04260100 | 3.16916000  |
| H | -0.35244900 | -1.23152100 | 2.85977500  |
| C | -2.33292100 | -3.95846200 | 2.43189300  |
| H | -1.03811900 | -4.16742000 | 0.69441400  |
| H | -2.74344000 | -3.98784900 | 0.25610200  |
| H | -0.37493900 | -3.55695000 | 3.22669500  |
| H | -1.67142800 | -3.12105200 | 4.34237100  |
| H | -2.26130700 | -5.02713300 | 2.67061100  |



|   |             |             |             |
|---|-------------|-------------|-------------|
| H | -3.37386400 | -3.66065000 | 2.62804300  |
| P | -1.70676600 | -1.83368600 | 0.88783300  |
| H | 1.06668600  | 1.31389900  | -1.72781200 |
| H | 1.00898900  | -1.21140300 | -2.89758400 |
| C | 3.47178000  | 2.12653500  | -0.80681700 |
| H | 2.96882500  | 2.76824900  | -1.54431600 |
| H | 2.72154900  | 1.88322400  | -0.04838400 |
| H | 4.24870400  | 2.73952000  | -0.33577300 |

**4v-Ph-pro**

|    |             |             |             |
|----|-------------|-------------|-------------|
| Cu | 0.24788800  | 0.03632600  | -1.41181800 |
| C  | -0.34959600 | -1.26492400 | 1.16728500  |
| H  | -0.08492400 | -0.20423100 | 1.15634000  |
| C  | 0.43191300  | -2.10706500 | 1.86487000  |
| H  | 0.20832100  | -3.17726100 | 1.85209400  |
| C  | 1.66261300  | -1.70950600 | 2.54512000  |
| C  | 2.60996000  | -2.68453100 | 2.88824400  |
| C  | 1.98177900  | -0.36840700 | 2.82085900  |
| C  | 3.83602200  | -2.33911900 | 3.44450900  |
| H  | 2.37872800  | -3.73109200 | 2.68960600  |
| C  | 3.20864200  | -0.02247600 | 3.37113800  |
| H  | 1.24923700  | 0.41288900  | 2.61459500  |
| C  | 4.14918800  | -1.00412200 | 3.68043800  |
| H  | 4.55363200  | -3.11885300 | 3.69195800  |
| H  | 3.42869800  | 1.02496100  | 3.57409600  |
| H  | 5.10819800  | -0.73067200 | 4.11394000  |
| C  | -1.46344100 | -1.60960800 | 0.28889400  |
| C  | -1.40551100 | -0.96758400 | -1.11580900 |
| C  | -2.48868200 | -0.58417100 | -0.14452200 |
| C  | -2.49094900 | 0.80879700  | 0.42693400  |
| C  | -2.40294600 | 1.07953500  | 1.79519500  |
| C  | -2.63667000 | 1.89101300  | -0.44885800 |
| C  | -2.47444600 | 2.38718500  | 2.27547500  |
| H  | -2.26482900 | 0.25565700  | 2.49395200  |
| C  | -2.71828100 | 3.19470100  | 0.02391400  |
| H  | -2.68117900 | 1.68772900  | -1.51865300 |
| C  | -2.64077400 | 3.44913900  | 1.39320100  |
| H  | -2.40555800 | 2.57253900  | 3.34578300  |
| H  | -2.84413200 | 4.01903400  | -0.67692200 |
| H  | -2.70592600 | 4.46933300  | 1.76684200  |
| C  | -3.88290100 | -1.09997200 | -0.40764500 |
| C  | -4.38184400 | -1.01960000 | -1.71111400 |
| C  | -4.71055400 | -1.62722300 | 0.60236900  |
| C  | -5.66273600 | -1.44897400 | -2.03414000 |

|   |             |             |             |
|---|-------------|-------------|-------------|
| H | -3.73264700 | -0.61428000 | -2.48641600 |
| C | -5.99049200 | -2.07104200 | 0.25965700  |
| C | -6.47307700 | -1.98422500 | -1.04005500 |
| H | -6.02170100 | -1.37328000 | -3.05847800 |
| H | -6.62185900 | -2.49324400 | 1.04173400  |
| H | -7.47538400 | -2.33698900 | -1.27402500 |
| C | 3.06430700  | 1.55244900  | -0.48796000 |
| H | 3.16665300  | 0.97297400  | 0.44397700  |
| H | 3.66882800  | 2.46231400  | -0.36427500 |
| C | 3.53835700  | 0.72480800  | -1.67740600 |
| H | 4.56809500  | 0.36927100  | -1.52856500 |
| H | 3.53722000  | 1.33067000  | -2.59620600 |
| C | 3.24331800  | -1.58885400 | -3.40300100 |
| C | 3.00003500  | -1.94032400 | -0.72112500 |
| C | 3.70669700  | -2.93548100 | -2.83994200 |
| H | 4.10103500  | -0.97932500 | -3.71911000 |
| H | 2.57452300  | -1.69430600 | -4.26187000 |
| C | 4.13900400  | -2.69913200 | -1.39666500 |
| H | 2.16339300  | -2.60709500 | -0.47248400 |
| H | 3.28613300  | -1.43777200 | 0.21276200  |
| H | 2.86737700  | -3.64565100 | -2.85154400 |
| H | 4.50516100  | -3.37378700 | -3.45083900 |
| H | 4.37013100  | -3.63519700 | -0.87363800 |
| H | 5.05696000  | -2.09188100 | -1.38352600 |
| P | 2.38703200  | -0.71274400 | -1.98393300 |
| C | 0.99121300  | 2.90711100  | 0.98764200  |
| C | 1.29832300  | 3.54451200  | -1.62880500 |
| C | 0.81090600  | 4.38285100  | 0.61307100  |
| H | 1.87945000  | 2.75322300  | 1.61683300  |
| H | 0.12080300  | 2.51266100  | 1.52545000  |
| C | 1.63246500  | 4.66024700  | -0.64159300 |
| H | 0.29955400  | 3.69249200  | -2.06047400 |
| H | 2.00797000  | 3.45133200  | -2.45965500 |
| H | -0.25161500 | 4.56188600  | 0.39496000  |
| H | 1.08417500  | 5.04482100  | 1.44350600  |
| H | 1.42225400  | 5.65272600  | -1.05953000 |
| H | 2.70564700  | 4.63858500  | -0.39924300 |
| P | 1.24992700  | 1.98058100  | -0.61784500 |
| H | -1.82923300 | -2.63750800 | 0.36824100  |
| H | -1.76330700 | -1.67919000 | -1.86611300 |
| C | -4.27732700 | -1.70991700 | 2.03657300  |
| H | -3.24119300 | -2.05241700 | 2.14119800  |
| H | -4.33531400 | -0.72683000 | 2.52263700  |
| H | -4.92357700 | -2.39180100 | 2.59997900  |

**Table S6.** The coordinates of [4t-Ar-ts]' and [4t-Ph-ts]', which have the bromophenyl group being rotated by 180° from 4t-Ar-ts and 4t-Ph-ts, respectively.

|    | [4t-Ar-ts]' |             |             |
|----|-------------|-------------|-------------|
| Cu | -0.60384900 | 0.66959300  | -0.67515200 |
| C  | -1.16386200 | -1.27792600 | -0.80326200 |
| H  | -1.66272500 | -1.59713000 | -1.72875500 |
| C  | -1.32614400 | -2.05319700 | 0.28699500  |
| H  | -0.82218100 | -1.76134100 | 1.21133900  |
| C  | -2.13220100 | -3.26862100 | 0.42078800  |
| C  | -2.32563100 | -3.80788100 | 1.70098200  |
| C  | -2.72882000 | -3.92821000 | -0.66408500 |
| C  | -3.09024200 | -4.95097700 | 1.89576200  |
| H  | -1.86110500 | -3.30766900 | 2.55274300  |
| C  | -3.49168900 | -5.07058600 | -0.47156000 |
| H  | -2.57977100 | -3.54174700 | -1.67128200 |
| C  | -3.68004600 | -5.58868000 | 0.80884600  |
| H  | -3.22493200 | -5.34761800 | 2.90013300  |
| H  | -3.94079100 | -5.56803700 | -1.32906100 |
| H  | -4.27758900 | -6.48549200 | 0.95537400  |
| C  | 0.64227300  | -0.61034100 | -1.62719800 |
| C  | 1.20662900  | 0.68927200  | -1.59288000 |
| C  | 1.98717800  | -0.42281900 | -0.96017600 |
| C  | 3.15840500  | -0.98128200 | -1.71943000 |
| C  | 3.16870000  | -0.95863000 | -3.12056500 |
| C  | 4.27561300  | -1.51657900 | -1.06844300 |
| C  | 4.24248900  | -1.46631700 | -3.84031200 |
| H  | 2.32492200  | -0.52741700 | -3.65576600 |
| C  | 5.35501700  | -2.01690100 | -1.78849500 |
| H  | 4.30564200  | -1.53981300 | 0.01898400  |
| C  | 5.34408900  | -1.99977500 | -3.17838100 |
| H  | 4.22017400  | -1.43904500 | -4.92801600 |
| H  | 6.21163800  | -2.42320800 | -1.25446500 |
| H  | 6.18756100  | -2.39323900 | -3.74115000 |
| C  | 2.10177300  | -0.52355700 | 0.53048600  |
| C  | 1.74141300  | -1.71731100 | 1.16490200  |
| C  | 2.62093600  | 0.49007200  | 1.33882400  |
| C  | 1.83297500  | -1.87827700 | 2.54234900  |
| H  | 1.37415600  | -2.52943400 | 0.54000600  |
| C  | 2.73093700  | 0.34614500  | 2.71934000  |
| C  | 2.32375900  | -0.83749900 | 3.32570100  |
| H  | 1.52925500  | -2.81789800 | 2.99973100  |
| H  | 3.14464100  | 1.16141600  | 3.30927700  |

|    |             |             |             |
|----|-------------|-------------|-------------|
| H  | 2.40759200  | -0.94603500 | 4.40505100  |
| Br | 3.26808200  | 2.10760600  | 0.58276700  |
| H  | 1.53945600  | 1.29544700  | -2.43047000 |
| H  | 0.45376300  | -1.29117500 | -2.45666500 |
| C  | -3.47189500 | 1.82260400  | 0.12132100  |
| H  | -3.73852000 | 0.79364700  | 0.40850900  |
| H  | -4.41039300 | 2.37637300  | -0.02653100 |
| C  | -2.60162400 | 2.46761400  | 1.19368600  |
| H  | -3.14670800 | 2.57988500  | 2.14138000  |
| H  | -2.30071100 | 3.47881200  | 0.87961500  |
| C  | -0.07702300 | 2.67516500  | 2.56840500  |
| C  | -1.50563800 | 0.40309300  | 2.88080300  |
| C  | -0.12621100 | 2.08475700  | 3.98363900  |
| H  | -0.57063500 | 3.65489900  | 2.52625700  |
| H  | 0.94598800  | 2.80727400  | 2.19768400  |
| C  | -1.41764000 | 1.28322000  | 4.12341800  |
| H  | -0.76679200 | -0.41023000 | 2.93665700  |
| H  | -2.48802700 | -0.05409800 | 2.70597100  |
| H  | 0.72437300  | 1.40111000  | 4.11689000  |
| H  | -0.03644000 | 2.86504400  | 4.74898600  |
| H  | -1.43341200 | 0.69159900  | 5.04748300  |
| H  | -2.28052100 | 1.96481900  | 4.16907400  |
| P  | -1.02204700 | 1.50142400  | 1.45572000  |
| C  | -3.76323300 | 0.80373700  | -2.57322100 |
| C  | -2.87536000 | 3.34552800  | -2.25385400 |
| C  | -4.17915000 | 1.81566400  | -3.64402500 |
| H  | -4.62159000 | 0.50422700  | -1.95698300 |
| H  | -3.32837100 | -0.10823700 | -2.99376100 |
| C  | -4.20681500 | 3.19156900  | -2.98516300 |
| H  | -2.06525300 | 3.57177100  | -2.95790600 |
| H  | -2.87339500 | 4.13428300  | -1.49186500 |
| H  | -3.43480400 | 1.82199400  | -4.45355700 |
| H  | -5.14139700 | 1.55195400  | -4.09889100 |
| H  | -4.37295900 | 3.99540300  | -3.71308700 |
| H  | -5.03783900 | 3.23602200  | -2.26501900 |
| P  | -2.52710600 | 1.68257800  | -1.47749000 |

**[4t-Ph-ts]'**

|    |             |             |             |
|----|-------------|-------------|-------------|
| Cu | -0.72495800 | -0.74245500 | -0.46140300 |
| C  | -1.00500800 | 1.19480800  | -0.02370700 |
| H  | -0.61133300 | 1.44122500  | 0.96903300  |
| C  | -1.78784100 | 2.11139400  | -0.62273800 |
| H  | -2.15892900 | 1.91192500  | -1.63651900 |

|    |             |             |             |
|----|-------------|-------------|-------------|
| C  | -2.21286300 | 3.40406100  | -0.07520400 |
| C  | -3.14917100 | 4.17460500  | -0.77845200 |
| C  | -1.71922100 | 3.92107900  | 1.13332700  |
| C  | -3.58343500 | 5.40379000  | -0.29760600 |
| H  | -3.53959800 | 3.79078500  | -1.72140000 |
| C  | -2.15141700 | 5.14789400  | 1.61435200  |
| H  | -0.97847500 | 3.35288600  | 1.69623200  |
| C  | -3.08762500 | 5.89806300  | 0.90420700  |
| H  | -4.31156300 | 5.97952900  | -0.86574200 |
| H  | -1.75061100 | 5.52835100  | 2.55205600  |
| H  | -3.42266400 | 6.86058100  | 1.28392300  |
| C  | 0.64909100  | 0.47488500  | -1.21788400 |
| C  | 1.18969100  | -0.83036600 | -1.23183000 |
| C  | 1.90757600  | 0.22088800  | -0.43883400 |
| C  | 1.91634900  | 0.18024300  | 1.06747000  |
| C  | 1.92007400  | 1.36246500  | 1.81267000  |
| C  | 1.93134500  | -1.03795300 | 1.74653600  |
| C  | 1.91587800  | 1.33041100  | 3.20379200  |
| H  | 1.91362800  | 2.31981300  | 1.28971500  |
| C  | 1.95405300  | -1.07528300 | 3.13797800  |
| H  | 1.92536800  | -1.95405500 | 1.15766100  |
| C  | 1.93775000  | 0.10828100  | 3.87198900  |
| H  | 1.90631800  | 2.26112900  | 3.76761700  |
| H  | 1.99154100  | -2.03447200 | 3.65394400  |
| H  | 1.94894500  | 0.07837700  | 4.95992100  |
| C  | 3.12897400  | 0.88714700  | -1.01447400 |
| C  | 3.07774400  | 2.23494900  | -1.39008400 |
| C  | 4.35186900  | 0.23234400  | -1.18370100 |
| C  | 4.18333500  | 2.89607400  | -1.90987700 |
| H  | 2.13604400  | 2.76900300  | -1.26305500 |
| C  | 5.46928100  | 0.87628000  | -1.70366300 |
| C  | 5.38470000  | 2.21430600  | -2.06838400 |
| H  | 4.10578600  | 3.94399800  | -2.18984500 |
| H  | 6.39767900  | 0.32353300  | -1.82061800 |
| H  | 6.25796400  | 2.71810100  | -2.47570200 |
| Br | 4.54241700  | -1.59889400 | -0.71322300 |
| C  | -3.34090900 | -1.87641100 | 0.98744700  |
| H  | -3.76293700 | -0.86168300 | 0.92065400  |
| H  | -3.90071200 | -2.41054000 | 1.76804800  |
| C  | -3.44459400 | -2.58455200 | -0.35902200 |
| H  | -4.49181800 | -2.73870100 | -0.65649600 |
| H  | -2.97807200 | -3.58006000 | -0.30468900 |
| C  | -2.66142600 | -2.82344900 | -3.12987500 |
| C  | -3.88138100 | -0.53920800 | -2.33970700 |

|   |             |             |             |
|---|-------------|-------------|-------------|
| C | -3.57290400 | -2.14221100 | -4.15386700 |
| H | -3.10881300 | -3.76035100 | -2.77119000 |
| H | -1.67220300 | -3.06243600 | -3.53080100 |
| C | -4.63376900 | -1.37021000 | -3.37501800 |
| H | -3.41073500 | 0.33362600  | -2.81064700 |
| H | -4.50231600 | -0.16353100 | -1.51710100 |
| H | -2.98570400 | -1.43425300 | -4.75669900 |
| H | -4.01078800 | -2.86659400 | -4.85112300 |
| H | -5.25710800 | -0.74837800 | -4.02947700 |
| H | -5.30816500 | -2.07991300 | -2.87216500 |
| P | -2.52560200 | -1.63968200 | -1.68118400 |
| C | -1.69803200 | -0.66096300 | 3.04310900  |
| C | -1.23101200 | -3.24547000 | 2.38428000  |
| C | -1.43572400 | -1.62393800 | 4.20908500  |
| H | -2.70546300 | -0.22656100 | 3.08262100  |
| H | -0.98145500 | 0.16873800  | 3.02924400  |
| C | -1.82425400 | -3.03569900 | 3.77580200  |
| H | -0.14429600 | -3.39162900 | 2.43709700  |
| H | -1.65291600 | -4.09995200 | 1.84175400  |
| H | -0.36211600 | -1.60563300 | 4.44272000  |
| H | -1.96630000 | -1.31267400 | 5.11675200  |
| H | -1.47459400 | -3.79200600 | 4.48988600  |
| H | -2.91998300 | -3.12628100 | 3.73212600  |
| P | -1.55361600 | -1.65628600 | 1.47035900  |
| H | 0.47585700  | 1.21598200  | -1.99102000 |
| H | 1.55522900  | -1.38540600 | -2.08956900 |

---

## References

1. (a) Sherrill, W. M.; Kim, R.; Rubin, M. *Tetrahedron* **2008**, *64*, 8610 – 8617; (b). Phan, D. H. T.; Kou, K. G. M., Dong, V. M. *J. Am. Chem. Soc* **2010**, *132*, 16354–16355; (c). Zhang, H.; Wang, B.; Yi, H.; Wang; J. *Org. Lett.* **2015**, *17*, 3322 – 3325; (d). Müller, D. S., Marek, I., *J. Am. Chem. Soc* **2015**, *137*, 15414 – 15417; (e) Liu, S. Liebeskind, L. S. *Org. Lett.* **2007**, *9*, 1947 – 1950.
2. Liu, X. Y.; Yang, C. T.; Zhang, Z. Q.; Lu, X.; Luo, X.; Xiao, B.; Fu, Y. *Chem. Commun.* **2015**, *51*, 2388 - 2391
3. Zhao, H.; Chen, X. W.; Jiang, H. F.; Zhang, M. *Org. Chem. Front.* **2018**, *5*, 539–543.
4. Frisch, M. J.; Trucks, G. W.; Schlegel, H. B.; Scuseria, G. E.; Robb, M. A.; Cheeseman, J. R.; Scalmani, G.; Barone, V.; Petersson, G. A.; Nakatsuji, H.; Li, X.; Caricato, M.; Marenich, A. V.; Bloino, J.; Janesko, B. G.; Gomperts, R.; Mennucci, B.; Hratchian, H. P.; Ortiz, J. V.; Izmaylov, A. F.; Sonnenberg, J. L.; Williams; Ding, F.; Lipparini, F.; Egidi, F.; Goings, J.; Peng, B.; Petrone, A.; Henderson, T.; Ranasinghe, D.; Zakrzewski, V. G.; Gao, J.; Rega, N.; Zheng, G.; Liang, W.; Hada, M.; Ehara, M.; Toyota, K.; Fukuda, R.; Hasegawa, J.; Ishida, M.; Nakajima, T.; Honda, Y.; Kitao, O.; Nakai, H.; Vreven, T.; Throssell, K.; Montgomery Jr., J. A.; Peralta, J. E.; Ogliaro, F.; Bearpark, M. J.; Heyd, J. J.; Brothers, E. N.; Kudin, K. N.; Staroverov, V. N.; Keith, T. A.; Kobayashi, R.; Normand, J.; Raghavachari, K.; Rendell, A. P.; Burant, J. C.; Iyengar, S. S.; Tomasi, J.; Cossi, M.; Millam, J. M.; Klene, M.; Adamo, C.; Cammi, R.; Ochterski, J. W.; Martin, R. L.; Morokuma, K.; Farkas, O.; Foresman, J. B.; Fox, D. J. Gaussian 16 Rev. A.03, Wallingford, CT, 2016.
5. Zhao, Y.; Truhlar, D. G., The M06 suite of density functionals for main group thermochemistry, thermochemical kinetics, noncovalent interactions, excited states, and transition elements: two new functionals and systematic testing of four M06-class functionals and 12 other functionals. *Theor. Chem. Acc.* **2008**, *120*, 215-241.
6. Petersson, G. A.; Al-Laham, M. A., A complete basis set model chemistry. II. Open-shell systems and the total energies of the first-row atoms. *J. Chem. Phys.* 1991, *94* (9), 6081-6090.
7. Dolg, M.; Wedig, U.; Stoll, H.; Preuss, H., Energy-adjusted ab initio pseudopotentials for the first row transition elements. *J. Chem. Phys.* **1987**, *86*, 866-872.
8. Krishnan, R.; Binkley, J. S.; Seeger, R.; Pople, J. A., Self-consistent molecular orbital methods. XX. A basis set for correlated wave functions. *J. Chem. Phys.* **1980**, *72*, 650-654.
9. Marenich, A. V.; Cramer, C. J.; Truhlar, D. G., Universal Solvation Model Based on Solute Electron Density and on a Continuum Model of the Solvent Defined by the Bulk Dielectric Constant and Atomic Surface Tensions. *J. Phys. Chem. B* **2009**, *113*, 6378-6396.
10. Lu, T., molclus program, Version 1.9.3, <http://www.keinisci.com/research/molclus.html> (accessed Feb 26th, 2020)

## 6. Copies of NMR spectra and chromatograph of products.

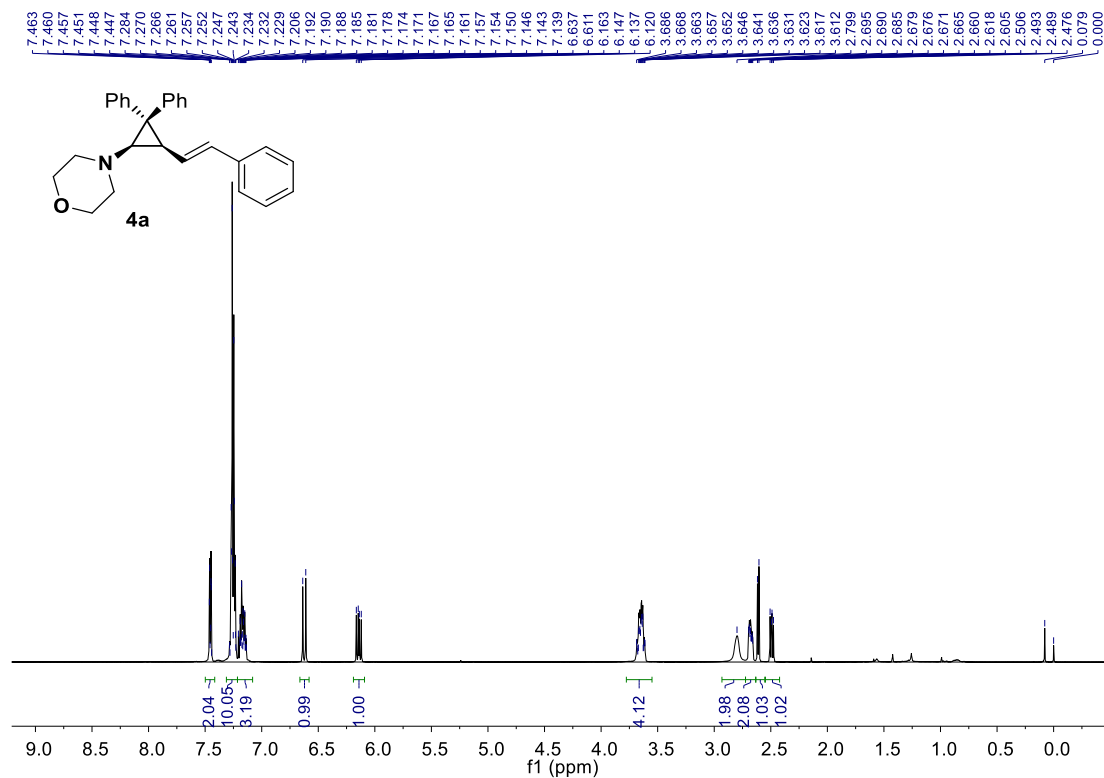

<sup>1</sup>H NMR (600 MHz, CDCl<sub>3</sub>) spectrum for compound 4a.

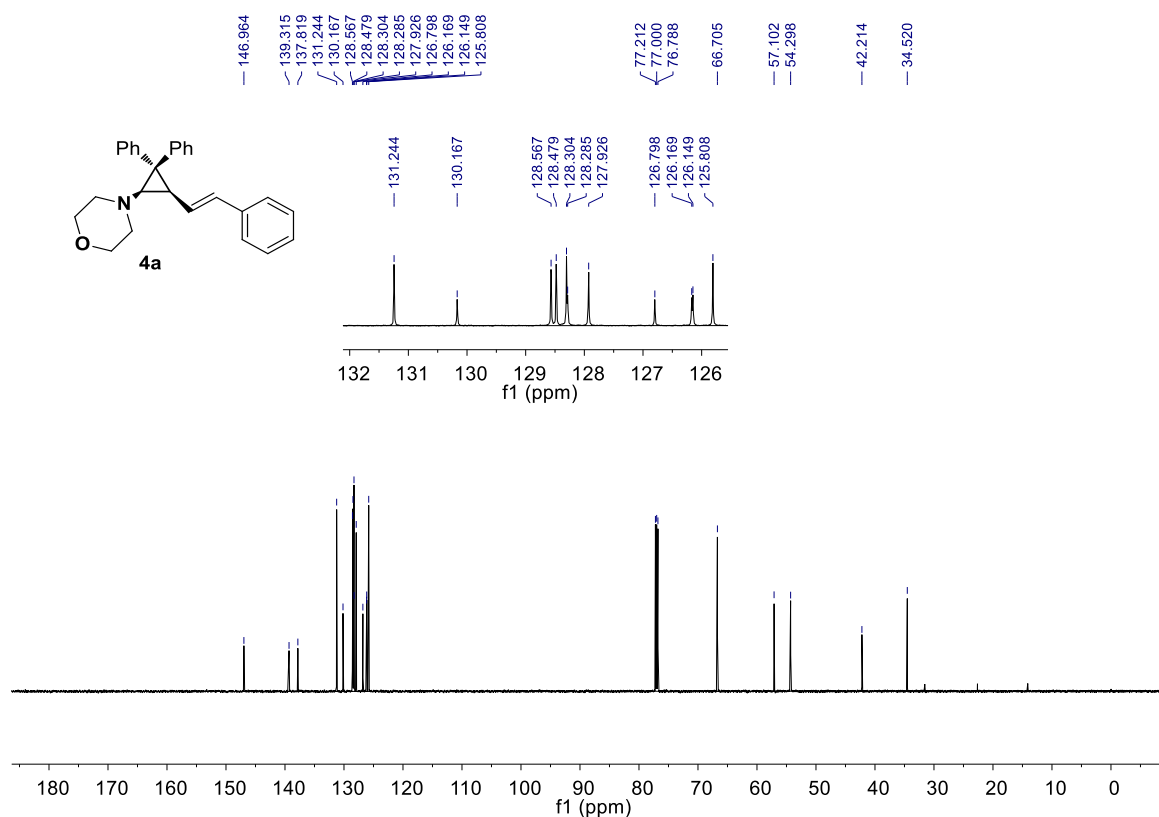

<sup>13</sup>C NMR (150 MHz, CDCl<sub>3</sub>) spectrum for compound 4a.



**HPLC conditions:** CHIRALCEL AD-H, 95/5 hexanes/*i*-PrOH, 0.4 mL/min, 250 nm,  $t_R$  (major) = 16.2 min,  $t_R$  (minor) = 14.3 min.

**Racemate:**

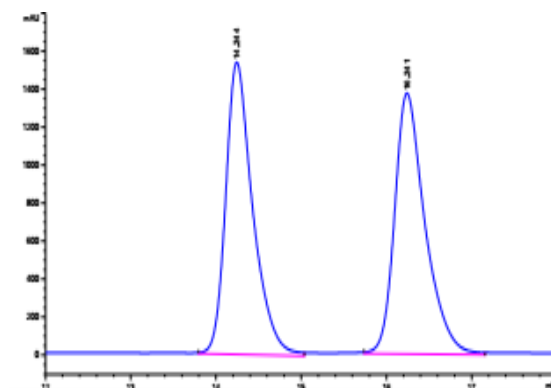

**Chiral sample:**

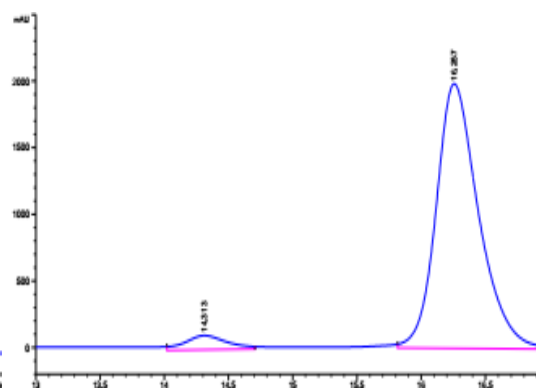

**Racemate:**

| Peak | PetTime | Type | Width(min) | Area(mAu*S) | Hight(mAu) | Area%   |
|------|---------|------|------------|-------------|------------|---------|
| 1    | 14.244  | MM R | 0.3681     | 3.39500e4   | 1537.14600 | 49.9214 |
| 2    | 16.241  | MM R | 0.4137     | 3.40568e4   | 1372.18555 | 50.0786 |

**Chiral sample:**

| Peak | PetTime | Type | Width(min) | Area(mAu*S) | Hight(mAu) | Area%   |
|------|---------|------|------------|-------------|------------|---------|
| 1    | 14.313  | MM R | 0.3817     | 2460.76392  | 107.44676  | 5.1214  |
| 2    | 16.257  | MM R | 0.3824     | 4.55884e4   | 1986.76709 | 94.8786 |

**HPLC chromatograph for compound 4a.**

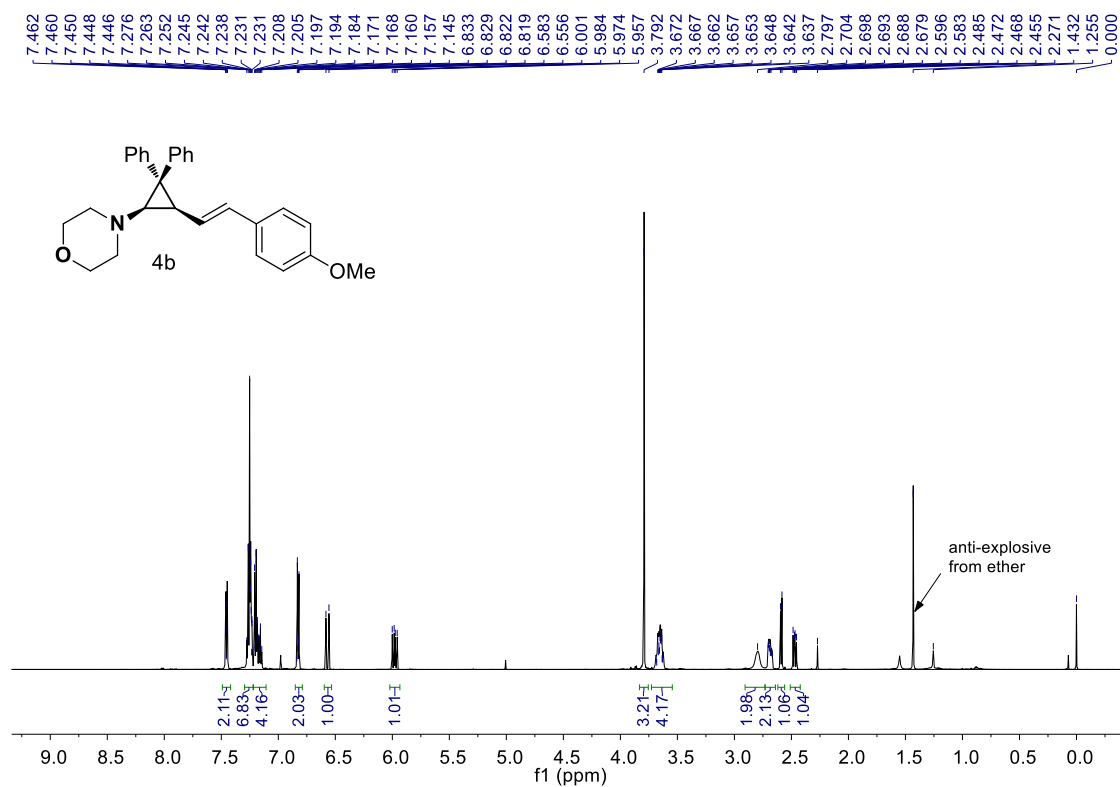

**<sup>1</sup>H NMR (600 MHz, CDCl<sub>3</sub>) spectrum for compound 4b.**

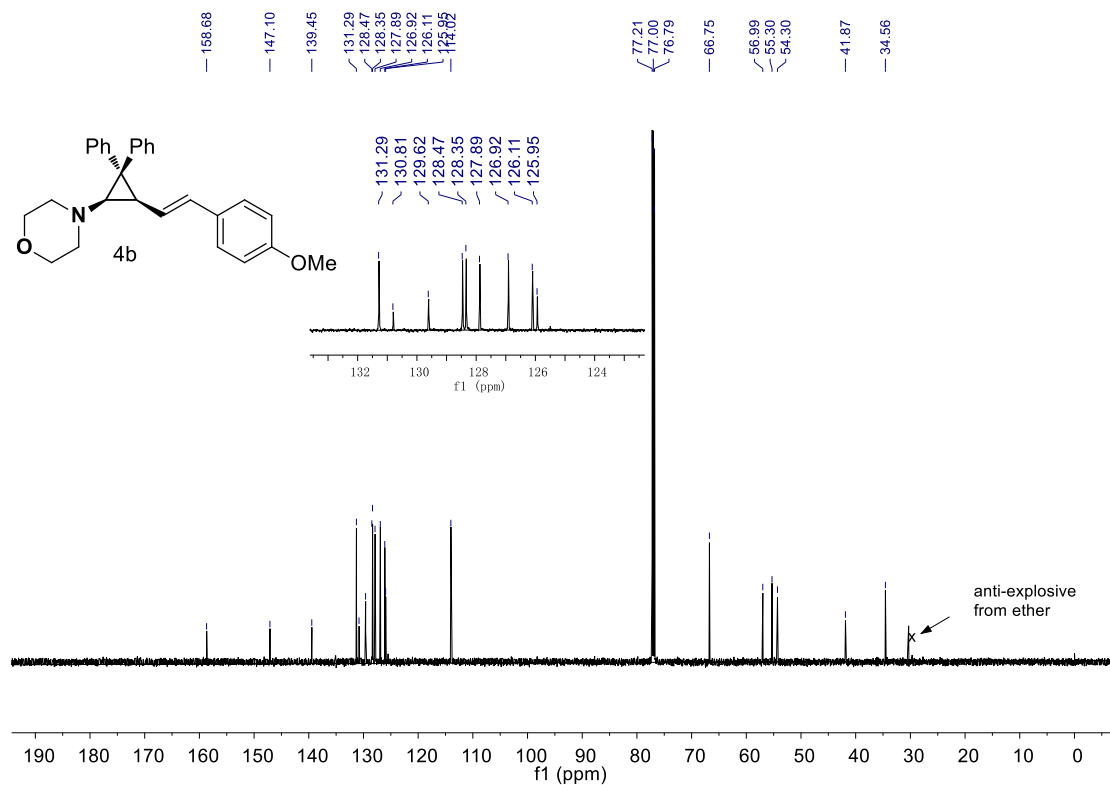

**$^{13}\text{C}$  NMR (150 MHz,  $\text{CDCl}_3$ ) spectrum for compound 4b.**

**HPLC Conditions:** CHIRALCEL OD-H column, 97/3 hexanes/*i*-PrOH, 0.4 mL/min;  $t_R$  (major) = 25.9 min,  $t_R$  (minor) = 27.6 min.

**Racemate:**

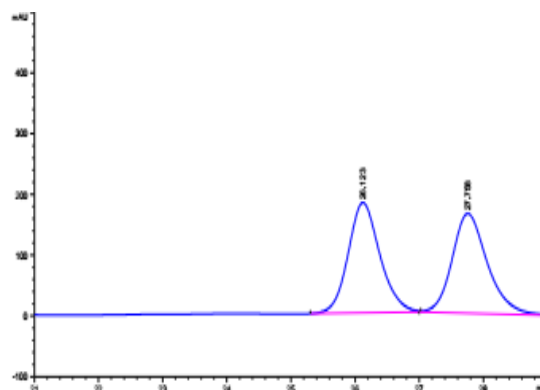

**Chiral sample:**

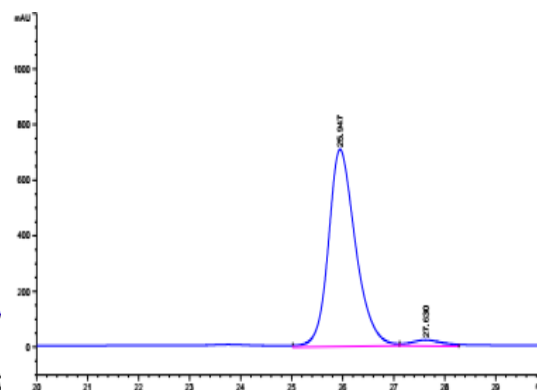

**Racemate:**

| Peak | PetTime | Type | Width(min) | Area(mAu*S) | Hight(mAu) | Area%   |
|------|---------|------|------------|-------------|------------|---------|
| 1    | 26.123  | MM R | 0.5737     | 181.49986   | 181.49986  | 49.9332 |
| 2    | 27.758  | MM R | 0.6181     | 6264.77979  | 164.16418  | 50.0668 |

**Chiral sample:**

| Peak | PetTime | Type | Width(min) | Area(mAu*S) | Hight(mAu) | Area%   |
|------|---------|------|------------|-------------|------------|---------|
| 1    | 25.947  | MM R | 0.6166     | 2.62541e4   | 709.69208  | 96.5046 |
| 2    | 27.630  | MM R | 0.7235     | 950.992908  | 21.90622   | 3.4954  |

**HPLC chromatograph for compound 4b.**

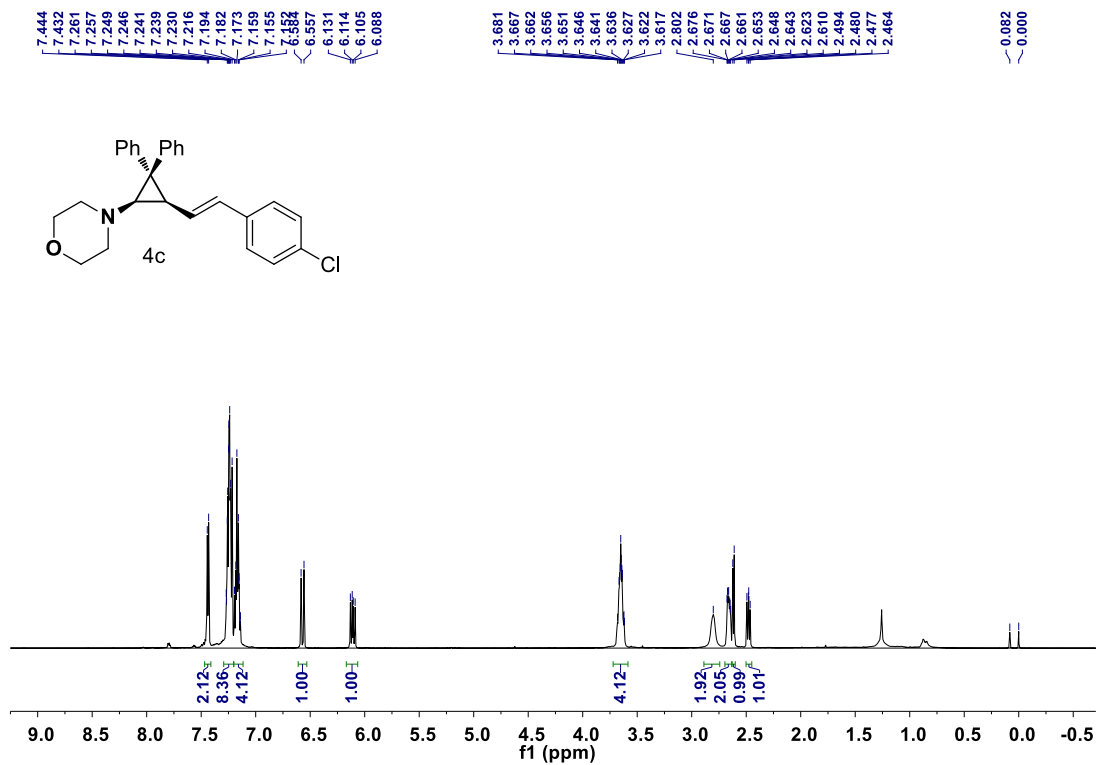

**<sup>1</sup>H NMR (600 MHz, CDCl<sub>3</sub>) spectrum for compound 4c.**

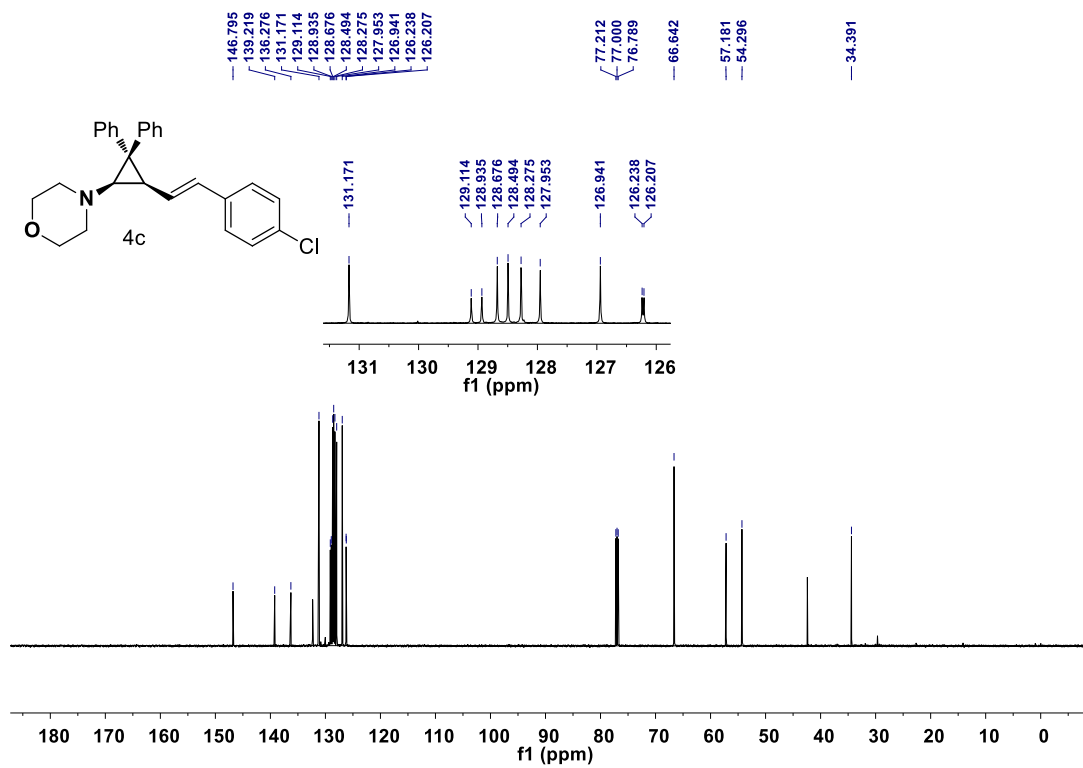

**<sup>13</sup>C NMR (150 MHz, CDCl<sub>3</sub>) spectrum for compound 4c.**

**HPLC Conditions:** CHIRALCEL AD-H column, 97/3 hexanes/*i*-PrOH, 0.6 mL/min;  $t_R$  (major) = 12.3 min,  $t_R$  (minor) = 13.4 min.

**Racemate:**

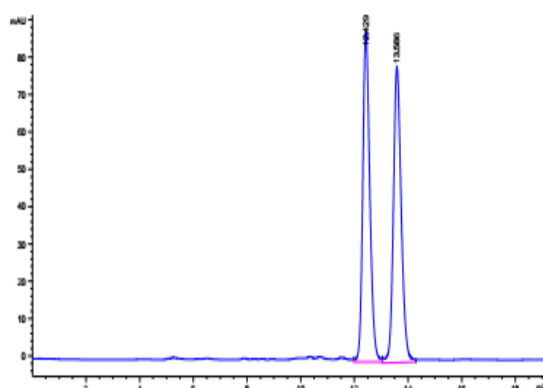

**Chiral sample:**

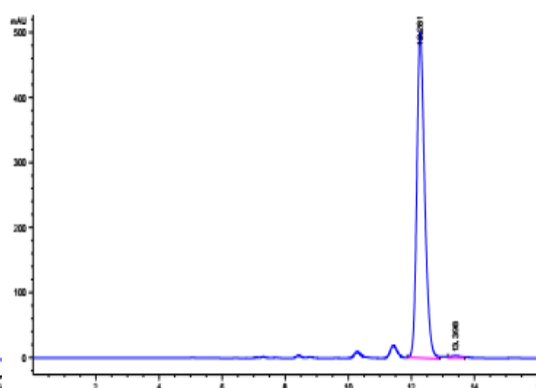

**Racemate:**

| Peak | PetTime | Type | Width(min) | Area(mAu*S) | Hight(mAu) | Area%   |
|------|---------|------|------------|-------------|------------|---------|
| 1    | 12.429  | MM R | 0.3038     | 1612.13782  | 88.44658   | 50.1221 |
| 2    | 13.586  | MM R | 0.3379     | 1604.28357  | 79.13845   | 49.8779 |

**Chiral sample:**

| Peak | PetTime | Type | Width(min) | Area(mAu*S) | Hight(mAu) | Area%   |
|------|---------|------|------------|-------------|------------|---------|
| 1    | 12.281  | MM R | 0.2879 8   | 8680.60352  | 502.60693  | 99.0691 |
| 2    | 13.398  | MM R | 0.3853     | 81.56821    | 3.52813    | 0.9309  |

**HPLC chromatograph for compound 4c.**

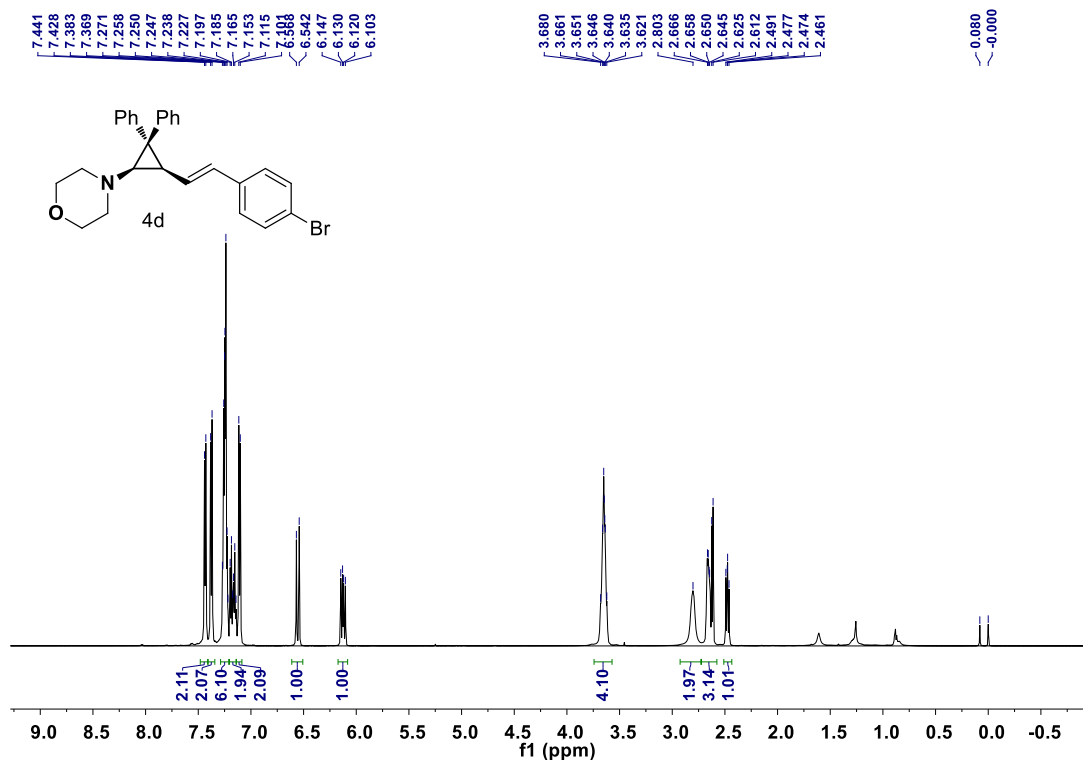

**<sup>1</sup>H NMR (600 MHz, CDCl<sub>3</sub>) spectrum for compound 4d.**

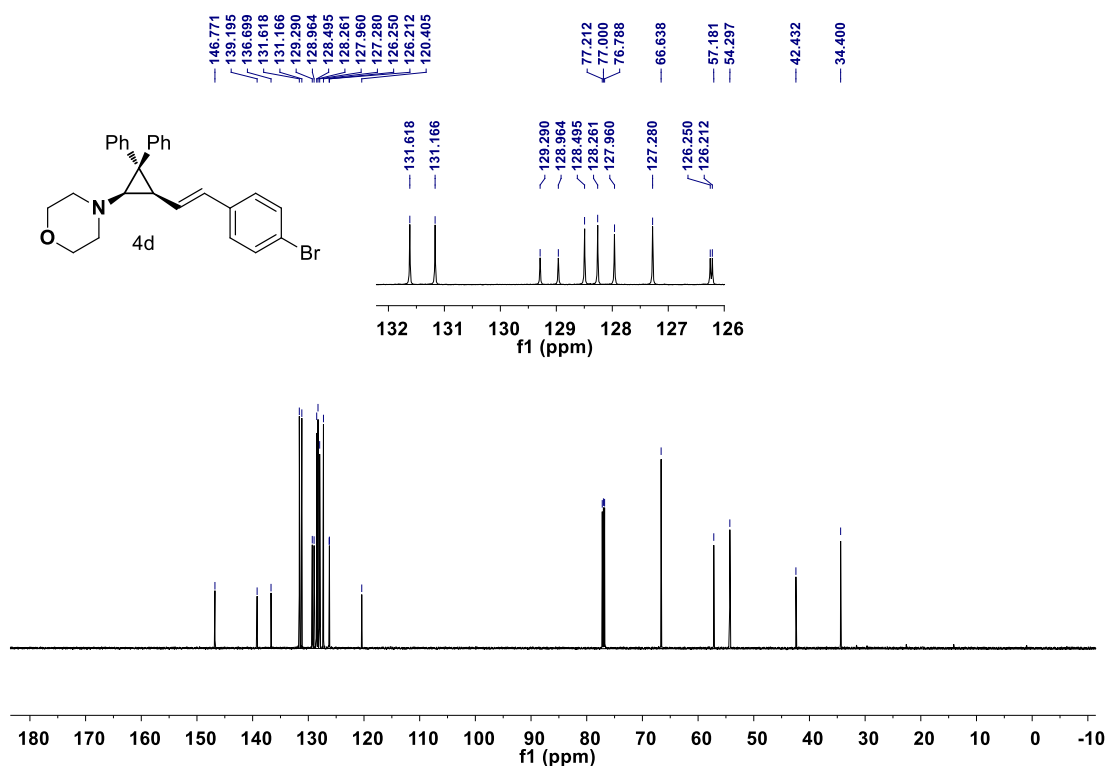

<sup>13</sup>C NMR (150 MHz, CDCl<sub>3</sub>) spectrum for compound 4d.

**HPLC Conditions:** CHIRALCEL AD-H column, 95/5 hexanes/*i*-PrOH, 0.8 mL/min; *t<sub>R</sub>* (major) = 8.4 min, *t<sub>R</sub>* (minor) = 10.1 min.

**Racemate:**

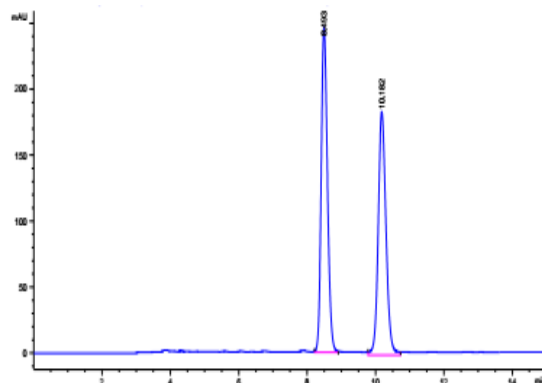

**Chiral sample:**

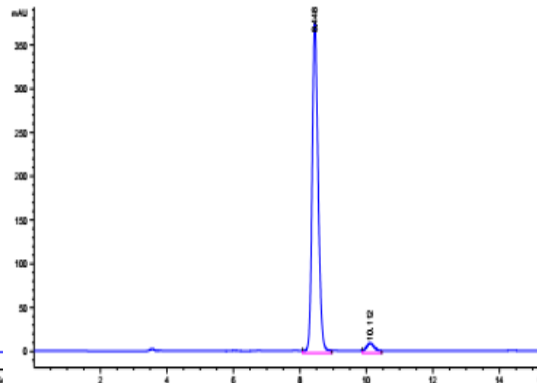

**Racemate:**

| Peak | PetTime | Type | Width(min) | Area(mAu*S) | Hight(mAu) | Area%   |
|------|---------|------|------------|-------------|------------|---------|
| 1    | 8.582   | MM R | 0.1932     | 3975.77441  | 343.04459  | 49.9702 |
| 2    | 9.260   | MM R | 0.2068     | 3980.50977  | 320.81049  | 50.0298 |

**Chiral sample:**

| Peak | PetTime | Type | Width(min) | Area(mAu*S) | Hight(mAu) | Area%   |
|------|---------|------|------------|-------------|------------|---------|
| 1    | 8.448   | MM R | 0.2115     | 4778.61182  | 376.63974  | 95.6211 |
| 2    | 10.112  | MM R | 0.3198     | 218.83397   | 11.40621   | 4.3789  |

**HPLC chromatograph for compound 4d.**

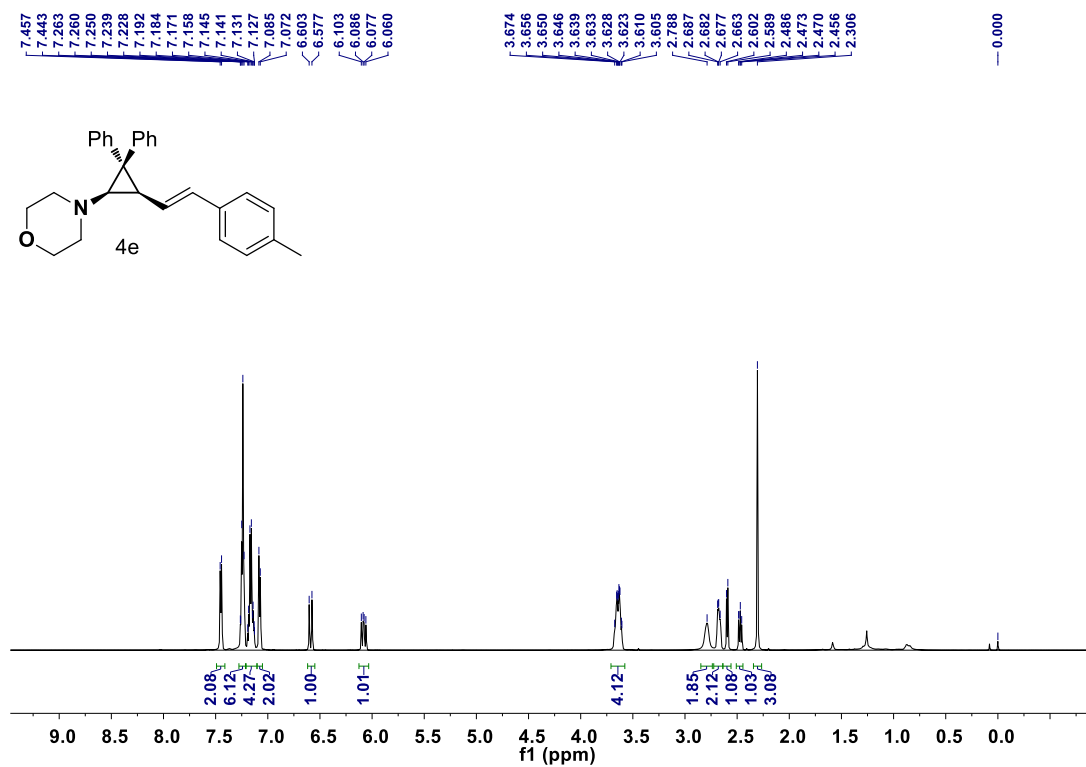

**<sup>1</sup>H NMR (600 MHz, CDCl<sub>3</sub>) spectrum for compound 4e.**

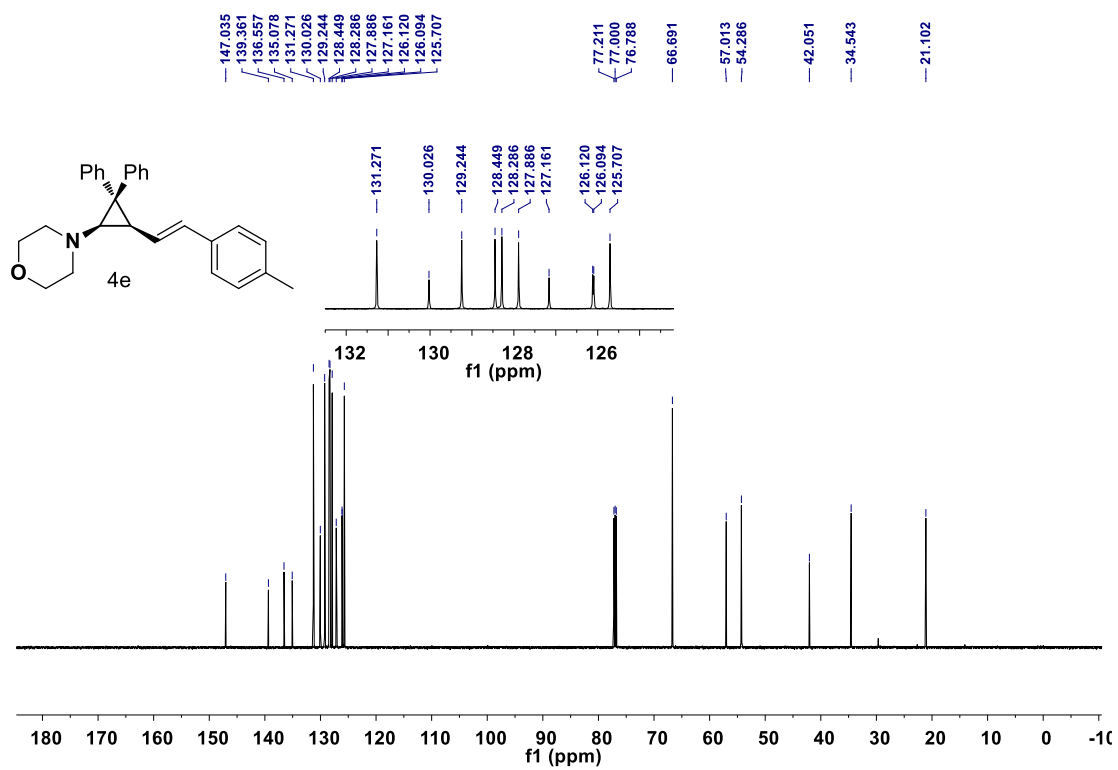

**<sup>13</sup>C NMR (150 MHz, CDCl<sub>3</sub>) spectrum for compound 4e.**

**HPLC Conditions:** CHIRALCEL AD-H column, 95/5 hexanes/*i*-PrOH, 0.6 mL/min;  $t_R$  (major) = 9.2 min,  $t_R$  (minor) = 8.5 min.

**Racemate:**

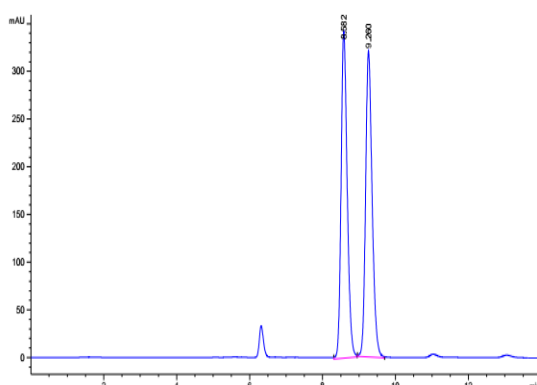

**Chiral sample:**

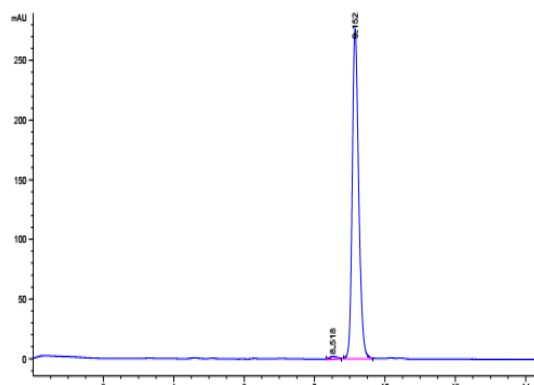

**Racemate:**

| Peak | PetTime | Type | Width(min) | Area(mAu*S) | Hight(mAu) | Area%   |
|------|---------|------|------------|-------------|------------|---------|
| 1    | 8.582   | MM R | 0.1932     | 3975.77441  | 343.04459  | 49.9702 |
| 2    | 9.260   | MM R | 0.2068     | 3980.50977  | 320.81049  | 50.0298 |

**Chiral sample:**

| Peak | PetTime | Type | Width(min) | Area(mAu*S) | Hight(mAu) | Area%   |
|------|---------|------|------------|-------------|------------|---------|
| 1    | 8.518   | MM R | 0.2506     | 34.81854    | 2.31534    | 0.9834  |
| 2    | 9.152   | MM R | 0.2117     | 3505.90698  | 276.04465  | 99.0166 |

**HPLC chromatograph for compound 4e.**

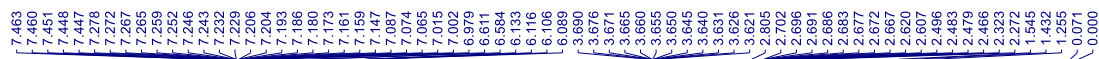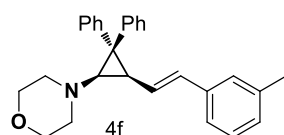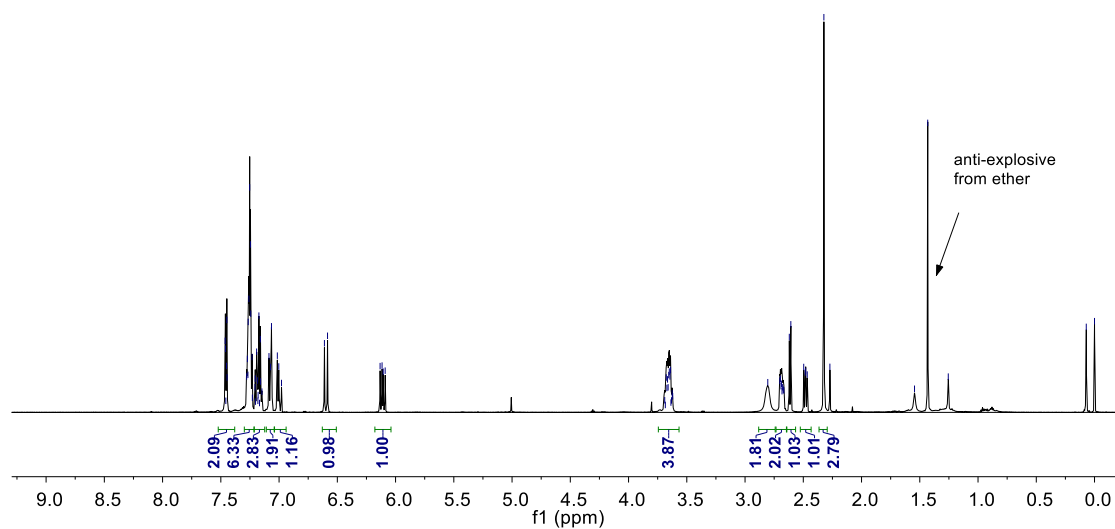

**$^1H$  NMR (600 MHz,  $CDCl_3$ ) spectrum for compound 4f.**

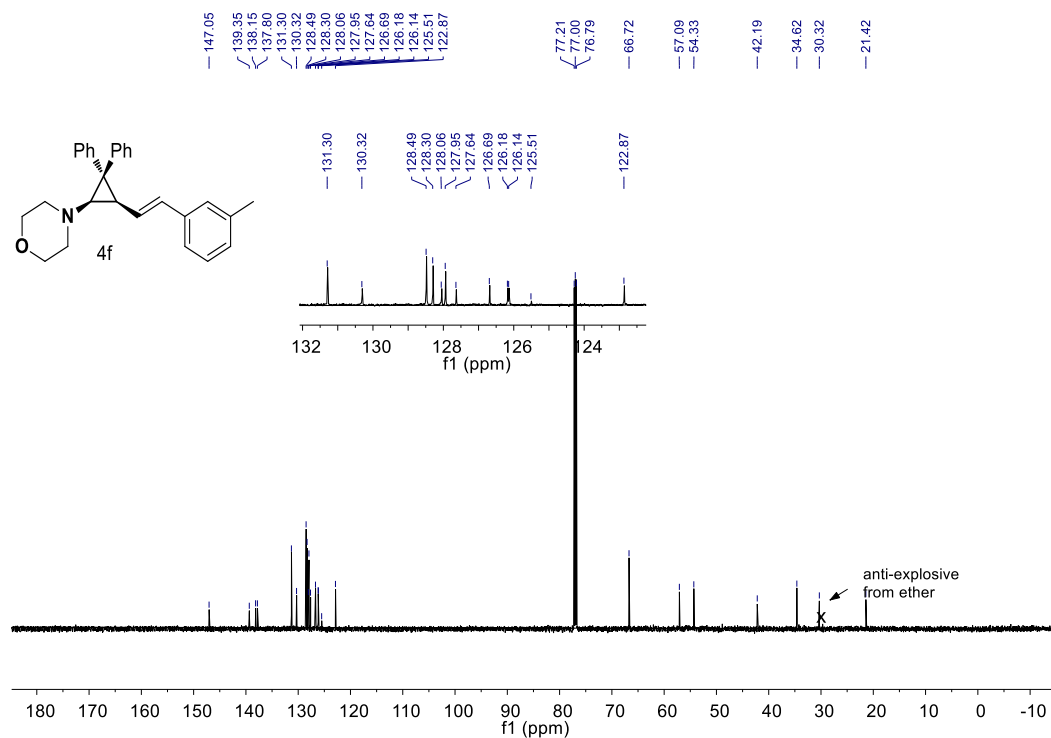

<sup>13</sup>C NMR (150 MHz, CDCl<sub>3</sub>) spectrum for compound 4f.

**HPLC conditions:** CHIRALCEL IA column, 98/2 hexanes/*i*-PrOH, 0.7 mL/min, *t*<sub>R</sub> (major) = 10.0 min, *t*<sub>R</sub> (minor) = 9.4 min.

**Racemate:**

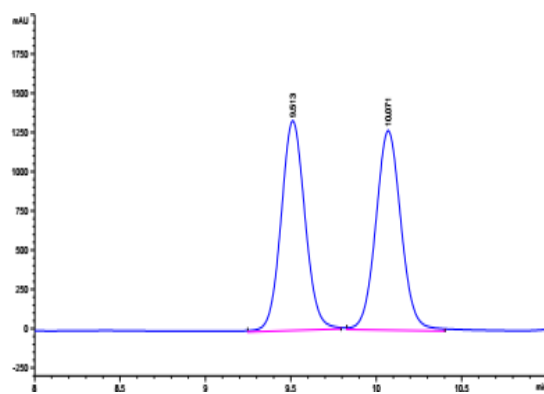

**Chiral sample:**

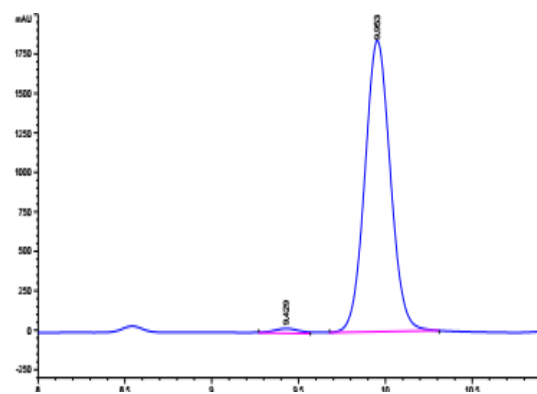

**Racemate:**

| Peak | PetTime | Type | Width(min) | Area(mAu*S) | Hight(mAu) | Area%   |
|------|---------|------|------------|-------------|------------|---------|
| 1    | 9.513   | MM R | 0.1618     | 1.29931e4   | 1335.14722 | 49.8141 |
| 2    | 10.171  | MM R | 0.1716     | 1.30901e4   | 1271.03967 | 50.0786 |

**Chiral sample:**

| Peak | PetTime | Type | Width(min) | Area(mAu*S) | Hight(mAu) | Area%   |
|------|---------|------|------------|-------------|------------|---------|
| 1    | 9.429   | MM R | 0.1697     | 306.25800   | 30.07751   | 5.1214  |
| 2    | 9.953   | MM R | 0.1701     | 1.88328e4   | 1845.03418 | 94.8786 |

**HPLC chromatograph for compound 4f.**



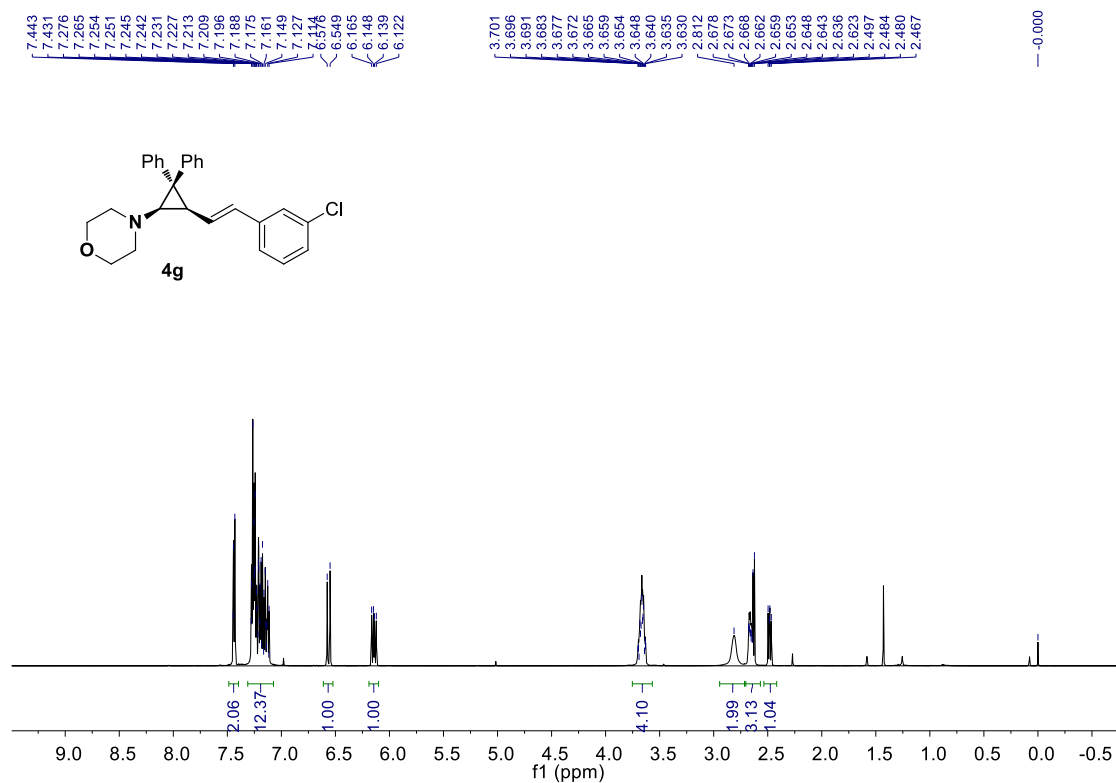

**<sup>1</sup>H NMR (600 MHz, CDCl<sub>3</sub>) spectrum for compound 4g.**

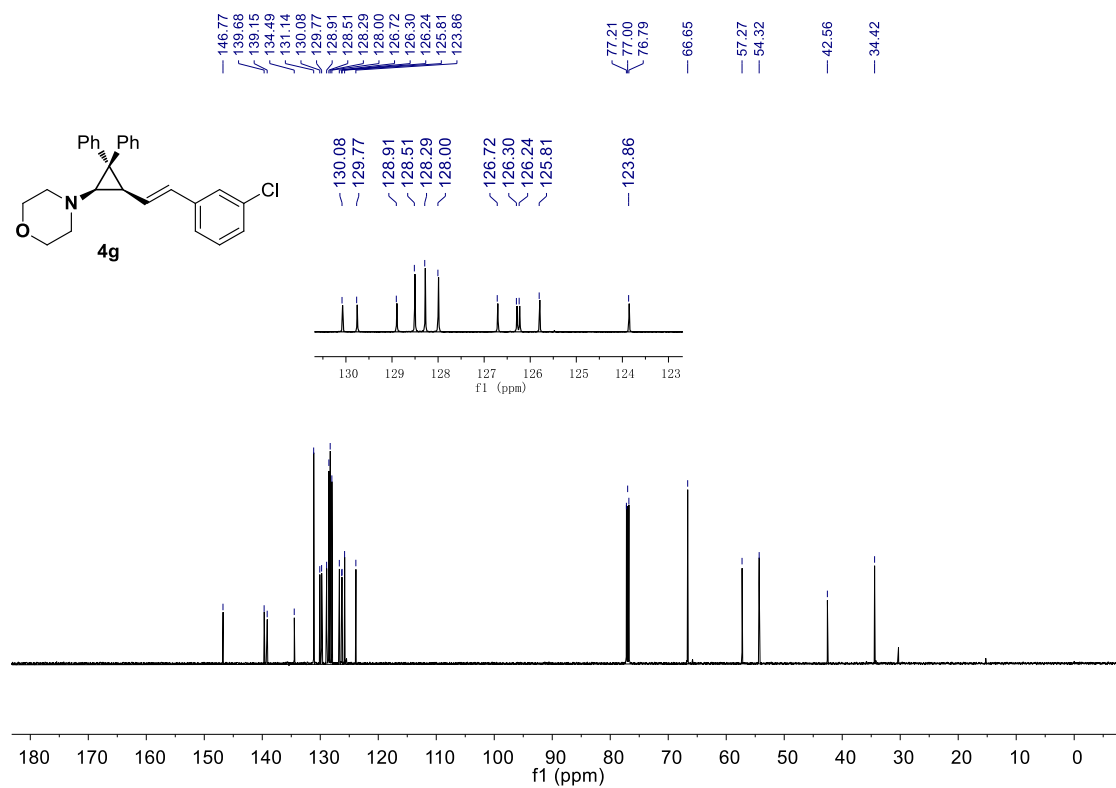

**<sup>13</sup>C NMR (150 MHz, CDCl<sub>3</sub>) spectrum for compound 4g.**

**HPLC Conditions:** CHIRALCEL AD-H column, 95/5 hexanes/*i*-PrOH, 0.8 mL/min;  $t_R$  (major) = 9.7 min,  $t_R$  (minor) = 8.7 min.

**Racemate:**

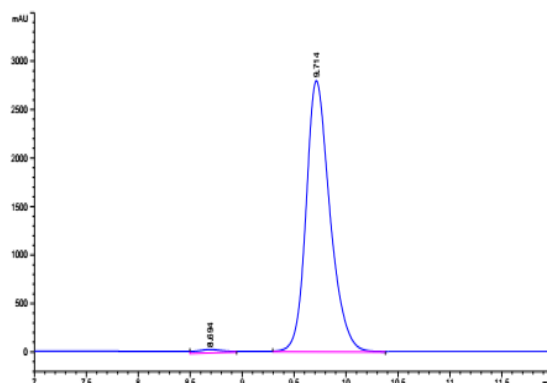

**Chiral sample:**

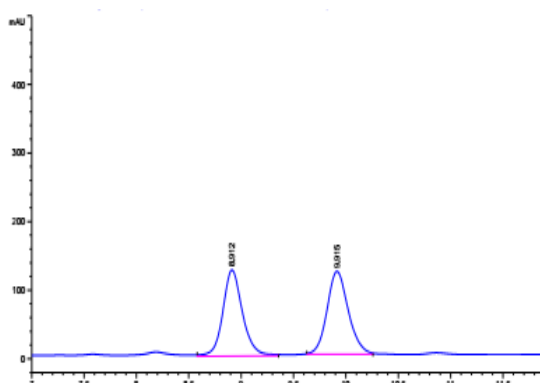

**Racemate:**

| Peak | PetTime | Type | Width(min) | Area(mAu*S) | Hight(mAu) | Area%   |
|------|---------|------|------------|-------------|------------|---------|
| 1    | 8.912   | MM R | 0.2184     | 1644.69714  | 125.50198  | 49.2228 |
| 2    | 9.915   | MM R | 0.2344     | 1696.63623  | 120.64114  | 50.7772 |

**Chiral sample:**

| Peak | PetTime | Type | Width(min) | Area(mAu*S) | Hight(mAu) | Area%   |
|------|---------|------|------------|-------------|------------|---------|
| 1    | 8.694   | MM R | 0.2912     | 633.22302   | 36.24260   | 1.3947  |
| 2    | 9.714   | MM R | 0.2667     | 4.47679e4   | 2797.74609 | 98.6053 |

**HPLC chromatograph for compound 4g.**

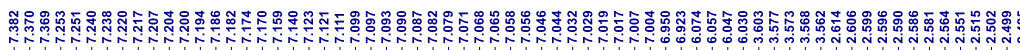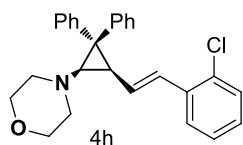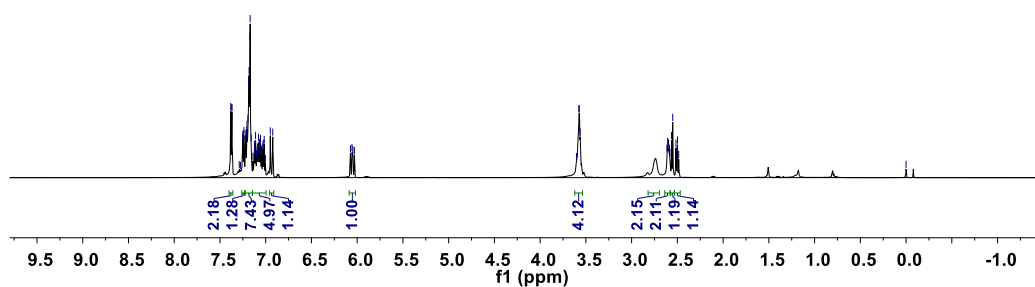

**$^1\text{H}$  NMR (600 MHz,  $\text{CDCl}_3$ ) spectrum for compound 4h.**

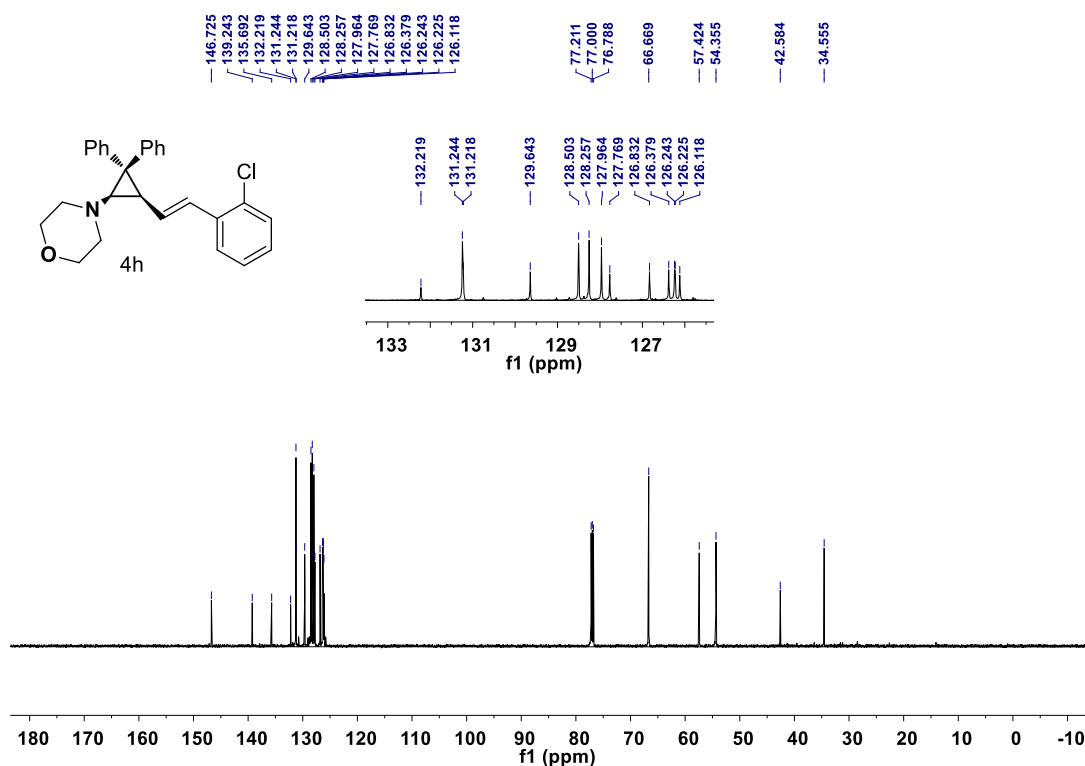

$^{13}\text{C}$  NMR (150 MHz,  $\text{CDCl}_3$ ) spectrum for compound 4h.

**HPLC Conditions:** CHIRALCEL IC column, 99/1 hexanes/*i*-PrOH, 0.4 mL/min;  $t_R$  (major) = 18.3 min,  $t_R$  (minor) = 17.5 min.

**Racemate:**

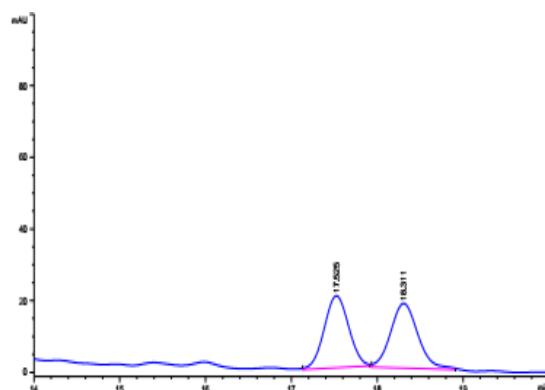

**Chiral sample:**

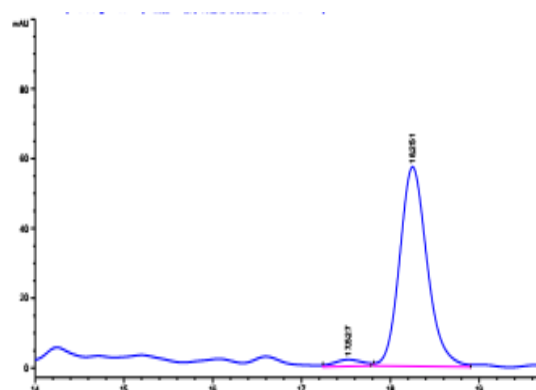

**Racemate:**

| Peak | PetTime | Type | Width(min) | Area(mAu*S) | Hight(mAu) | Area%   |
|------|---------|------|------------|-------------|------------|---------|
| 1    | 17.525  | MM R | 0.3310     | 398.63031   | 20.06940   | 49.9363 |
| 2    | 18.311  | MM R | 0.3691     | 399.64743   | 18.04430   | 50.0637 |

**Chiral sample:**

| Peak | PetTime | Type | Width(min) | Area(mAu*S) | Hight(mAu) | Area%   |
|------|---------|------|------------|-------------|------------|---------|
| 1    | 17.527  | MM R | 0.3596     | 41.92551    | 1.94316    | 3.2962  |
| 2    | 18.251  | MM R | 0.3588     | 1230.02783  | 57.13962   | 96.7038 |

**HPLC chromatograph for compound 4h.**

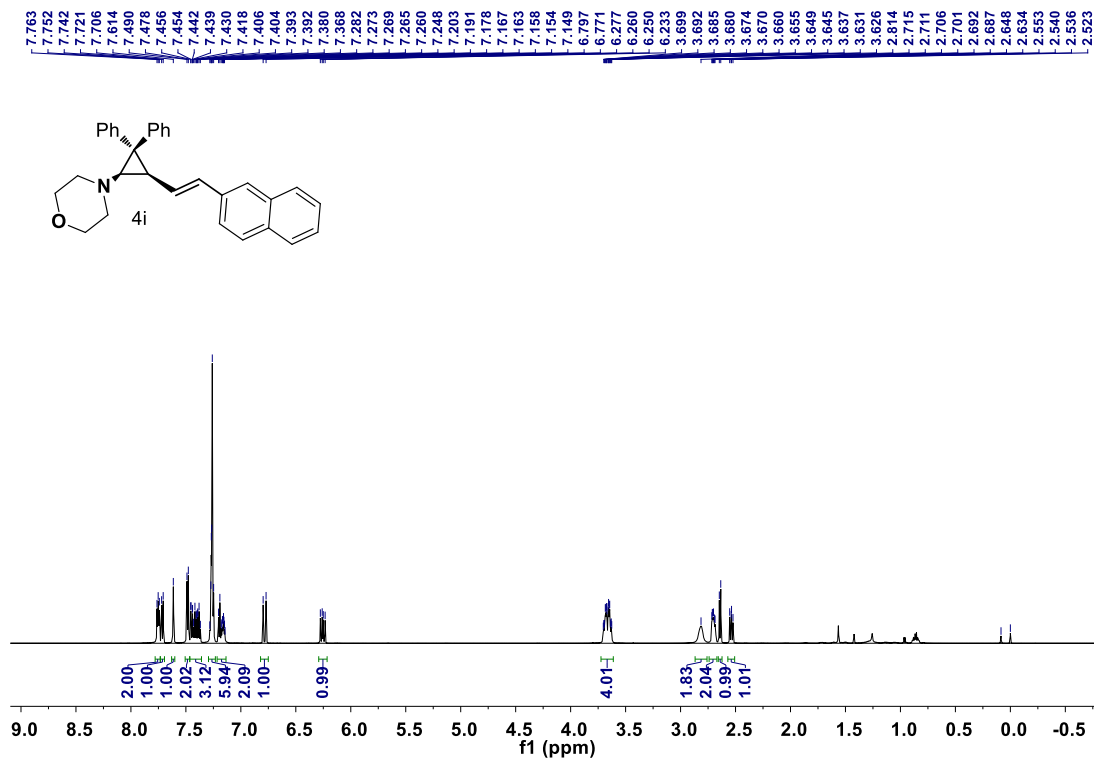

$^1\text{H}$  NMR (600 MHz,  $\text{CDCl}_3$ ) spectrum for compound 4i.

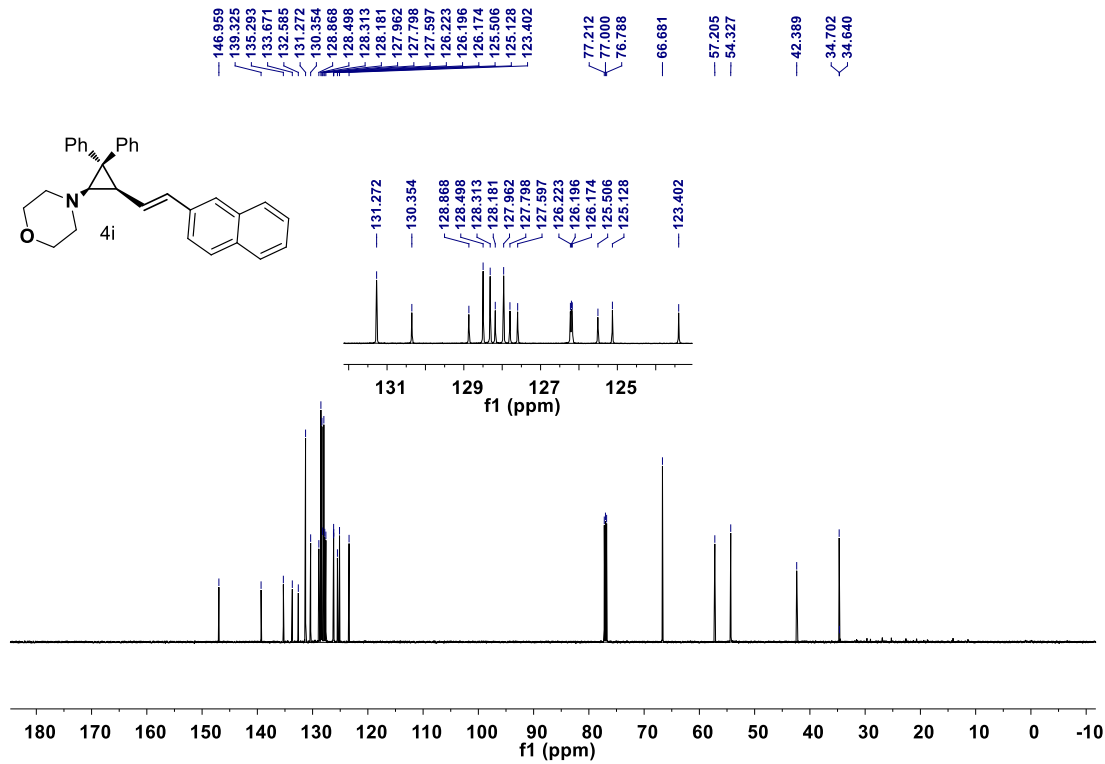

$^{13}\text{C}$  NMR (150 MHz,  $\text{CDCl}_3$ ) spectrum for compound 4i.

**HPLC Conditions:** CHIRALCEL IC column, 95/5 hexanes/*i*-PrOH, 0.8 mL/min;  $t_R$  (major) = 8.7 min,  $t_R$  (minor) = 8.1 min.

**Racemate:**

**Chiral sample:**

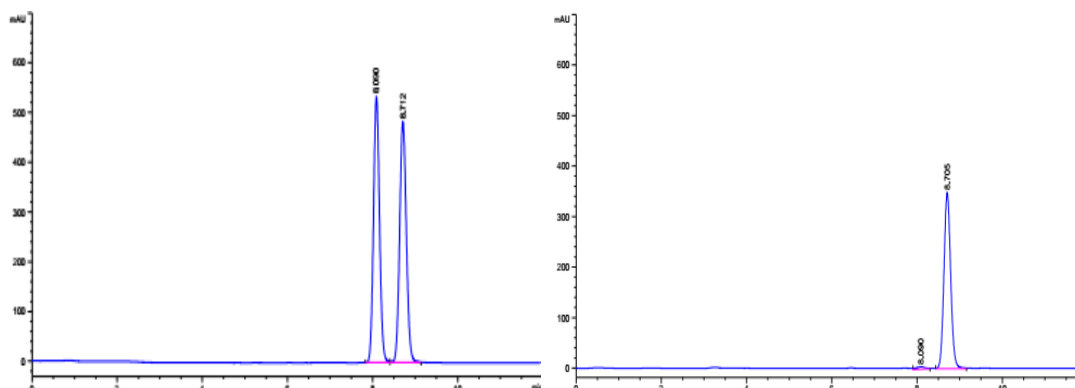

**Racemate:**

| Peak | PetTime | Type | Width(min) | Area(mAu*S) | Hight(mAu) | Area%   |
|------|---------|------|------------|-------------|------------|---------|
| 1    | 8.090   | MM R | 0.1639     | 5243.91357  | 533.32489  | 49.8954 |
| 2    | 8.712   | MM R | 0.1814     | 5265.90039  | 483.91769  | 50.1046 |

**Chiral sample:**

| Peak | PetTime | Type | Width(min) | Area(mAu*S) | Hight(mAu) | Area%   |
|------|---------|------|------------|-------------|------------|---------|
| 1    | 8.090   | MM R | 0.2447     | 69.57803    | 4.73834    | 1.7752  |
| 2    | 8.705   | MM R | 0.1840     | 3849.79248  | 348.68872  | 98.2248 |

**HPLC chromatograph for compound 4i.**

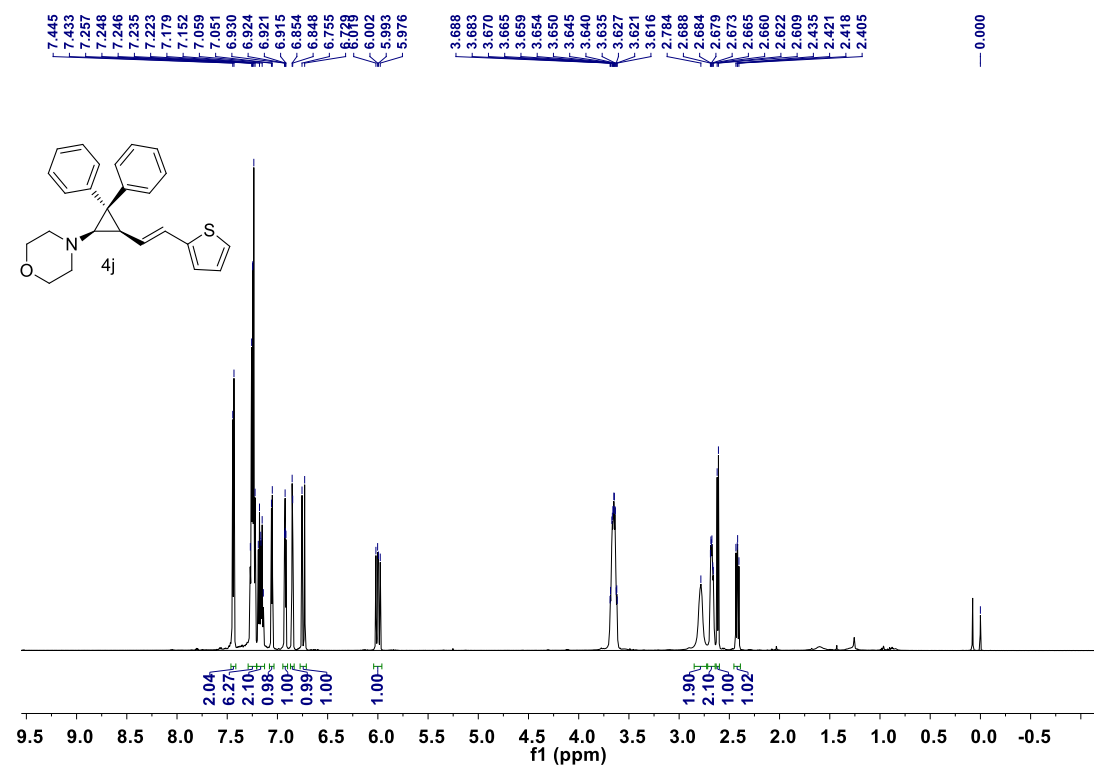

**$^1\text{H}$  NMR (600 MHz,  $\text{CDCl}_3$ ) spectrum for compound 4j.**

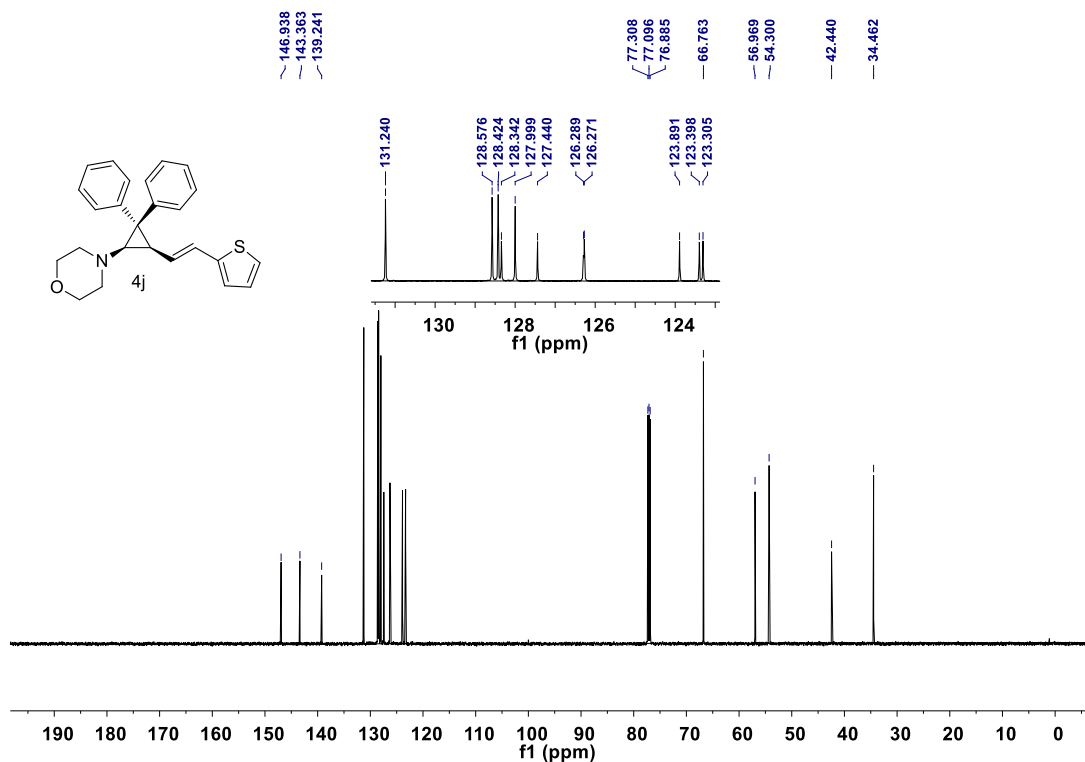

$^{13}\text{C}$  NMR (150 MHz,  $\text{CDCl}_3$ ) spectrum for compound **4j**.

**HPLC Conditions:** CHIRALCEL IA column, 95/5 hexanes/*i*-PrOH, 0.8 mL/min;  $t_R$  (major) = 8.8 min,  $t_R$  (minor) = 7.5 min.

**Racemate:**

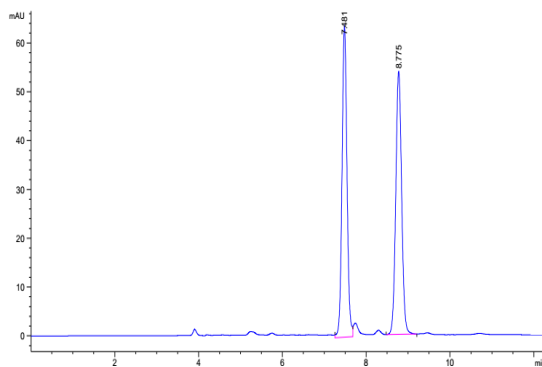

**Chiral sample:**

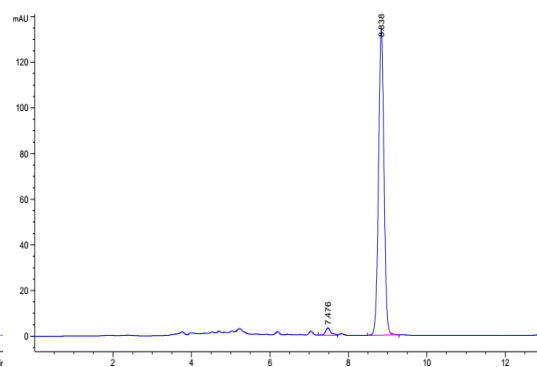

**Racemate:**

| Peak | PetTime | Type | Width(min) | Area(mAu*S) | Hight(mAu) | Area%   |
|------|---------|------|------------|-------------|------------|---------|
| 1    | 7.418   | MM R | 0.1381     | 527.54755   | 63.65674   | 50.3250 |
| 2    | 8.775   | MM R | 0.1488     | 520.73370   | 53.84904   | 49.6750 |

**Chiral sample:**

| Peak | PetTime | Type | Width(min) | Area(mAu*S) | Hight(mAu) | Area%   |
|------|---------|------|------------|-------------|------------|---------|
| 1    | 7.476   | MM R | 0.1396     | 3.22048     | 3.22048    | 2.2802  |
| 2    | 8.838   | MM R | 0.1498     | 134.08609   | 134.08609  | 97.7198 |

**HPLC chromatograph for compound **4j**.**

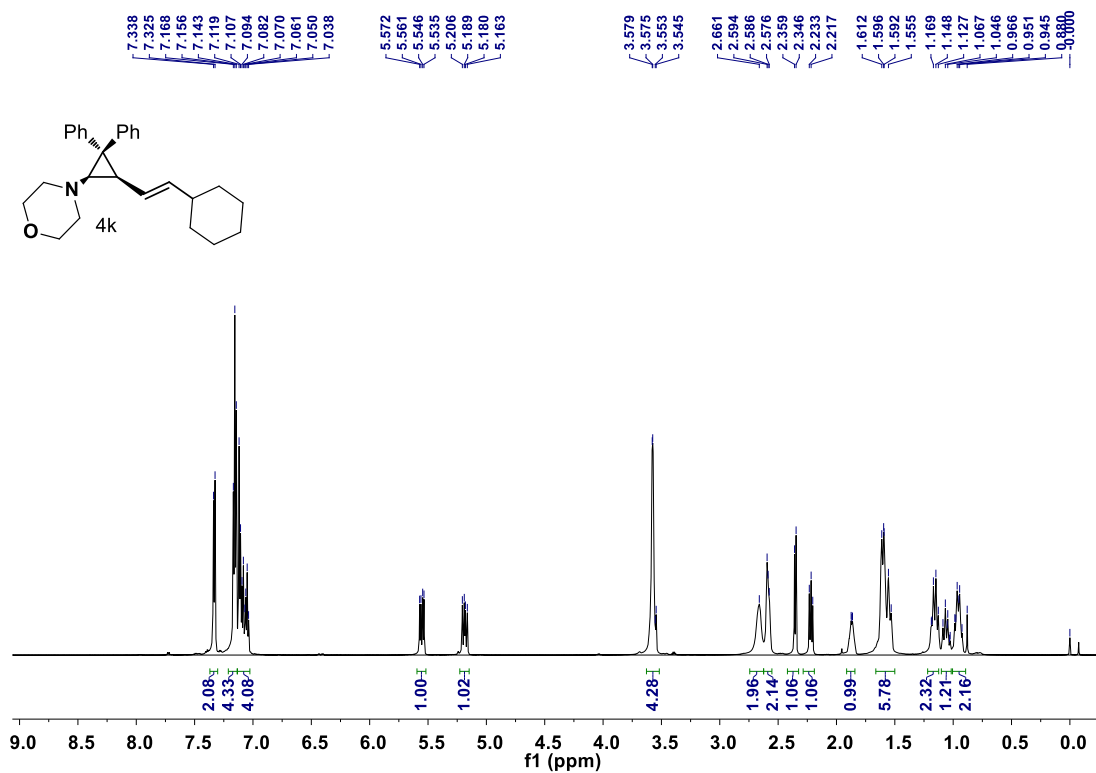

**<sup>1</sup>H NMR (600 MHz, CDCl<sub>3</sub>) spectrum for compound 4k.**

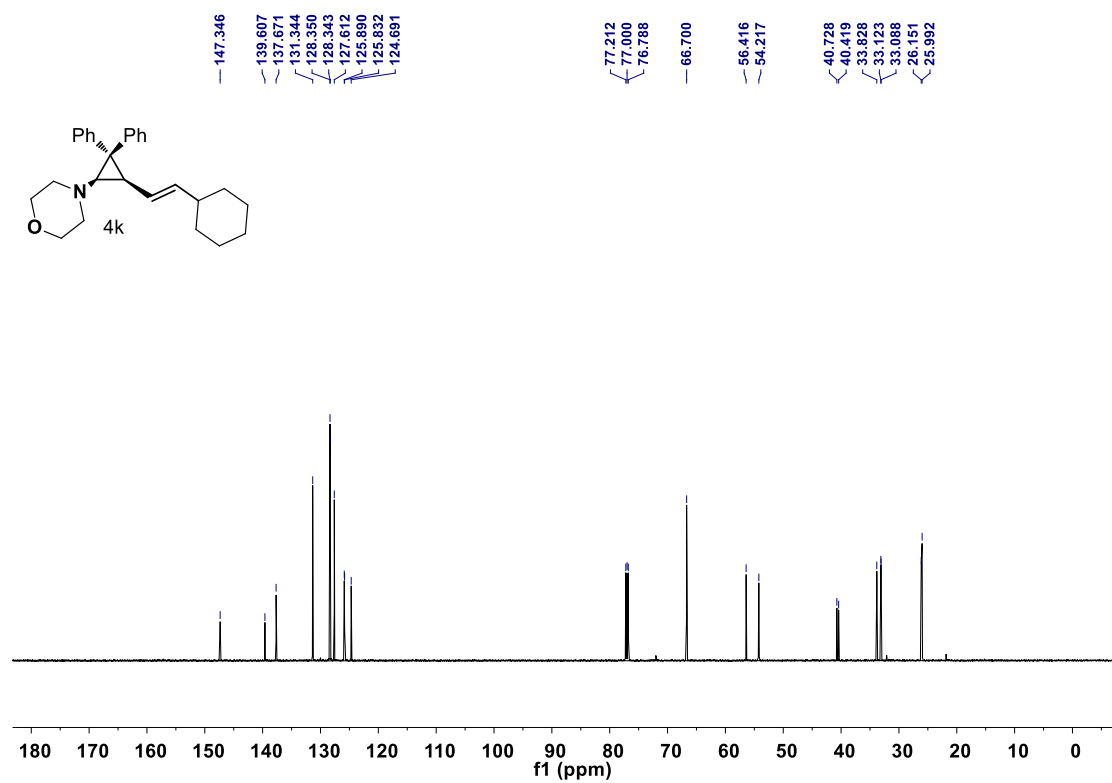

**<sup>13</sup>C NMR (150 MHz, CDCl<sub>3</sub>) spectrum for compound 4k.**

**HPLC Conditions:** CHIRALCEL IA column, 97/3 hexanes/*i*-PrOH, 0.6 mL/min;  $t_R$  (major) = 7.4 min,  $t_R$  (minor) = 7.1 min.

**Racemate:**

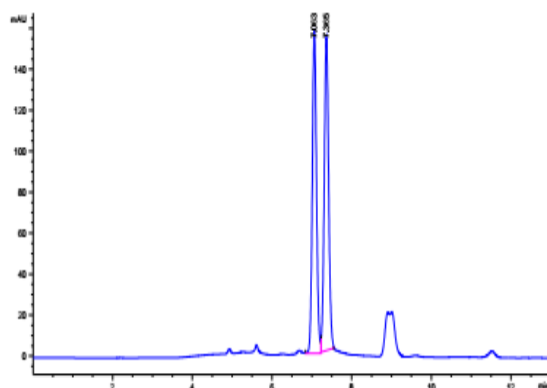

**Chiral sample:**

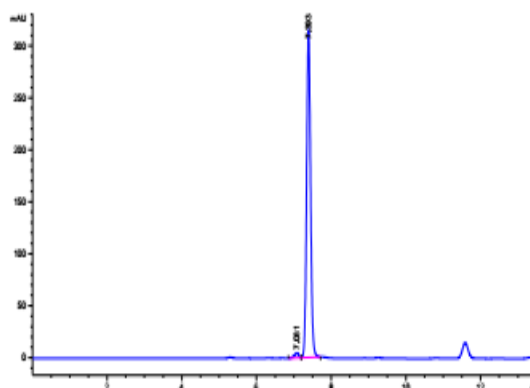

**Racemate:**

| Peak | PetTime | Type | Width(min) | Area(mAu*S) | Hight(mAu) | Area%   |
|------|---------|------|------------|-------------|------------|---------|
| 1    | 7.063   | MM R | 0.1213     | 1152.23206  | 158.31845  | 49.6055 |
| 2    | 7.365   | MM R | 0.1275     | 1170.55823  | 153.07063  | 50.3945 |

**Chiral sample:**

| Peak | PetTime | Type | Width(min) | Area(mAu*S) | Hight(mAu) | Area%   |
|------|---------|------|------------|-------------|------------|---------|
| 1    | 7.081   | MM R | 0.1184     | 38.27110    | 4.77997    | 1.6274  |
| 2    | 7.393   | MM R | 0.1137     | 2313.35474  | 314.74539  | 98.3726 |

**HPLC chromatograph for compound 4k.**

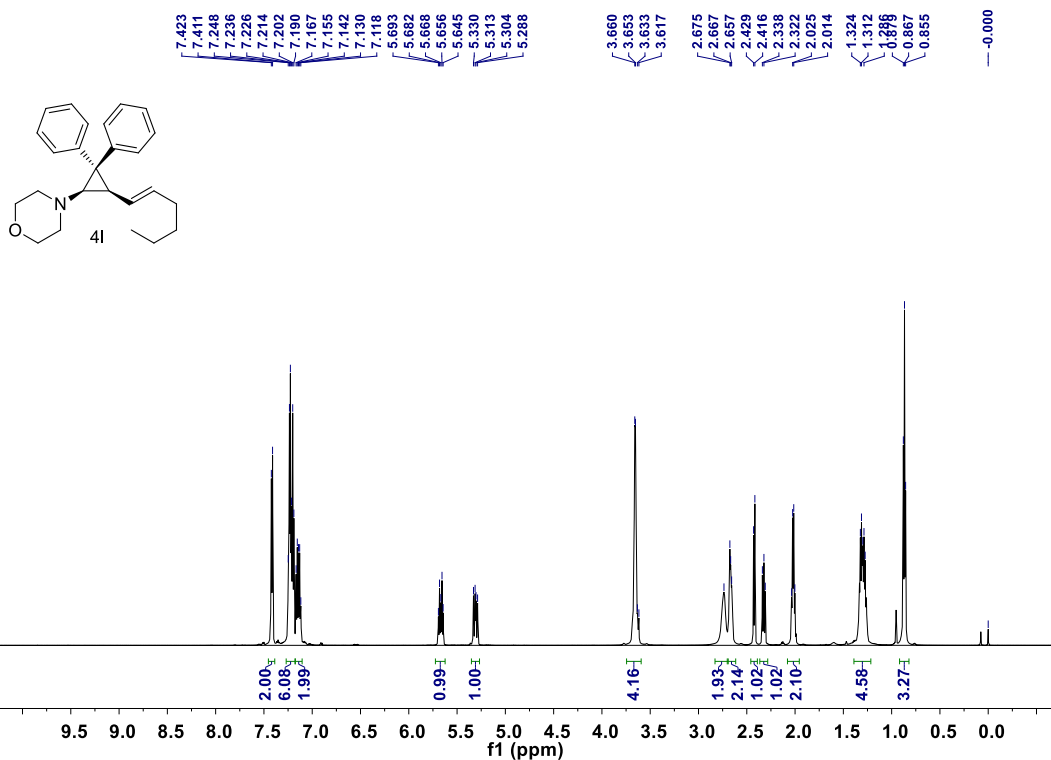

**<sup>1</sup>H NMR (600 MHz, CDCl<sub>3</sub>) spectrum for compound 4l.**



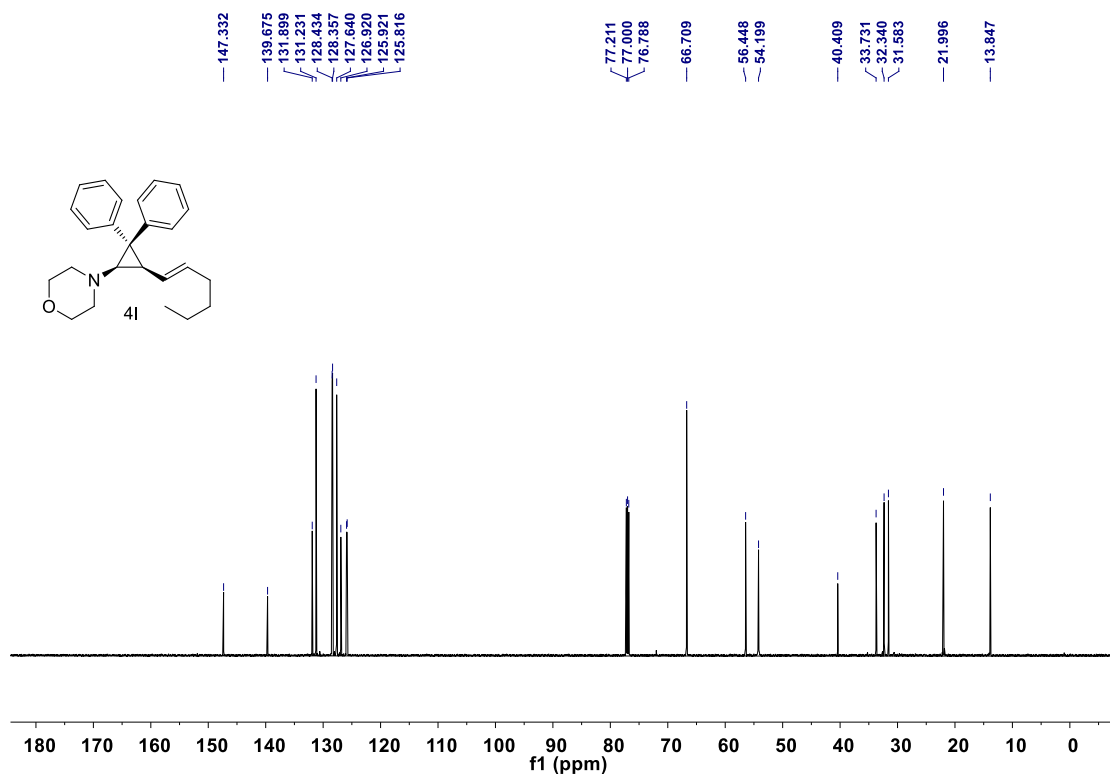

**$^{13}\text{C}$  NMR (150 MHz,  $\text{CDCl}_3$ ) spectrum for compound 4l.**

**HPLC Conditions:** CHIRALCEL AD-H column, 96/4 hexanes/*i*-PrOH, 0.8 mL/min;  $t_R$  (major) = 4.8 min,  $t_R$  (minor) = 4.5 min.

**Racemate:**

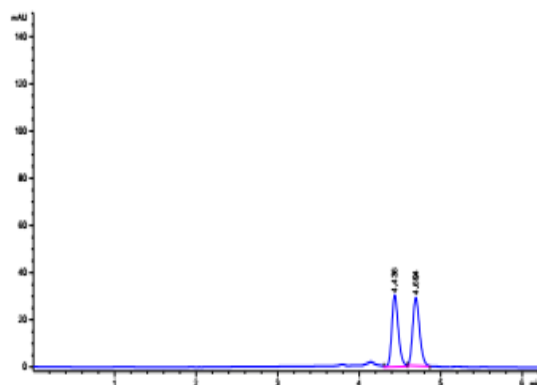

**Chiral sample:**

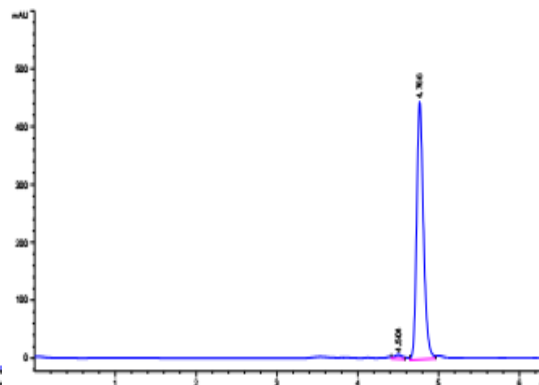

**Racemate:**

| Peak | PetTime | Type | Width(min) | Area(mAu*S) | Hight(mAu) | Area%   |
|------|---------|------|------------|-------------|------------|---------|
| 1    | 4.436   | MM R | 0.0929     | 169.67908   | 30.44222   | 49.7702 |
| 2    | 4.694   | MM R | 0.0988     | 171.24626   | 28.88927   | 50.2298 |

**Chiral sample:**

| Peak | PetTime | Type | Width(min) | Area(mAu*S) | Hight(mAu) | Area%   |
|------|---------|------|------------|-------------|------------|---------|
| 1    | 4.504   | MM R | 0.1108     | 48.53121    | 7.29815    | 1.8270  |
| 2    | 4.766   | MM R | 0.0977     | 2607.73828  | 444.86124  | 98.1730 |

**HPLC chromatograph for compound 4l.**

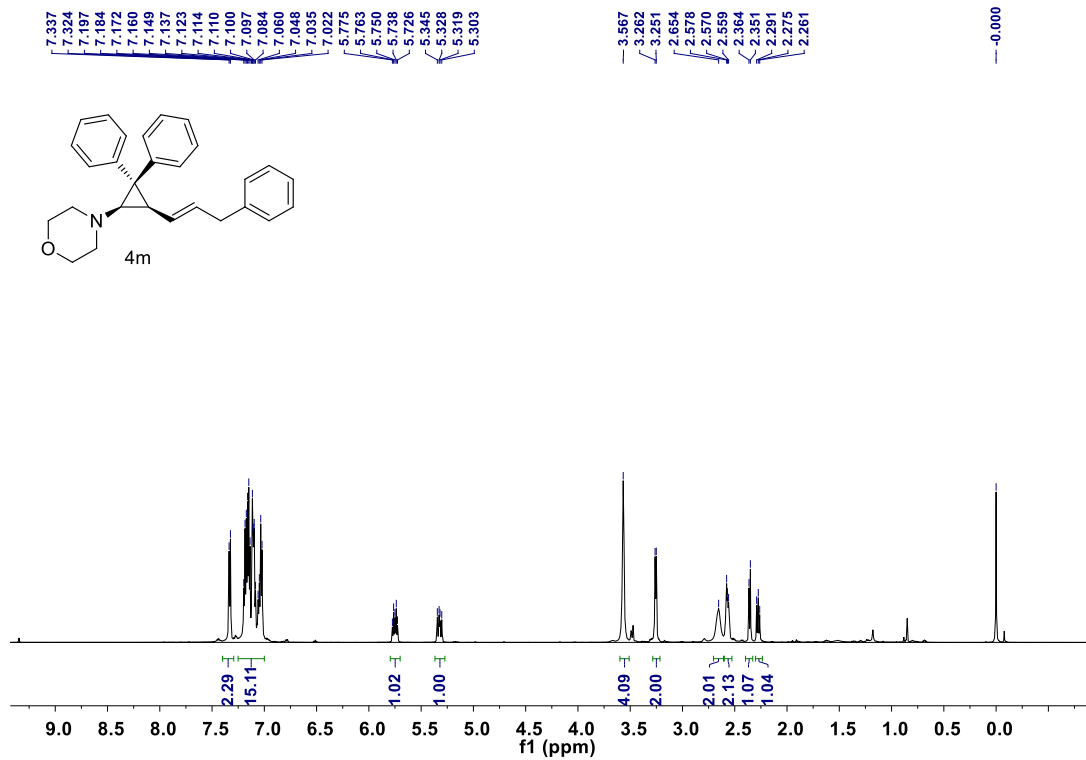

**<sup>1</sup>H NMR (600 MHz, CDCl<sub>3</sub>) spectrum for compound 4m.**

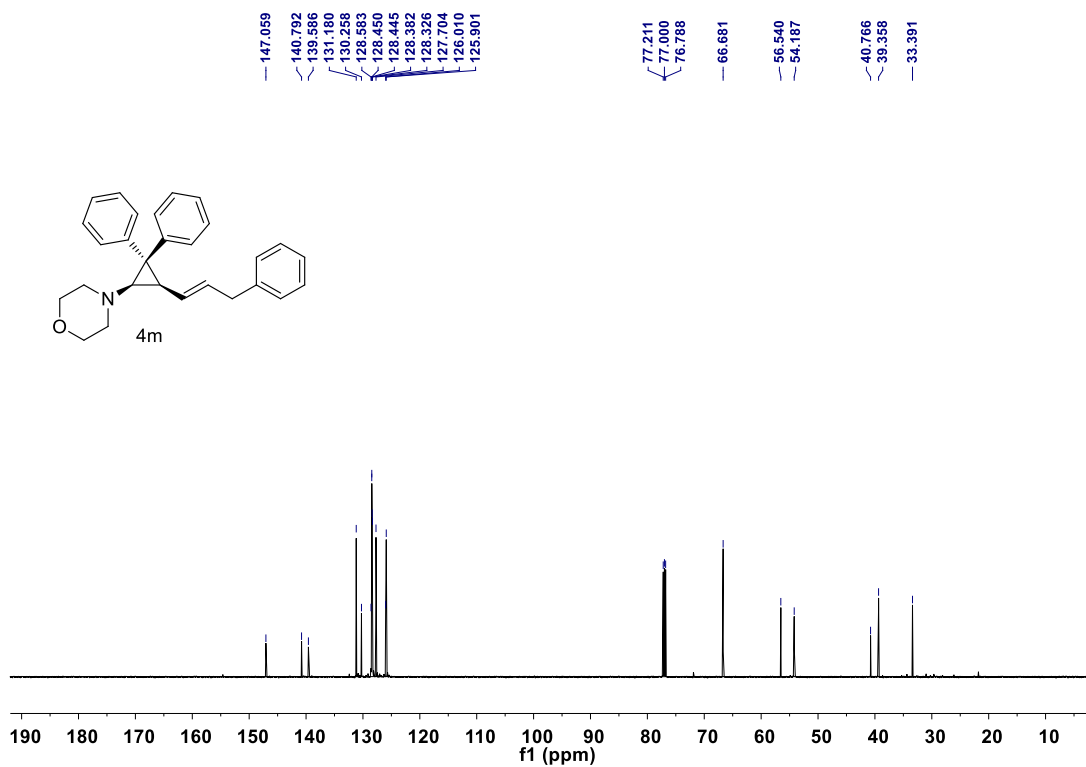

**<sup>13</sup>C NMR (150 MHz, CDCl<sub>3</sub>) spectrum for compound 4m.**

**HPLC Conditions:** CHIRALCEL AD-H column, 95/5 hexanes/*i*-PrOH, 0.8 mL/min;  $t_R$  (major) = 6.2 min,  $t_R$  (minor) = 5.7 min.

**Racemate:**

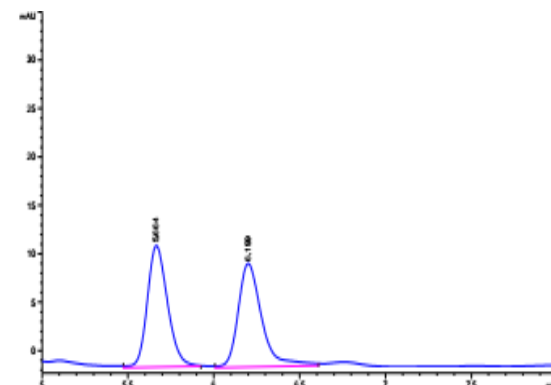

**Chiral sample:**

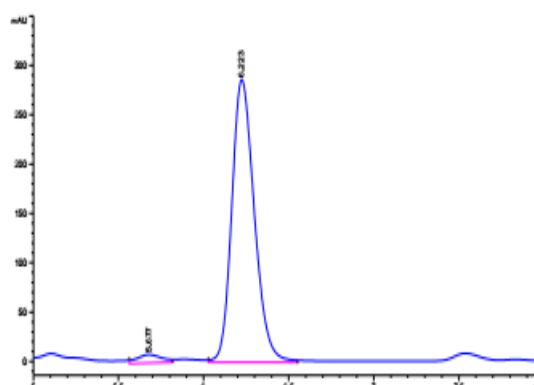

**Racemate:**

| Peak | PetTime | Type | Width(min) | Area(mAu*S) | Hight(mAu) | Area%   |
|------|---------|------|------------|-------------|------------|---------|
| 1    | 5.664   | MM R | 0.1369     | 103.06401   | 12.54835   | 50.2815 |
| 2    | 6.199   | MM R | 0.1588     | 101.90999   | 10.69304   | 49.7185 |

**Chiral sample:**

| Peak | PetTime | Type | Width(min) | Area(mAu*S) | Hight(mAu) | Area%   |
|------|---------|------|------------|-------------|------------|---------|
| 1    | 5.677   | MM R | 0.1677     | 85.06754    | 8.45541    | 3.1206  |
| 2    | 6.223   | MM R | 0.1531     | 2640.91992  | 286.55582  | 96.8794 |

**HPLC chromatograph for compound 4m.**

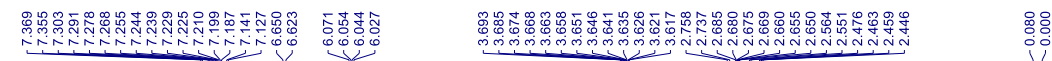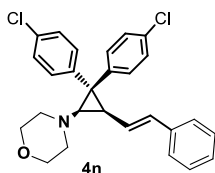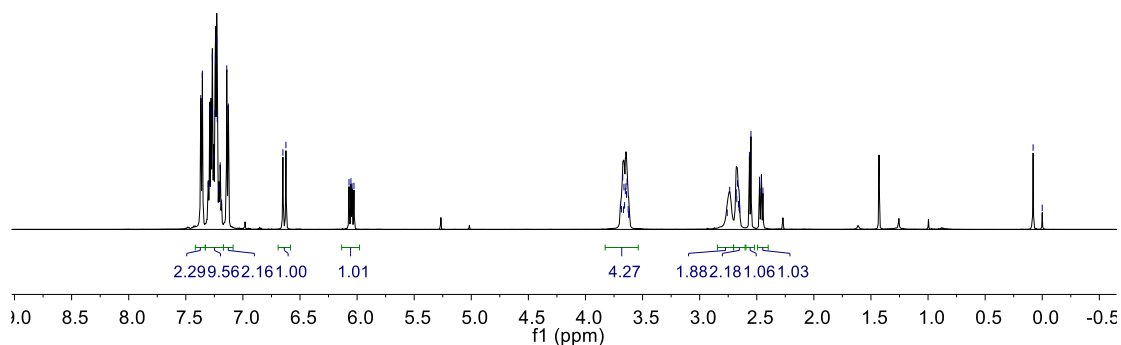

$^1H$  NMR (600 MHz,  $CDCl_3$ ) spectrum for compound 4n.

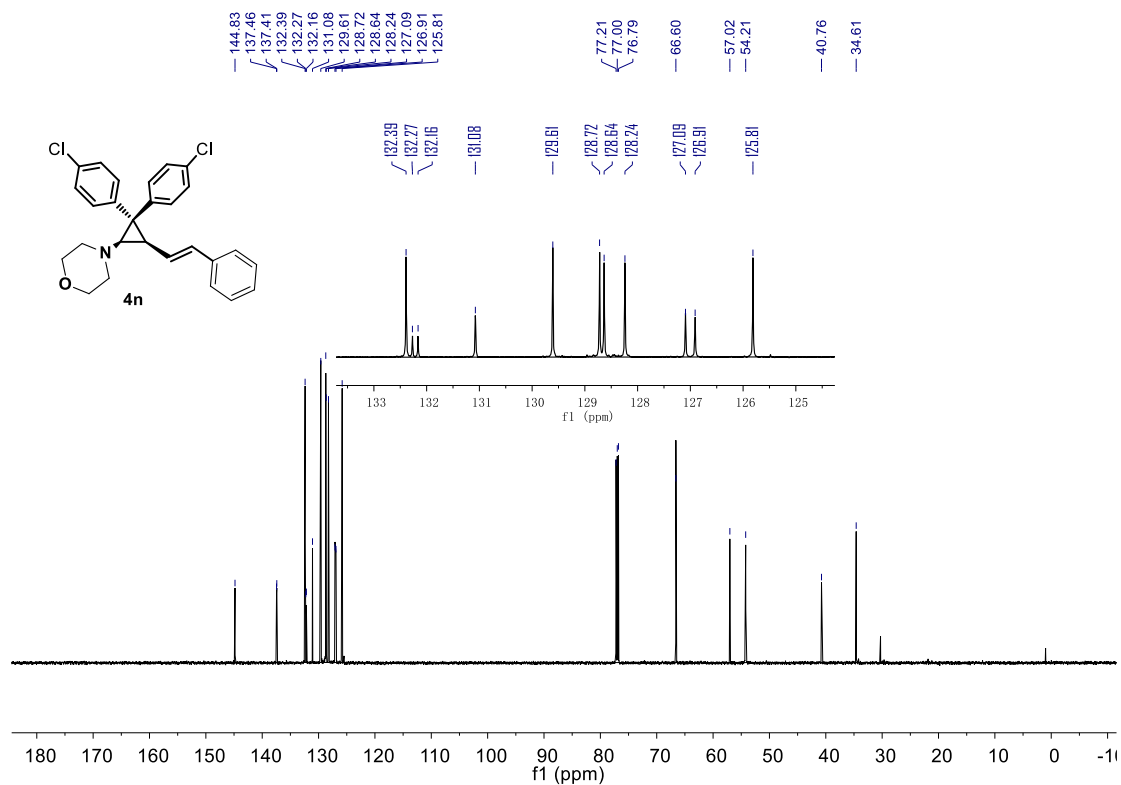

**<sup>13</sup>C NMR (150 MHz, CDCl<sub>3</sub>) spectrum for compound 4n.**

**HPLC Conditions:** CHIRALCEL IA-H column, 95/5 hexanes/*i*-PrOH, 0.5 mL/min; *t<sub>R</sub>* (major) = 19.1 min, *t<sub>R</sub>* (minor) = 16.8 min.

**Racemate:**

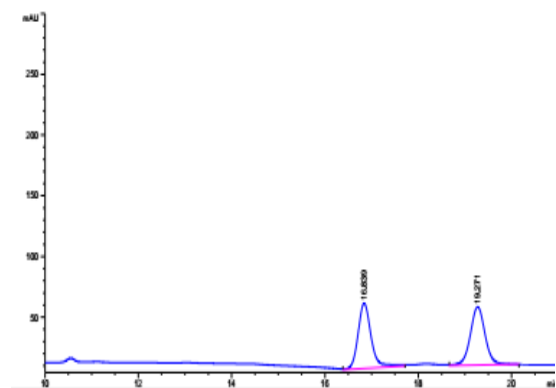

**Chiral sample:**

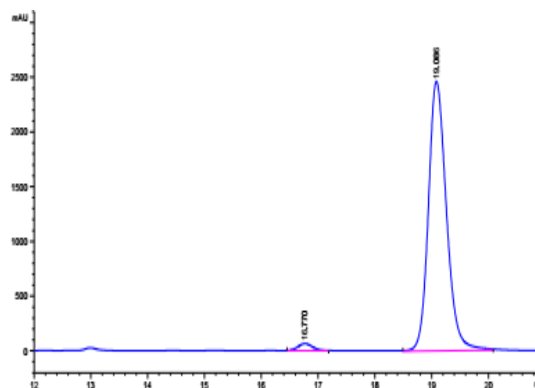

**Racemate:**

| Peak | PetTime | Type | Width(min) | Area(mAu*S) | Hight(mAu) | Area%   |
|------|---------|------|------------|-------------|------------|---------|
| 1    | 16.839  | MM R | 0.3126     | 1050.83105  | 53.66994   | 49.9367 |
| 2    | 19.271  | MM R | 0.3474     | 1053.49658  | 47.94884   | 50.0633 |

**Chiral sample:**

| Peak | PetTime | Type | Width(min) | Area(mAu*S) | Hight(mAu) | Area%   |
|------|---------|------|------------|-------------|------------|---------|
| 1    | 16.770  | MM R | 0.3122     | 1249.31238  | 66.69720   | 2.2474  |
| 2    | 19.086  | MM R | 0.3678     | 5.43397e4   | 2462.63647 | 97.7526 |

### HPLC chromatograph for compound 4n.

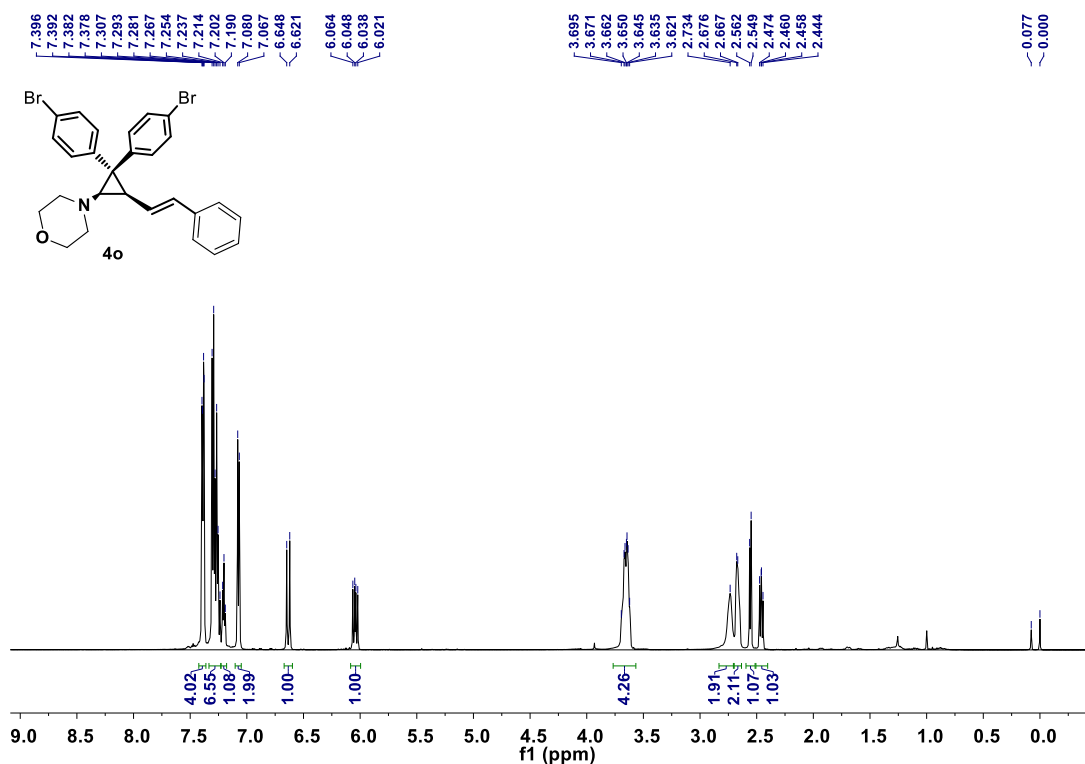

### <sup>1</sup>H NMR (600 MHz, CDCl<sub>3</sub>) spectrum for compound 4o.

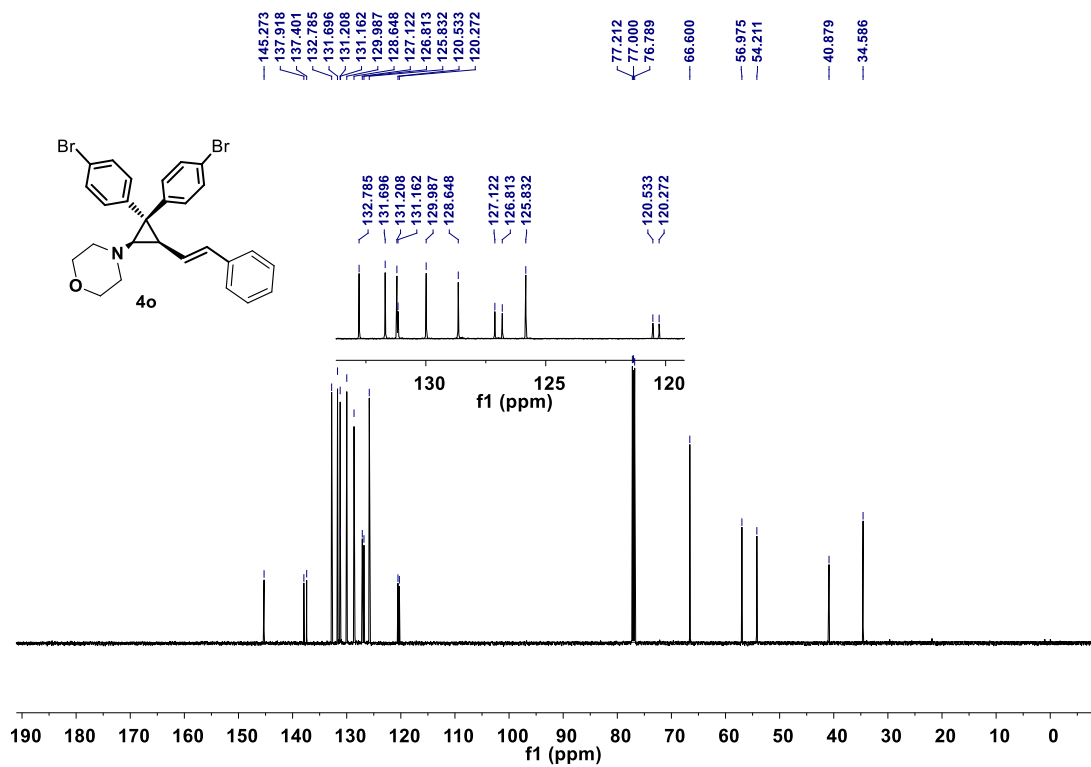

### <sup>13</sup>C NMR (150 MHz, CDCl<sub>3</sub>) spectrum for compound 4o.



**HPLC Conditions:** CHIRALCEL OD-H column, 95/5 hexanes/*i*-PrOH, 0.8 mL/min;  $t_R$  (major) = 13.6 min,  $t_R$  (minor) = 16.3 min.

**Racemate:**

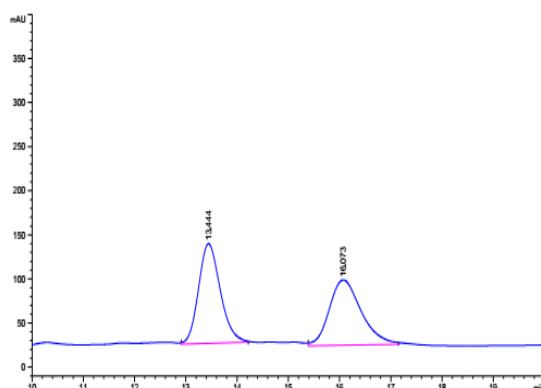

**Chiral sample:**

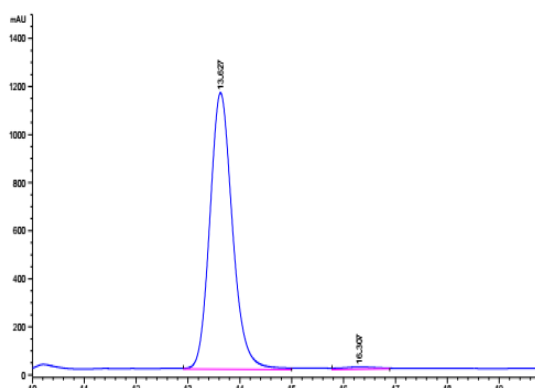

**Racemate:**

| Peak | PetTime | Type | Width(min) | Area(mAu*S) | Hight(mAu) | Area%   |
|------|---------|------|------------|-------------|------------|---------|
| 1    | 13.444  | MM R | 0.4916     | 3333.04590  | 113.00127  | 50.8959 |
| 2    | 16.073  | MM R | 0.7227     | 3215.70996  | 74.16123   | 49.1041 |

**Chiral sample:**

| Peak | PetTime | Type | Width(min) | Area(mAu*S) | Hight(mAu) | Area%   |
|------|---------|------|------------|-------------|------------|---------|
| 1    | 13.627  | MM R | 0.5053     | 3.48889e4   | 1150.79797 | 98.7873 |
| 2    | 16.307  | MM R | 0.7972     | 1797.38049  | 8.95439    | 1.2127  |

**HPLC chromatograph for compound 4o.**

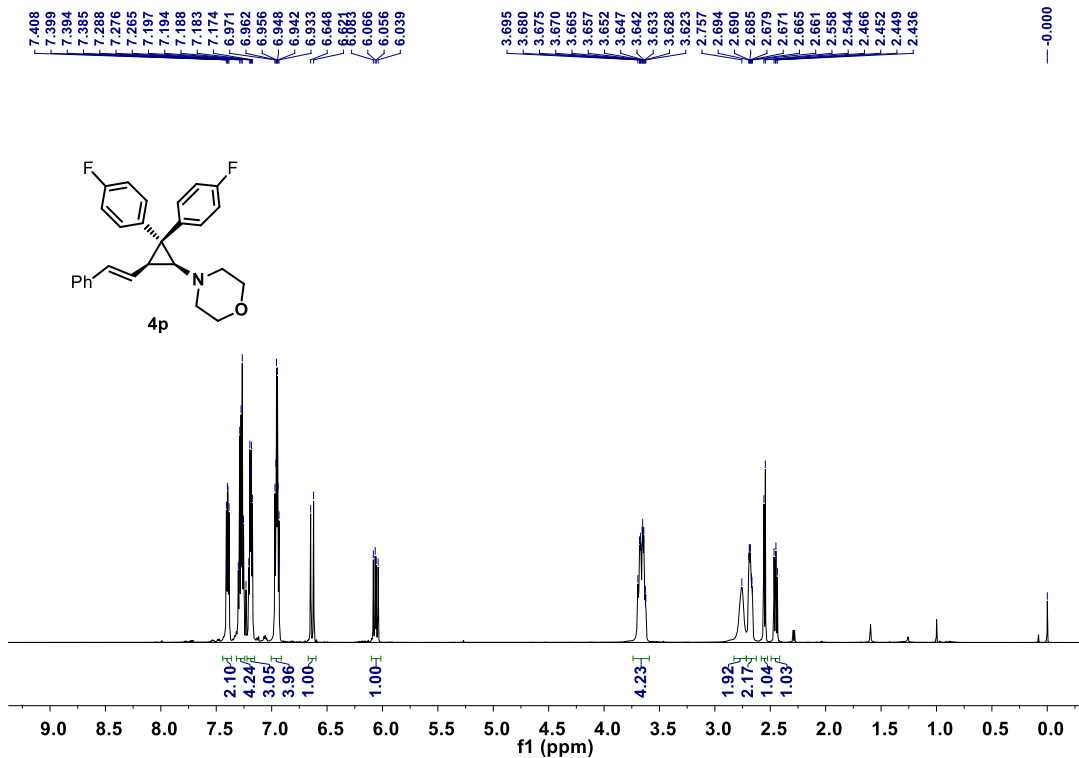

**$^1H$  NMR (600 MHz,  $CDCl_3$ ) spectrum for compound 4p.**

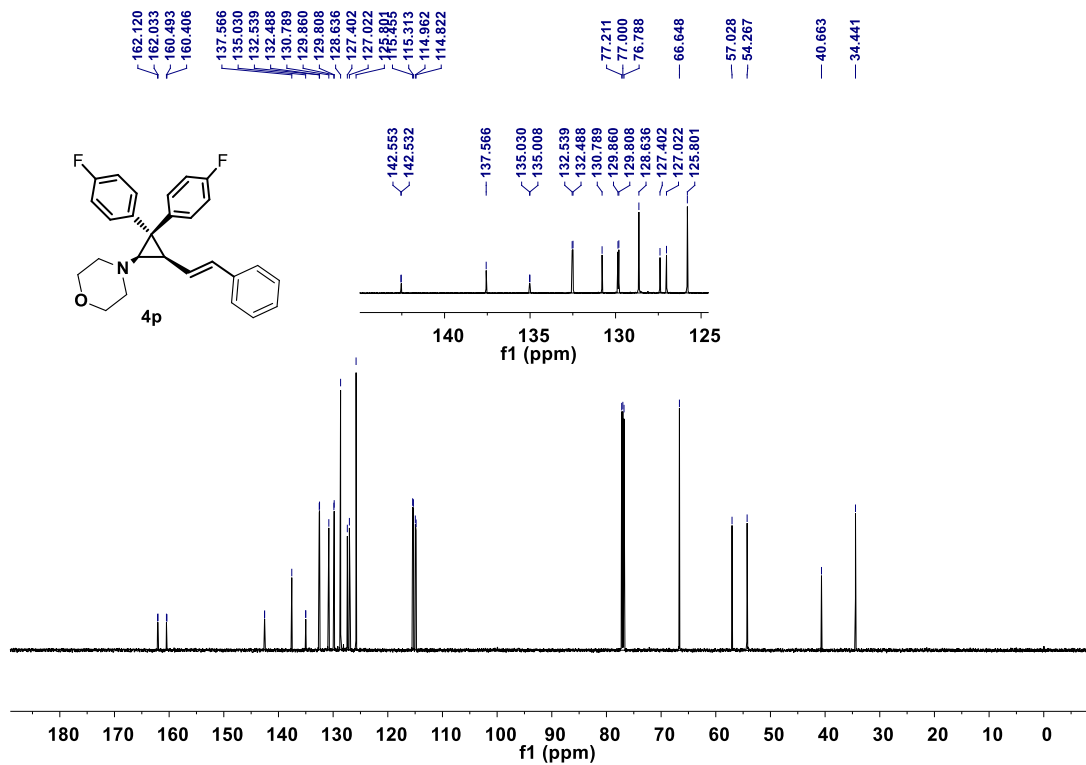

<sup>13</sup>C NMR (150 MHz, CDCl<sub>3</sub>) spectrum for compound 4p.

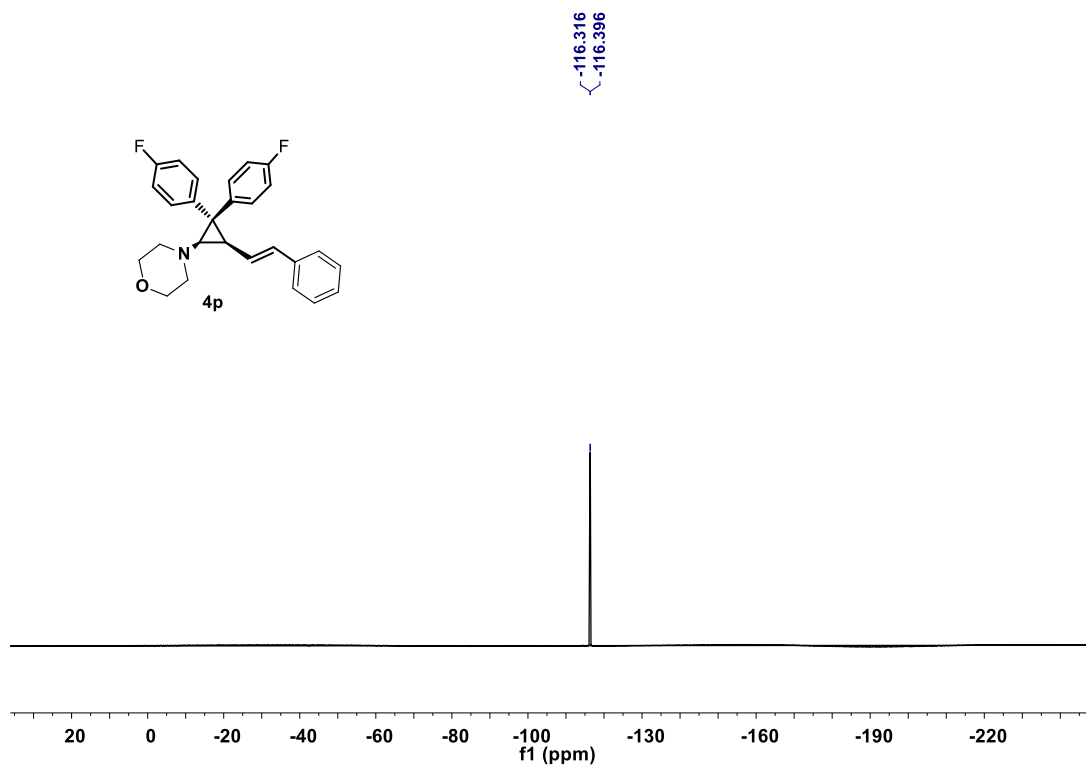

<sup>35</sup>F NMR (470 MHz, CDCl<sub>3</sub>) spectrum for compound 4p.

**HPLC Conditions:** CHIRALCEL IA column, 99/1 hexanes/*i*-PrOH, 0.8 mL/min;  $t_R$  (major) = 13.6 min,  $t_R$  (minor) = 12.3 min.

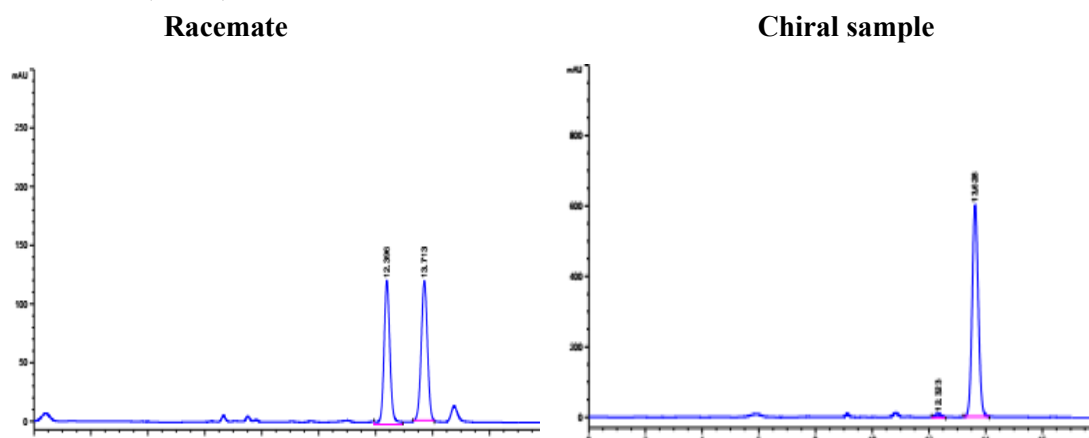

**Racemate:**

| Peak | PetTime | Type | Width(min) | Area(mAu*S) | Hight(mAu) | Area%   |
|------|---------|------|------------|-------------|------------|---------|
| 1    | 12.396  | MM R | 0.2423     | 1779.93347  | 122.41216  | 49.7561 |
| 2    | 13.713  | MM R | 0.2518     | 1797.38049  | 118.96817  | 50.2439 |

**Chiral sample:**

| Peak | PetTime | Type | Width(min) | Area(mAu*S) | Hight(mAu) | Area%   |
|------|---------|------|------------|-------------|------------|---------|
| 1    | 12.323  | MM R | 0.2580     | 161.13666   | 10.40926   | 1.7565  |
| 2    | 13.628  | MM R | 0.2503     | 9012.66113  | 600.23120  | 98.2435 |

**HPLC chromatograph for compound 4p.**

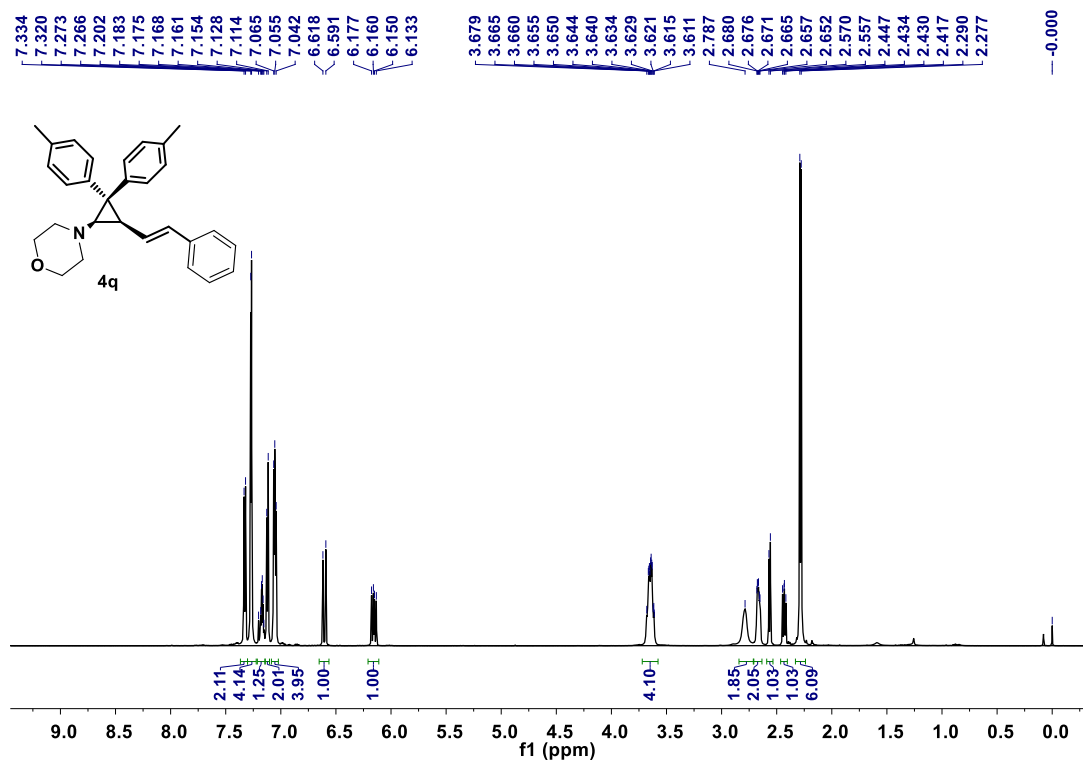

**<sup>1</sup>H NMR (600 MHz, CDCl<sub>3</sub>) spectrum for compound 4q.**



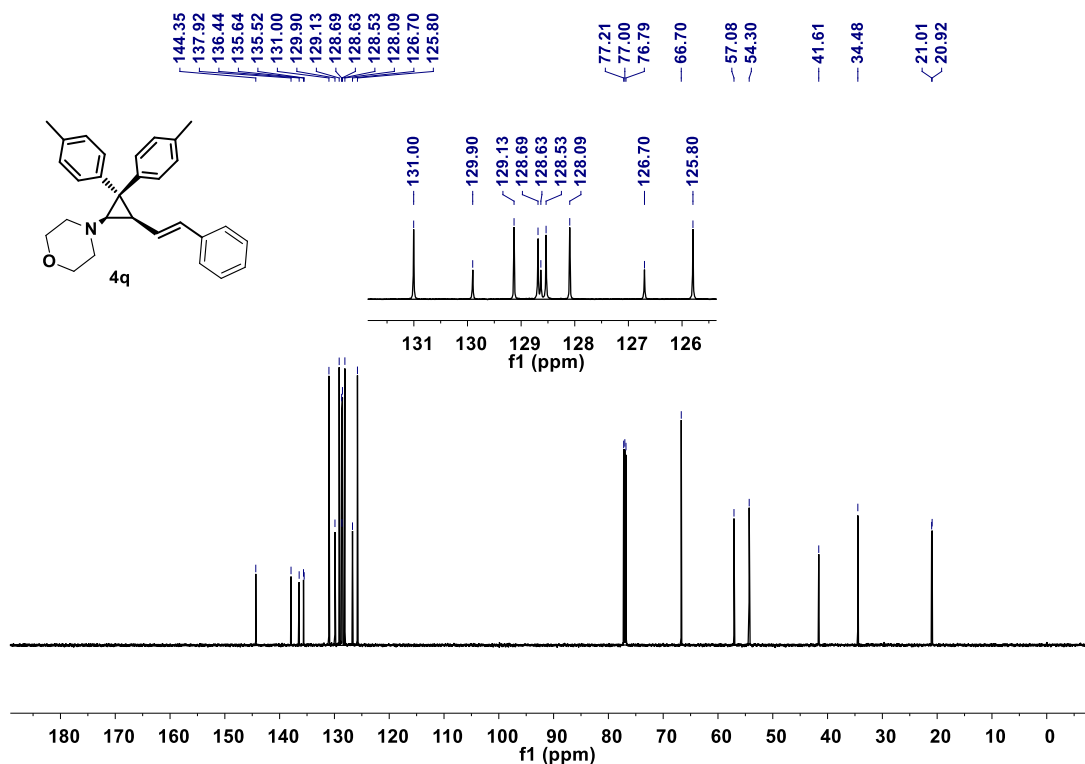

<sup>13</sup>C NMR (150 MHz, CDCl<sub>3</sub>) spectrum for compound 4q.

**HPLC Conditions:** CHIRALCEL IA column, 99/1 hexanes/*i*-PrOH, 0.8 mL/min;  $t_R$  (major) = 10.8 min,  $t_R$  (minor) = 9.7 min.

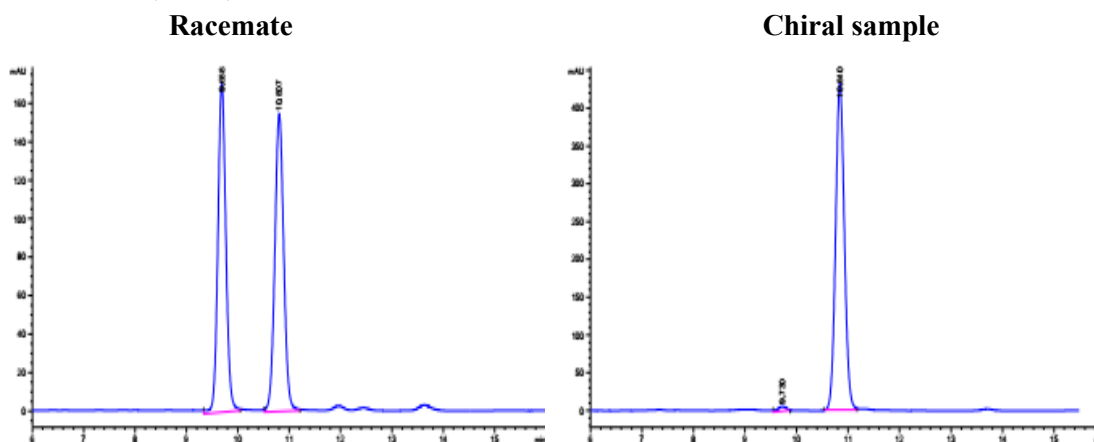

**Racemate:**

| Peak | PetTime | Type | Width(min) | Area(mAu*S) | Hight(mAu) | Area%   |
|------|---------|------|------------|-------------|------------|---------|
| 1    | 9.688   | MM R | 0.1798     | 1844.67175  | 170.99278  | 49.7647 |
| 2    | 10.807  | MM R | 0.2004     | 1862.11267  | 154.85078  | 50.2353 |

**Chiral sample:**

| Peak | PetTime | Type | Width(min) | Area(mAu*S) | Hight(mAu) | Area%   |
|------|---------|------|------------|-------------|------------|---------|
| 1    | 9.730   | MM R | 0.1869     | 67.55637    | 6.02589    | 1.3029  |
| 2    | 10.840  | MM R | 0.1971     | 5117.45605  | 432.73932  | 98.6971 |

**HPLC chromatograph for compound 4q.**

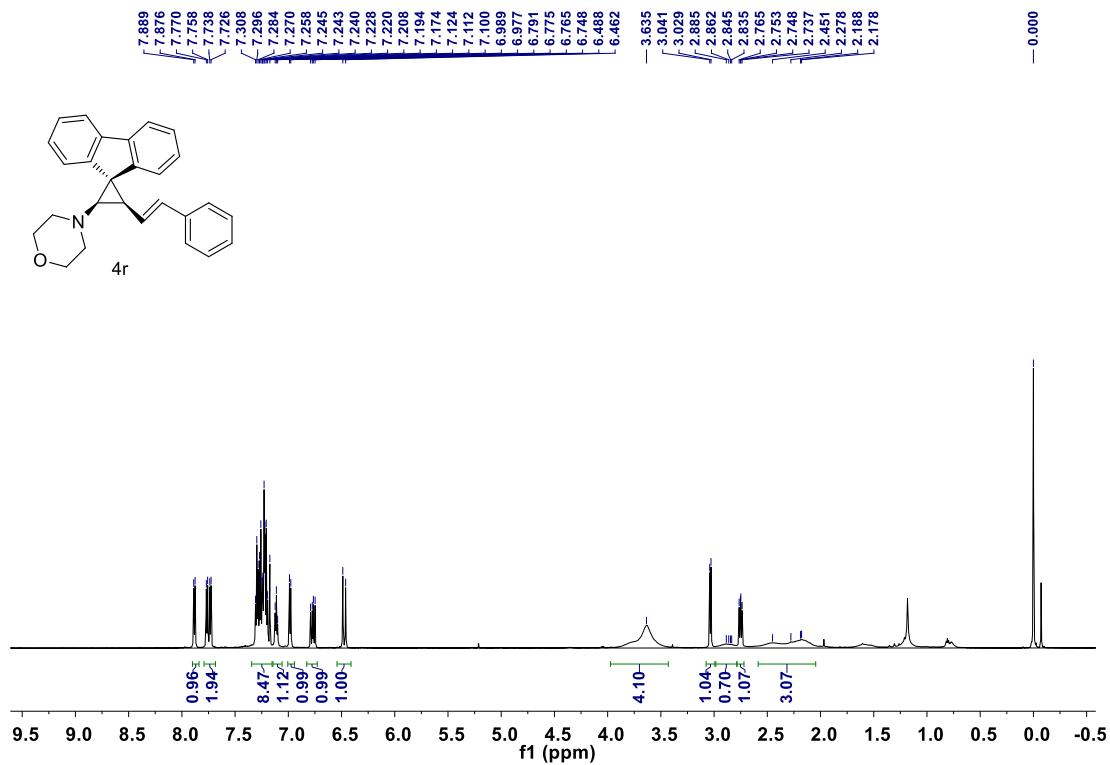

**<sup>1</sup>H NMR (600 MHz, CDCl<sub>3</sub>) spectrum for compound 4r.**

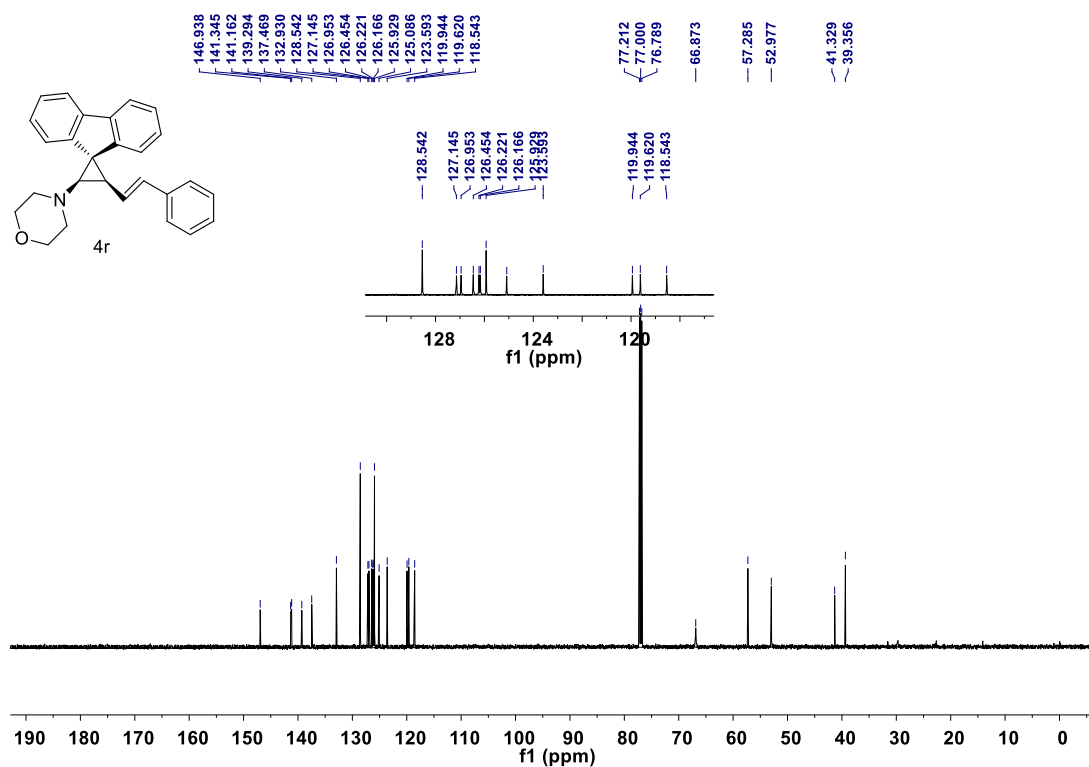

**<sup>13</sup>C NMR (150 MHz, CDCl<sub>3</sub>) spectrum for compound 4r.**

**HPLC Conditions:** CHIRALCEL AD column, 90/10 hexanes/*i*-PrOH, 0.6 mL/min;  $t_R$  (major) = 13.9 min,  $t_R$  (minor) = 11.6 min.

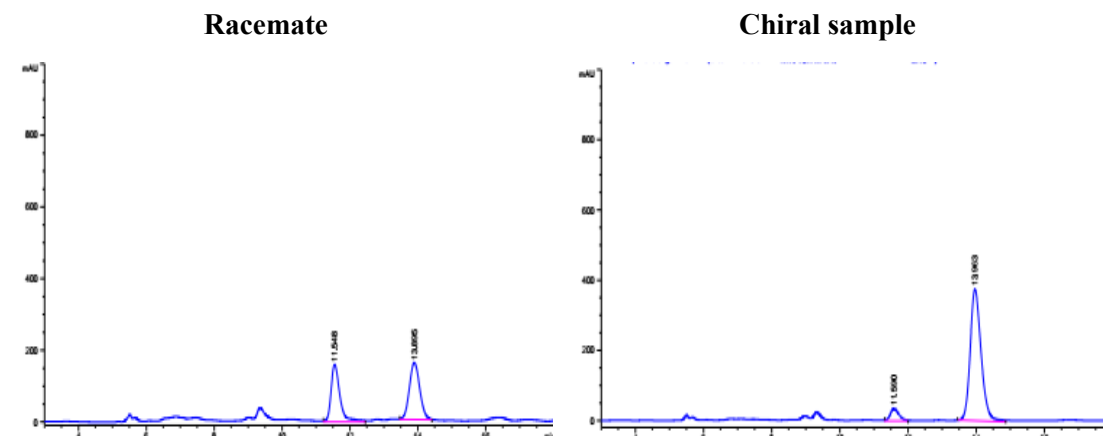

**Racemate:**

| Peak | PetTime | Type | Width(min) | Area(mAu*S) | Hight(mAu) | Area%   |
|------|---------|------|------------|-------------|------------|---------|
| 1    | 11.548  | MM R | 0.3059     | 2940.49561  | 160.22668  | 46.6153 |
| 2    | 13.895  | MM R | 0.3534     | 3367.50708  | 158.79982  | 53.3847 |

**Chiral sample:**

| Peak | PetTime | Type | Width(min) | Area(mAu*S) | Hight(mAu) | Area%   |
|------|---------|------|------------|-------------|------------|---------|
| 1    | 11.590  | MM R | 0.2982     | 628.72272   | 35.13592   | 7.0017  |
| 2    | 13.963  | MM R | 0.3719     | 8350.79102  | 374.27652  | 92.9983 |

**HPLC chromatograph for compound 4r.**

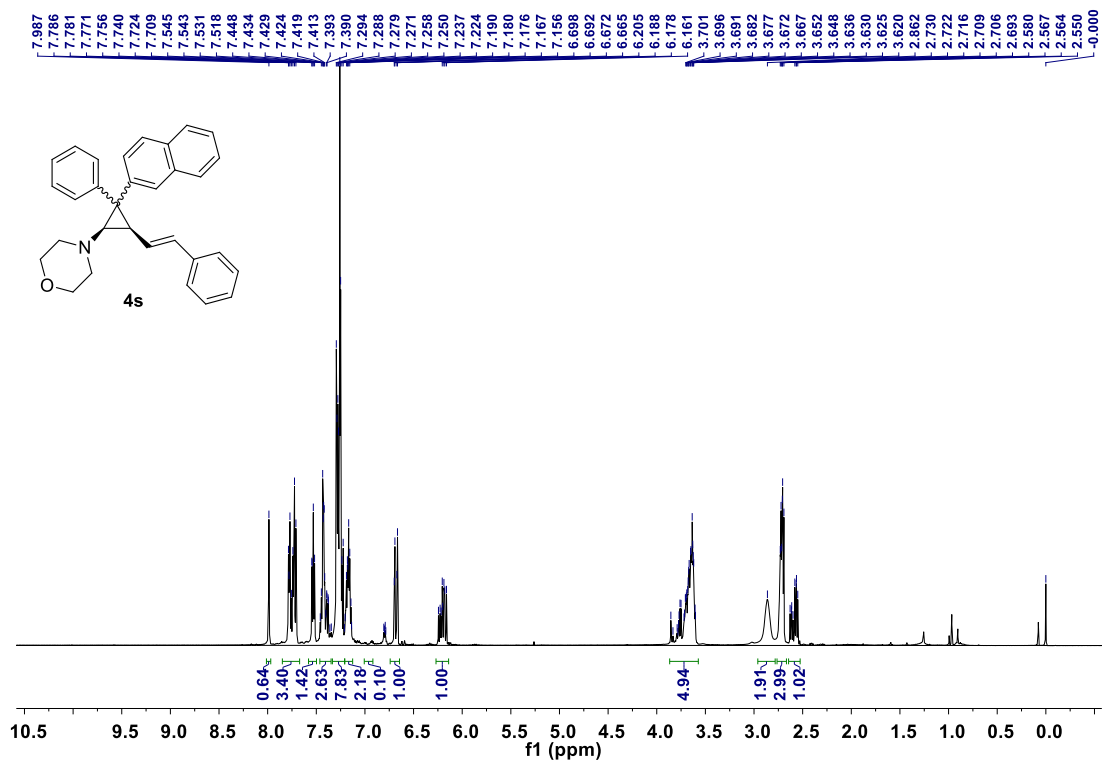

**$^1H$  NMR (600 MHz,  $CDCl_3$ ) spectrum for compound 4s.**

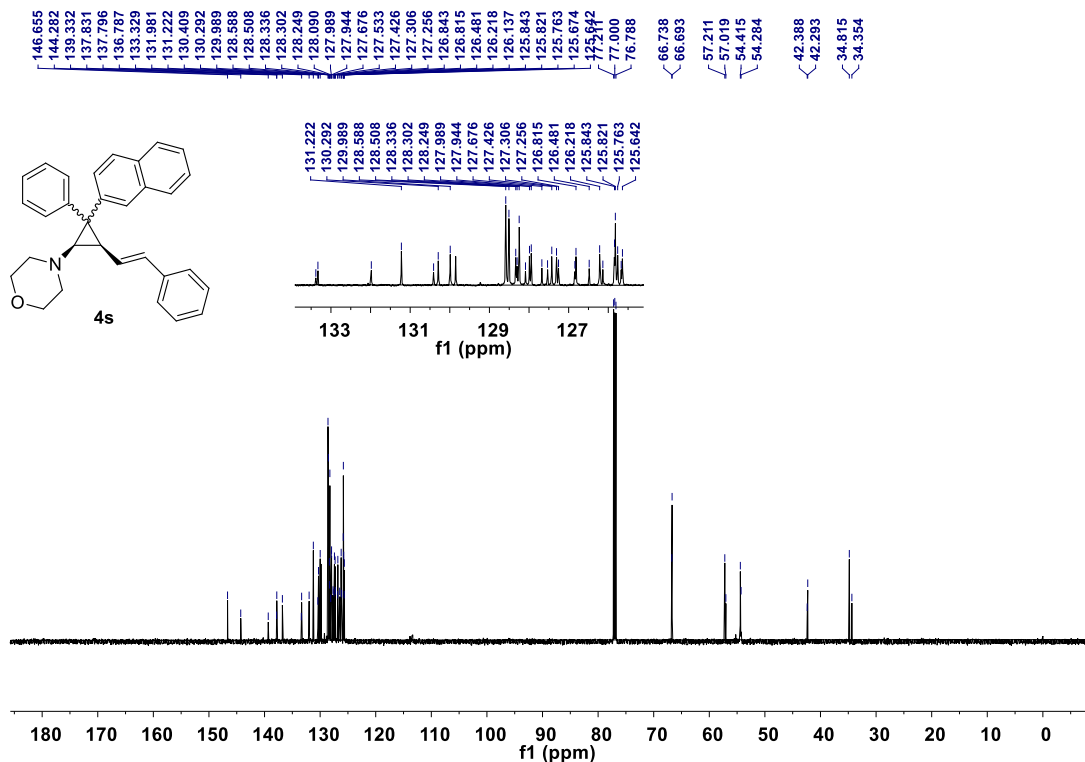

<sup>13</sup>C NMR (150 MHz, CDCl<sub>3</sub>) spectrum for compound 4s.

HPLC Conditions: CHIRALCEL IA column, 99/1 hexanes/*i*-PrOH, 0.8 mL/min; *t<sub>R</sub>* (major) = 12.3, 20.4 min, *t<sub>R</sub>* (minor) = 11.1, 11.6 min.

Racemate:

Chiral sample:

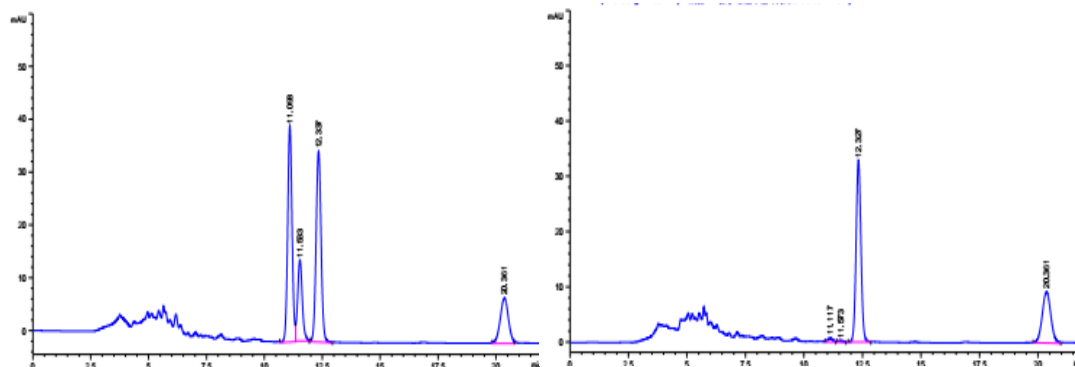

Racemate:

| Peak | PetTime | Type | Width(min) | Area(mAu*S) | Hight(mAu) | Area%   |
|------|---------|------|------------|-------------|------------|---------|
| 1    | 11.098  | MM R | 0.2198     | 540.20190   | 40.96717   | 35.9351 |
| 2    | 11.533  | MM R | 0.2306     | 212.11006   | 15.32844   | 14.1099 |
| 3    | 12.337  | MM R | 0.2484     | 538.5626    | 36.13845   | 35.8261 |
| 4    | 20.361  | MM R | 0.4108     | 212.39522   | 8.61811    | 14.1289 |

Chiral sample:

| Peak | PetTime | Type | Width(min) | Area(mAu*S) | Hight(mAu) | Area%   |
|------|---------|------|------------|-------------|------------|---------|
| 1    | 11.117  | MM R | 0.2419     | 10.22579    | 7.04544e-1 | 1.4115  |
| 2    | 11.573  | MM R | 0.2569     | 5.18444     | 3.36375e-1 | 0.7156  |
| 3    | 12.327  | MM R | 0.2393     | 472.97668   | 32.94346   | 65.2856 |
| 4    | 20.361  | MM R | 0.4235     | 236.08577   | 9.29155    | 32.5873 |

HPLC chromatograph for compound 4s.

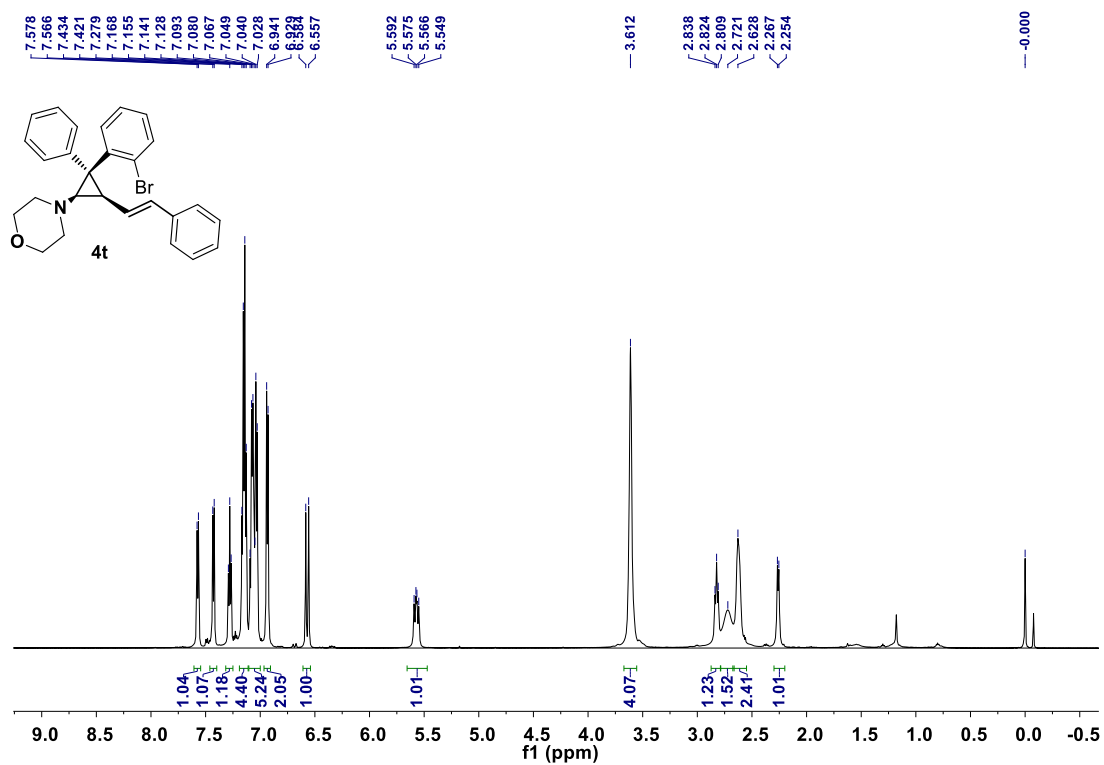

**<sup>1</sup>H NMR (600 MHz, CDCl<sub>3</sub>) spectrum for compound 4t.**

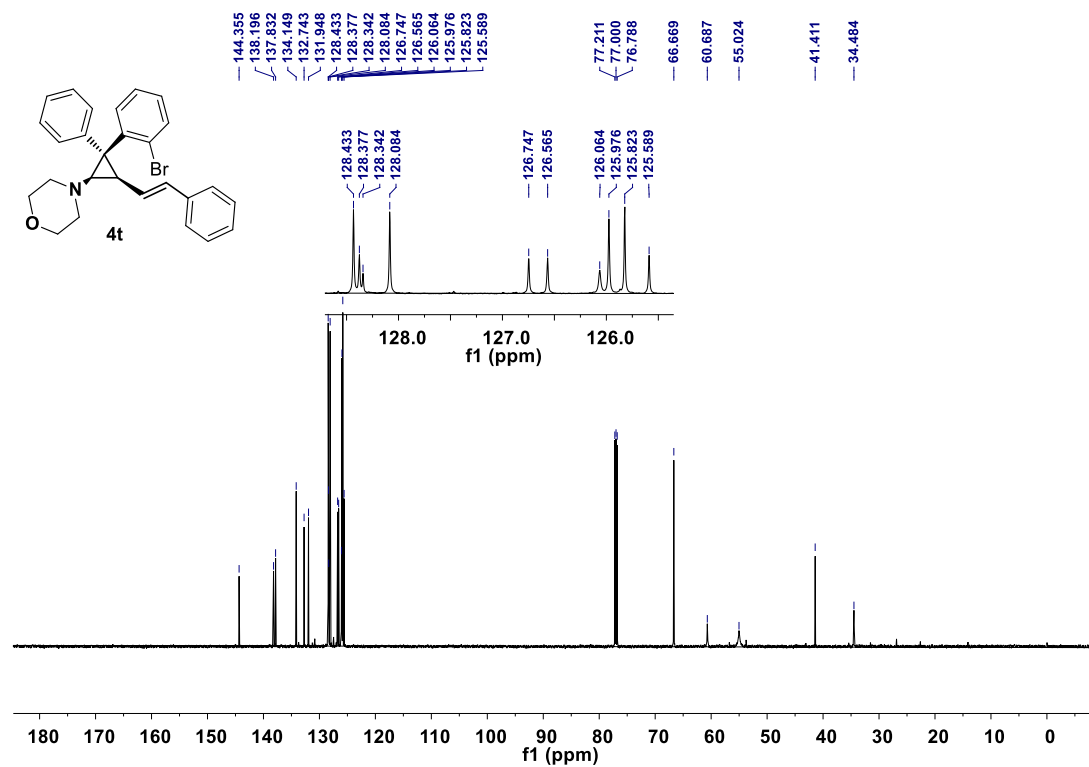

**<sup>13</sup>C NMR (150 MHz, CDCl<sub>3</sub>) spectrum for compound 4t.**

**HPLC Conditions:** CHIRALCEL IA column, 98/2 hexanes/*i*-PrOH, 0.4 mL/min;  $t_R$  (major) = 15.9 min,  $t_R$  (minor) = 16.9 min.

**Racemate:**

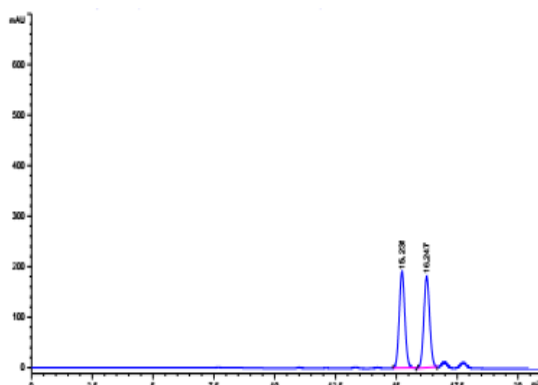

**Chiral sample:**

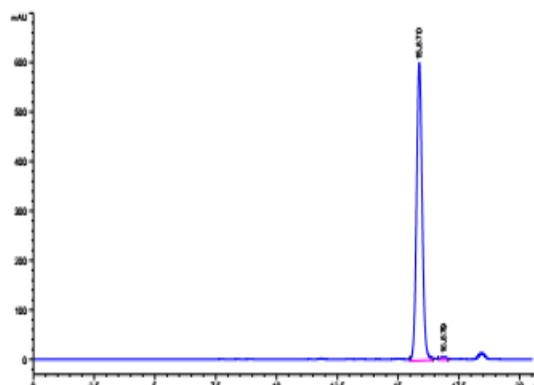

**Racemate:**

| Peak | PetTime | Type | Width(min) | Area(mAu*S) | Hight(mAu) | Area%   |
|------|---------|------|------------|-------------|------------|---------|
| 1    | 15.231  | MM R | 0.2680     | 3058.31714  | 190.17407  | 50.3303 |
| 2    | 16.247  | MM R | 0.2795     | 3018.16992  | 179.97801  | 49.6697 |

**Chiral sample:**

| Peak | PetTime | Type | Width(min) | Area(mAu*S) | Hight(mAu) | Area%   |
|------|---------|------|------------|-------------|------------|---------|
| 1    | 15.870  | MM R | 0.2695     | 9725.69238  | 601.51691  | 99.1298 |
| 2    | 16.879  | MM R | 0.2981     | 85.37263    | 4.77350    | 0.8702  |

**HPLC chromatograph for compound 4t.**

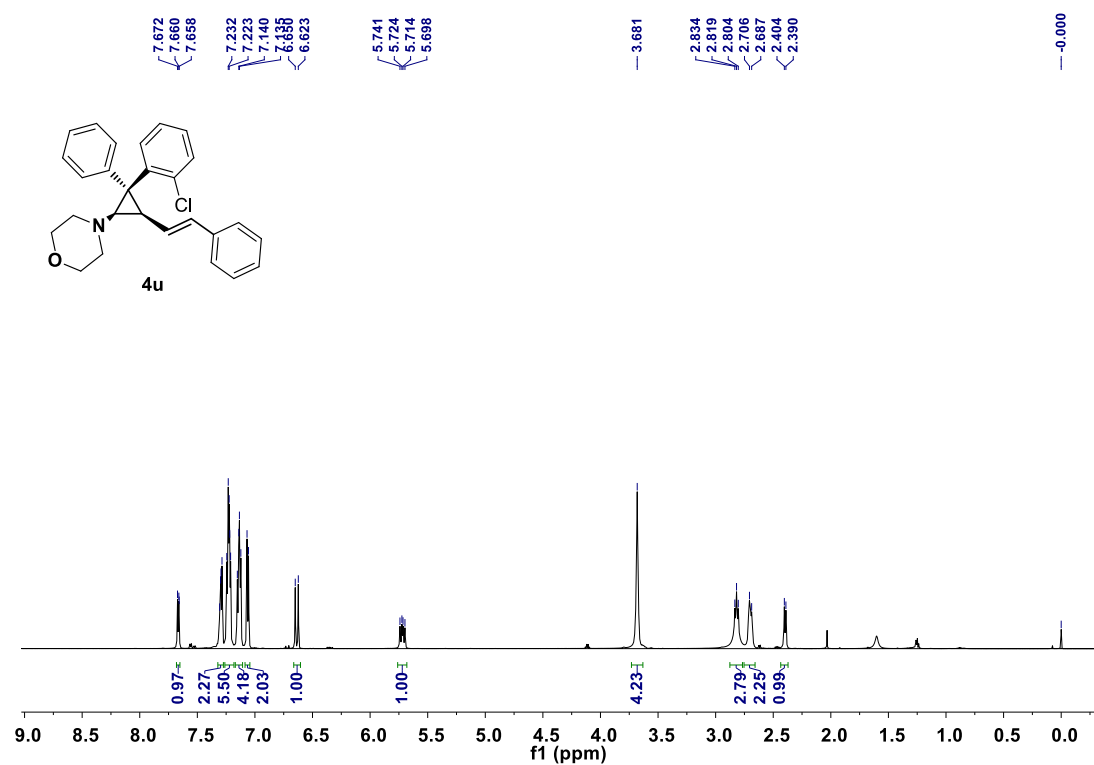

**<sup>1</sup>H NMR (600 MHz, CDCl<sub>3</sub>) spectrum for compound 4u.**

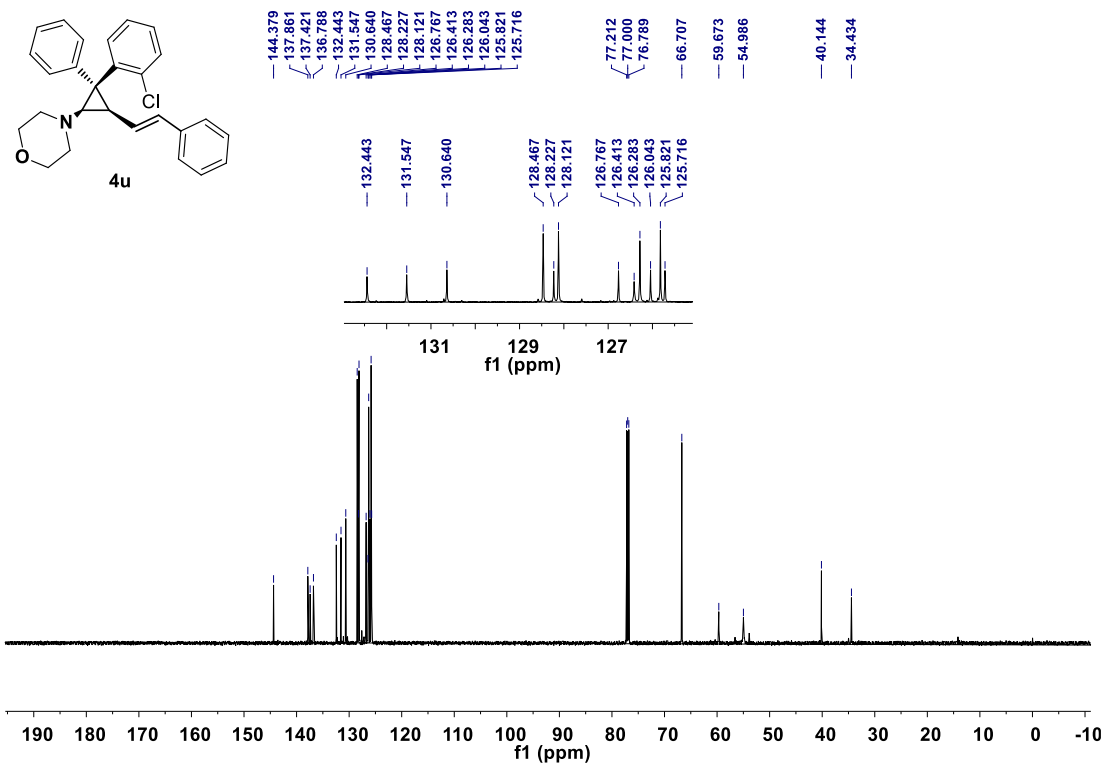

<sup>13</sup>C NMR (150 MHz, CDCl<sub>3</sub>) spectrum for compound 4u.

**HPLC Conditions:** CHIRALCEL IC column, 96/4 hexanes/*i*-PrOH, 0.6 mL/min; *t<sub>R</sub>* (major) = 10.1 min, *t<sub>R</sub>* (minor) = 12.1 min.

**Racemate:**

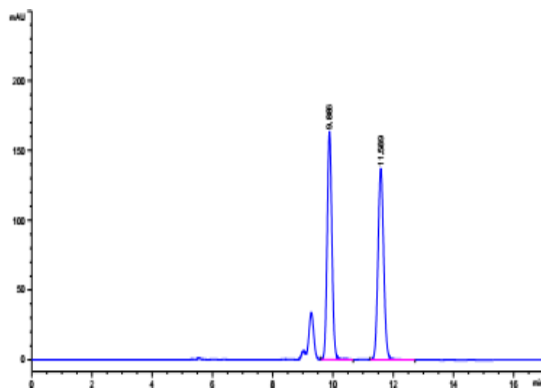

**Chiral sample:**

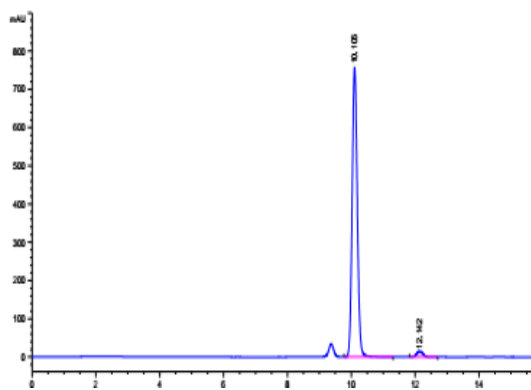

**Racemate:**

| Peak | PetTime | Type | Width(min) | Area(mAu*S) | Hight(mAu) | Area%   |
|------|---------|------|------------|-------------|------------|---------|
| 1    | 9.886   | MM R | 0.1700     | 1791.94263  | 163.33707  | 49.9785 |
| 2    | 11.589  | MM R | 0.2037     | 1793.48621  | 137.04314  | 50.0215 |

**Chiral sample:**

| Peak | PetTime | Type | Width(min) | Area(mAu*S) | Hight(mAu) | Area%   |
|------|---------|------|------------|-------------|------------|---------|
| 1    | 10.105  | MM R | 0.1730     | 8455.79688  | 758.98486  | 97.6711 |
| 2    | 12.142  | MM R | 0.2119     | 201.62250   | 14.80193   | 2.3289  |

**HPLC chromatograph for compound 4u.**

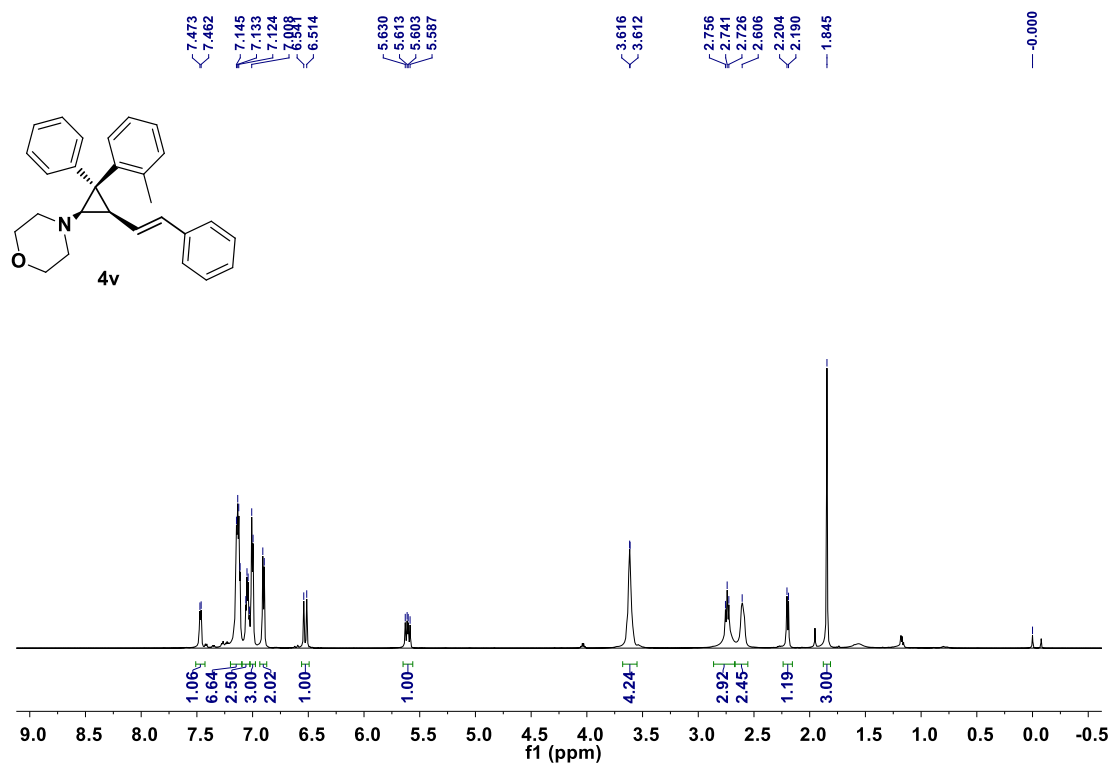

**<sup>1</sup>H NMR (600 MHz, CDCl<sub>3</sub>) spectrum for compound 4v.**

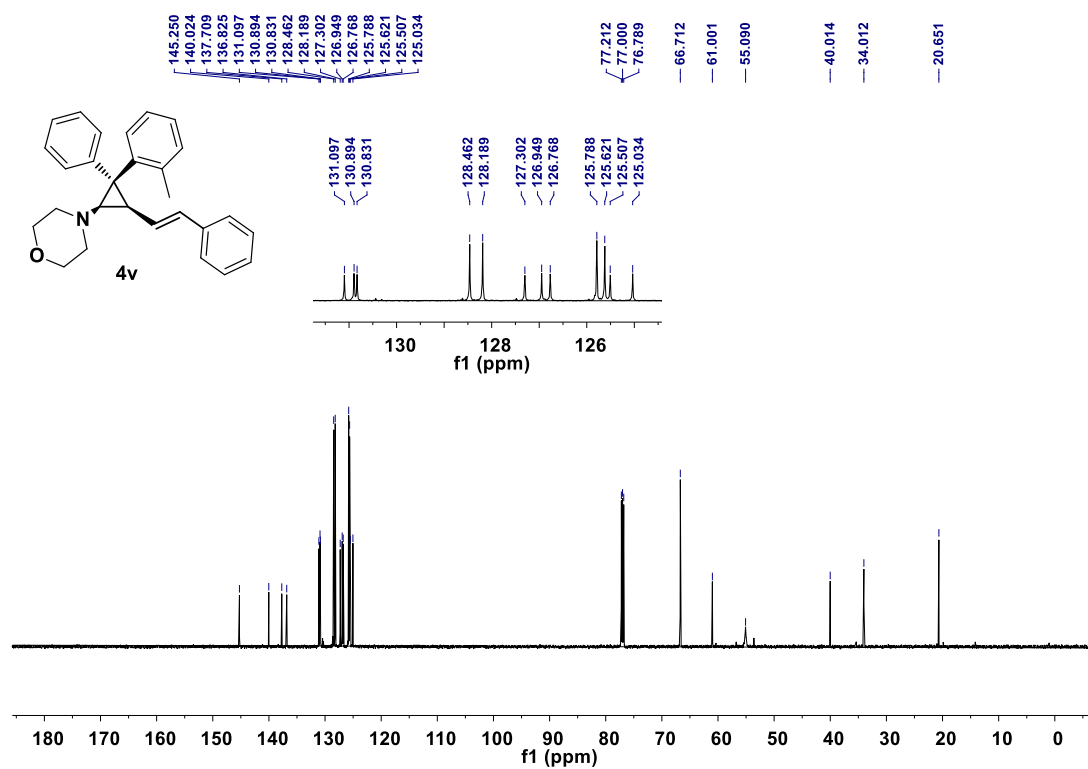

**<sup>13</sup>C NMR (150 MHz, CDCl<sub>3</sub>) spectrum for compound 4v.**



**HPLC Conditions:** CHIRALCEL IC column, 96/4 hexanes/*i*-PrOH, 0.6 mL/min;  $t_R$  (major) = 9.2 min,  $t_R$  (minor) = 10.9 min.

**Racemate:**

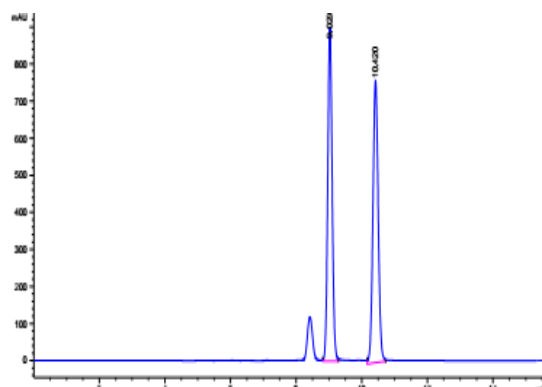

**Chiral sample:**

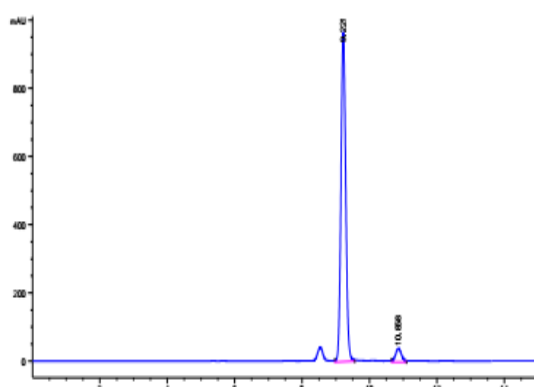

**Racemate:**

| Peak | PetTime | Type | Width(min) | Area(mAu*S) | Hight(mAu) | Area%   |
|------|---------|------|------------|-------------|------------|---------|
| 1    | 9.029   | MM R | 0.1562     | 8407.25195  | 897.14618  | 49.8720 |
| 2    | 10.420  | MM R | 0.1853     | 8450.40918  | 760.22675  | 50.1208 |

**Chiral sample:**

| Peak | PetTime | Type | Width(min) | Area(mAu*S) | Hight(mAu) | Area%   |
|------|---------|------|------------|-------------|------------|---------|
| 1    | 9.221   | MM R | 0.1638     | 9490.77344  | 965.53564  | 94.9880 |
| 2    | 10.858  | MM R | 0.2102     | 500.77646   | 39.71390   | 5.0120  |

**HPLC chromatograph for compound 4v.**

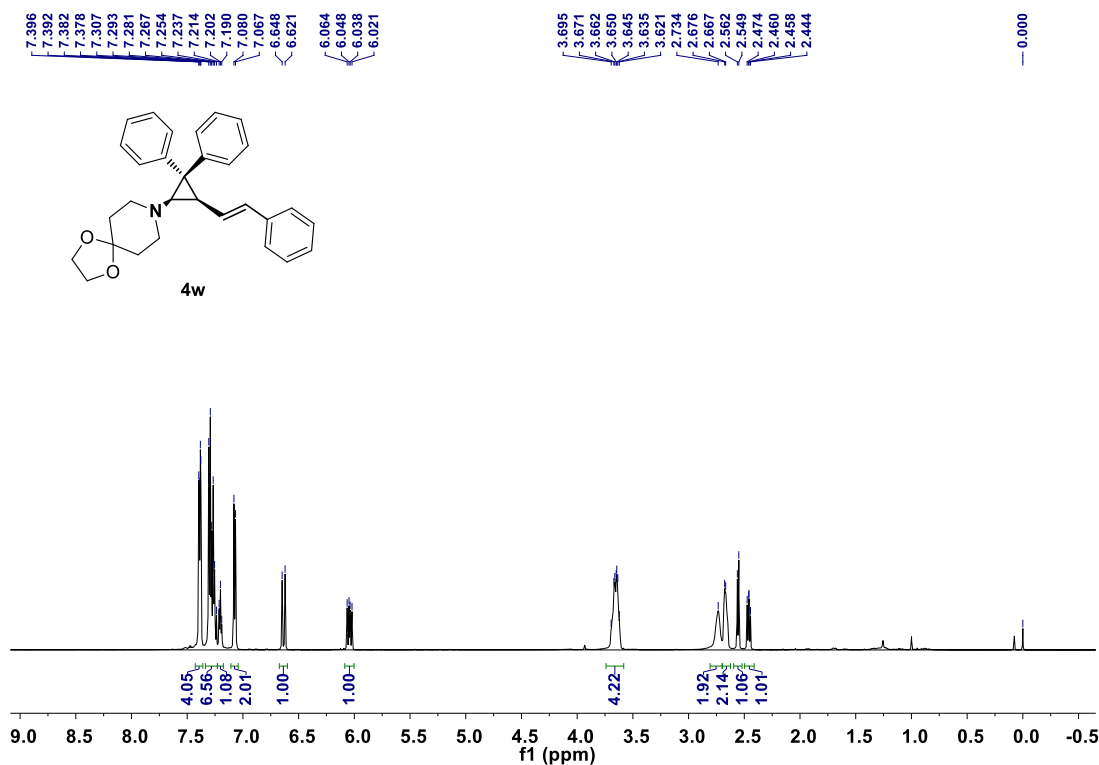

**<sup>1</sup>H NMR (600 MHz, CDCl<sub>3</sub>) spectrum for compound 4w.**

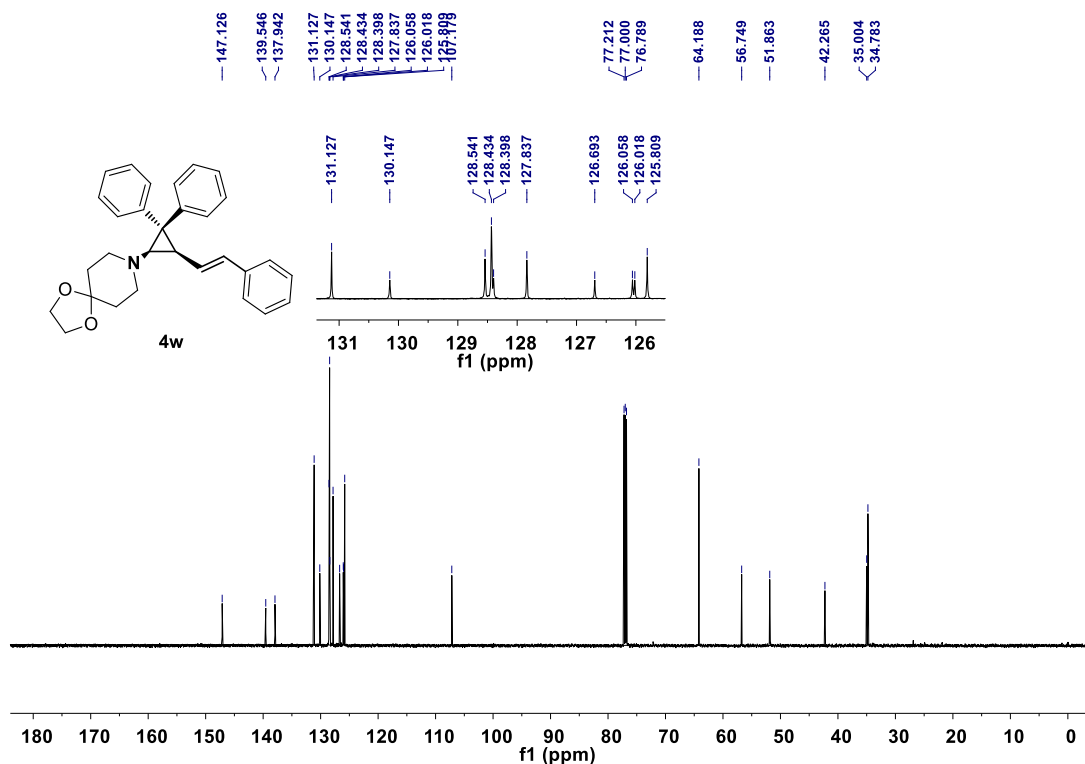

<sup>13</sup>C NMR (150 MHz, CDCl<sub>3</sub>) spectrum for compound 4w.

**HPLC Conditions:** CHIRALCEL OD-H column, 95/5 hexanes/*i*-PrOH, 0.8 mL/min;  $t_R$  (major) = 10.2 min,  $t_R$  (minor) = 7.4 min.

**Racemate:**

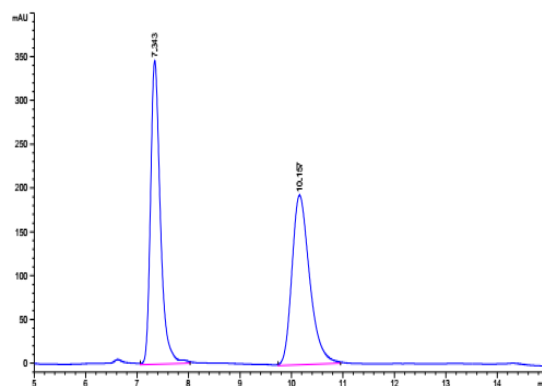

**Chiral sample:**

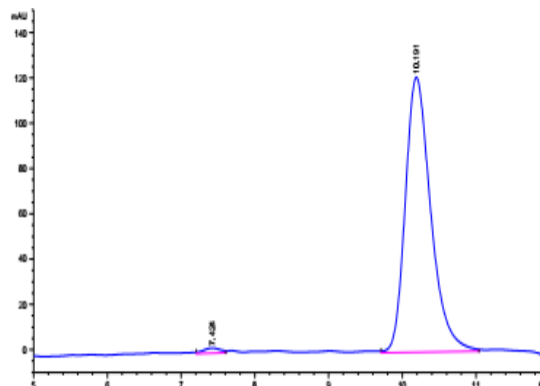

**Racemate:**

| Peak | PetTime | Type | Width(min) | Area(mAu*S) | Hight(mAu) | Area%   |
|------|---------|------|------------|-------------|------------|---------|
| 1    | 7.343   | MM R | 0.2203     | 4587.25879  | 346.96991  | 49.7501 |
| 2    | 10.157  | MM R | 0.3989     | 4633.33643  | 193.58546  | 50.2499 |

**Chiral sample:**

| Peak | PetTime | Type | Width(min) | Area(mAu*S) | Hight(mAu) | Area%   |
|------|---------|------|------------|-------------|------------|---------|
| 1    | 7.424   | MM R | 0.2717     | 37.44458    | 2.29654    | 1.2666  |
| 2    | 10.191  | MM R | 0.4007     | 2918.97290  | 121.42398  | 98.7334 |

**HPLC chromatograph for compound 4w.**

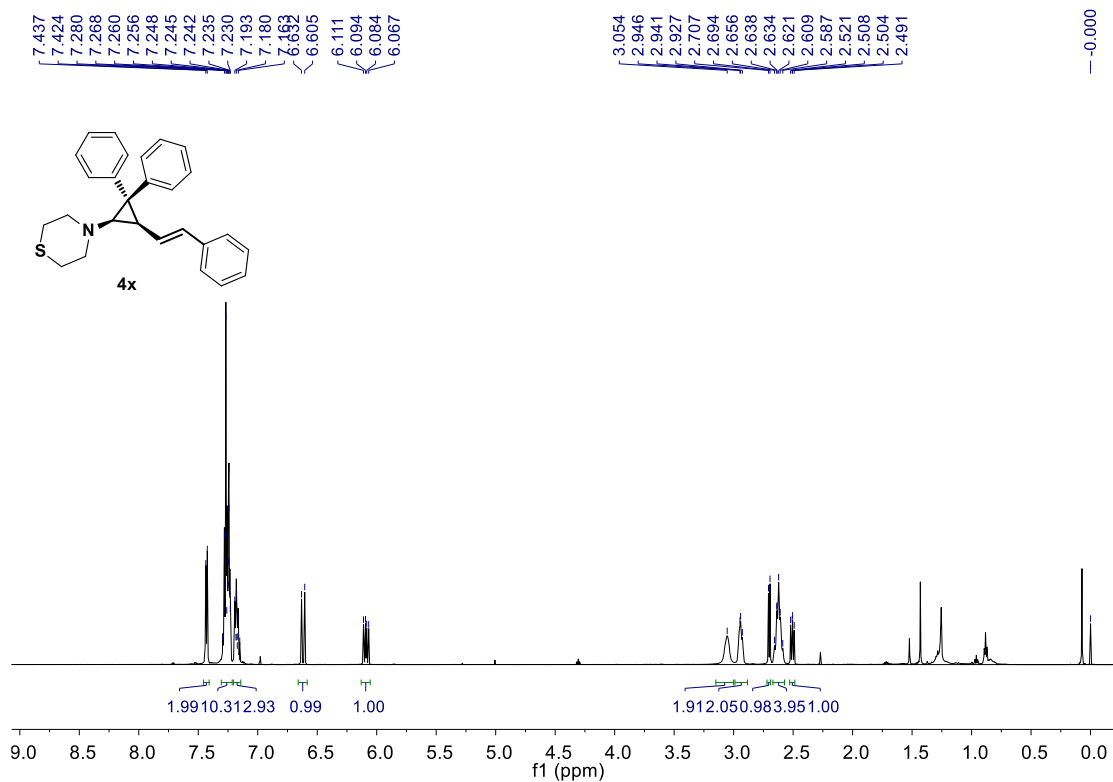

**<sup>1</sup>H NMR (600 MHz, CDCl<sub>3</sub>) spectrum for compound 4x.**

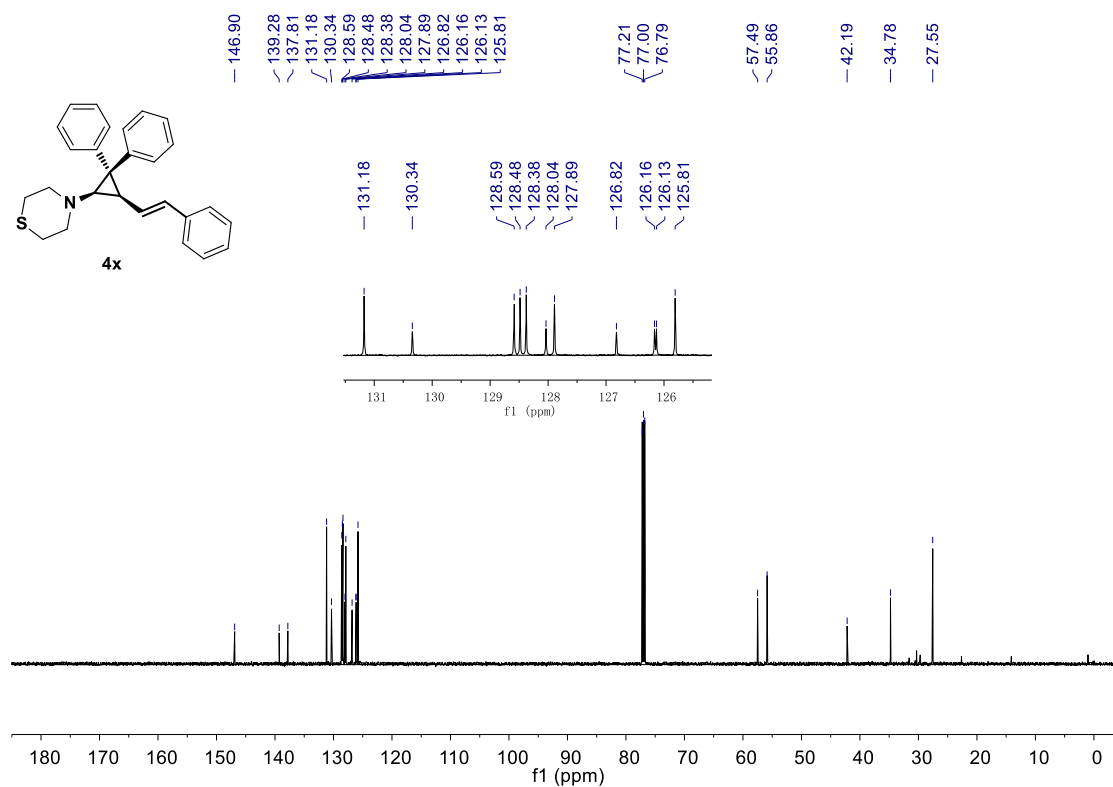

**<sup>13</sup>C NMR (150 MHz, CDCl<sub>3</sub>) spectrum for compound 4x.**

**HPLC Conditions:** CHIRALCEL IA-H column, 95/5 hexanes/*i*-PrOH, 0.5 mL/min;  $t_R$  (major) = 11.5 min,  $t_R$  (minor) = 9.3 min.

**Racemate:**

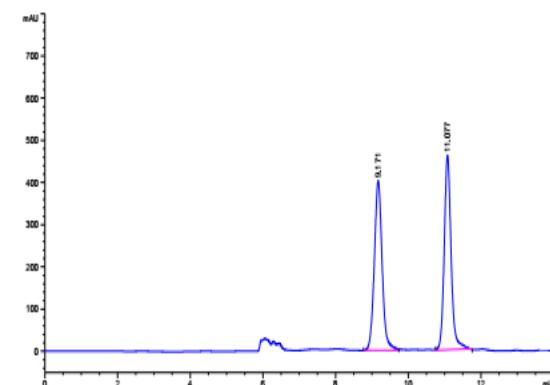

**Chiral sample:**

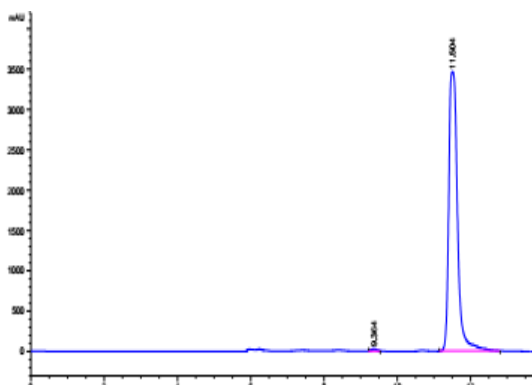

**Racemate:**

| Peak | PetTime | Type | Width(min) | Area(mAu*S) | Hight(mAu) | Area%   |
|------|---------|------|------------|-------------|------------|---------|
| 1    | 9.171   | MM R | 0.2473     | 5958.70215  | 401.55231  | 49.6764 |
| 2    | 11.077  | MM R | 0.2185     | 6036.33447  | 460.43890  | 50.3236 |

**Chiral sample:**

| Peak | PetTime | Type | Width(min) | Area(mAu*S) | Hight(mAu) | Area%   |
|------|---------|------|------------|-------------|------------|---------|
| 1    | 9.346   | MM R | 0.1767     | 28.14752    | 28.14752   | 0.5201  |
| 2    | 11.504  | MM R | 0.2729     | 5.70655e4   | 3456.61133 | 99.4799 |

**HPLC chromatograph for compound 4x.**

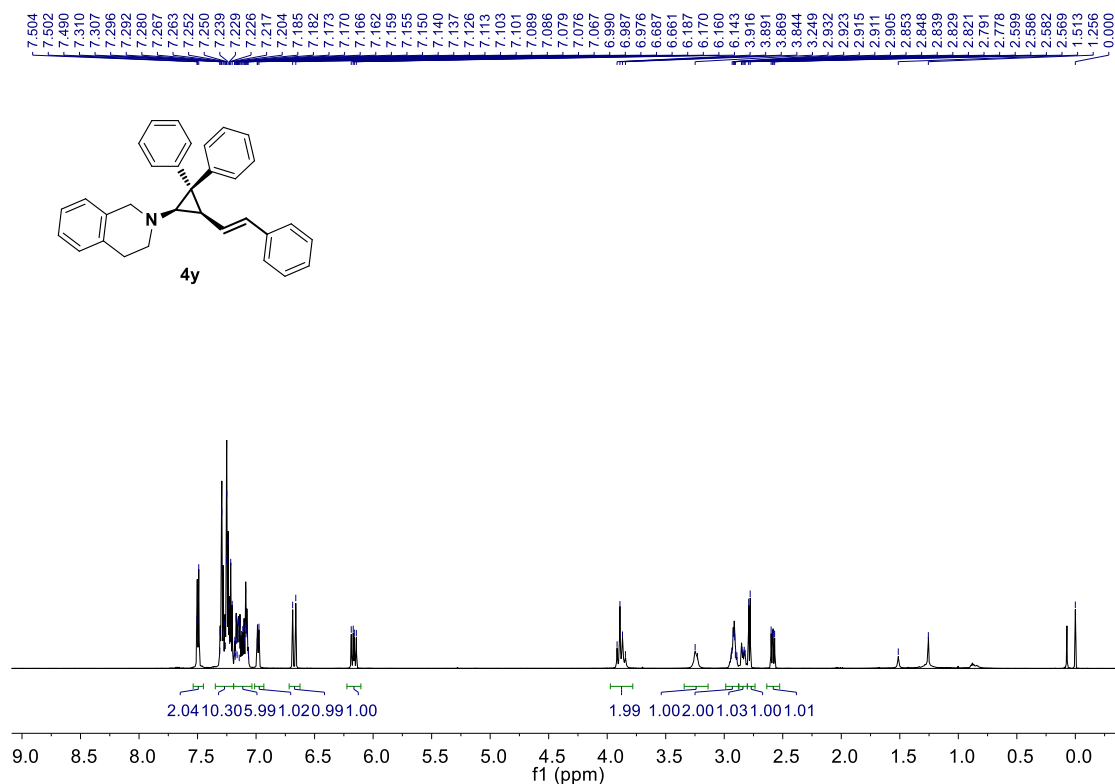

**$^1\text{H}$  NMR (600 MHz,  $\text{CDCl}_3$ ) spectrum for compound 4y.**

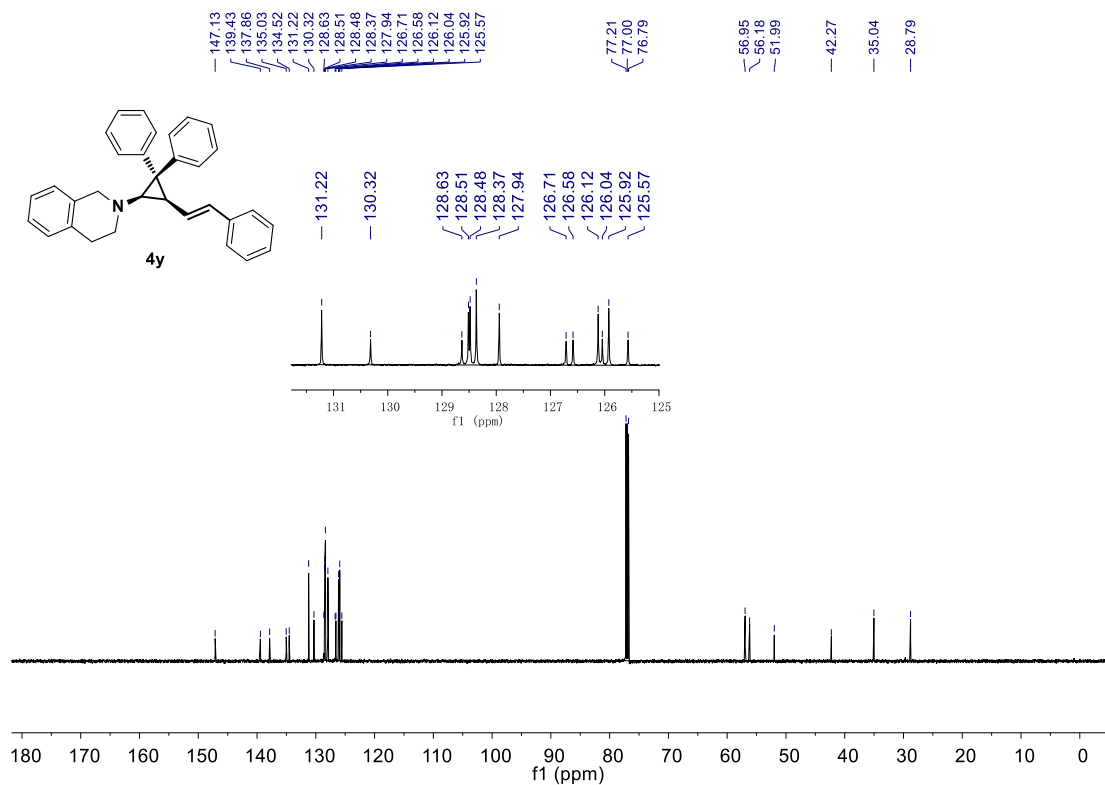

**<sup>13</sup>C NMR (150 MHz, CDCl<sub>3</sub>) spectrum for compound 4y.**

**HPLC Conditions:** CHIRALCEL AD-H column, 98/2 hexanes/*i*-PrOH, 0.4 mL/min; *t<sub>R</sub>* (major) = 12.6 min, *t<sub>R</sub>* (minor) = 11.9 min.

**Racemate:**

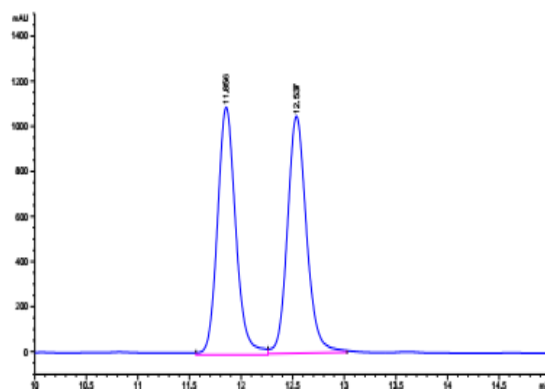

**Chiral sample:**

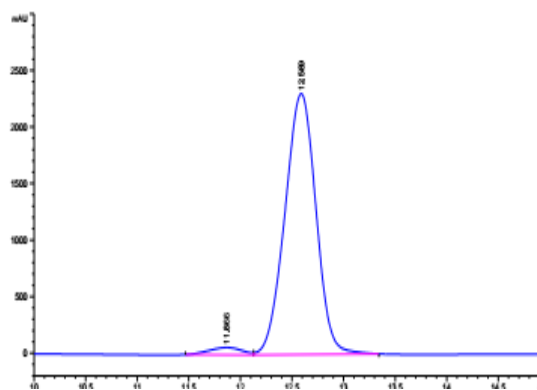

**Racemate:**

| Peak | PetTime | Type | Width (min) | Area (mAu*S) | Hight (mAu) | Area%   |
|------|---------|------|-------------|--------------|-------------|---------|
| 1    | 11.856  | MM R | 0.2056      | 1.35476e4    | 1098.26343  | 49.6764 |
| 2    | 12.537  | MM R | 0.1957      | 1.35435e4    | 1052.28235  | 50.3236 |

**Chiral sample:**

| Peak | PetTime | Type | Width(min) | Area(mAu*S) | Hight(mAu) | Area%   |
|------|---------|------|------------|-------------|------------|---------|
| 1    | 11.866  | MM R | 0.3709     | 1436.27441  | 64.54604   | 2.8845  |
| 2    | 12.589  | MM R | 0.3299     | 4.83562e4   | 2306.66138 | 97.1155 |

**HPLC chromatograph for compound 4y.**

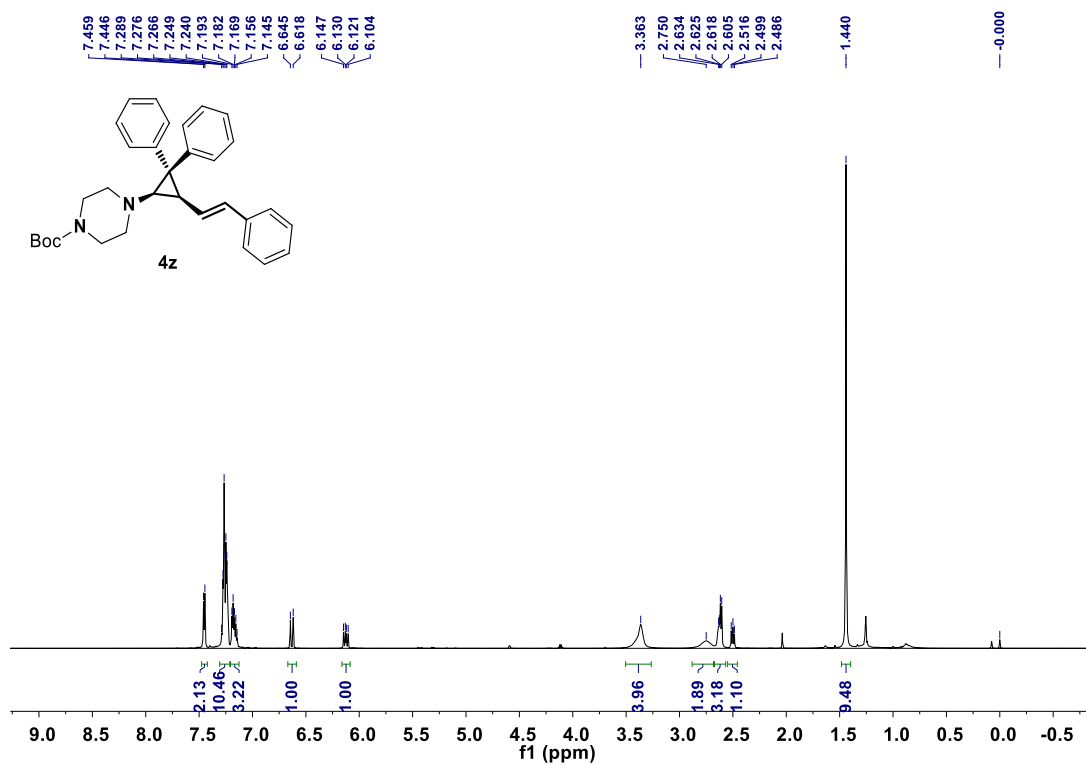

**<sup>1</sup>H NMR (600 MHz, CDCl<sub>3</sub>) spectrum for compound 4z.**

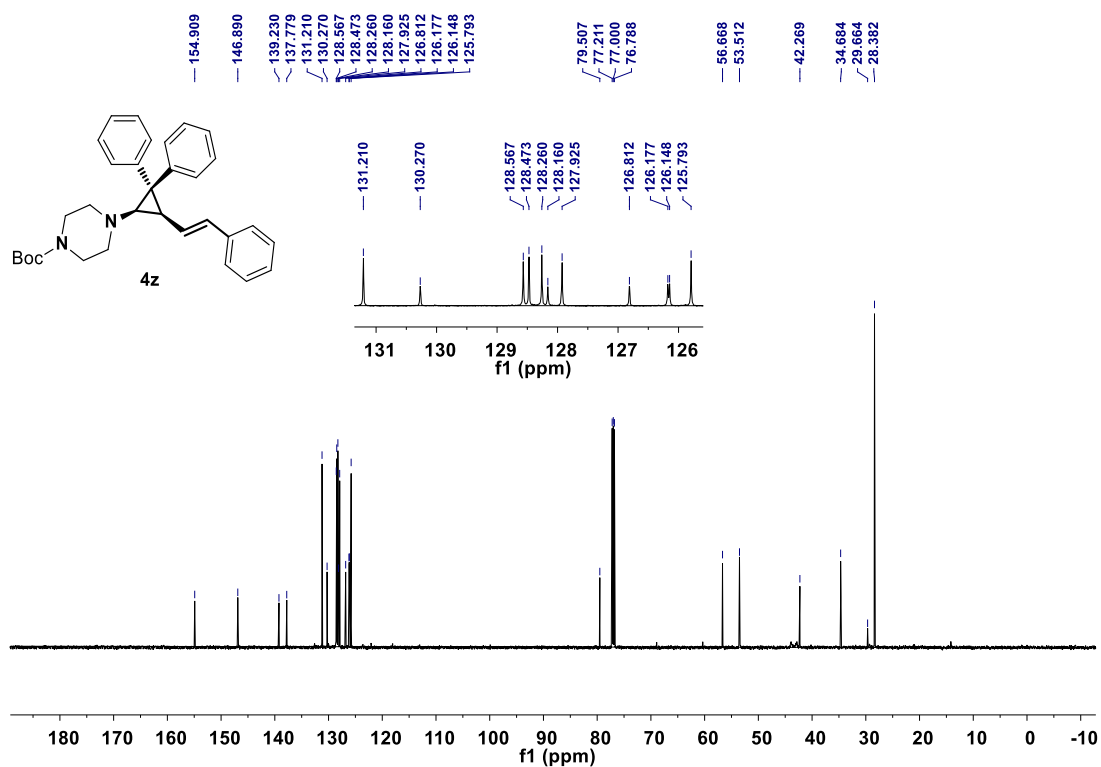

**<sup>13</sup>C NMR (150 MHz, CDCl<sub>3</sub>) spectrum for compound 4z.**

**HPLC Conditions:** CHIRALCEL IC column, 95/5 hexanes/*i*-PrOH, 0.4 mL/min;  $t_R$  (major) = 20.5 min,  $t_R$  (minor) = 16.0 min.

**Racemate:**

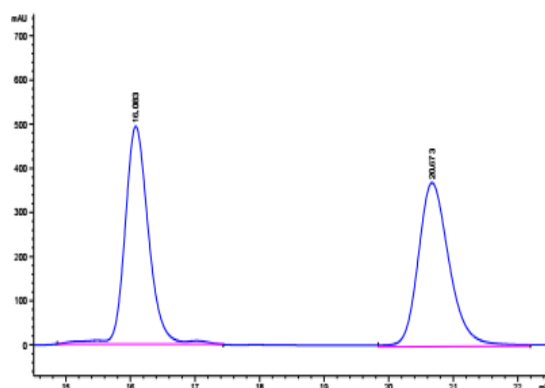

**Chiral sample:**

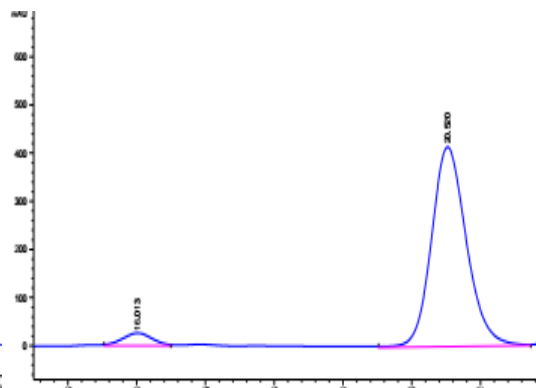

**Racemate:**

| Peak | PetTime | Type | Width(min) | Area(mAu*S) | Hight(mAu) | Area%   |
|------|---------|------|------------|-------------|------------|---------|
| 1    | 16.083  | MM R | 0.4250     | 1.25888e4   | 493.72021  | 50.3411 |
| 2    | 20.673  | MM R | 0.5576     | 1.24182e4   | 371.20801  | 49.6589 |

**Chiral sample:**

| Peak | PetTime | Type | Width(min) | Area(mAu*S) | Hight(mAu) | Area%   |
|------|---------|------|------------|-------------|------------|---------|
| 1    | 16.013  | MM R | 0.4986     | 779.11151   | 26.04366   | 5.0349  |
| 2    | 20.520  | MM R | 0.5906     | 1.46952e4   | 414.70084  | 94.9651 |

**HPLC chromatograph for compound 4z.**

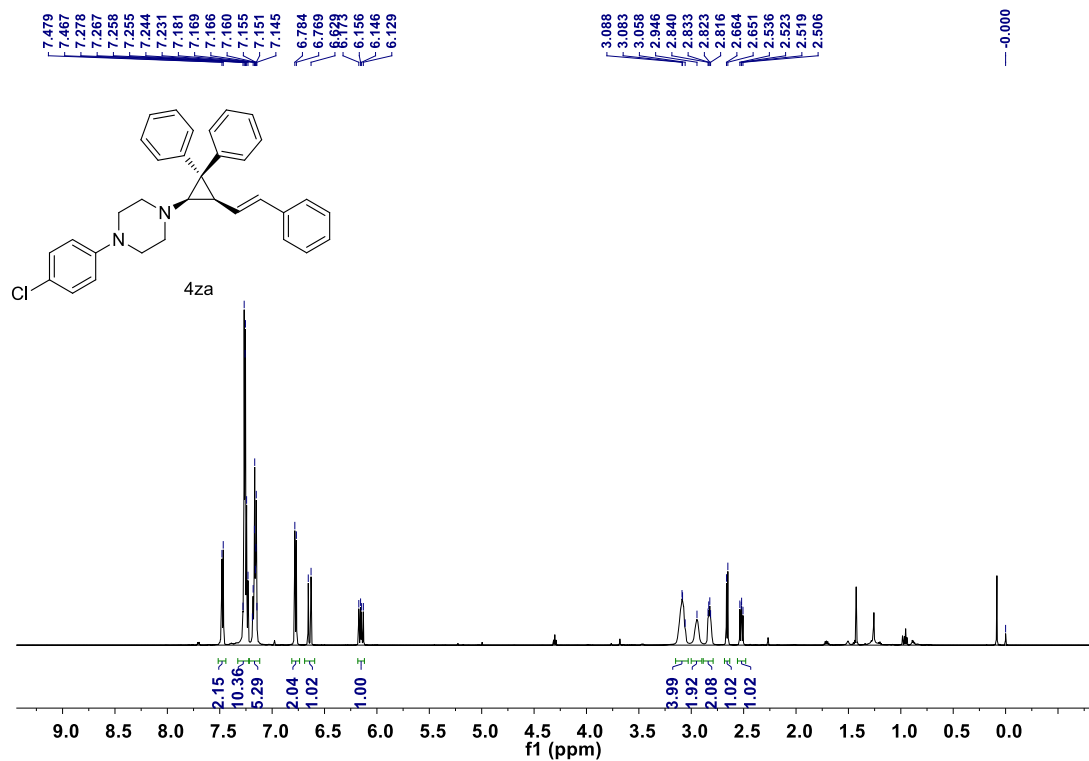

**<sup>1</sup>H NMR (600 MHz, CDCl<sub>3</sub>) spectrum for compound 4za.**

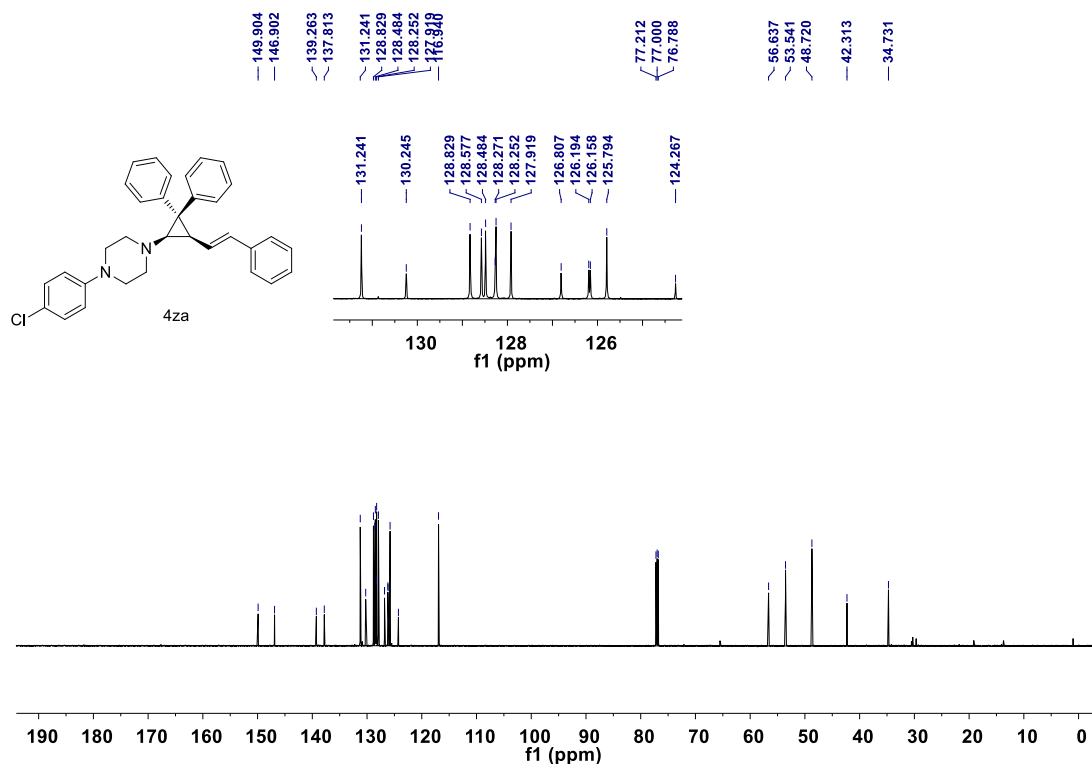

$^{13}\text{C}$  NMR (150 MHz,  $\text{CDCl}_3$ ) spectrum for compound 4za.

**HPLC Conditions:** CHIRALCEL AD-H column, 95/5 hexanes/*i*-PrOH, 0.8 mL/min;  $t_R$  (major) = 12.0 min,  $t_R$  (minor) = 9.3 min.

**Racemate:**

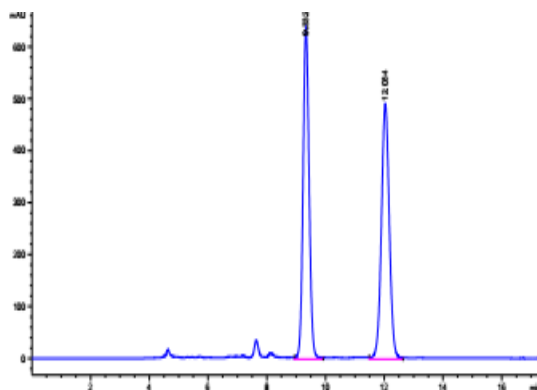

**Chiral sample:**

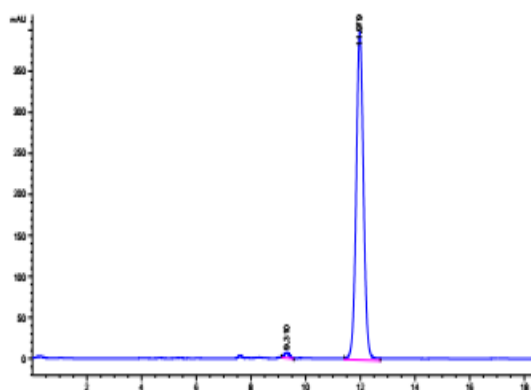

**Racemate:**

| Peak | PetTime | Type | Width(min) | Area(mAu*S) | Hight(mAu) | Area%   |
|------|---------|------|------------|-------------|------------|---------|
| 1    | 9.332   | MM R | 0.2390     | 9167.00879  | 639.29041  | 49.9445 |
| 2    | 12.034  | MM R | 0.3114     | 9187.36914  | 491.67279  | 50.0555 |

**Chiral sample:**

| Peak | PetTime | Type | Width(min) | Area(mAu*S) | Hight(mAu) | Area%   |
|------|---------|------|------------|-------------|------------|---------|
| 1    | 9.310   | MM R | 0.2240     | 88.37115    | 6.57592    | 1.1712  |
| 2    | 11.979  | MM R | 0.3103     | 7456.73145  | 400.53366  | 98.8288 |

**HPLC chromatograph for compound 4za.**



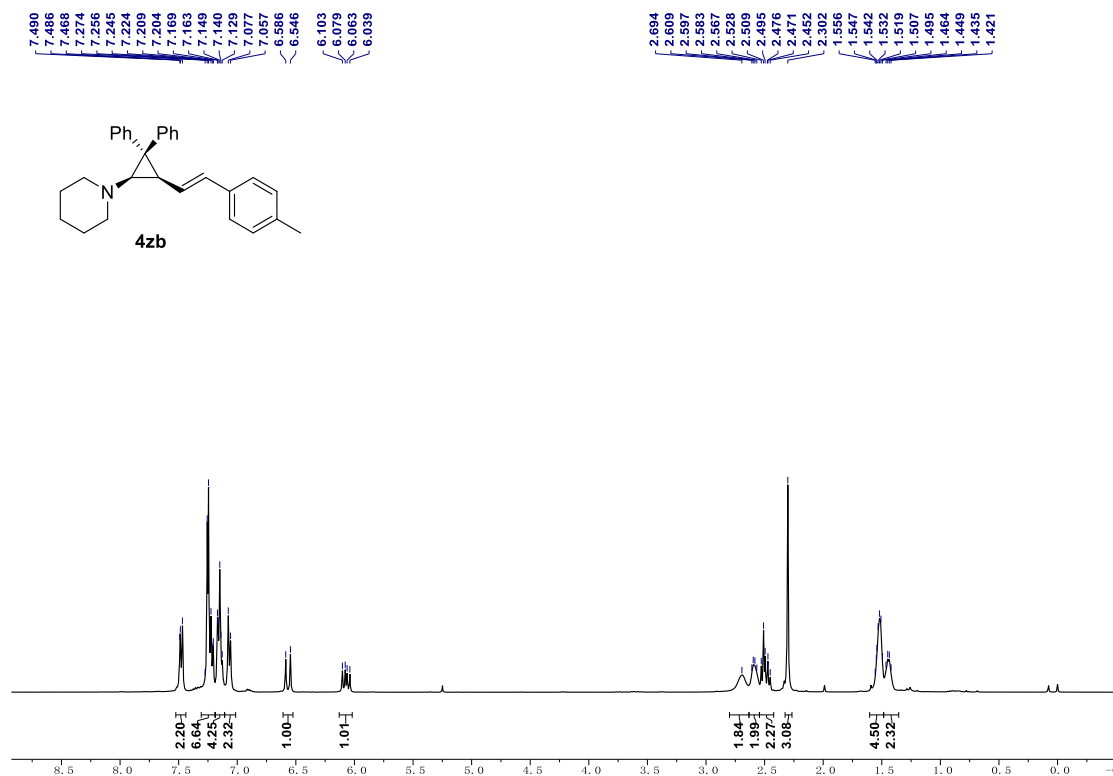

$^1\text{H}$  NMR (400 MHz,  $\text{CDCl}_3$ ) spectrum for compound **4zb**.

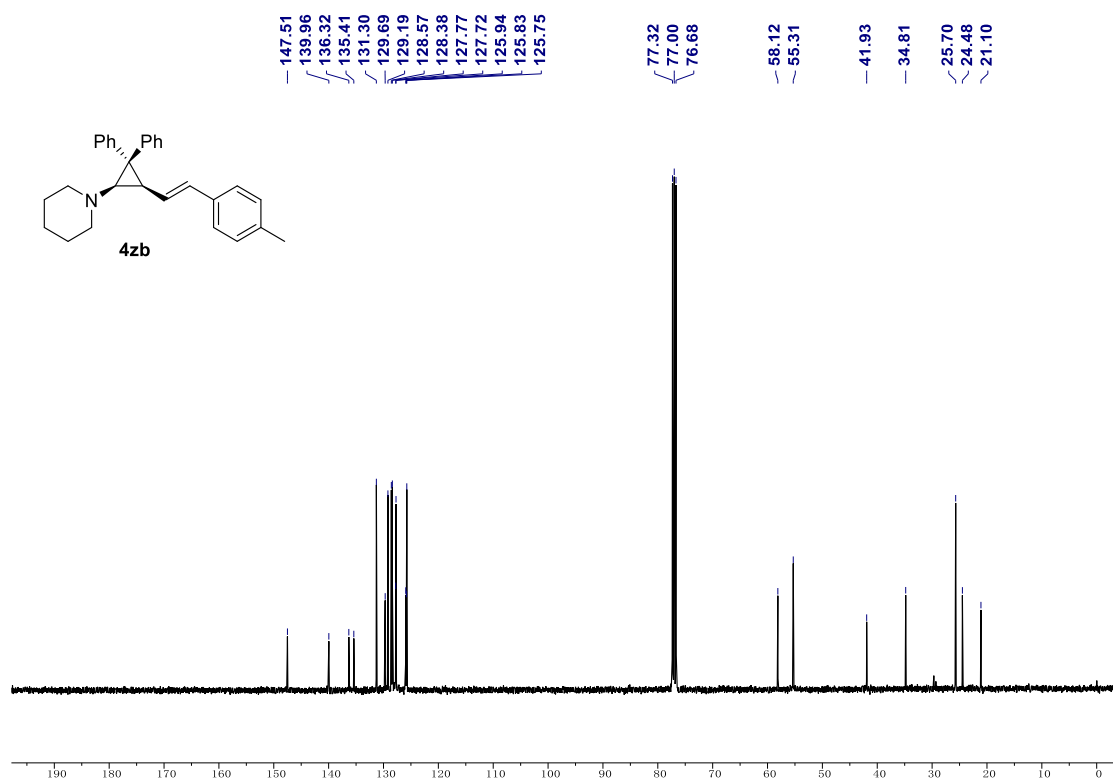

$^{13}\text{C}$  NMR (100 MHz,  $\text{CDCl}_3$ ) spectrum for compound **4zb**.

**HPLC Conditions:** CHIRALCEL OD-3 column, 99/1 hexanes/*i*-PrOH, 0.5 mL/min;  $t_R$  (major) = 7.5 min,  $t_R$  (minor) = 97.9 min.

**Racemic sample:**

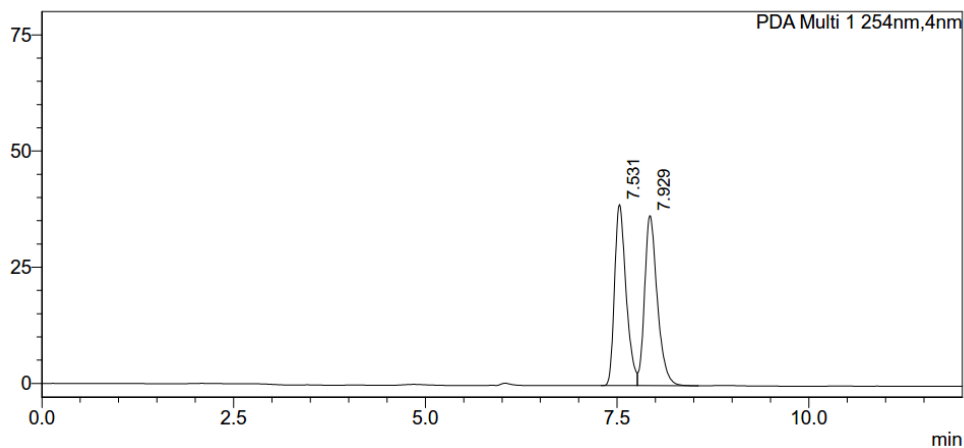

**<Peak Table>**

| PDA Ch1 254nm |           |        |         |        |         |
|---------------|-----------|--------|---------|--------|---------|
| Peak#         | Ret. Time | Area   | Area%   | Height | Height% |
| 1             | 7.531     | 408822 | 49.151  | 38989  | 51.567  |
| 2             | 7.929     | 422952 | 50.849  | 36619  | 48.433  |
| Total         |           | 831774 | 100.000 | 75608  | 100.000 |

**Chiral sample:**

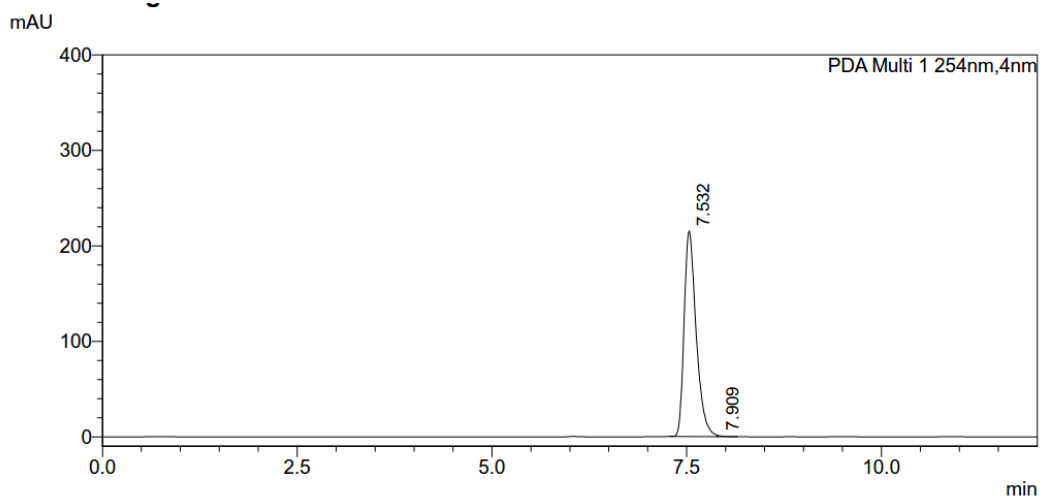

**<Peak Table>**

| PDA Ch1 254nm |           |         |         |        |         |
|---------------|-----------|---------|---------|--------|---------|
| Peak#         | Ret. Time | Area    | Area%   | Height | Height% |
| 1             | 7.532     | 2315626 | 99.789  | 215426 | 99.423  |
| 2             | 7.909     | 4892    | 0.211   | 1251   | 0.577   |
| Total         |           | 2320519 | 100.000 | 216677 | 100.000 |

**HPLC chromatograph for compound 4zb.**

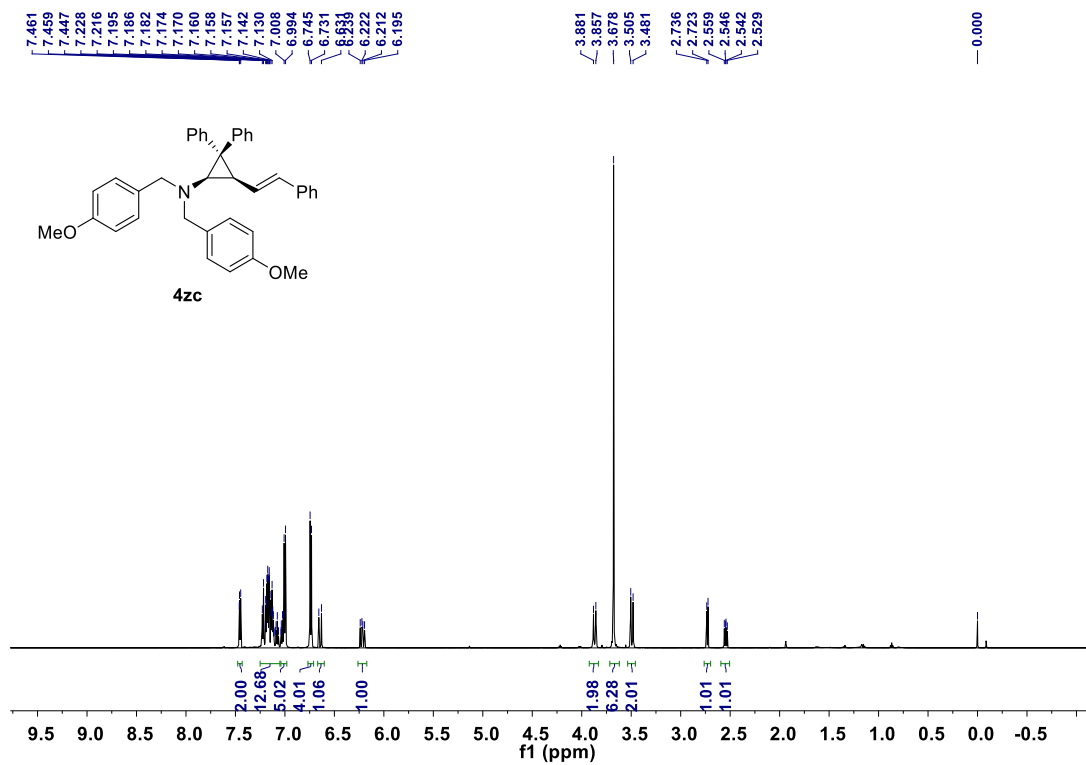

**<sup>1</sup>H NMR (600 MHz, CDCl<sub>3</sub>) spectrum for compound 4zc.**

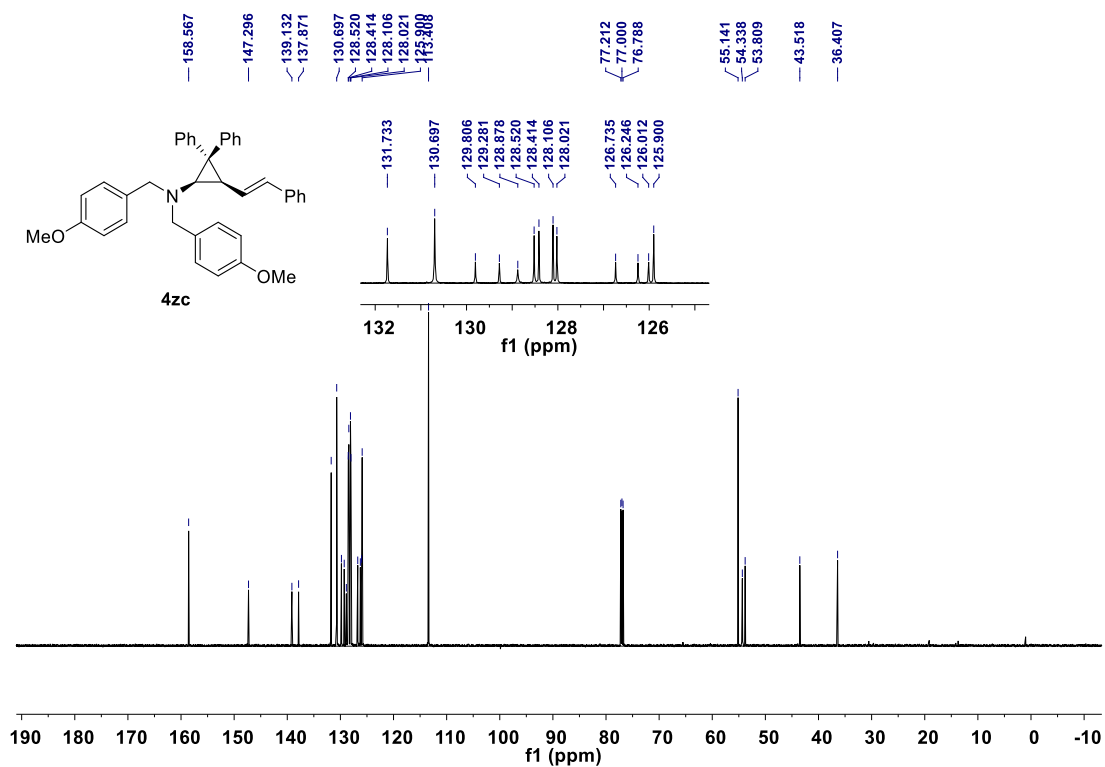

**<sup>13</sup>C NMR (150 MHz, CDCl<sub>3</sub>) spectrum for compound 4zc.**

**HPLC Conditions:** CHIRALCEL AD-H column, 95/5 hexanes/*i*-PrOH, 0.8 mL/min;  $t_R$  (major) = 6.0 min,  $t_R$  (minor) = 10.5 min.

**Racemate:**

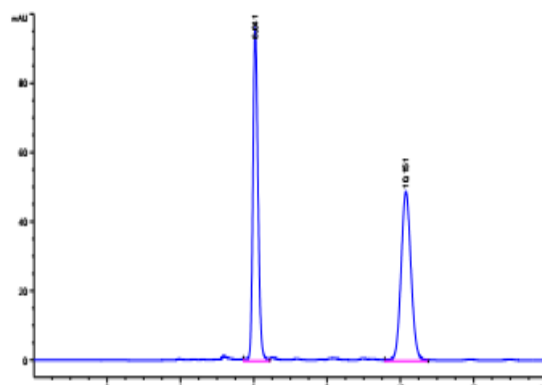

**Chiral sample:**

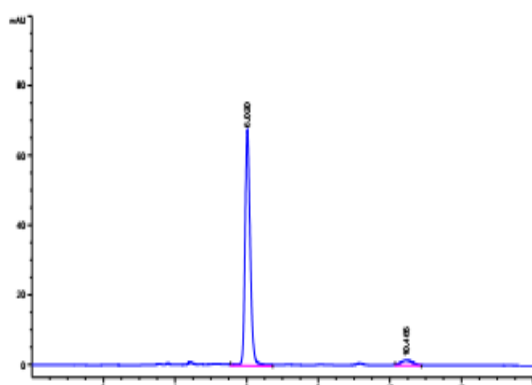

**Racemate:**

| Peak | PetTime | Type | Width(min) | Area(mAu*S) | Hight(mAu) | Area%   |
|------|---------|------|------------|-------------|------------|---------|
| 1    | 6.041   | MM R | 0.1618     | 933.92987   | 96.20237   | 50.0592 |
| 2    | 10.151  | MM R | 0.3168     | 931.72052   | 49.01715   | 49.9408 |

**Chiral sample:**

| Peak | PetTime | Type | Width(min) | Area(mAu*S) | Hight(mAu) | Area%   |
|------|---------|------|------------|-------------|------------|---------|
| 1    | 6.020   | MM R | 0.1683     | 685.04425   | 67.8361    | 94.9071 |
| 2    | 10.465  | MM R | 0.4001     | 36.76100    | 1.53145    | 5.0929  |

**HPLC chromatograph for compound 4zc.**

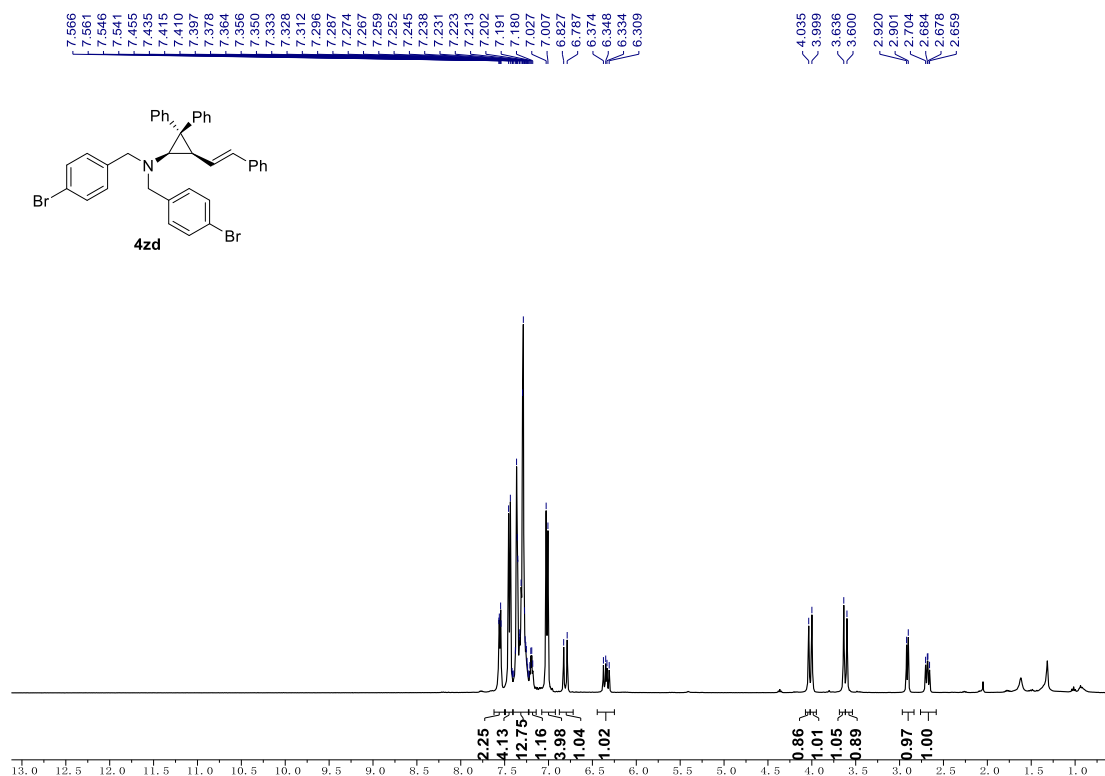

**<sup>1</sup>H NMR (400 MHz, CDCl<sub>3</sub>) spectrum for compound 4zd.**

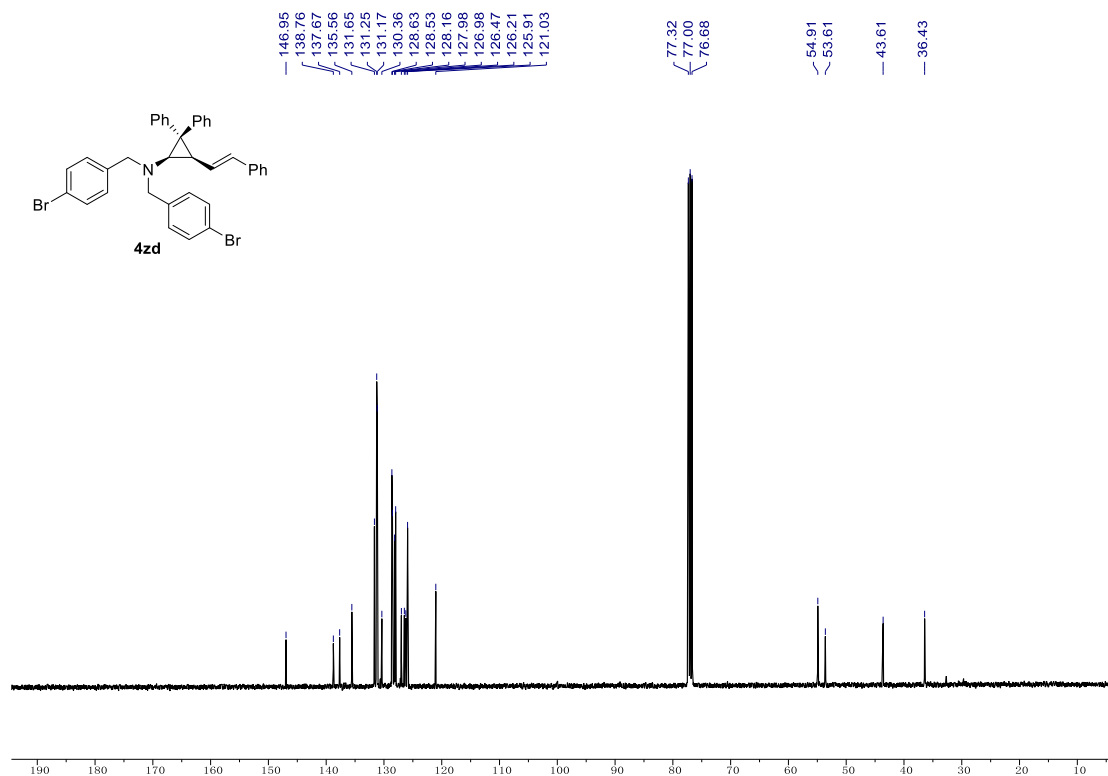

$^{13}\text{C}$  NMR (100 MHz,  $\text{CDCl}_3$ ) spectrum for compound 4zd.

**HPLC Conditions:** CHIRALCEL AD-H column, 98/2 hexanes/*i*-PrOH, 0.5 mL/min;  $t_R$  (major) = 9.1 min,  $t_R$  (minor) = 10.1 min.

*Racemic sample:*

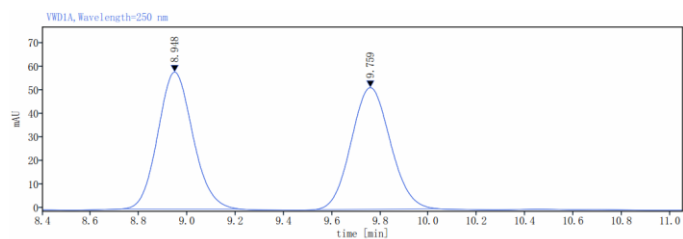

Signal: VWD1A, Wavelength=250 nm

| Peak  | Type | Width(min) | Area   | Hight(mAu) | Area% |
|-------|------|------------|--------|------------|-------|
| 8.948 | MM m | 0.50       | 587.67 | 58.25      | 50.21 |
| 9.759 | MM m | 0.51       | 582.87 | 51.75      | 49.79 |

*Chiral sample:*

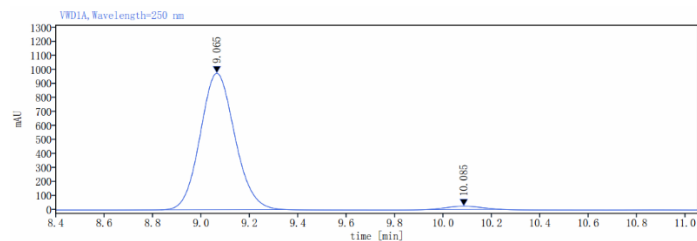

Signal: VWD1A, Wavelength=250 nm

| Peak   | Type | Width(min) | Area    | Hight(mAu) | Area% |
|--------|------|------------|---------|------------|-------|
| 9.065  | MM m | 0.52       | 9675.41 | 975.07     | 97.66 |
| 10.085 | MM m | 0.32       | 231.60  | 23.07      | 2.34  |

**HPLC chromatograph for compound 4zd.**

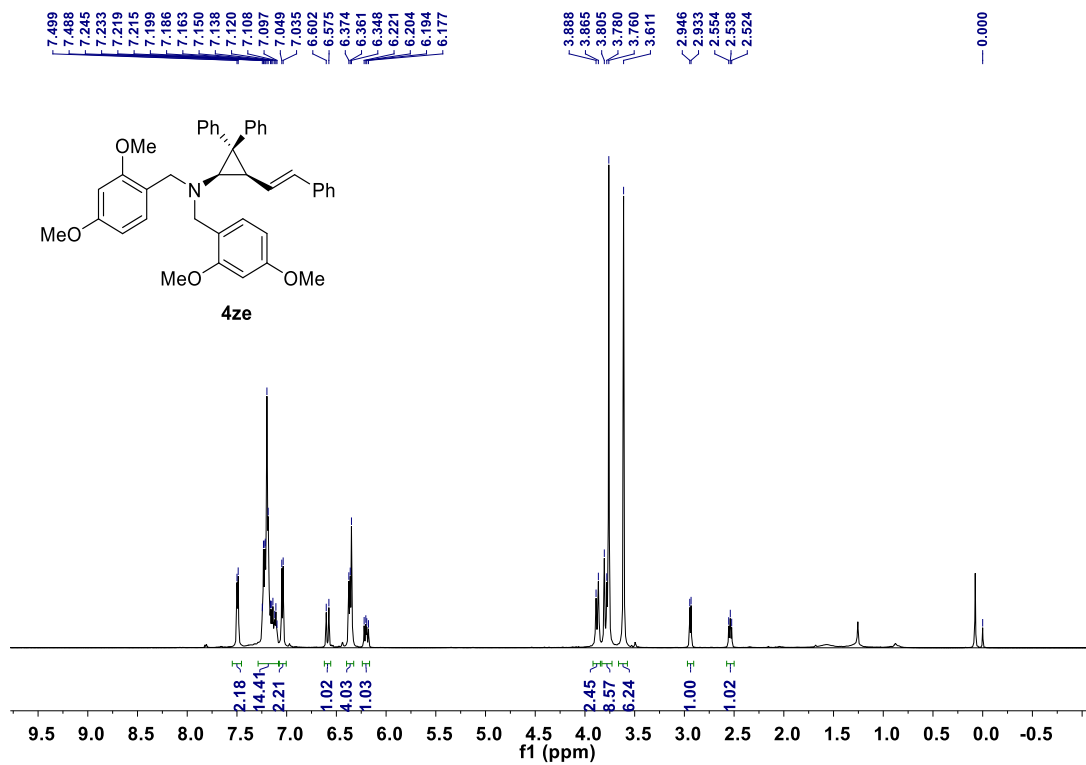

**<sup>1</sup>H NMR (600 MHz, CDCl<sub>3</sub>) spectrum for compound 4ze.**

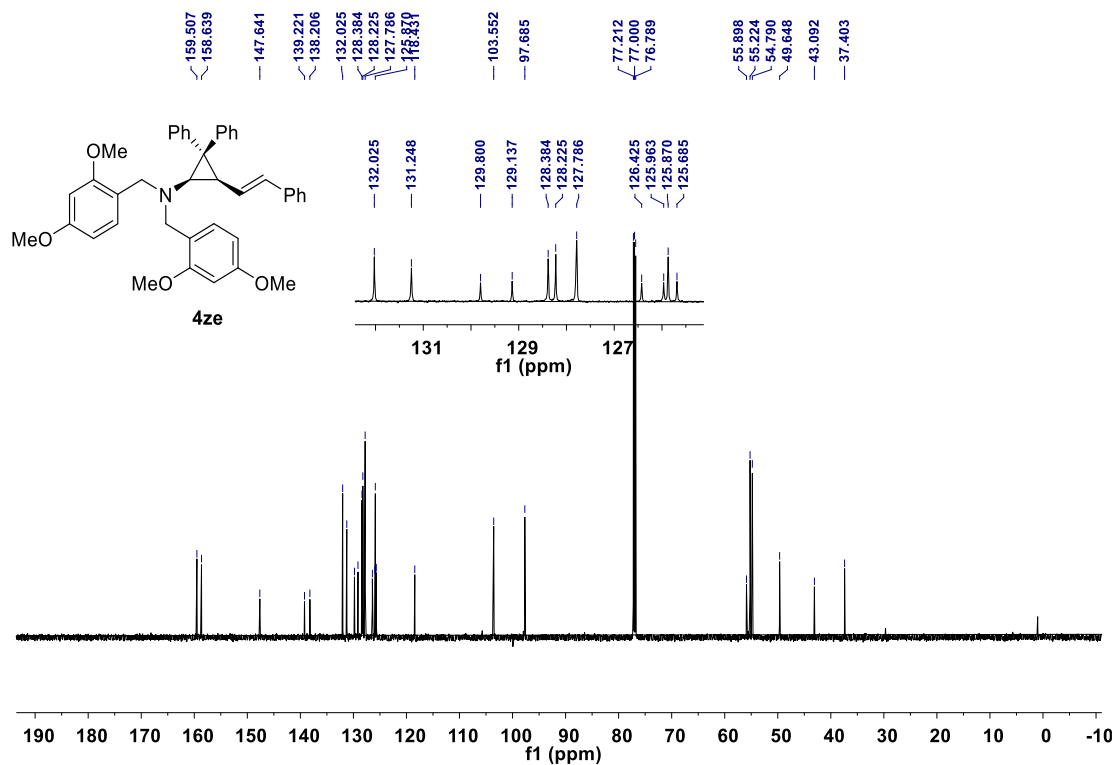

**<sup>13</sup>C NMR (150 MHz, CDCl<sub>3</sub>) spectrum for compound 4ze.**

**HPLC Conditions:** CHIRALCEL AD-H column, 97/3 hexanes/*i*-PrOH, 1.0 mL/min;  $t_R$  (major) = 6.1 min,  $t_R$  (minor) = 7.8 min.

**Racemate:**

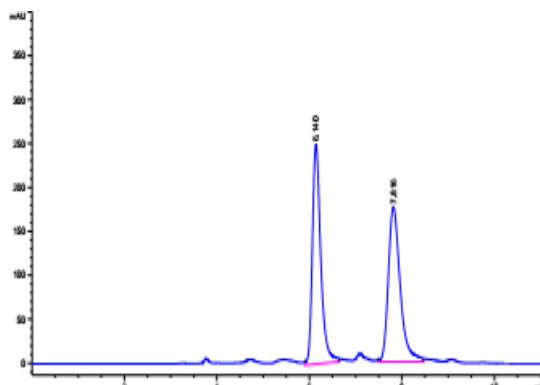

**Chiral sample:**

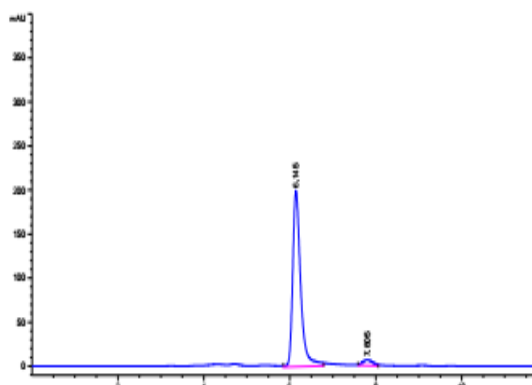

**Racemate:**

| Peak | PetTime | Type | Width(min) | Area(mAu*S) | Hight(mAu) | Area%   |
|------|---------|------|------------|-------------|------------|---------|
| 1    | 6.140   | MM R | 0.2102     | 3151.17676  | 249.86369  | 50.0691 |
| 2    | 7.816   | MM R | 0.2967     | 3142.47363  | 176.50948  | 49.9309 |

**Chiral sample:**

| Peak | PetTime | Type | Width(min) | Area(mAu*S) | Hight(mAu) | Area%   |
|------|---------|------|------------|-------------|------------|---------|
| 1    | 6.145   | MM R | 0.2135     | 2558.53540  | 199.71696  | 96.0520 |
| 2    | 7.805   | MM R | 0.2726     | 105.16268   | 6.42934    | 3.9480  |

**HPLC chromatograph for compound 4ze.**

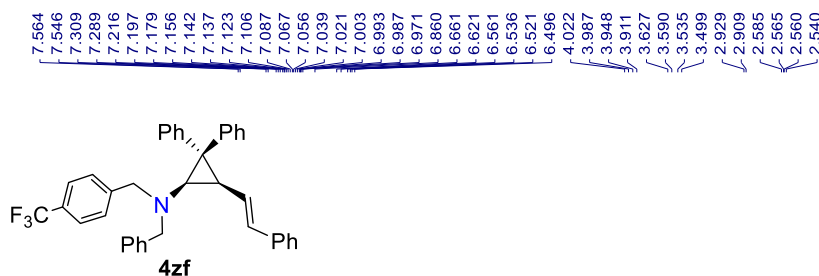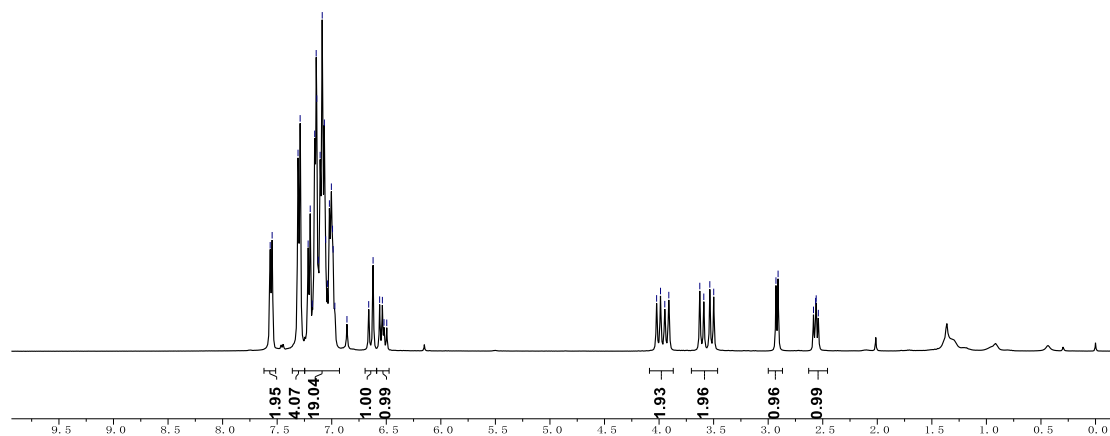

**$^1\text{H}$  NMR (400 MHz,  $\text{C}_6\text{D}_6$ ) of compound 4zf.**

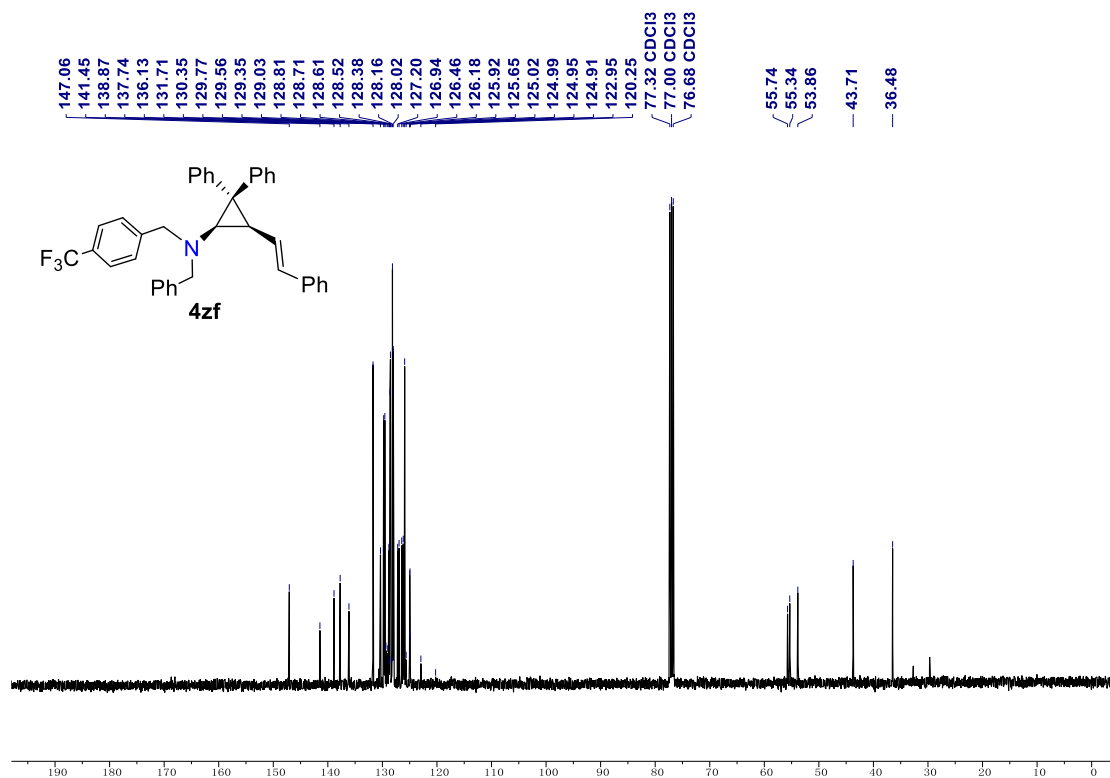

<sup>13</sup>C NMR (101 MHz, CDCl<sub>3</sub>) spectrum for compound 4zf.

HPLC conditions: Chiralpak AD-3 column (hexanes: 2-propanol = 99:1, 0.5 mL/min, 254 nm); t(major)= 10.2 min, t(minor) = 11.2 min.

Racemic sample:

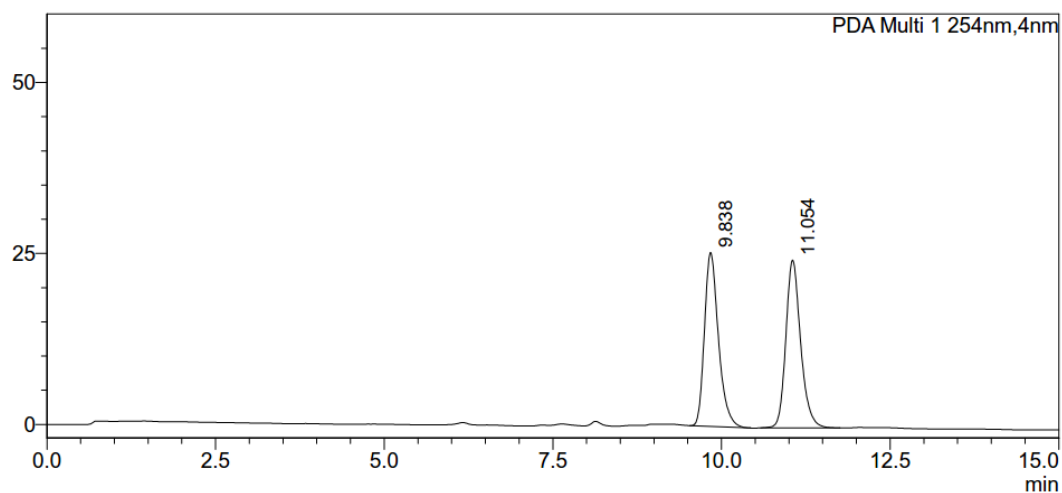

<Peak Table>

PDA Ch1 254nm

| Peak# | Ret. Time | Area   | Area%   | Height | Height% |
|-------|-----------|--------|---------|--------|---------|
| 1     | 9.838     | 367001 | 49.455  | 25435  | 50.898  |
| 2     | 11.054    | 375094 | 50.545  | 24538  | 49.102  |
| Total |           | 742094 | 100.000 | 49972  | 100.000 |



**Chiral sample:**

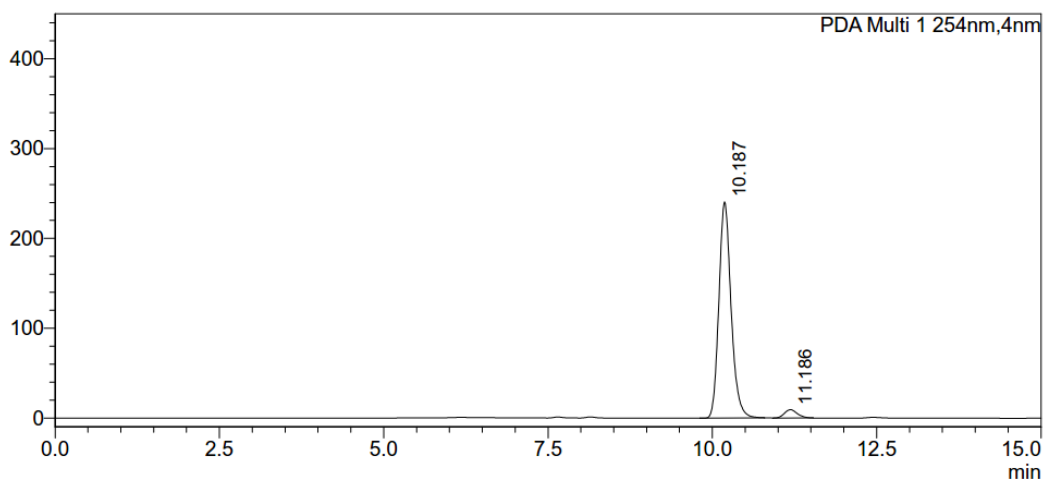

**<Peak Table>**

PDA Ch1 254nm

| Peak# | Ret. Time | Area    | Area%   | Height | Height% |
|-------|-----------|---------|---------|--------|---------|
| 1     | 10.187    | 3108236 | 96.097  | 240869 | 96.305  |
| 2     | 11.186    | 126253  | 3.903   | 9242   | 3.695   |
| Total |           | 3234489 | 100.000 | 250111 | 100.000 |

**HPLC chromatograph for compound 4zf.**

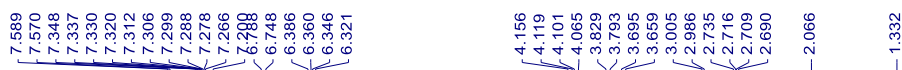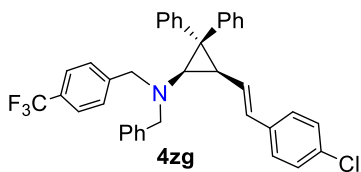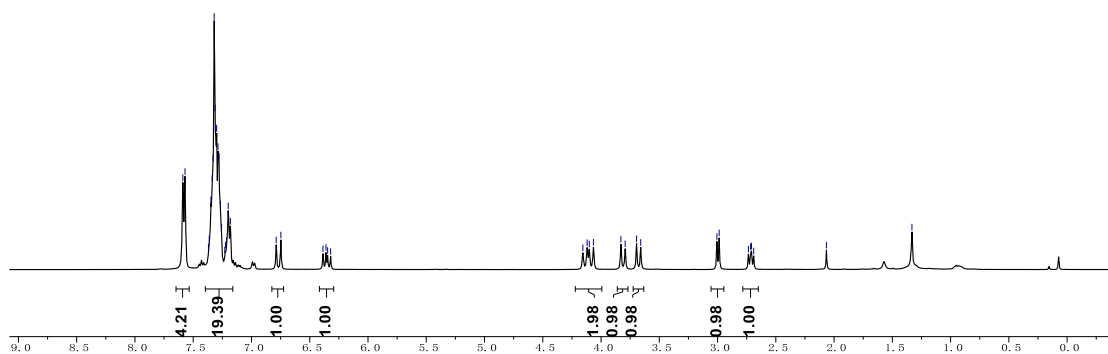

**<sup>1</sup>H NMR (400 MHz, C<sub>6</sub>D<sub>6</sub>) of compound 4zg.**

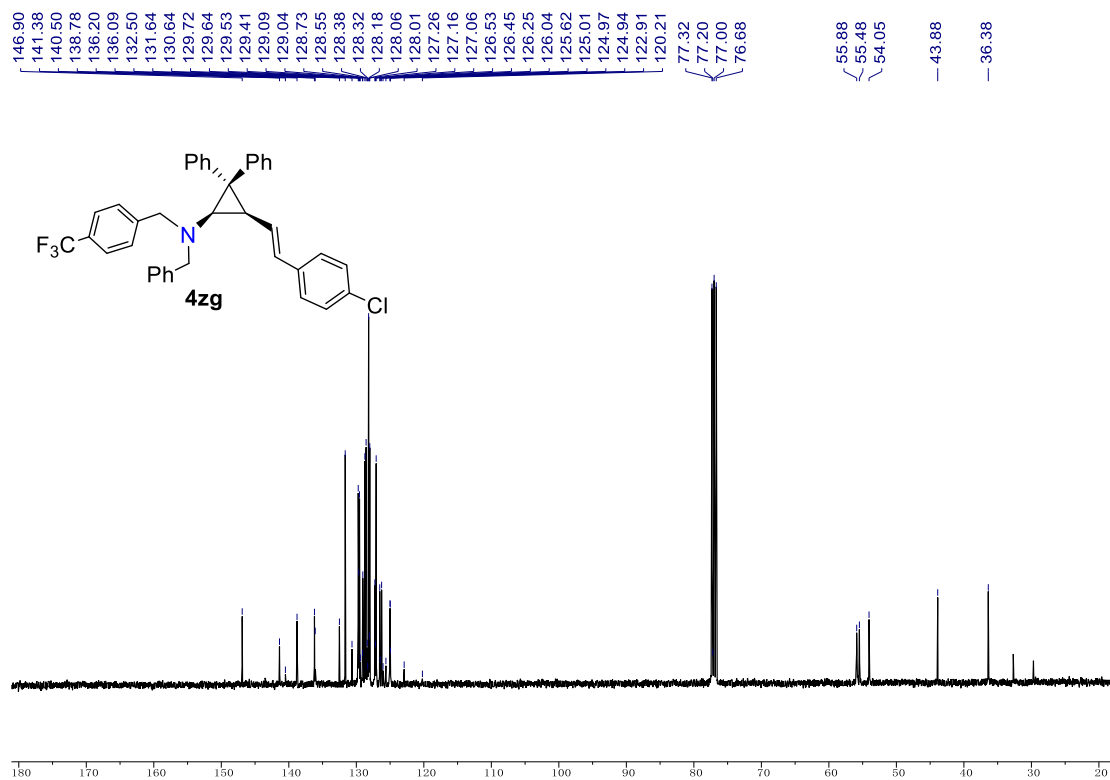

<sup>13</sup>C NMR (101 MHz, CDCl<sub>3</sub>) spectrum for compound 4zg.

HPLC conditions: Chiralpak IA column (hexanes: 2-propanol = 99:1, 0.5 mL/min, 254 nm); t(major)= 10.0 min; t(minor)= 10.8 min

**Racemic sample:**

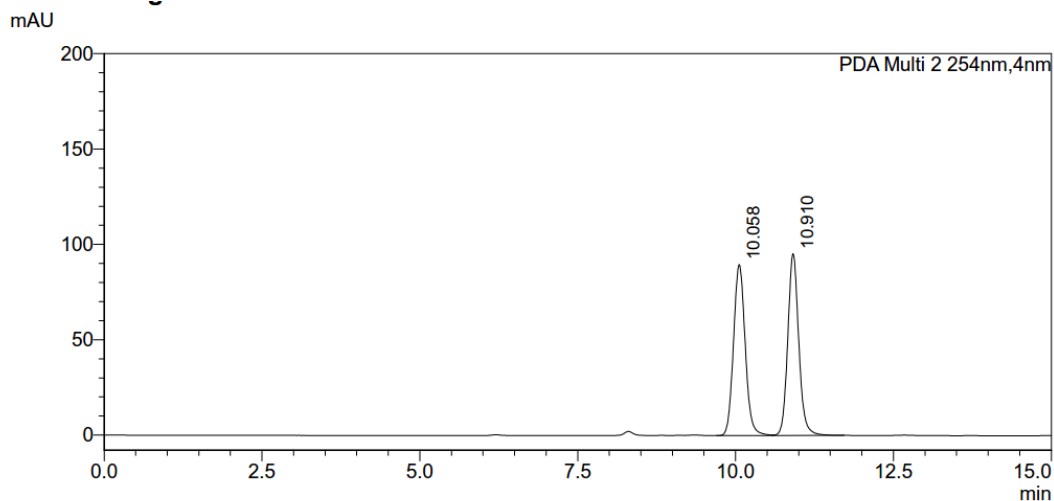

**<Peak Table>**

PDA Ch2 254nm

| Peak# | Ret. Time | Area    | Area%   | Height | Height% |
|-------|-----------|---------|---------|--------|---------|
| 1     | 10.058    | 1157621 | 50.019  | 89683  | 48.465  |
| 2     | 10.910    | 1156745 | 49.981  | 95364  | 51.535  |
| Total |           | 2314366 | 100.000 | 185048 | 100.000 |

**Chiral sample:**

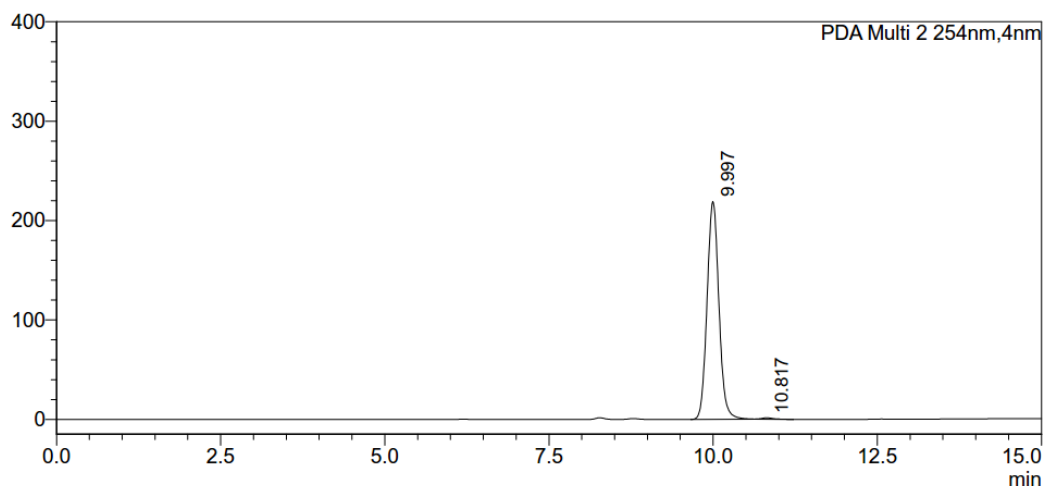

**<Peak Table>**

PDA Ch2 254nm

| Peak# | Ret. Time | Area    | Area%   | Height | Height% |
|-------|-----------|---------|---------|--------|---------|
| 1     | 9.997     | 2754990 | 99.380  | 219098 | 99.349  |
| 2     | 10.817    | 17193   | 0.620   | 1437   | 0.651   |
| Total |           | 2772182 | 100.000 | 220534 | 100.000 |

**HPLC chromatograph for compound 4zg.**

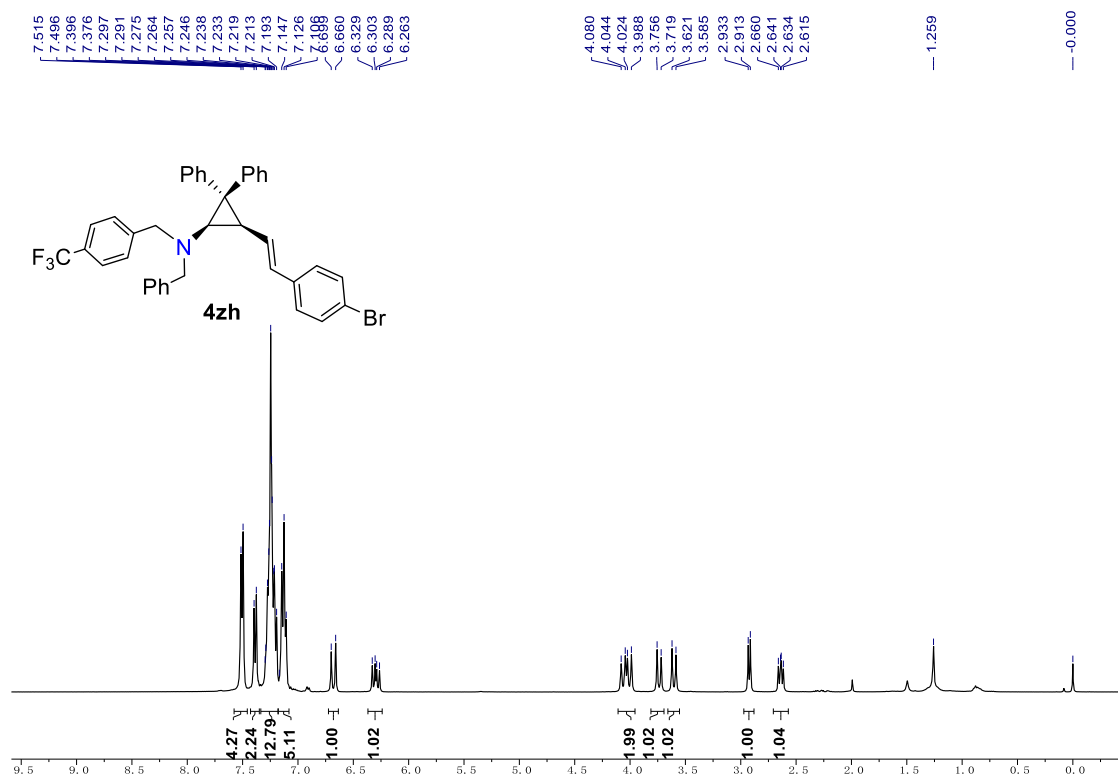

**<sup>1</sup>H NMR (400 MHz, CDCl<sub>3</sub>) of compound 4zh.**

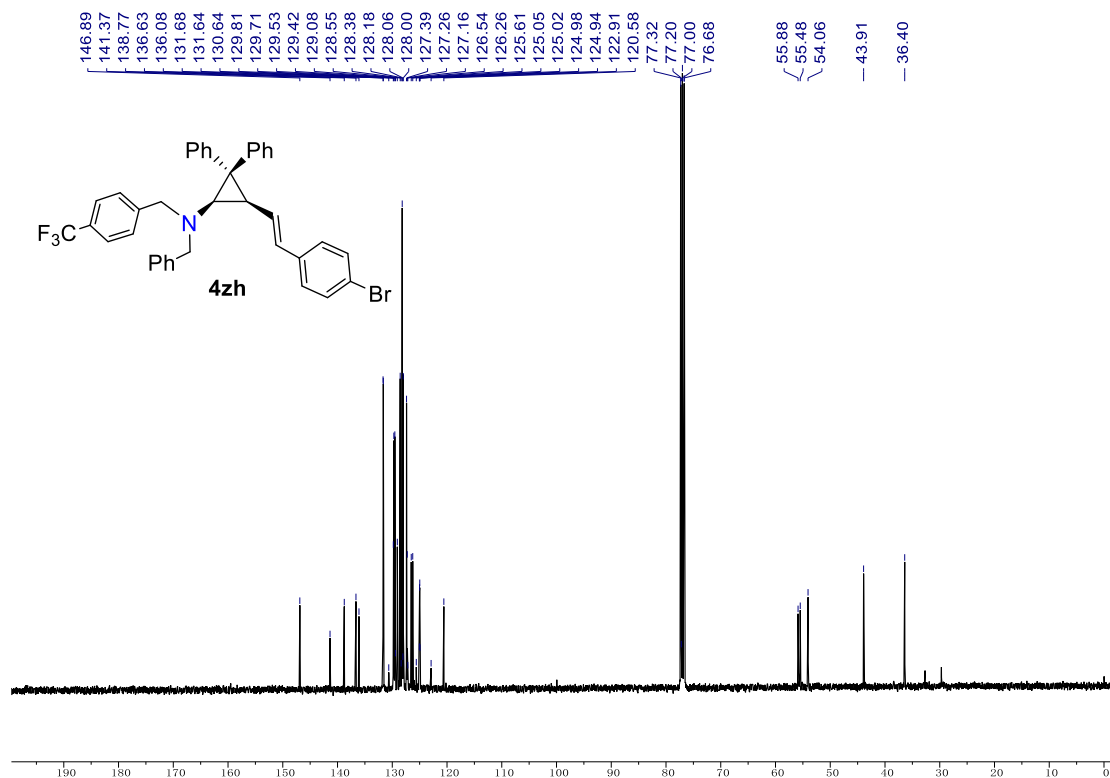

<sup>13</sup>C NMR (101 MHz, CDCl<sub>3</sub>) spectrum for compound 4zh.

HPLC conditions: Chiralpak IA column (hexanes: 2-propanol = 98:2, 0.5 mL/min, 254 nm); t(major)= 10.7 min; t(minor)= 8.8 min

**Racemic sample:**

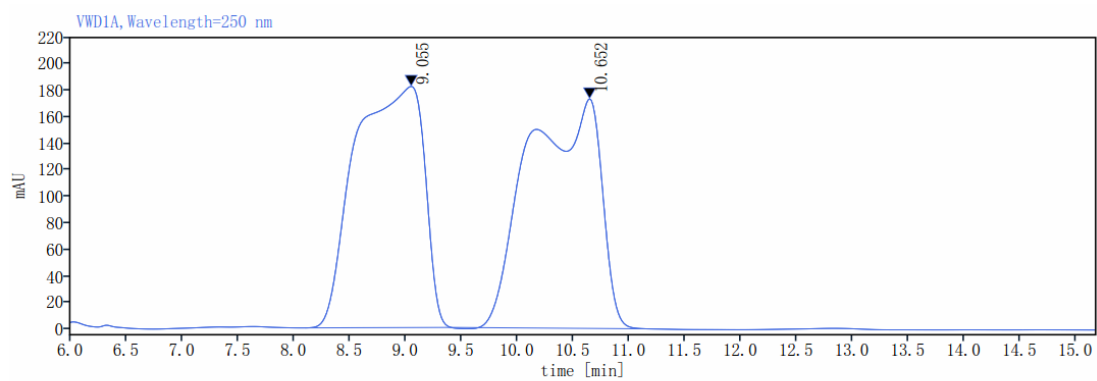

| Peak   | Type | Width(min) | Area    | Hight (mAu) | Area% |
|--------|------|------------|---------|-------------|-------|
| 9.055  | MM m | 1.31       | 7825.22 | 181.71      | 50.17 |
| 10.652 | MM m | 1.76       | 7773.70 | 172.91      | 49.83 |

## Chiral sample:

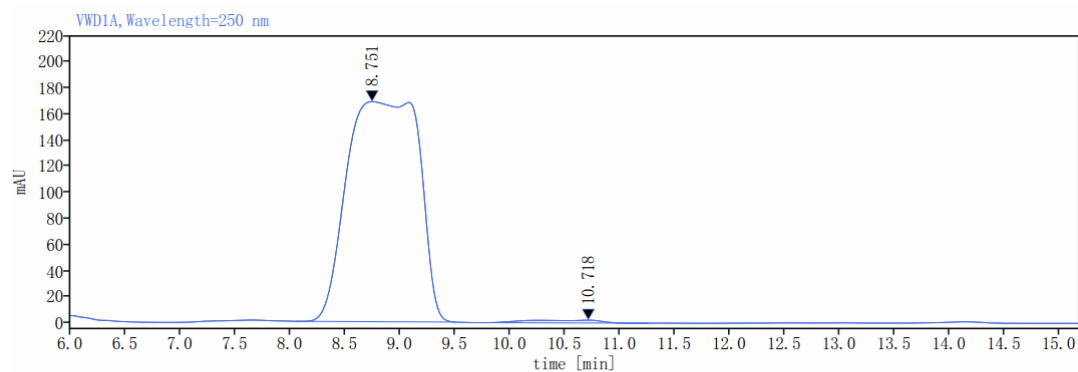

Signal: VWD1A, Wavelength=250 nm

| Peak   | Type | Width (min) | Area    | Hight (mAu) | Area% |
|--------|------|-------------|---------|-------------|-------|
| 8.751  | MM m | 1.45        | 7750.52 | 168.54      | 98.78 |
| 10.718 | MM m | 1.44        | 95.83   | 2.14        | 1.22  |

## HPLC chromatograph for compound 4zh.

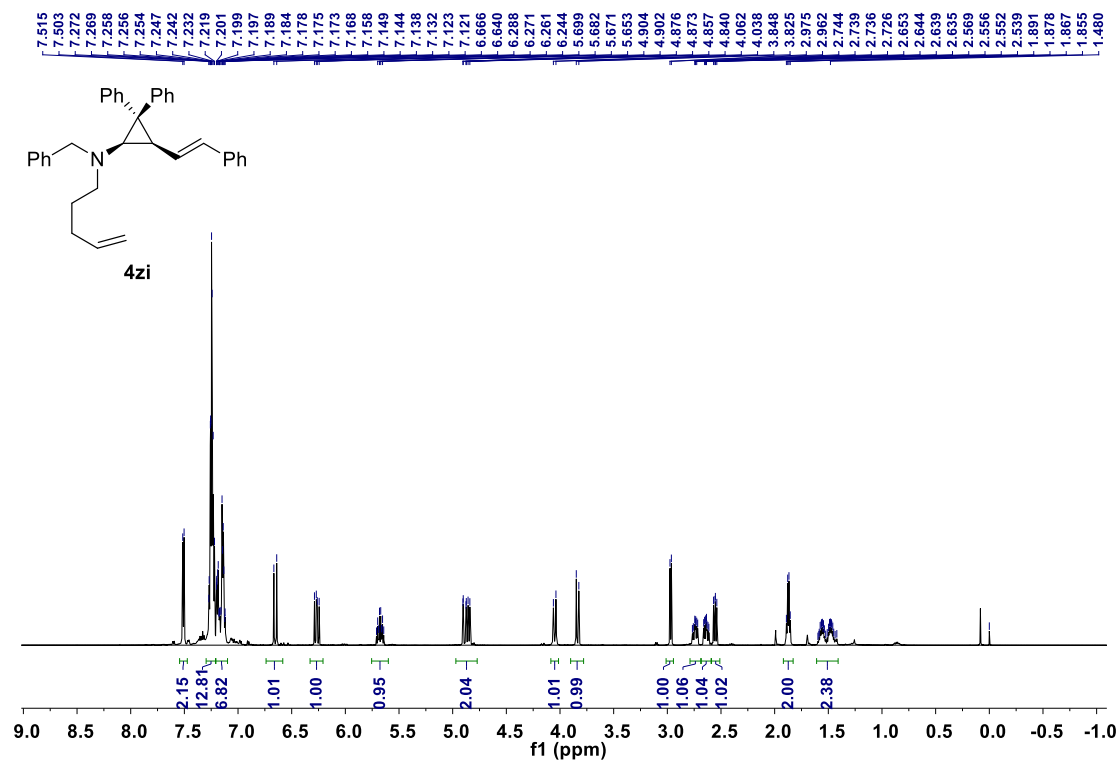

## <sup>1</sup>H NMR (600 MHz, CDCl<sub>3</sub>) spectrum for compound 4zi.

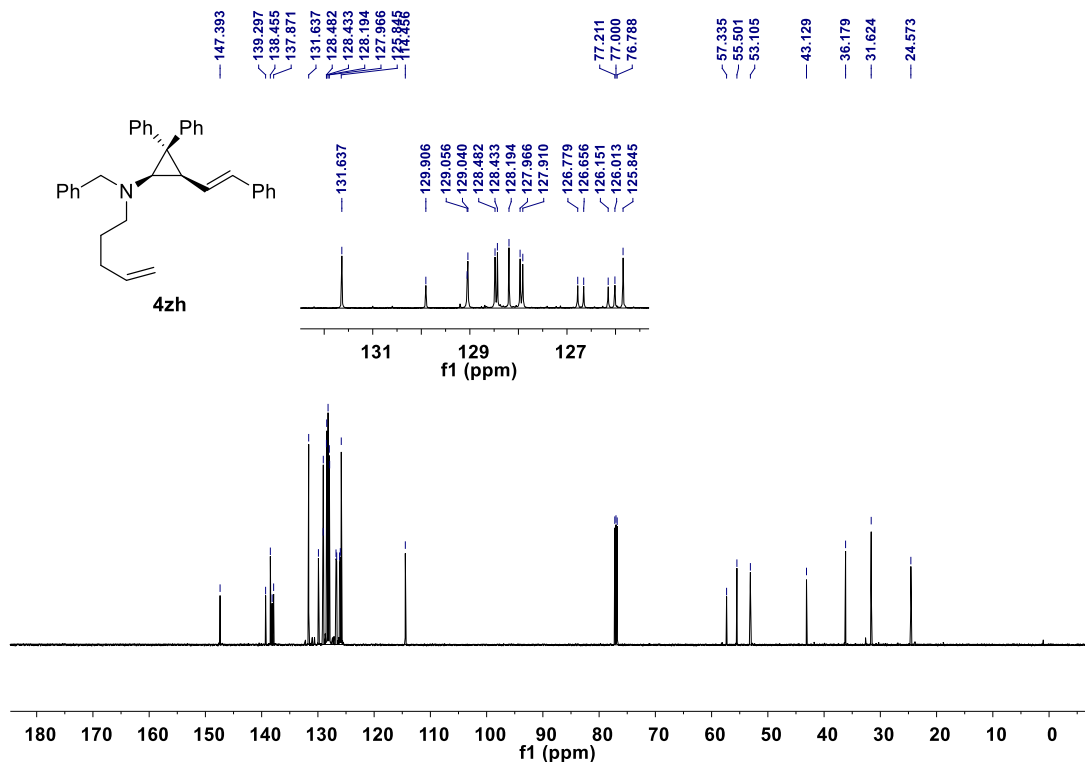

<sup>13</sup>C NMR (150 MHz, CDCl<sub>3</sub>) spectrum for compound 4zi.

**HPLC Conditions:** CHIRALCEL IA column, 100% hexanes, 0.4 mL/min; t<sub>R</sub> (major) = 12.9 min, t<sub>R</sub> (minor) = 12.4 min.

**Racemate:**

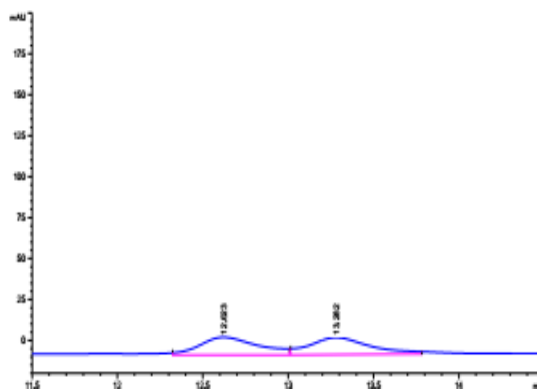

**Chiral sample:**

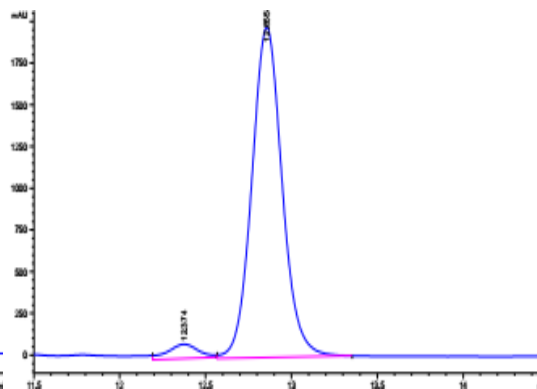

**Racemate:**

| Peak | PetTime | Type | Width(min) | Area(mAu*S) | Hight(mAu) | Area%   |
|------|---------|------|------------|-------------|------------|---------|
| 1    | 12.623  | MM R | 0.3956     | 254.28462   | 10.71288   | 49.7631 |
| 2    | 13.282  | MM R | 0.4115     | 256.70541   | 10.39593   | 50.2369 |

**Chiral sample:**

| Peak | PetTime | Type | Width(min) | Area(mAu*S) | Hight(mAu) | Area%   |
|------|---------|------|------------|-------------|------------|---------|
| 1    | 12.374  | MM R | 0.2051     | 1052.33154  | 85.50887   | 4.1452  |
| 2    | 12.855  | MM R | 0.2047     | 2.43343e4   | 1980.92590 | 95.8548 |

**HPLC chromatograph for compound 4zi.**
